# Supplementary material
Source: PubMed Central journal article supplement (PMC2533111)
Supplement: NIHMS61264-supplement-si20060721_112.pdf [file NIHMS61264-supplement-si20060721_112.pdf]

Supporting information for *J. Org. Chem.*

# Reactivity of Molecular Oxygen with Ethoxycarbonyl Derivatives of Tetrathiaatriarylmethyl Radicals

Shijing Xia,<sup>†</sup> Frederick A. Villamena,<sup>\*,‡</sup> Christopher M. Hadad,<sup>\*,†</sup> Periannan  
Kuppusamy,<sup>‡</sup> Yunbo Li,<sup>‡</sup> Hong Zhu<sup>‡</sup> and Jay L. Zweier<sup>\*,‡</sup>

<sup>†</sup>*Department of Chemistry, The Ohio State University, Columbus, OH 43210 USA and*

<sup>‡</sup>*Center for Biomedical EPR Spectroscopy and Imaging, The Davis Heart and Lung  
Research Institute, and the Division of Cardiovascular Medicine, Department of Internal  
Medicine, College of Medicine, The Ohio State University, Columbus, OH 43210 USA*

|                                                  |          |
|--------------------------------------------------|----------|
| General methods                                  | S2-S5    |
| Mass spectra                                     | S6-S28   |
| <sup>1</sup> H- and <sup>13</sup> C- NMR spectra | S29-S52  |
| EPR spectra                                      | S53-S58  |
| Computational results                            | S59-S110 |

## General Methods.

All reactions were performed under an argon atmosphere. Common solvents were purified before use. Diethyl ether was distilled from sodium-benzophenone ketyl. Toluene and benzene were distilled from calcium hydride. N,N-dimethylformamide (DMF) was dried by molecular sieves. All reagents were reagent grade and purified further when necessary. Reactions were monitored by thin layer chromatography (TLC) using 5×20cm selecto scientific precoated silica gel plates. Flash Column chromatography was performed over silica gel 60A (200-400mesh). HPLC used 1:11 ~ 1:4 ration of water:acetonitrile as eluents and C18 column. Melting points (mp) were measured on an Electrothermal capillary melting point apparatus and are uncorrected. Infrared spectra (IR) were recorded with FT-IR spectrometer and were reported in reciprocal centimeter ( $\text{cm}^{-1}$ ). UV-vis absorption were measured in the concentration 100~200  $\mu\text{M}$  from 200~800 nm at room temperature. Carbon and proton NMR spectra were recorded on 250MHz and 400MHz spectrometer.  $^1\text{H}$  NMR chemical shifts are reported as  $\delta$  values (ppm) relative to deuteriochloroform (7.25 ppm), and splitting patterns are designated as: s=singlet, d=doublet, t=triplet, q=quartet, m=multiplet.  $^{13}\text{C}$  NMR chemical shifts are reported as  $\delta$  values (ppm) relative to deuteriochloroform (77.0 ppm). EPR measurements were carried out on an TMRF 134 EMX instrument at room temperature.

Electrospray ionization (ESI) mass spectrometry analyses were performed with a FTMS Fourier Transform mass spectrometer. Sample was introduced to an electrospray ionization source, and was focused into the FTMS cell using a

home-built set of ion optics. This process generated the sodiated molecular ion (usually as the singly-charged species), denoted as  $((M+Na)^+)$ . But in some cases, acetic acid or trifluoroacetic acid was used to generate the protonated molecular ion  $((M+H)^+)$  instead. Electron impact (EI) ionization was performed with a MS using 70 eV ionization conditions. Matrix assisted laser desorption/ionization time-of-flight (MALDI- TOF) was performed on a mass spectrometer operated in linear, positive ion mode with a  $N_2$  laser. Laser power was used at the threshold level required to generate signal. Accelerating voltage was set to 28 kV. The instrument was calibrated with peptide standards bracketing the molecular weights of the peptide samples (typically mixtures of a Bradykinin fragment 1-5 and Adrenocortico- tropic hormone fragment 18-39).

#### 1,2,4,5-Tetra-tert-butylthiobenzene (5).

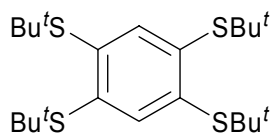

5

To a stirred, degassed solution of 2-methyl-2-propanethiol (39 mL, 348 mmol) in dry DMF (20.0 mL) was added small pieces of sodium (8.1 g, 353 mmol) at 0 °C. The mixture was allowed to reach room temperature and stirred 8 h. 1,2,4,5-Tetrachlorobenzene (14.7 g, 68.1 mmol) was added at once, and the resulting mixture was heated to a gentle reflux for 3 h. After being cooled to room temperature, the reaction mixture was poured over ice (200 g). The precipitate was removed by filtration, washed with water, and dried to give 19.8 g (67.5%) of the title compound as an off-white

powder: mp 146-153 °C; <sup>1</sup>H NMR (100 MHz, CDCl<sub>3</sub>) δ 1.35 (s, 36H), 7.94 (s, 2H); <sup>13</sup>C NMR (400 MHz, CDCl<sub>3</sub>) δ 31.3, 48.1, 139.4, 144.8; IR (CHCl<sub>3</sub>) 2952, 1453, 1416, 1158, 1111, 1052, 883, 725 cm<sup>-1</sup>; MS (ESI, m/z) : 453.176878 (observed, (M+Na<sup>+</sup>)), 453.174848 (exact, (M+Na<sup>+</sup>)).

**2,2,6,6-Tetramethylbenzo[1,2-d;4,5-d']bis[1,3]dithiole (6).**

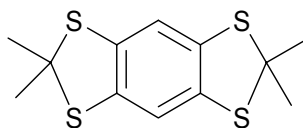

**6**

To a suspension of **5** (8.62 g, 20 mmol) in toluene (80 mL) was added acetone (8 mL) followed by 54% HBF<sub>4</sub> in ether (4.12 mL, 40 mmol) at room temperature. The mixture was stirred at room temperature for 4 h and then heated to reflux for 16 h. After being cooled to room temperature, the resulting black mixture was treated with saturated aqueous NaHCO<sub>3</sub> (80 mL), and the crude product was extracted with ether (2×80 mL). The extracts were dried over MgSO<sub>4</sub> and concentrated in vacuo. The main byproduct of the reaction, *p-tert*-butyltoluene, was also removed under high vacuum at this stage. The resulting pale yellow solid was triturated with MeOH and petroleum ether to give 3.45 g (60%) of the title compound as a white powder: mp 144-147 °C; <sup>1</sup>H NMR (100 MHz, CDCl<sub>3</sub>) δ 1.88 (s, 12H), 7.01 (s, 2H); <sup>13</sup>C NMR (400 MHz, CDCl<sub>3</sub>) δ 31.3, 65.7, 116.8, 135.7; IR (CHCl<sub>3</sub>) 2993, 2960, 1449, 1364, 1324, 1166, 1089, 846, 728 cm<sup>-1</sup>; MS (EI, m/z) : 285.9971 (observed, M<sup>+</sup>), 285.997281 (exact, M<sup>+</sup>).

**Tris(2,2,6,6-tetramethylbenzo[1,2-d;4,5-d']bis[1,3]dithiol-4-yl)methanol (7).**

To a stirred suspension of **6** (0.95 g, 3.3 mmol) in ether (40 mL) was added 2.5 M *n*-BuLi in hexane (1.4 mL, 3.3 mmol) dropwise at room temperature. After the mixture was

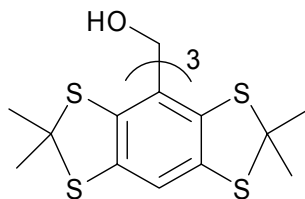

**7**

stirred at 35 °C for 2 h, ClCO<sub>2</sub>Me (77 μL, 0.97 mmol) was added dropwise over 40 min. The resulting orange mixture was stirred and refluxed for 22 h. Saturated aqueous KH<sub>2</sub>PO<sub>4</sub> (15 mL) was added, and the resulting mixture was stirred until the yellow precipitate disappeared. The organic layer was separated, and the aqueous layer was extracted with ether (2×30 mL). The combined organic layers were dried over MgSO<sub>4</sub>, and concentrated in vacuo. The orange residue was crystallized with 5% MeCN in THF (1.5 mL) to give a yellow powder containing THF. The yellow powder was dissolved in benzene and concentrated in vacuo to give 0.38 g (39%) of the title compound as a yellow powder that was a ca. 1:1 mixture of compound **7** / benzene: mp > 290 °C (gradually turned black, dec); <sup>1</sup>H NMR (400 MHz, CDCl<sub>3</sub>) δ 1.67 (s, 9H), 1.71 (s, 9H), 1.80 (s, 9H), 1.81 (s, 9H), 6.20 (s, 1H), 7.16 (s, 3H), 7.35 (s, ca. 6H, benzene); <sup>13</sup>C NMR (100 MHz, CDCl<sub>3</sub>) δ 27.6, 29.1, 32.2, 34.8, 63.3, 64.0, 83.6, 118.1, 128.3 (benzene), 131.8, 137.2, 137.8, 138.3, 139.2; IR (CHCl<sub>3</sub>) 3360, 2960, 2923, 1453, 1361, 1144, 728 cm<sup>-1</sup>; MS (ESI, m/z) : 906.9664 (observed, (M+Na)<sup>+</sup>), 906.961973 (exact, (M+Na)<sup>+</sup>).

# Mass spectra – EI, ESI and MALDI

## Compound 5 (ESI)

|                                        | Peak Number | Mass (m/z) | Abundance (%) | FWHH (m/z) | Resolving Power |
|----------------------------------------|-------------|------------|---------------|------------|-----------------|
| No. of peaks: 3                        |             |            |               |            |                 |
| Height and Width: From Spectrum Points | 1           | 455.18001  | 18.914        | 0.15943    | 2855            |
| Peak Fit Type: Lorentzian              | 2           | 454.17545  | 27.514        | 0.14749    | 3079            |
| Peak Threshold Set: Automatically      | 3           | 453.17688  | 100.000       | 0.15265    | 2969            |
| Min. Peak Width: 3                     |             |            |               |            |                 |
| Search Start: 99.86000 m/z             |             |            |               |            |                 |
| Search Start: 1000.00000 m/z           |             |            |               |            |                 |
| Peak Thresh: 7.73 Relative (%)         |             |            |               |            |                 |
| Noise Thresh: 1.75 Relative (%)        |             |            |               |            |                 |
| Peak S/N: 2.50 (S/N)                   |             |            |               |            |                 |

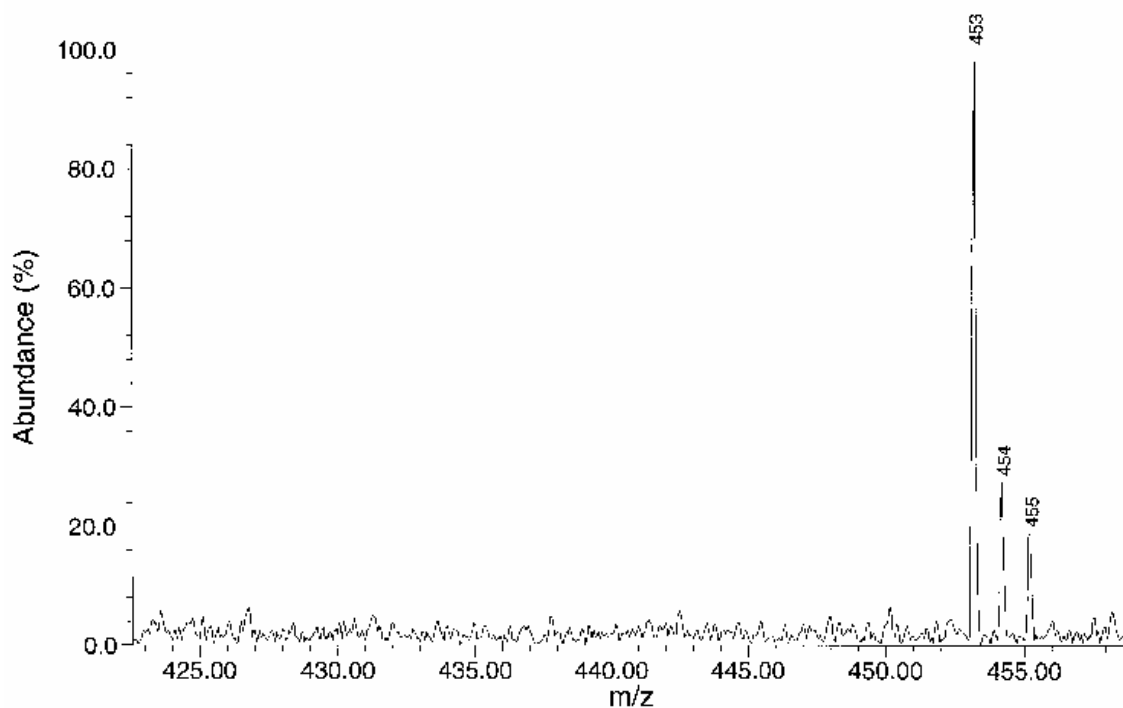

Slice\_20

SX-7-21-2inSNaCl.pro

# Compound 6 (EI)

File Name : J:\GCMS Data\Susie\SX-9-16.ms2  
Creation Date/Time : 9/18/03 at 16:36:51  
File Type : Lo-Res Data - Raw (Magnet)  
File Source : Acquired on MASPEC II system [I132/99B4]  
File Title : SX-9-16

SCAN GRAPH. Flagging=Low Resolution M/z. Ctd=(Thr:900 $\mu$ V, Min.Hgt:250 $\mu$ V, Min.Wid(Mlt):12(12), Inc:50%, Res:85%). Highlighting=Sa  
Scan 11#1:02. Entries=333. Base M/z=57.0706. 100% Int.=0.102. EI. POS.

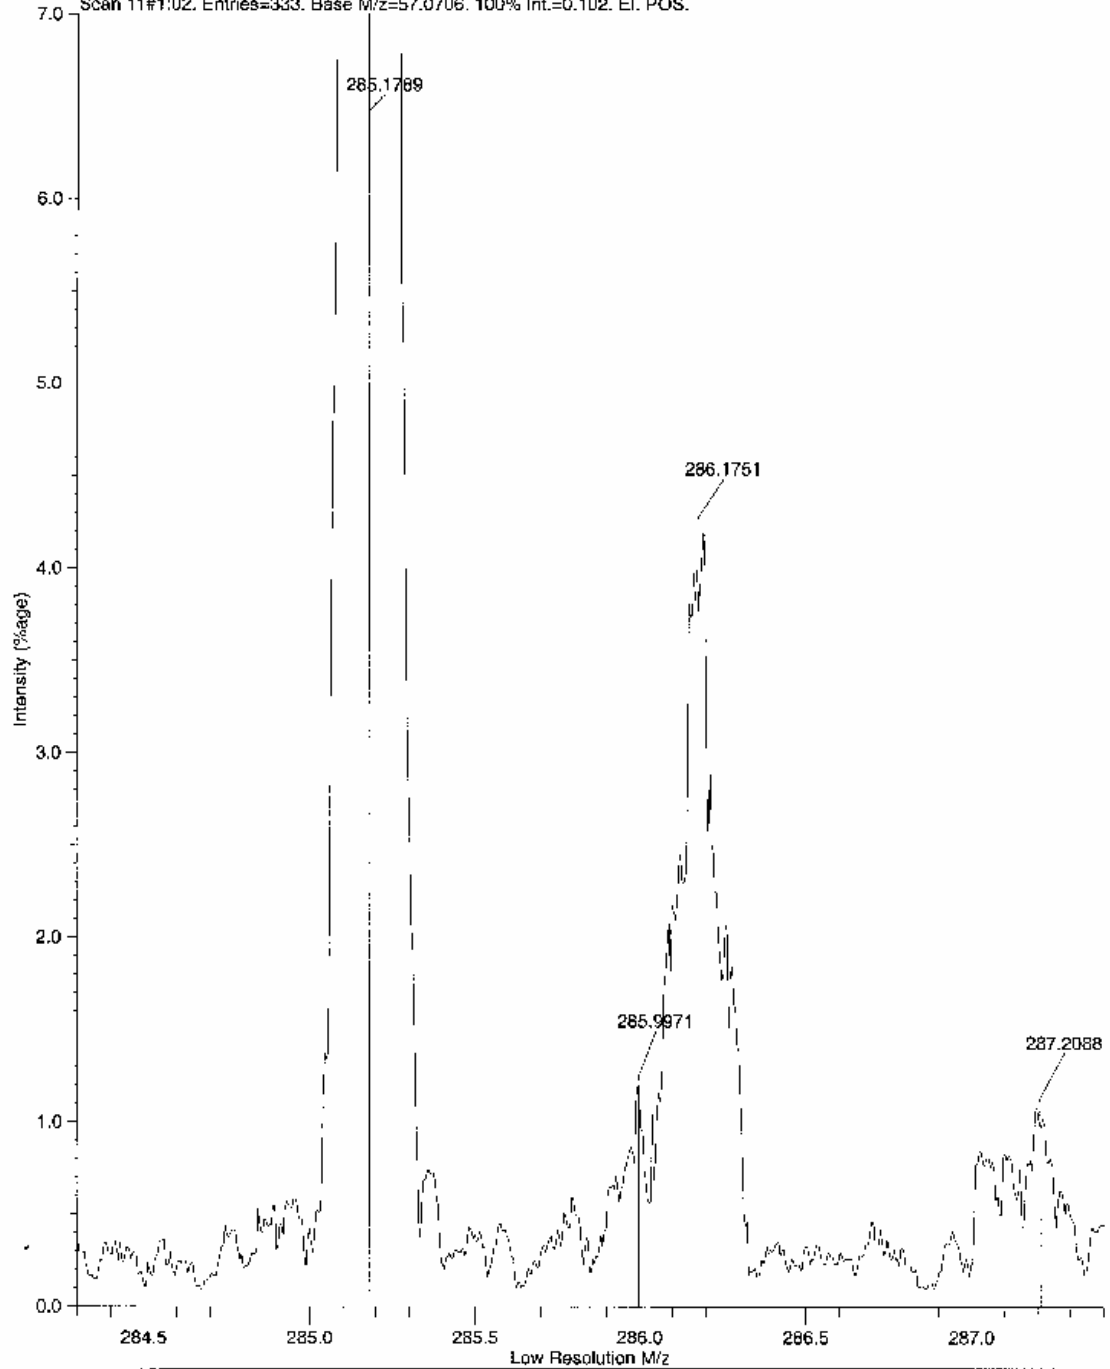

### Compound 7 (ESI)

|                                               | Peak Number | Mass (m/z) | Abundance (%) | FWHM (m/z) | Resolving Power |
|-----------------------------------------------|-------------|------------|---------------|------------|-----------------|
| <b>No. of peaks:</b> 17                       |             |            |               |            |                 |
| <b>Height and Width:</b> From Spectrum Points | 1           | 974.41120  | 2.317         | 0.22628    | 4306            |
| <b>Peak Fit Type:</b> 3-Point Lorentzian      | 2           | 966.21204  | 1.878         | 0.22338    | 4326            |
| <b>Peak Threshold Set:</b> Automatically      | 3           | 964.85891  | 2.179         | 0.11474    | 8409            |
| <b>Min. Peak Width:</b> 3                     | 4           | 953.33493  | 2.058         | 0.09912    | 9618            |
| <b>Search Start:</b> 199.71001 m/z            | 5           | 941.60861  | 1.831         | 0.08256    | 11405           |
| <b>Search Start:</b> 1000.00000 m/z           | 6           | 923.01824  | 4.168         | 0.15944    | 5789            |
| <b>Peak Thresh:</b> 1.80 Relative (%)         | 7           | 912.59381  | 1.865         | 0.22067    | 4136            |
| <b>Noise Thresh:</b> 0.41 Relative (%)        | 8           | 911.00603  | 4.036         | 0.11137    | 8180            |
| <b>Peak S/N:</b> 2.50 (S/N)                   | 9           | 909.99275  | 5.207         | 0.09306    | 9779            |
|                                               | 10          | 908.98173  | 11.929        | 0.10951    | 8301            |
|                                               | 11          | 907.97295  | 7.567         | 0.17726    | 5122            |
|                                               | 12          | 906.96640  | 13.979        | 0.16276    | 5572            |
|                                               | 13          | 896.03991  | 2.382         | 0.11116    | 8061            |
|                                               | 14          | 889.34354  | 1.993         | 0.08824    | 10078           |
|                                               | 15          | 867.53592  | 1.917         | 0.09428    | 9202            |
|                                               | 16          | 837.66892  | 1.894         | 0.07428    | 11278           |
|                                               | 17          | 796.48651  | 1.822         | 0.07480    | 10649           |

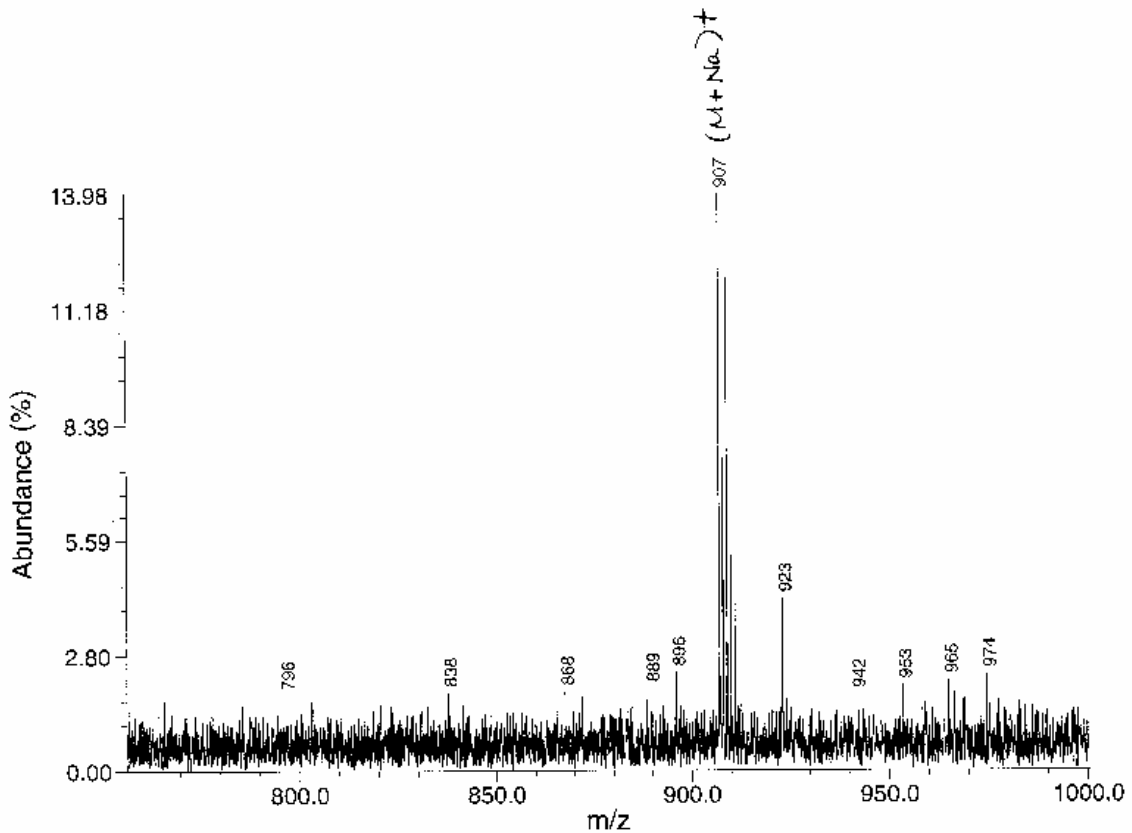

ice\_20

SX-3.pro



### Compound 8 (ESI)

|                                               |  |                    |                   |                      |                   |                        |
|-----------------------------------------------|--|--------------------|-------------------|----------------------|-------------------|------------------------|
| <b>No. of peaks:</b> 31                       |  | <b>Peak Number</b> | <b>Mass (m/z)</b> | <b>Abundance (%)</b> | <b>FWHH (m/z)</b> | <b>Resolving Power</b> |
| <b>Height and Width:</b> From Spectrum Points |  | 1                  | 1186.97803        | 9.930                | 0.63225           | 1877                   |
| <b>Peak Fit Type:</b> Lorentzian              |  | 2                  | 1180.93367        | 7.019                | 1.08626           | 1087                   |
| <b>Peak Threshold Set:</b> Automatically      |  | 3                  | 1158.52290        | 6.484                | 0.51853           | 2234                   |
| <b>Min. Peak Width:</b> 3                     |  | 4                  | 1153.02855        | 6.434                | 0.43776           | 2634                   |
| <b>Search Start:</b> 199.71001 m/z            |  | 5                  | 1145.54922        | 6.927                | 0.60433           | 1896                   |
| <b>Search Start:</b> 1200.00000 m/z           |  | 6                  | 1136.27966        | 7.643                | 0.84634           | 1343                   |
| <b>Peak Thresh:</b> 6.27 Relative (%)         |  | 7                  | 1128.02331        | 10.656               | 0.32164           | 3507                   |
| <b>Noise Thresh:</b> 1.44 Relative (%)        |  | 8                  | 1127.02979        | 19.710               | 0.40276           | 2798                   |
| <b>Peak S/N:</b> 2.50 (S/N)                   |  | 9                  | 1126.06245        | 30.775               | 0.42020           | 2680                   |
|                                               |  | 10                 | 1125.03879        | 59.257               | 0.39504           | 2848                   |
|                                               |  | 11                 | 1124.07490        | 55.133               | 0.36345           | 3093                   |
|                                               |  | 12                 | 1123.03005        | 100.000              | 0.33109           | 3392                   |
|                                               |  | 13                 | 1120.64447        | 10.189               | 0.41254           | 2716                   |
|                                               |  | 14                 | 1116.56449        | 7.466                | 0.61514           | 1815                   |
|                                               |  | 15                 | 1112.73540        | 6.273                | 1.28687           | 865                    |
|                                               |  | 16                 | 1111.47186        | 7.346                | 0.41011           | 2710                   |
|                                               |  | 17                 | 1104.11093        | 6.555                | 0.60999           | 1810                   |
|                                               |  | 18                 | 1101.97111        | 12.378               | 0.41421           | 2660                   |
|                                               |  | 19                 | 1100.20859        | 7.046                | 0.75165           | 1464                   |
|                                               |  | 20                 | 1082.71917        | 7.677                | 0.48813           | 2218                   |
|                                               |  | 21                 | 1051.00447        | 7.556                | 1.17963           | 891                    |
|                                               |  | *22                | *1045.33090       | *8.548               | *0.33256          | *3142                  |

\* additional peaks not listed†

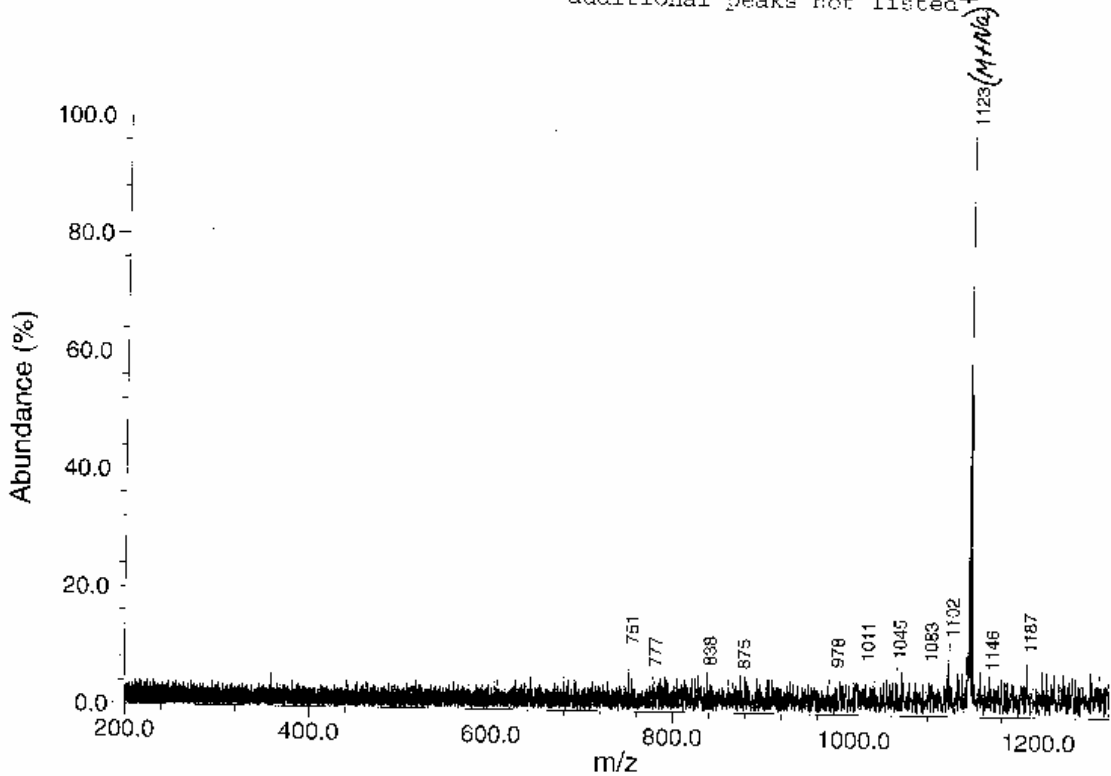

Slice\_20

SX-4-4-1.pro

### Compound 9 (ESI)

|                                        | Peak Number | Mass (m/z)  | Abundance (%) | FWHH (m/z) | Resolution Power |
|----------------------------------------|-------------|-------------|---------------|------------|------------------|
| No. of peaks: 35                       |             |             |               |            |                  |
| Height and Width: From Spectrum Points | 1           | 1097.36316  | 5.547         | 0.43700    | 2511             |
| Peak Fit Type: Lorentzian              | 2           | 1085.06229  | 11.282        | 0.40760    | 2662             |
| Peak Threshold Set: Automatically      | 3           | 1084.03681  | 6.453         | 2.06594    | 525              |
| Min. Peak Width: 3                     | 4           | 1083.60629  | 5.213         | 2.16689    | 500              |
| Search Start: 199.71001 m/z            | 5           | 1083.15119  | 9.868         | 0.47644    | 2273             |
| Search Start: 1100.00000 m/z           | 6           | 1082.67556  | 6.503         | 2.05388    | 527              |
| Peak Thresh: 5.19 Relative (%)         | 7           | 1070.99639  | 5.517         | 0.33680    | 3180             |
| Noise Thresh: 1.19 Relative (%)        | 8           | 1070.07575  | 6.592         | 0.38347    | 2791             |
| Peak S/N: 2.50 (S/N)                   | 9           | 1068.98107  | 8.217         | 0.75774    | 1411             |
|                                        | 10          | 1067.98917  | 12.605        | 0.24555    | 4349             |
|                                        | 11          | 1067.75161  | 6.899         | 1.68847    | 632              |
|                                        | 12          | 1067.39529  | 5.258         | 2.15231    | 496              |
|                                        | 13          | 1066.97859  | 19.188        | 0.23640    | 4514             |
|                                        | 14          | 1066.74429  | 9.326         | 0.63235    | 1687             |
|                                        | 15          | 1057.07389  | 5.600         | 0.24311    | 4348             |
|                                        | 16          | 1055.96088  | 9.326         | 0.62121    | 1700             |
|                                        | 17          | 1055.04603  | 18.173        | 0.31474    | 3352             |
|                                        | 18          | 1054.64617  | 5.384         | 5.44908    | 194              |
|                                        | 19          | 1054.03915  | 22.843        | 0.36739    | 2869             |
|                                        | 20          | 1053.03136  | 40.984        | 0.41052    | 2565             |
|                                        | 21          | 1052.01939  | 38.304        | 0.40164    | 2619             |
|                                        | *22         | *1051.00782 | *76.821       | *0.34714   | *3028            |

\* additional peaks not listed

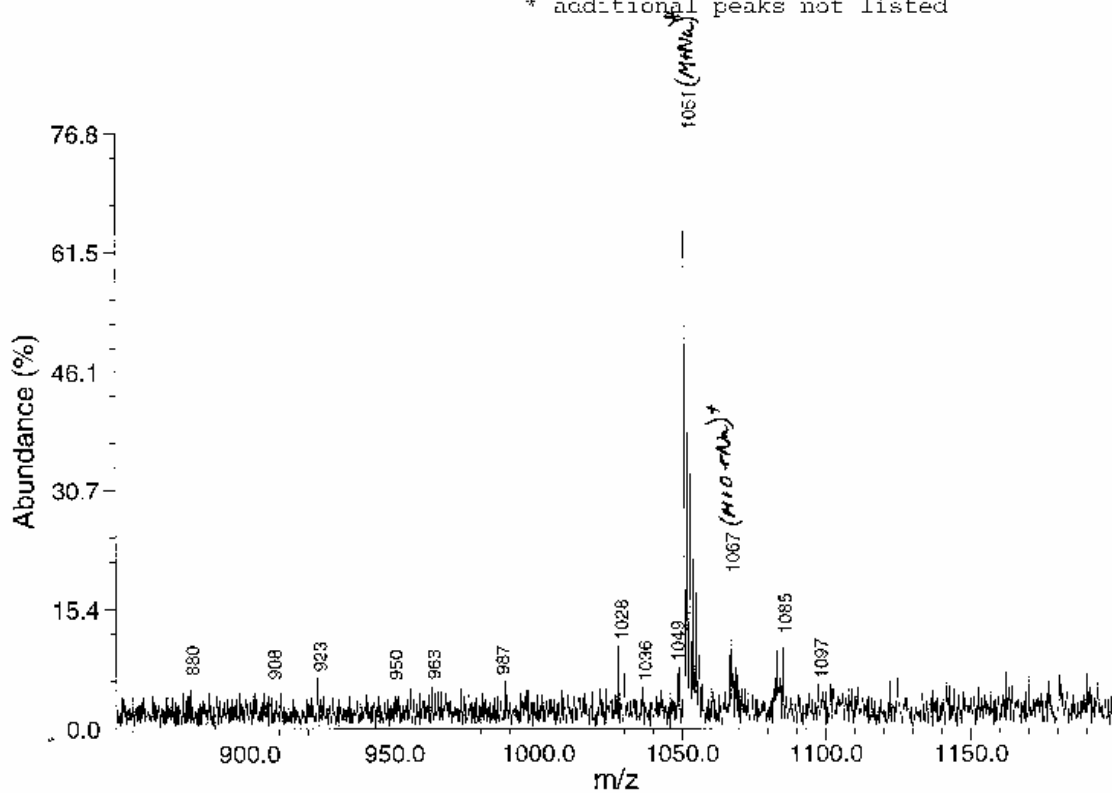

Slice\_20

SX-4-4-2.pro

### Compound 10 (ESI)

| No. of peaks: 73    |                      | Peak Number | Mass (m/z)  | Abundance (%) | FWHM (m/z) | Resolution Power |
|---------------------|----------------------|-------------|-------------|---------------|------------|------------------|
| Height and Width:   | From Spectrum Points | 1           | 1099.89431  | 1.808         | 0.29587    | 3718             |
| Peak Fit Type:      | Lorentzian           | 2           | 1099.55037  | 1.502         | 0.20481    | 5369             |
| Peak Threshold Set: | Automatically        | 3           | 1097.06186  | 1.496         | 0.35882    | 1963             |
| Min. Peak Width:    | 3                    | 4           | 1090.17777  | 1.611         | 0.41709    | 2614             |
| Search Start:       | 199.71001 m/z        | 5           | 1089.64152  | 1.849         | 0.13875    | 7653             |
| Search Start:       | 1100.00000 m/z       | 6           | 1086.98139  | 1.761         | 0.15890    | 6841             |
| Peak Thresh:        | 1.48 Relative (%)    | 7           | 1082.10952  | 1.485         | 0.19818    | 5460             |
| Noise Thresh:       | 0.34 Relative (%)    | 8           | 1075.12215  | 1.809         | 0.34400    | 3125             |
| Peak S/N:           | 2.50 (S/N)           | 9           | 1059.69531  | 1.587         | 0.36476    | 2905             |
|                     |                      | 10          | 1056.27281  | 1.585         | 0.21752    | 4856             |
|                     |                      | 11          | 1045.60899  | 1.479         | 0.14380    | 7271             |
|                     |                      | 12          | 1044.53301  | 1.588         | 0.36019    | 2900             |
|                     |                      | 13          | 1042.64183  | 1.529         | 0.31496    | 3310             |
|                     |                      | 14          | 1040.34648  | 1.752         | 0.31676    | 3284             |
|                     |                      | 15          | 1028.84968  | 1.700         | 0.19062    | 5397             |
|                     |                      | 16          | 1026.67961  | 1.574         | 0.25699    | 3995             |
|                     |                      | 17          | 1025.66930  | 1.576         | 0.17463    | 5873             |
|                     |                      | 18          | 1025.04490  | 1.746         | 0.10863    | 9436             |
|                     |                      | 19          | 1017.80045  | 1.677         | 0.28861    | 3527             |
|                     |                      | 20          | 1017.46763  | 1.629         | 0.19223    | 5293             |
|                     |                      | 21          | 1012.99806  | 2.626         | 0.10575    | 9580             |
|                     |                      | *22         | *1011.59024 | *1.504        | *0.10810   | *9358            |

\* additional peaks not listed

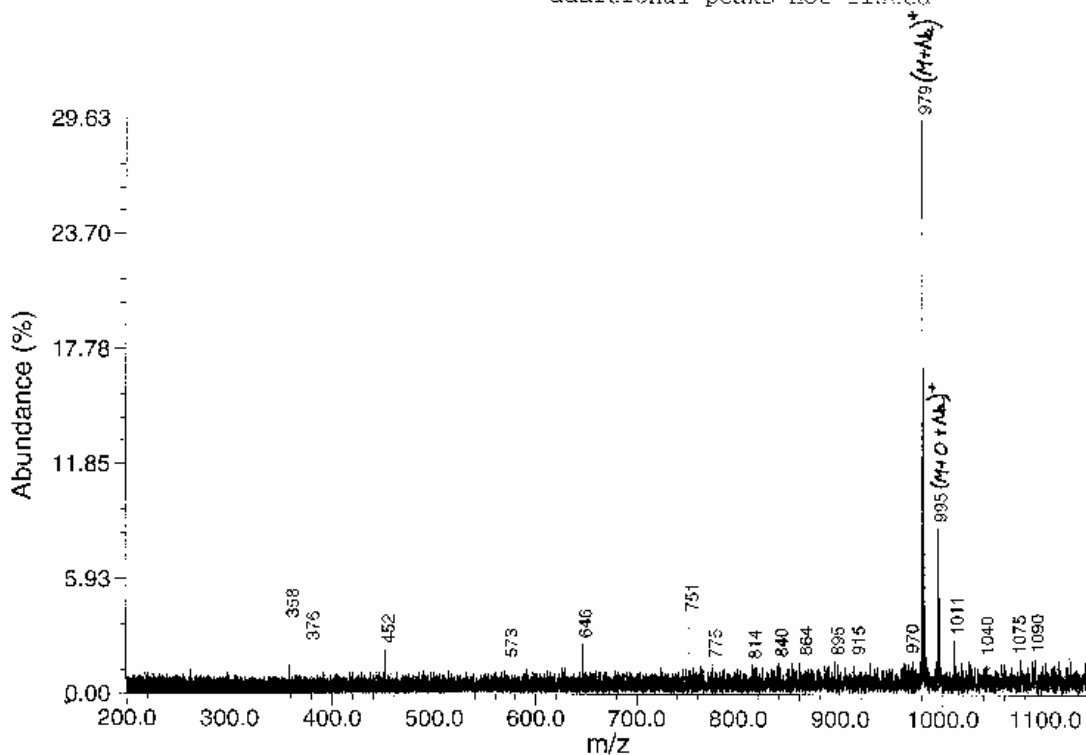

Slice\_20

SX-4-4-3.pro

### Triester radical 1-CO<sub>2</sub>Et without O<sub>2</sub> (ESI)

| No. of peaks: 122                      | Peak<br>Number | Mass<br>(m/z) | Abundance<br>(%) | FWHH<br>(m/z) | Resolving<br>Power |
|----------------------------------------|----------------|---------------|------------------|---------------|--------------------|
| Height and Width: From Spectrum Points | 1              | 1199.25512    | 2.050            | 1.50063       | 799                |
| Peak Fit Type: Lorentzian              | 2              | 1198.52206    | 2.904            | 1.30170       | 921                |
| Peak Threshold Set: Automatically      | 3              | 1197.70554    | 2.383            | 0.50584       | 2368               |
| Min. Peak Width: 3                     | 4              | 1190.16684    | 2.224            | 0.97354       | 1223               |
| Search Start: 99.86000 m/z             | 5              | 1185.71091    | 2.371            | 0.84431       | 1404               |
| Search Start: 1200.00000 m/z           | 6              | 1182.39214    | 2.105            | 1.32427       | 893                |
| Peak Thresh: 1.99 Relative (%)         | 7              | 1181.28624    | 2.006            | 0.61215       | 1930               |
| Noise Thresh: 0.46 Relative (%)        | 8              | 1180.67664    | 2.716            | 0.41880       | 2819               |
| Peak S/N: 2.50 (S/N)                   | 9              | 1179.76873    | 2.020            | 1.11712       | 1056               |
|                                        | 10             | 1172.92283    | 2.149            | 0.62122       | 1888               |
|                                        | 11             | 1170.29007    | 2.153            | 1.41233       | 829                |
|                                        | 12             | 1167.47258    | 2.315            | 0.85067       | 1372               |
|                                        | 13             | 1164.97084    | 2.144            | 0.84165       | 1384               |
|                                        | 14             | 1162.28074    | 2.228            | 0.92659       | 1254               |
|                                        | 15             | 1160.53412    | 2.623            | 0.53039       | 2188               |
|                                        | 16             | 1158.05818    | 5.402            | 0.51629       | 2243               |
|                                        | 17             | 1157.02293    | 9.259            | 0.50770       | 2279               |
|                                        | 18             | 1156.02925    | 8.814            | 0.55545       | 2081               |
|                                        | 19             | 1155.01118    | 11.945           | 0.47317       | 2441               |
|                                        | 20             | 1153.65199    | 2.580            | 1.22278       | 943                |
|                                        | 21             | 1150.52516    | 2.228            | 0.63760       | 1804               |
|                                        | *22            | *1146.70260   | *2.434           | *0.80606      | *1423              |

\* additional peaks not listed

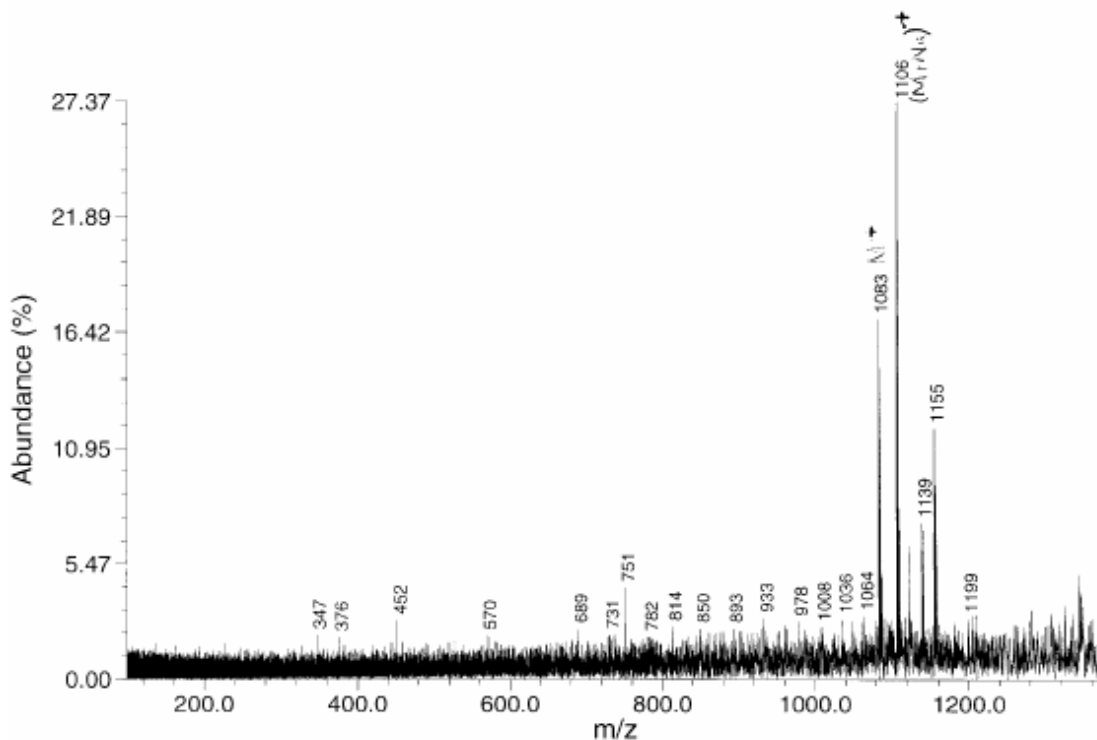

Slice\_20

SX-5-1.pro

### Triester radical 1-CO<sub>2</sub>Et without O<sub>2</sub> (ESI) enlarged spectrum

|                                               | Peak<br>Number                | Mass<br>(m/z) | Abundance<br>(%) | FWHM<br>(m/z) | Resolving<br>Power |
|-----------------------------------------------|-------------------------------|---------------|------------------|---------------|--------------------|
| <b>No. of peaks:</b> 35                       |                               |               |                  |               |                    |
| <b>Height and Width:</b> From Spectrum Points | 1                             | 1131.39752    | 2.304            | 0.56557       | 2000               |
| <b>Peak Fit Type:</b> Lorentzian              | 2                             | 1129.50523    | 2.272            | 0.48096       | 2348               |
| <b>Peak Threshold Set:</b> Automatically      | 3                             | 1126.70600    | 2.065            | 3.37251       | 334                |
| <b>Min. Peak Width:</b> 3                     | 4                             | 1126.01990    | 2.851            | 2.42388       | 465                |
| <b>Search Start:</b> 99.86000 m/z             | 5                             | 1125.04798    | 2.736            | 2.45109       | 459                |
| <b>Search Start:</b> 1200.00000 m/z           | 6                             | 1123.99079    | 2.192            | 3.32583       | 338                |
| <b>Peak Thresh:</b> 1.99 Relative (%)         | 7                             | 1122.91994    | 6.353            | 0.55125       | 2037               |
| <b>Noise Thresh:</b> 0.46 Relative (%)        | 8                             | 1121.97925    | 3.215            | 1.56728       | 716                |
| <b>Peak S/N:</b> 2.50 (S/N)                   | 9                             | 1120.70672    | 1.999            | 0.52258       | 2145               |
|                                               | 10                            | 1117.39540    | 2.966            | 0.54025       | 2068               |
|                                               | 11                            | 1115.35538    | 2.347            | 1.66664       | 669                |
|                                               | 12                            | 1112.04616    | 2.808            | 0.96655       | 1151               |
|                                               | 13                            | 1111.62401    | 2.365            | 1.04057       | 1068               |
|                                               | 14                            | 1110.02921    | 7.119            | 0.44113       | 2516               |
|                                               | 15                            | 1109.00819    | 8.157            | 0.47947       | 2313               |
|                                               | 16                            | 1108.04540    | 20.848           | 0.42866       | 2585               |
|                                               | 17                            | 1107.00473    | 17.220           | 0.41938       | 2640               |
|                                               | 18                            | 1106.02081    | 27.366           | 0.45540       | 2429               |
|                                               | 19                            | 1102.14936    | 2.414            | 0.65232       | 1690               |
|                                               | 20                            | 1100.82387    | 2.077            | 0.71215       | 1546               |
|                                               | 21                            | 1100.05352    | 2.826            | 0.96264       | 1143               |
|                                               | *22                           | *1098.87555   | *2.299           | *0.51298      | *2142              |
|                                               | * additional peaks not listed |               |                  |               |                    |

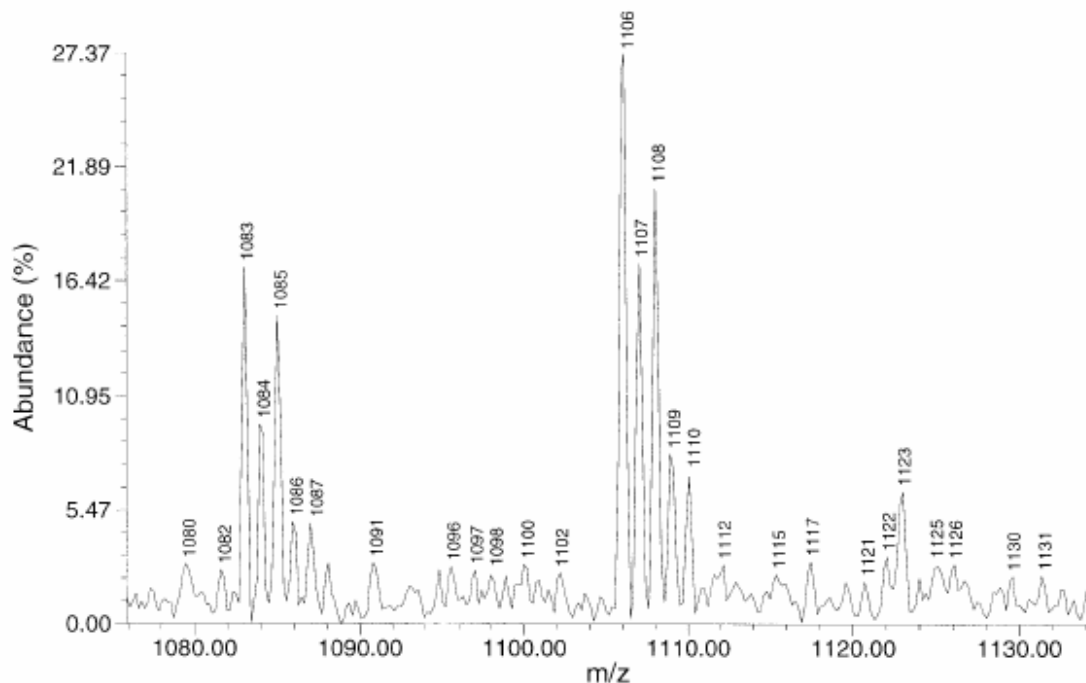

Slice\_20

SX-5-1.pro

### Triester radical 1-CO<sub>2</sub>Et with O<sub>2</sub> (ESI) enlarged spectrum

|                                               | Peak Number | Mass (m/z) | Abundance (%) | FWHM (m/z) | Resolving Power |
|-----------------------------------------------|-------------|------------|---------------|------------|-----------------|
| <b>No. of peaks:</b> 13                       |             |            |               |            |                 |
| <b>Height and Width:</b> From Spectrum Points | 1           | 1124.07015 | 6.075         | 0.55023    | 2043            |
| <b>Peak Fit Type:</b> Lorentzian              | 2           | 1123.05385 | 6.712         | 0.50744    | 2213            |
| <b>Peak Threshold Set:</b> Automatically      | 3           | 1121.99766 | 6.462         | 0.41838    | 2682            |
| <b>Min. Peak Width:</b> 3                     | 4           | 1111.07467 | 8.637         | 0.43601    | 2548            |
| <b>Search Start:</b> 99.86000 m/z             | 5           | 1110.04015 | 22.506        | 0.42635    | 2604            |
| <b>Search Start:</b> 1200.00000 m/z           | 6           | 1109.02775 | 36.164        | 0.44764    | 2478            |
| <b>Peak Thresh:</b> 6.02 Relative (%)         | 7           | 1108.04848 | 73.121        | 0.43716    | 2535            |
| <b>Noise Thresh:</b> 0.79 Relative (%)        | 8           | 1107.03027 | 65.080        | 0.44438    | 2491            |
| <b>Peak S/N:</b> 5.00 (S/N)                   | 9           | 1106.02565 | 100.000       | 0.45643    | 2423            |
|                                               | 10          | 1104.70961 | 7.900         | 0.64932    | 1701            |
|                                               | 11          | 1103.69059 | 14.484        | 0.46467    | 2375            |
|                                               | 12          | 1096.98570 | 7.301         | 0.40460    | 2711            |
|                                               | 13          | 1095.00658 | 7.346         | 0.54830    | 1997            |

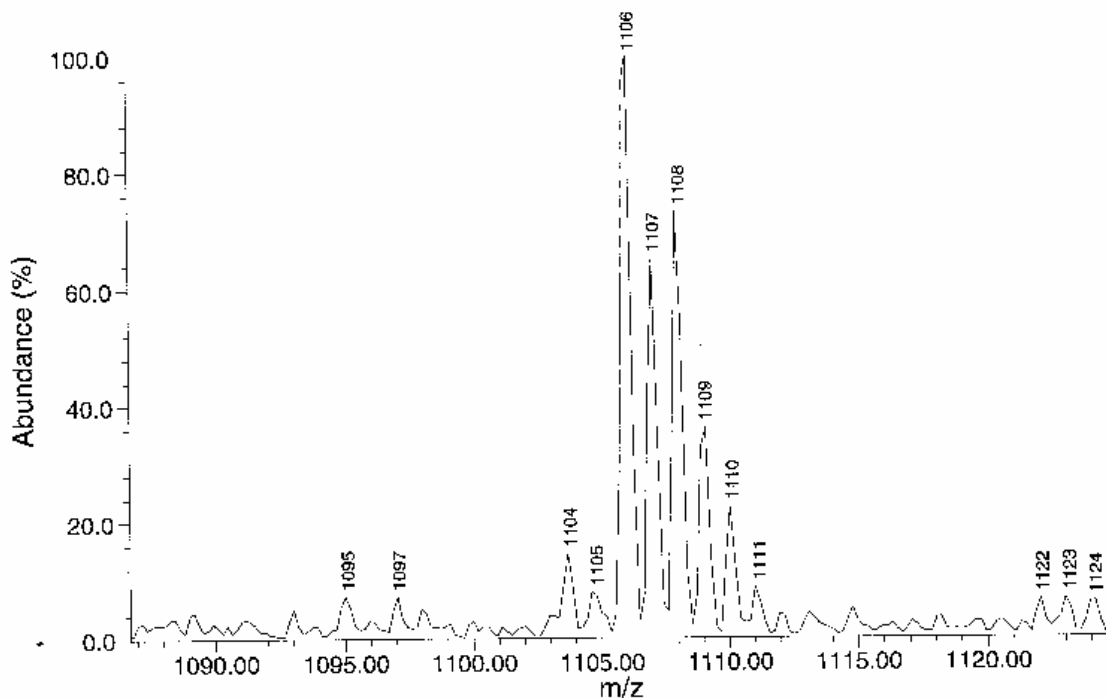

Slide 20

sx-5-1-O2.pro

## Triester radical 1-CO<sub>2</sub>Et with <sup>18</sup>O<sub>2</sub> (ESI) spectrum

|                                               | Peak<br>Number | Mass<br>(m/z) | Abundance<br>(%) | FWHM<br>(m/z) | Resolving<br>Power |
|-----------------------------------------------|----------------|---------------|------------------|---------------|--------------------|
| <b>No. of peaks:</b> 58                       |                |               |                  |               |                    |
| <b>Height and Width:</b> From Spectrum Points | 1              | 1198.15752    | 5.689            | 0.23537       | 5091               |
| <b>Peak Fit Type:</b> 3-Point Quadratic       | 2              | 1194.94140    | 5.698            | 0.21802       | 5481               |
| <b>Peak Threshold Set:</b> Automatically      | 3              | 1183.83926    | 5.753            | 0.17285       | 6849               |
| <b>Min. Peak Width:</b> 2                     | 4              | 1181.05705    | 6.004            | 0.19871       | 5944               |
| <b>Search Start:</b> 199.71001 m/z            | 5              | 1180.08671    | 5.654            | 0.22798       | 5176               |
| <b>Search Start:</b> 1200.00000 m/z           | 6              | 1171.84857    | 6.144            | 0.25856       | 4532               |
| <b>Peak Thresh:</b> 5.50 Relative (%)         | 7              | 1158.99194    | 8.622            | 0.14901       | 7778               |
| <b>Noise Thresh:</b> 1.10 Relative (%)        | 8              | 1157.95081    | 5.635            | 0.23504       | 4927               |
| <b>Peak S/N:</b> 3.00 (S/N)                   | 9              | 1157.02738    | 12.568           | 0.26028       | 4445               |
|                                               | 10             | 1156.03351    | 9.063            | 0.37193       | 3108               |
|                                               | 11             | 1155.02559    | 16.671           | 0.30853       | 3744               |
|                                               | 12             | 1143.19495    | 5.886            | 0.44798       | 2552               |
|                                               | 13             | 1143.00847    | 9.063            | 0.15914       | 7182               |
|                                               | 14             | 1142.07308    | 8.769            | 0.47647       | 2397               |
|                                               | 15             | 1141.94984    | 9.306            | 0.45021       | 2536               |
|                                               | 16             | 1141.02966    | 18.734           | 0.35773       | 3190               |
|                                               | 17             | 1140.02537    | 16.246           | 0.18345       | 6214               |
|                                               | 18             | 1139.86438    | 8.207            | 0.60044       | 1898               |
|                                               | 19             | 1139.02588    | 32.327           | 0.22009       | 5175               |
|                                               | 20             | 1129.61361    | 5.504            | 0.20919       | 5400               |
|                                               | 21             | 1124.99737    | 6.457            | 0.45122       | 2493               |
|                                               | *22            | *1123.96386   | *9.376           | *0.40508      | *2775              |

\* additional peaks not listed

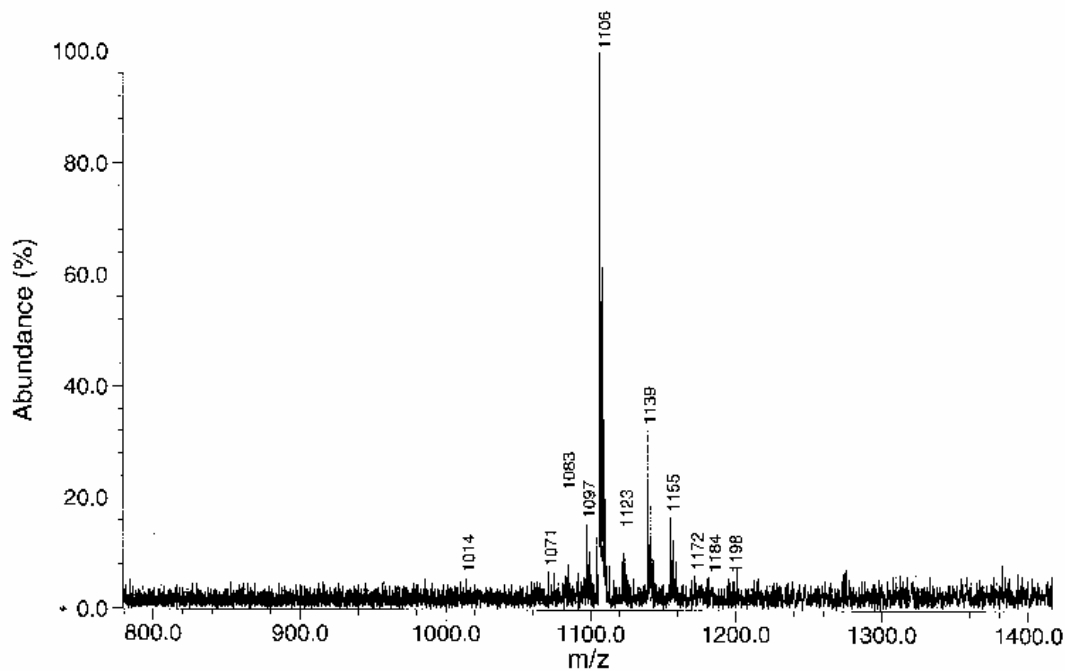

Slice\_20

SX-5-1-O18.pro

### Diester radical 2-CO<sub>2</sub>Et without O<sub>2</sub> (ESI)

| No. of peaks: 11    |                      | Peak Number | Mass (m/z) | Abundance (%) | FWHH (m/z) | Resolving Power |
|---------------------|----------------------|-------------|------------|---------------|------------|-----------------|
| Height and Width:   | From Spectrum Points | 1           | 1082.99920 | 10.866        | 0.19302    | 5611            |
| Peak Fit Type:      | Lorentzian           | 2           | 1069.00764 | 11.695        | 0.19842    | 5388            |
| Peak Threshold Set: | Automatically        | 3           | 1066.97563 | 15.025        | 0.19144    | 5574            |
| Min. Peak Width:    | 3                    | 4           | 1049.99333 | 13.623        | 0.21163    | 4961            |
| Search Start:       | 199.71001 m/z        | 5           | 1038.00374 | 18.885        | 0.19597    | 5297            |
| Search Start:       | 1100.00000 m/z       | 6           | 1037.01090 | 34.468        | 0.16241    | 6385            |
| Peak Thresh:        | 10.62 Relative (%)   | 7           | 1035.97883 | 72.591        | 0.15389    | 6732            |
| Noise Thresh:       | 1.38 Relative (%)    | 8           | 1034.99812 | 62.687        | 0.14853    | 6968            |
| Peak S/N:           | 5.00 (S/N)           | 9           | 1034.00046 | 100.000       | 0.16692    | 6195            |
|                     |                      | 10          | 1013.00398 | 10.961        | 0.13165    | 7695            |
|                     |                      | 11          | 1011.00321 | 19.127        | 0.12644    | 7996            |

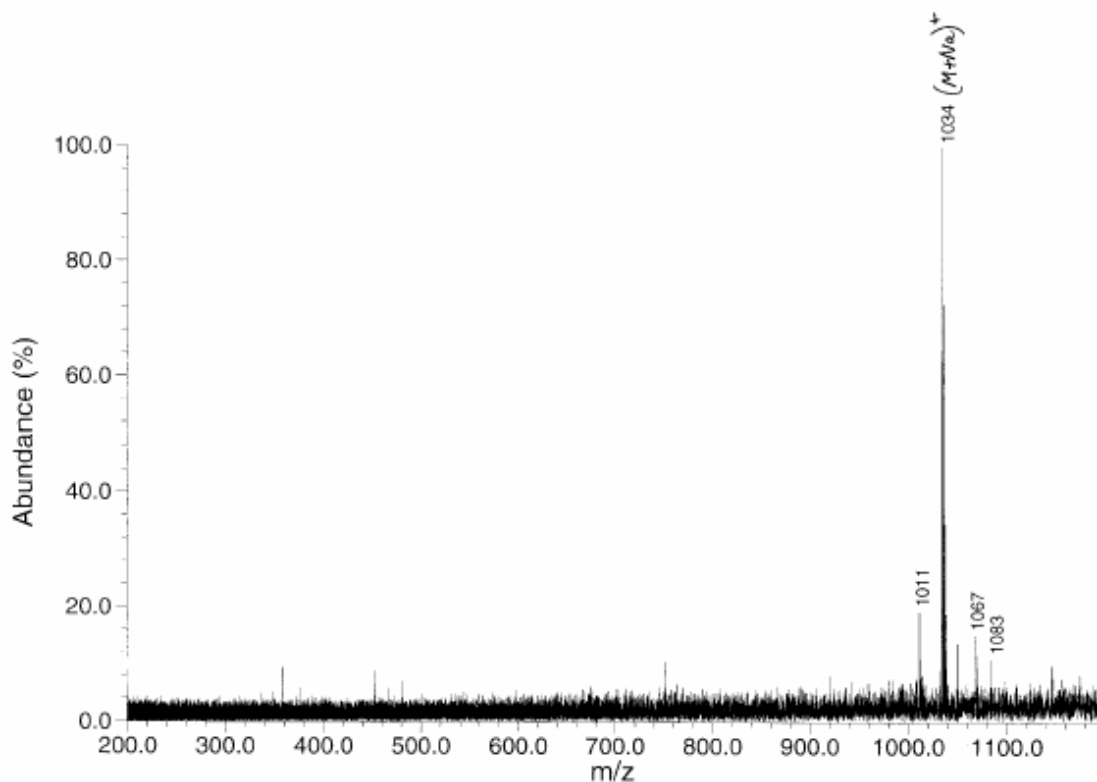

Slice\_20

SX-5-2.pro



## Diester radical 2-CO<sub>2</sub>Et without O<sub>2</sub> (ESI) enlarged spectrum

|                                        | Peak Number | Mass (m/z) | Abundance (%) | FWHH (m/z) | Resolving Power |
|----------------------------------------|-------------|------------|---------------|------------|-----------------|
| No. of peaks: 10                       |             |            |               |            |                 |
| Height and Width: From Spectrum Points | 1           | 1069.00764 | 11.695        | 0.19842    | 5388            |
| Peak Fit Type: Lorentzian              | 2           | 1066.97563 | 15.025        | 0.19144    | 5574            |
| Peak Threshold Set: Automatically      | 3           | 1049.99333 | 13.623        | 0.21163    | 4961            |
| Min. Peak Width: 3                     | 4           | 1038.00374 | 18.885        | 0.19597    | 5297            |
| Search Start: 199.71001 m/z            | 5           | 1037.01090 | 34.468        | 0.16241    | 6385            |
| Search Start: 1100.00000 m/z           | 6           | 1035.97883 | 72.591        | 0.15389    | 6732            |
| Peak Thresh: 10.62 Relative (%)        | 7           | 1034.99812 | 62.687        | 0.14853    | 6968            |
| Noise Thresh: 1.38 Relative (%)        | 8           | 1034.00046 | 100.000       | 0.16692    | 6195            |
| Peak S/N: 5.00 (S/N)                   | 9           | 1013.00398 | 10.961        | 0.13165    | 7695            |
|                                        | 10          | 1011.00321 | 19.127        | 0.12644    | 7996            |

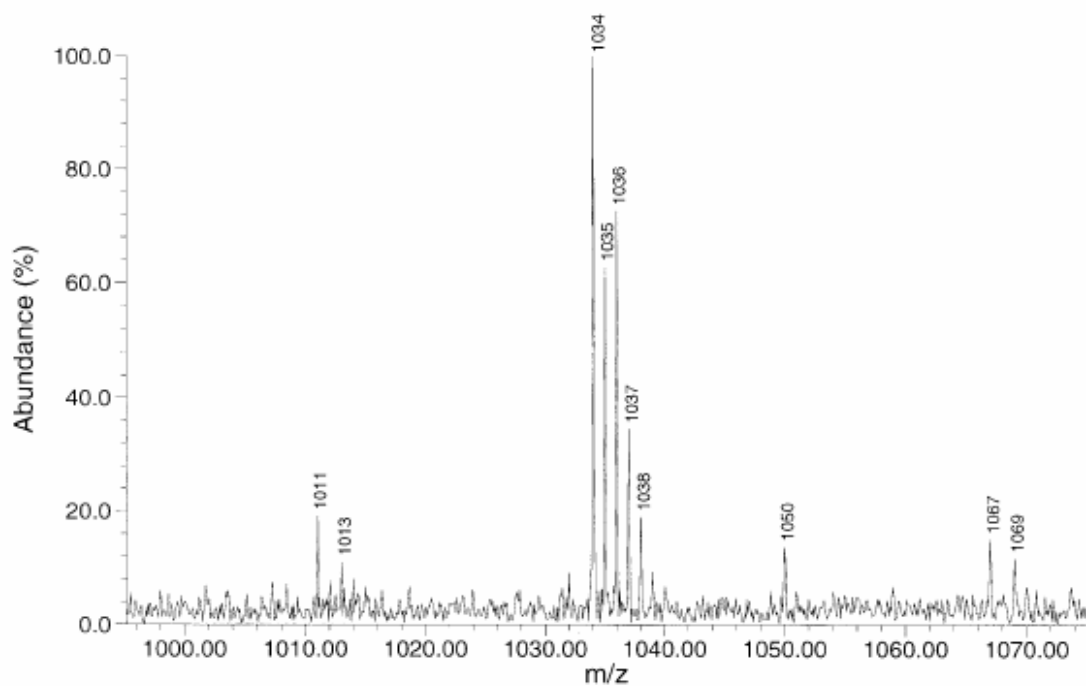

Slice\_20

SX-5-2.pro

## Diester radical 2-CO<sub>2</sub>Et with O<sub>2</sub> (ESI) spectrum

| No. of peaks: 19                       |  | Peak Number | Mass (m/z) | Abundance (%) | FWHH (m/z) | Resolving Power |
|----------------------------------------|--|-------------|------------|---------------|------------|-----------------|
| Height and Width: From Spectrum Points |  | 1           | 1068.96601 | 9.291         | 0.68280    | 1566            |
| Peak Fit Type: 3-Point Quadratic       |  | 2           | 1067.97312 | 5.702         | 0.41345    | 2583            |
| Peak Threshold Set: Automatically      |  | 3           | 1067.04653 | 10.157        | 0.47005    | 2270            |
| Min. Peak Width: 3                     |  | 4           | 1052.04130 | 7.218         | 0.54420    | 1933            |
| Search Start: 99.86000 m/z             |  | 5           | 1050.99901 | 8.488         | 0.49665    | 2116            |
| Search Start: 1100.00000 m/z           |  | 6           | 1049.98768 | 6.224         | 0.36504    | 2876            |
| Peak Threshold: 5.58 Relative (%)      |  | 7           | 1039.97209 | 5.790         | 0.36711    | 2833            |
| Noise Thresh: 0.73 Relative (%)        |  | 8           | 1039.02371 | 8.998         | 0.44988    | 2310            |
| Peak S/N: 5.00 (S/N)                   |  | 9           | 1037.99694 | 21.568        | 0.42164    | 2462            |
|                                        |  | 10          | 1036.99514 | 32.380        | 0.45594    | 2274            |
|                                        |  | 11          | 1035.99629 | 65.250        | 0.44099    | 2349            |
|                                        |  | 12          | 1035.00988 | 53.732        | 0.44412    | 2330            |
|                                        |  | 13          | 1033.99991 | 100.000       | 0.45607    | 2267            |
|                                        |  | 14          | 1031.94814 | 10.353        | 0.46128    | 2237            |
|                                        |  | 15          | 1014.99014 | 6.480         | 0.41071    | 2471            |
|                                        |  | 16          | 1014.01690 | 6.420         | 1.68864    | 600             |
|                                        |  | 17          | 1013.04252 | 15.886        | 0.51420    | 1970            |
|                                        |  | 18          | 1011.98998 | 12.338        | 0.45271    | 2235            |
|                                        |  | 19          | 1011.03032 | 21.373        | 0.46334    | 2162            |

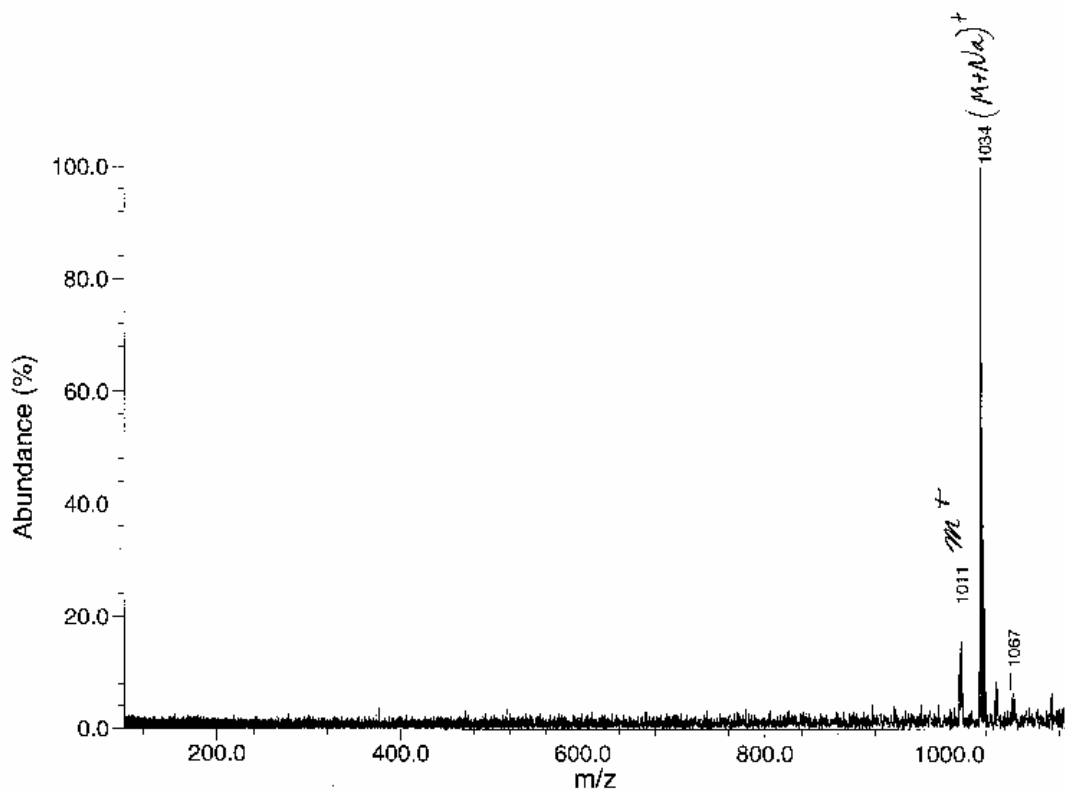

Slice\_20

sx-5-2-O2.pro

## Diester radical 2-CO<sub>2</sub>Et with O<sub>2</sub> (ESI) enlarged spectrum

|                                               | Peak<br>Number | Mass<br>(m/z) | Abundance<br>(%) | FWHH<br>(m/z) | Resolving<br>Power |
|-----------------------------------------------|----------------|---------------|------------------|---------------|--------------------|
| <b>No. of peaks:</b> 8                        | 1              | 1039.97209    | 5.790            | 0.36711       | 2833               |
| <b>Height and Width:</b> From Spectrum Points | 2              | 1039.02371    | 8.998            | 0.44988       | 2310               |
| <b>Peak Fit Type:</b> 3-Point Quadratic       | 3              | 1037.99694    | 21.568           | 0.42164       | 2462               |
| <b>Peak Threshold Set:</b> Automatically      | 4              | 1036.99514    | 32.380           | 0.45594       | 2274               |
| <b>Min. Peak Width:</b> 3                     | 5              | 1035.99629    | 65.250           | 0.44099       | 2349               |
| <b>Search Start:</b> 99.86000 m/z             | 6              | 1035.00988    | 53.732           | 0.44412       | 2330               |
| <b>Search Start:</b> 1100.00000 m/z           | 7              | 1033.99991    | 100.000          | 0.45607       | 2267               |
| <b>Peak Thresh:</b> 5.58 Relative (%)         | 8              | 1031.94814    | 10.353           | 0.46128       | 2237               |
| <b>Noise Thresh:</b> 0.73 Relative (%)        |                |               |                  |               |                    |
| <b>Peak S/N:</b> 5.00 (S/N)                   |                |               |                  |               |                    |

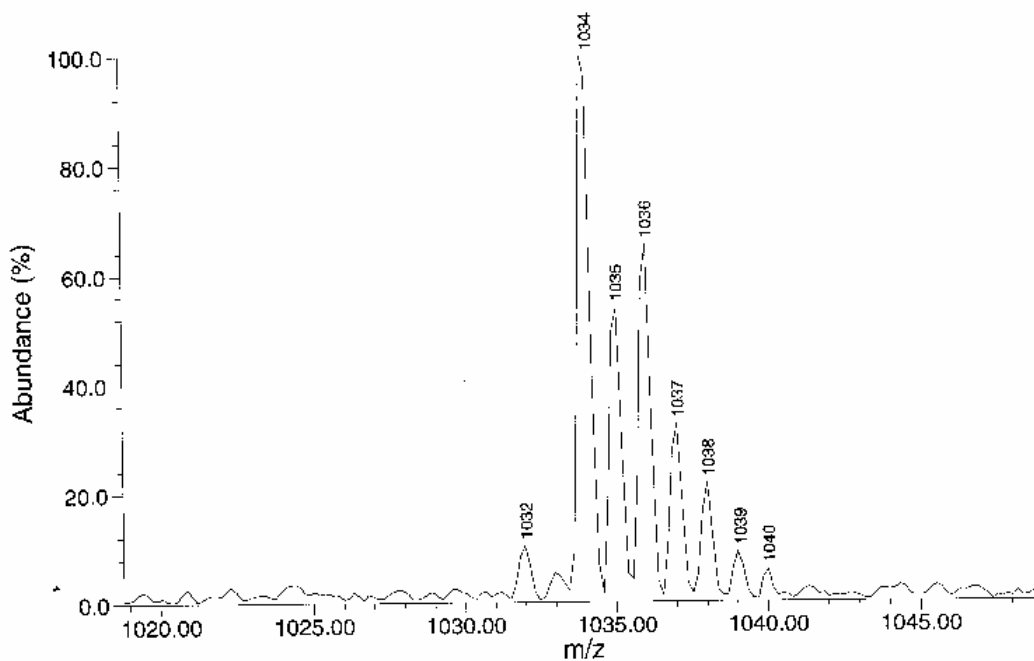

Slice\_20

sx-5-2-O2.pro

### Monoester radical 3-CO<sub>2</sub>Et without O<sub>2</sub> (ESI)

|                                        | Peak Number | Mass (m/z) | Abundance (%) | FWHH (m/z) | Resolving Power |
|----------------------------------------|-------------|------------|---------------|------------|-----------------|
| No. of peaks: 15                       |             |            |               |            |                 |
| Height and Width: From Spectrum Points | 1           | 996.97647  | 11.700        | 0.17466    | 5708            |
| Peak Fit Type: 3-Point Quadratic       | 2           | 995.96963  | 10.697        | 0.15246    | 6532            |
| Peak Threshold Set: Automatically      | 3           | 994.97352  | 17.568        | 0.14211    | 7001            |
| Min. Peak Width: 3                     | 4           | 979.93454  | 9.695         | 0.17105    | 5729            |
| Search Start: 199.71001 m/z            | 5           | 978.95570  | 15.738        | 0.16924    | 5784            |
| Search Start: 1200.00000 m/z           | 6           | 977.96524  | 13.641        | 0.20439    | 4785            |
| Peak Thresh: 9.36 Relative (%)         | 7           | 976.98240  | 14.582        | 0.19236    | 5079            |
| Noise Thresh: 1.22 Relative (%)        | 8           | 965.95703  | 19.103        | 0.15831    | 6102            |
| Peak S/N: 5.00 (S/N)                   | 9           | 964.96642  | 28.046        | 0.14683    | 6572            |
|                                        | 10          | 963.97185  | 60.566        | 0.12885    | 7481            |
|                                        | 11          | 962.98079  | 55.748        | 0.11255    | 8556            |
|                                        | 12          | 961.98135  | 100.000       | 0.13164    | 7308            |
|                                        | 13          | 940.99693  | 10.622        | 0.16739    | 5622            |
|                                        | 14          | 940.01085  | 12.165        | 0.13652    | 6886            |
|                                        | 15          | 938.99476  | 16.569        | 0.14202    | 6612            |

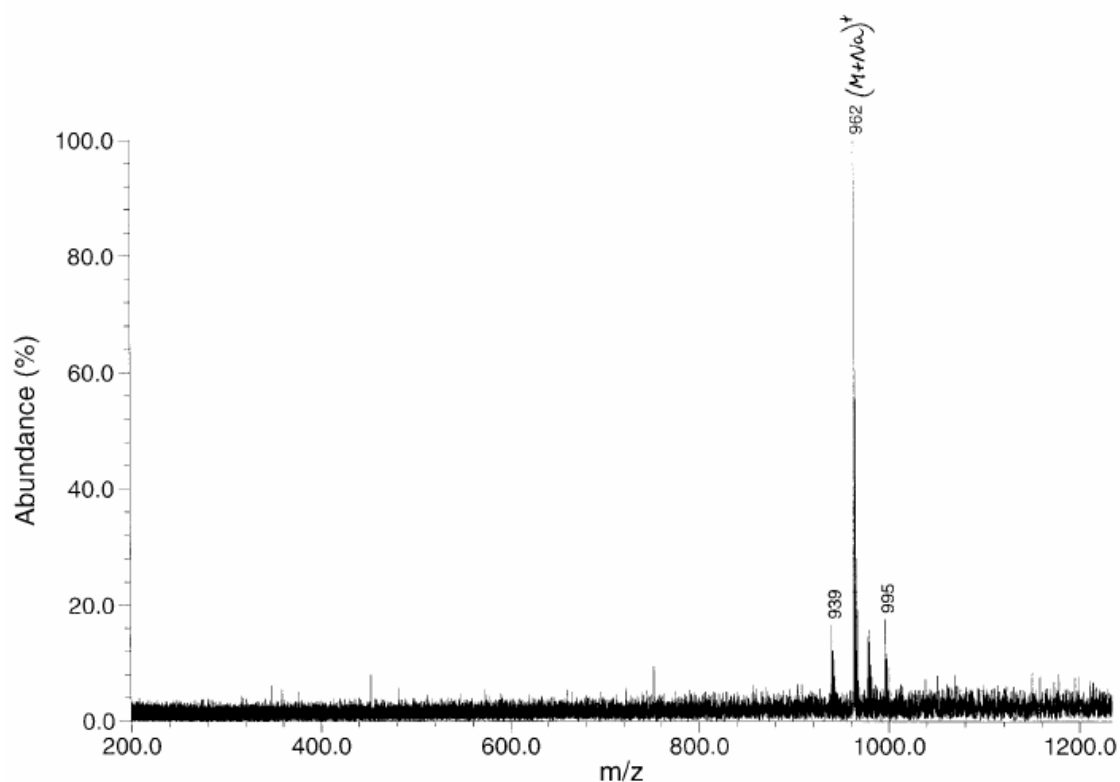

Slice\_20

SX-5-3.pro

### Monoester radical 3-CO<sub>2</sub>Et without O<sub>2</sub> (ESI) enlarged spectrum

|                                        | Peak Number | Mass (m/z) | Abundance (%) | FWHH (m/z) | Resolving Power |
|----------------------------------------|-------------|------------|---------------|------------|-----------------|
| No. of peaks: 15                       |             |            |               |            |                 |
| Height and Width: From Spectrum Points | 1           | 996.97647  | 11.700        | 0.17466    | 5708            |
| Peak Fit Type: 3-Point Quadratic       | 2           | 995.96963  | 10.697        | 0.15246    | 6532            |
| Peak Threshold Set: Automatically      | 3           | 994.97352  | 17.568        | 0.14211    | 7001            |
| Min. Peak Width: 3                     | 4           | 979.93454  | 9.695         | 0.17105    | 5729            |
| Search Start: 199.71001 m/z            | 5           | 978.95570  | 15.738        | 0.16924    | 5784            |
| Search Start: 1200.00000 m/z           | 6           | 977.96524  | 13.641        | 0.20439    | 4785            |
| Peak Thresh: 9.36 Relative (%)         | 7           | 976.98240  | 14.582        | 0.19236    | 5079            |
| Noise Thresh: 1.22 Relative (%)        | 8           | 965.95703  | 19.103        | 0.15831    | 6102            |
| Peak S/N: 5.00 (S/N)                   | 9           | 964.96642  | 28.046        | 0.14683    | 6572            |
|                                        | 10          | 963.97185  | 60.566        | 0.12885    | 7481            |
|                                        | 11          | 962.98079  | 55.748        | 0.11255    | 8556            |
|                                        | 12          | 961.98135  | 100.000       | 0.13164    | 7308            |
|                                        | 13          | 940.99693  | 10.622        | 0.16739    | 5622            |
|                                        | 14          | 940.01085  | 12.165        | 0.13652    | 6886            |
|                                        | 15          | 938.99476  | 16.569        | 0.14202    | 6612            |

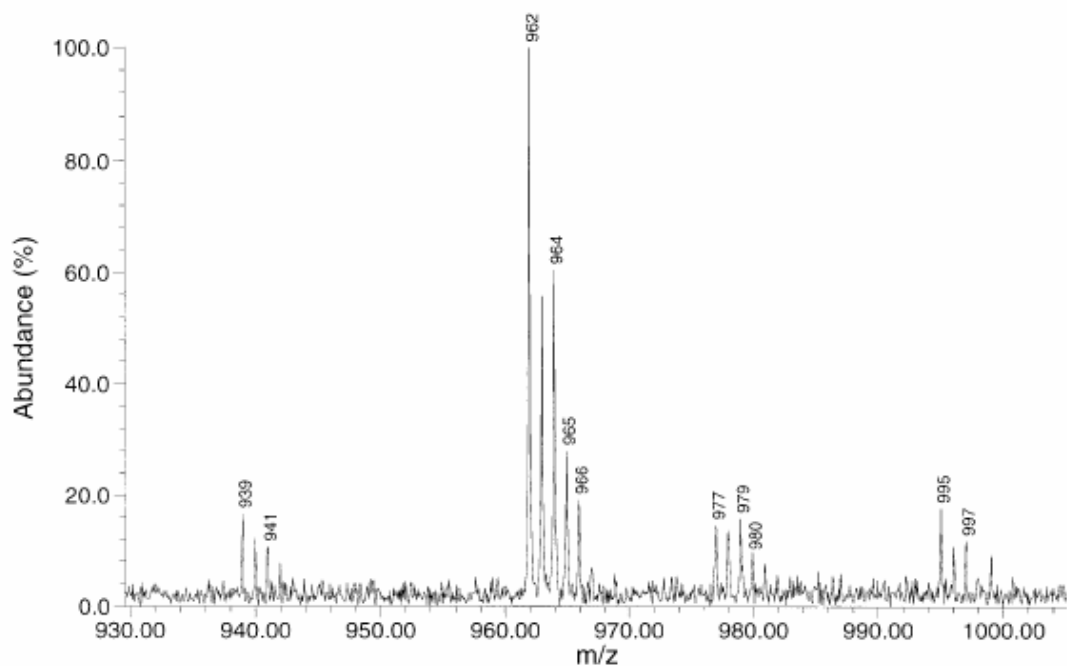

Slice\_20

SX-5-3.pro

### Monoester radical 3-CO<sub>2</sub>Et with O<sub>2</sub> (ESI) enlarged spectrum

|                                        | Peak Number | Mass (m/z) | Abundance (%) | FWHH (m/z) | Resolving Power |
|----------------------------------------|-------------|------------|---------------|------------|-----------------|
| No. of peaks: 4                        |             |            |               |            |                 |
| Height and Width: From Spectrum Points | 1           | 964.98815  | 13.141        | 0.38203    | 2526            |
| Peak Fit Type: 3-Point Quadratic       | 2           | 963.99099  | 25.086        | 0.36827    | 2618            |
| Peak Threshold Set: Automatically      | 3           | 963.00085  | 27.021        | 0.36026    | 2673            |
| Min. Peak Width: 3                     | 4           | 961.98294  | 48.090        | 0.36091    | 2665            |
| Search Start: 99.86000 m/z             |             |            |               |            |                 |
| Search Stop: 1050.00000 m/z            |             |            |               |            |                 |
| Peak Thresh: 10.56 Relative (%)        |             |            |               |            |                 |
| Noise Thresh: 1.36 Relative (%)        |             |            |               |            |                 |
| Peak S/N: 5.00 (S/N)                   |             |            |               |            |                 |

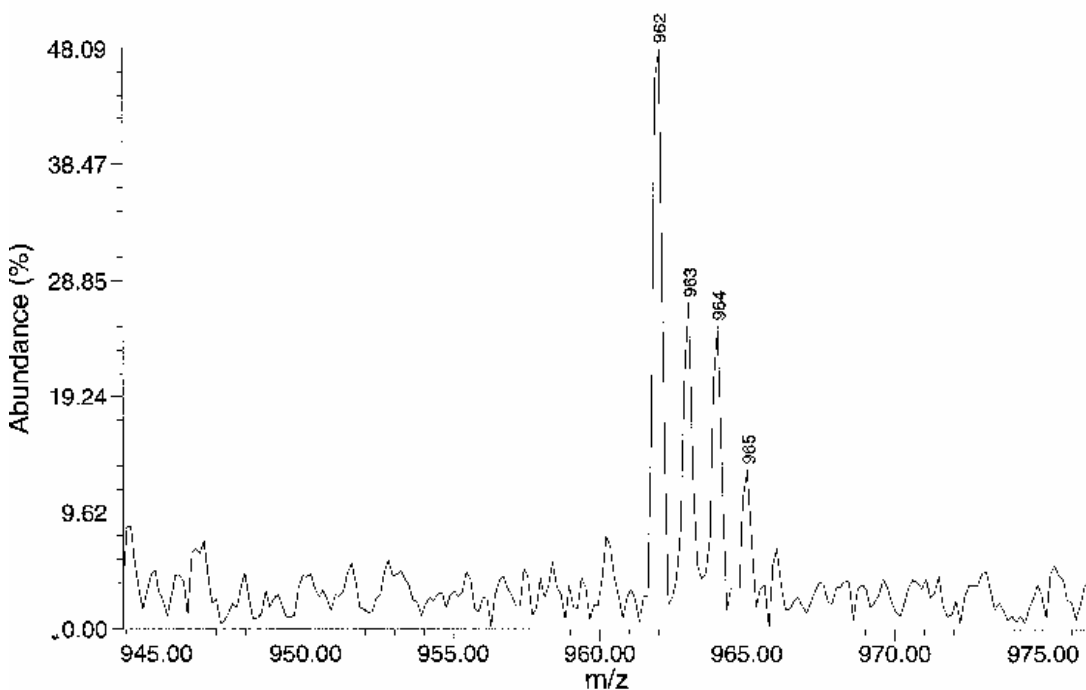

Slice\_20

sx-5-3-O2.pro

## Tri-salt radical 1-CO<sub>2</sub>Na without O<sub>2</sub> (MALDI) spectrum

D:\DATA\MALDI\Oct 05\M111504 SX-6-1

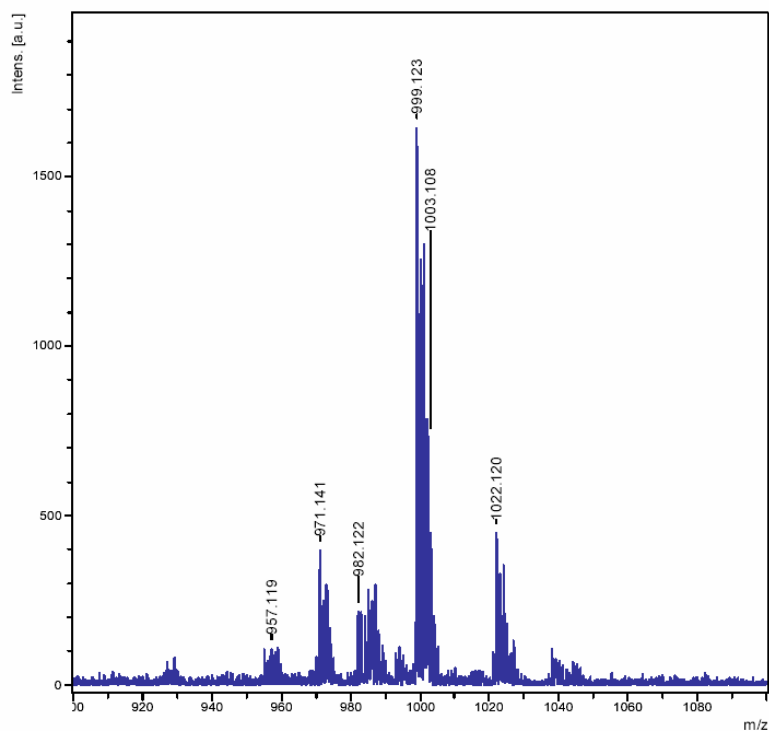

| m/z      | SN    | Quality Fac. | Res. | Intens. | Area |
|----------|-------|--------------|------|---------|------|
| 957.119  | 7.0   | 160          | 2014 | 83.13   | 94   |
| 971.141  | 34.5  | 2463         | 3594 | 409.26  | 200  |
| 973.150  | 16.8  | 1026         | 3339 | 198.78  | 101  |
| 982.122  | 19.0  | 220          | 4365 | 226.04  | 94   |
| 985.120  | 17.9  | 245          | 3627 | 210.93  | 136  |
| 987.096  | 9.2   | 447          | 1202 | 108.50  | 165  |
| 999.123  | 144.7 | 1514         | 3865 | 1699.17 | 835  |
| 1001.116 | 78.0  | 1407         | 3804 | 914.24  | 528  |
| 1003.108 | 14.6  | 175          | 5160 | 171.44  | 87   |
| 1022.120 | 24.9  | 543          | 4656 | 289.01  | 180  |
| 1023.660 | 8.2   | 125          | 2624 | 95.40   | 48   |
| 1024.135 | 16.2  | 293          | 5113 | 188.19  | 90   |

## Tri-salt radical 1-CO<sub>2</sub>Na with O<sub>2</sub> (MALDI) spectrum

D:\DATA\MALDI\Oct 05\M101405\9477 SX-6-1-O2

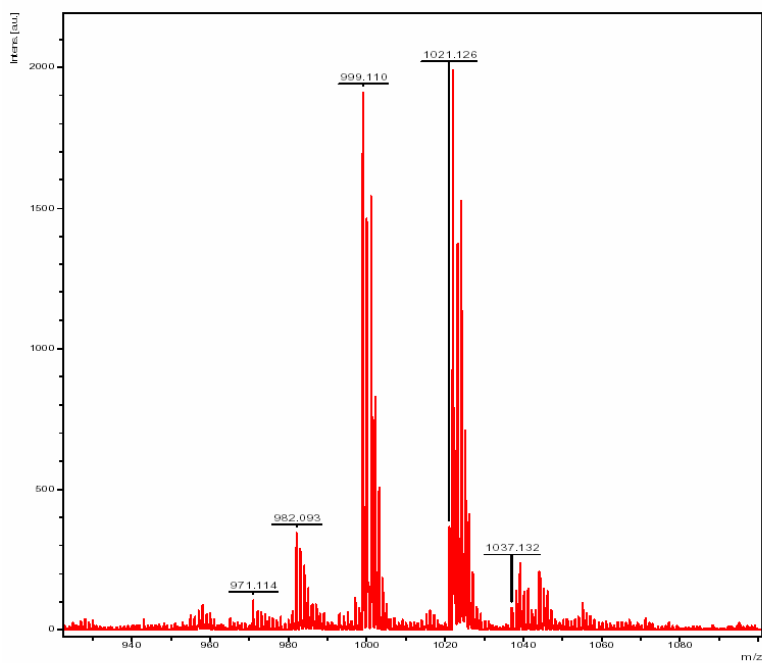

| m/z      | SN    | Quality Fac. | Res.  | Intens. | Area |
|----------|-------|--------------|-------|---------|------|
| 971.114  | 10.0  | 256          | 5503  | 100.73  | 35   |
| 982.093  | 33.6  | 723          | 5637  | 376.80  | 127  |
| 999.110  | 163.4 | 15809        | 4784  | 2092.17 | 888  |
| 1021.126 | 114.9 | 21405        | 5651  | 368.00  | 82   |
| 1037.132 | 24.0  | 4786         | 12475 | 77.00   | 12   |

10/14/2005 09:26:27 AM

# (M+15) residue of monoester 3-CO<sub>2</sub>Et decomposition (ESI) spectrum

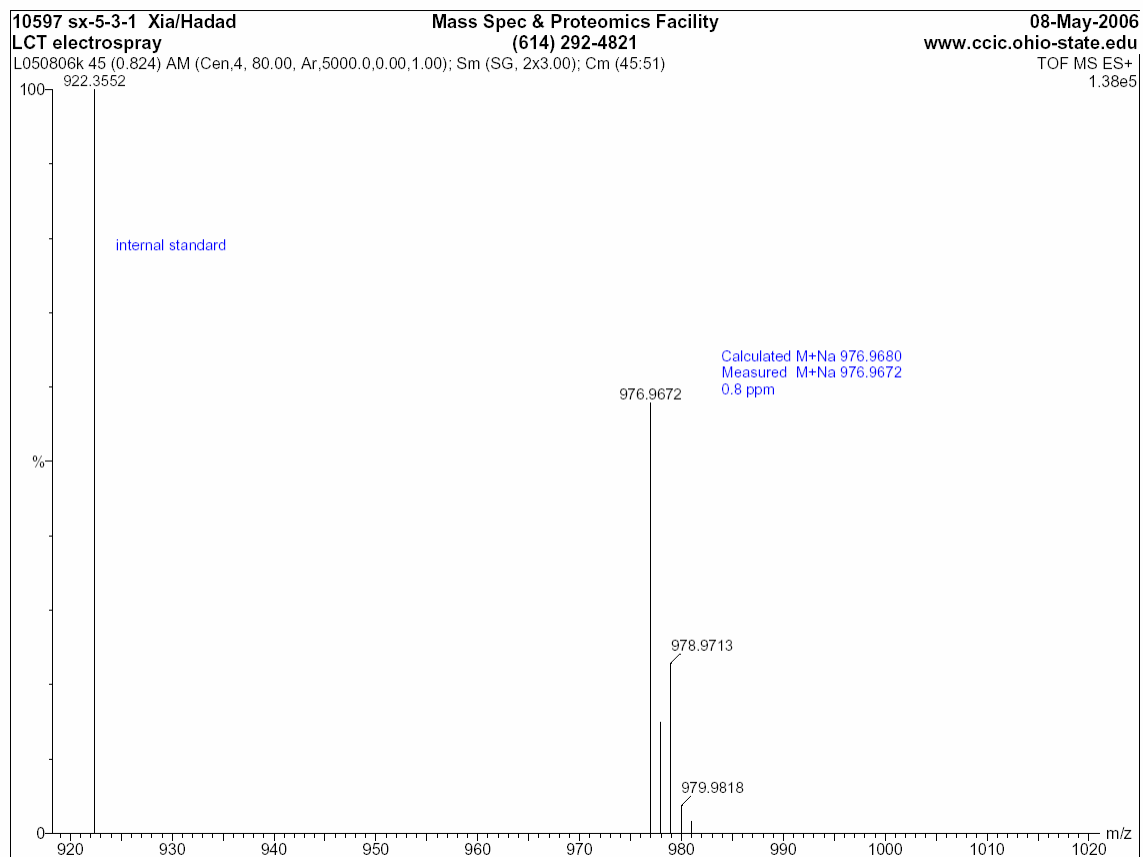



# M residue of monoester 3-CO<sub>2</sub>Et decomposition (ESI) spectrum

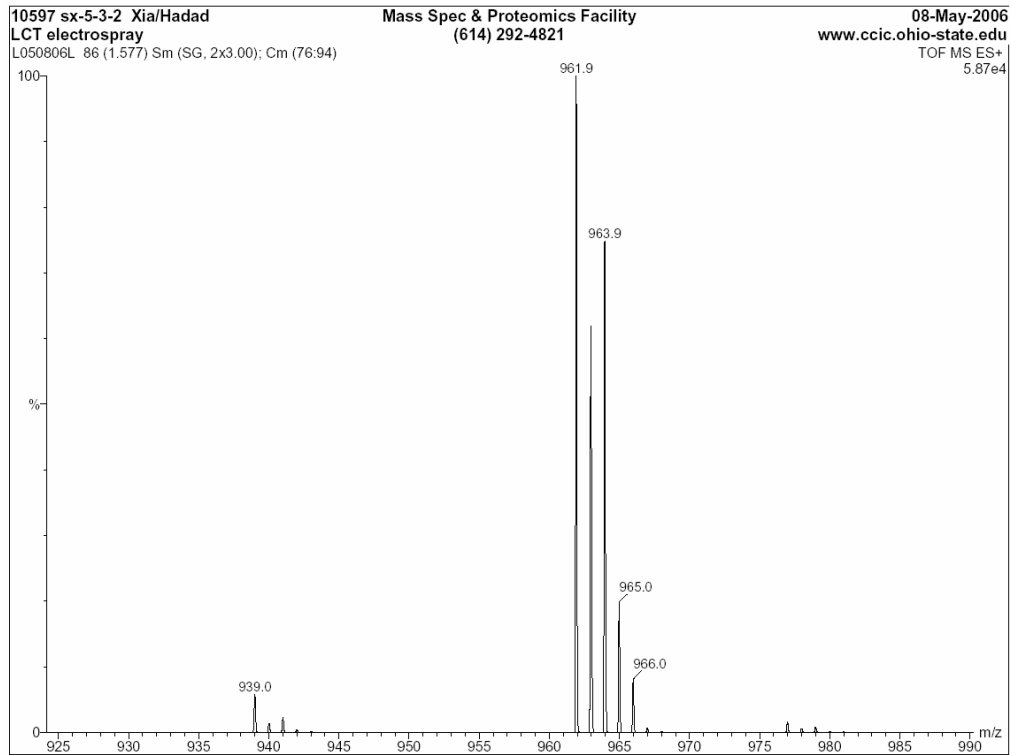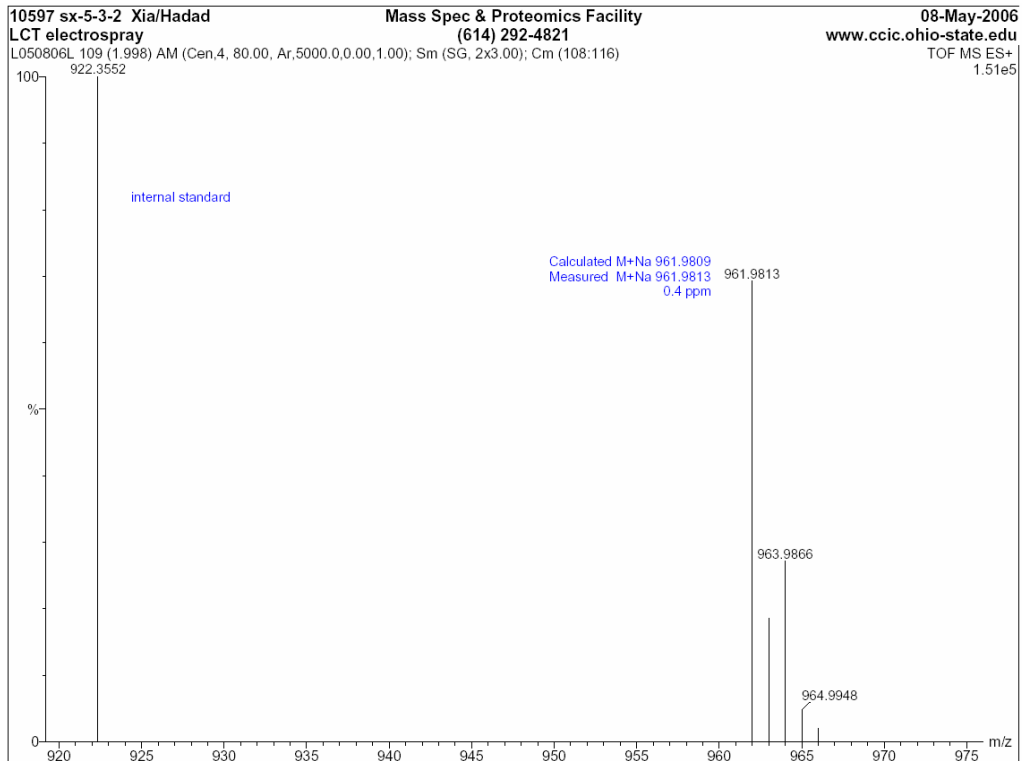

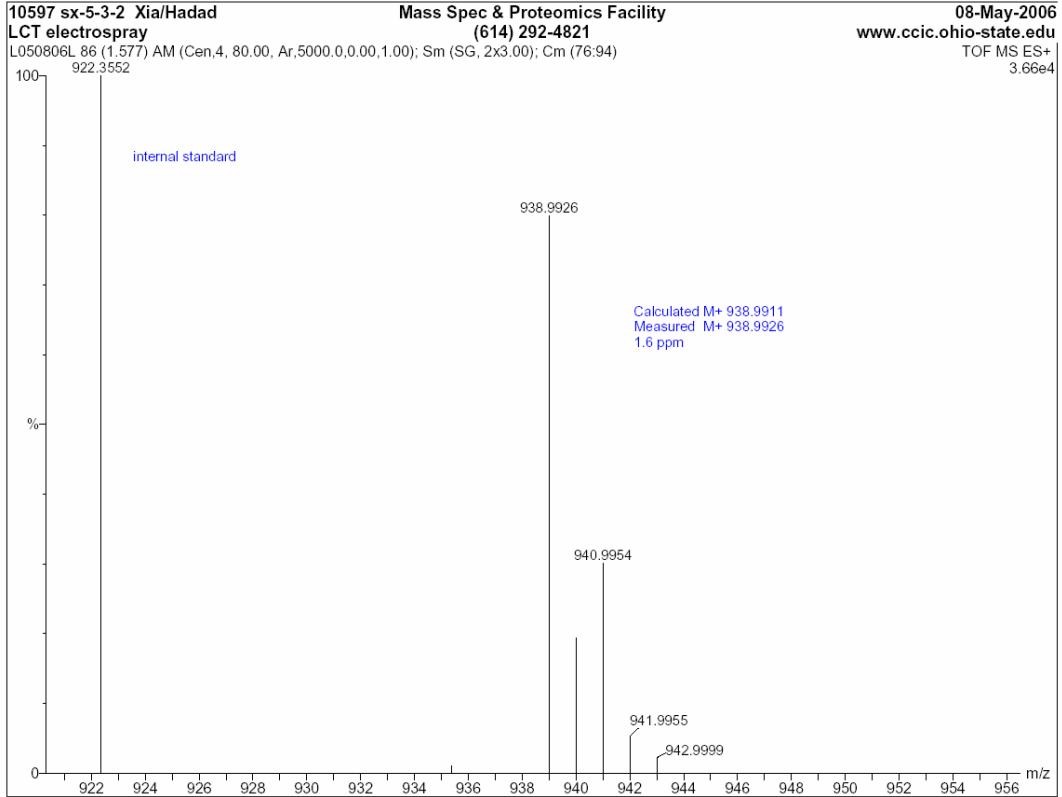

**(M+Na+15), (M+Na+16), (M+Na+17)**

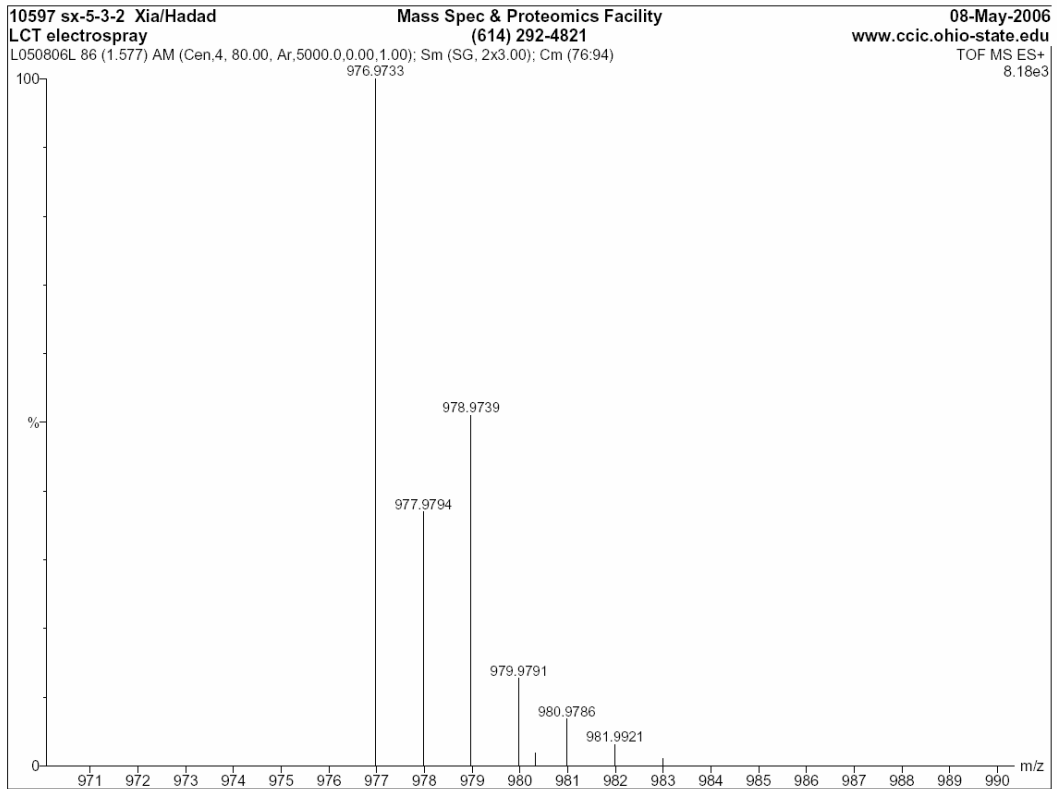

# (M+15) residue of monoester 2-CO<sub>2</sub>Et decomposition (ESI) spectrum

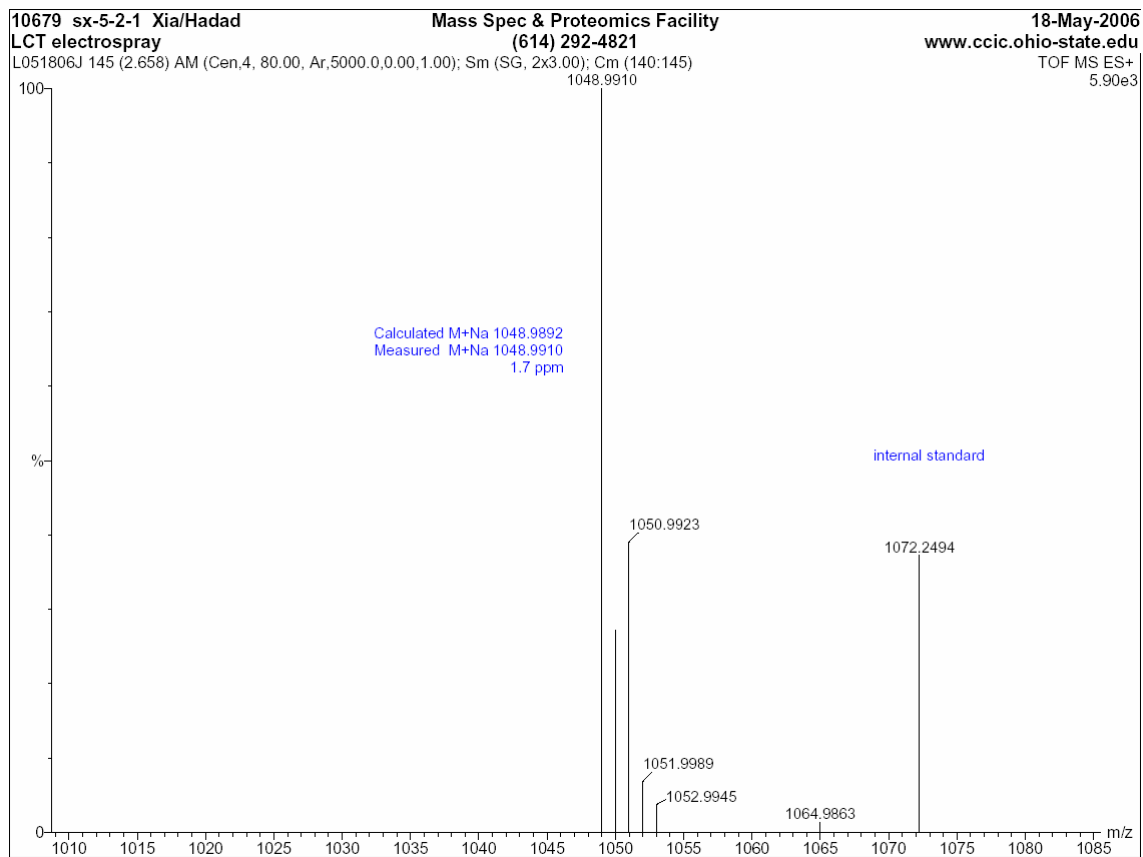

# M residue of monoester 2-CO<sub>2</sub>Et decomposition (ESI) spectrum

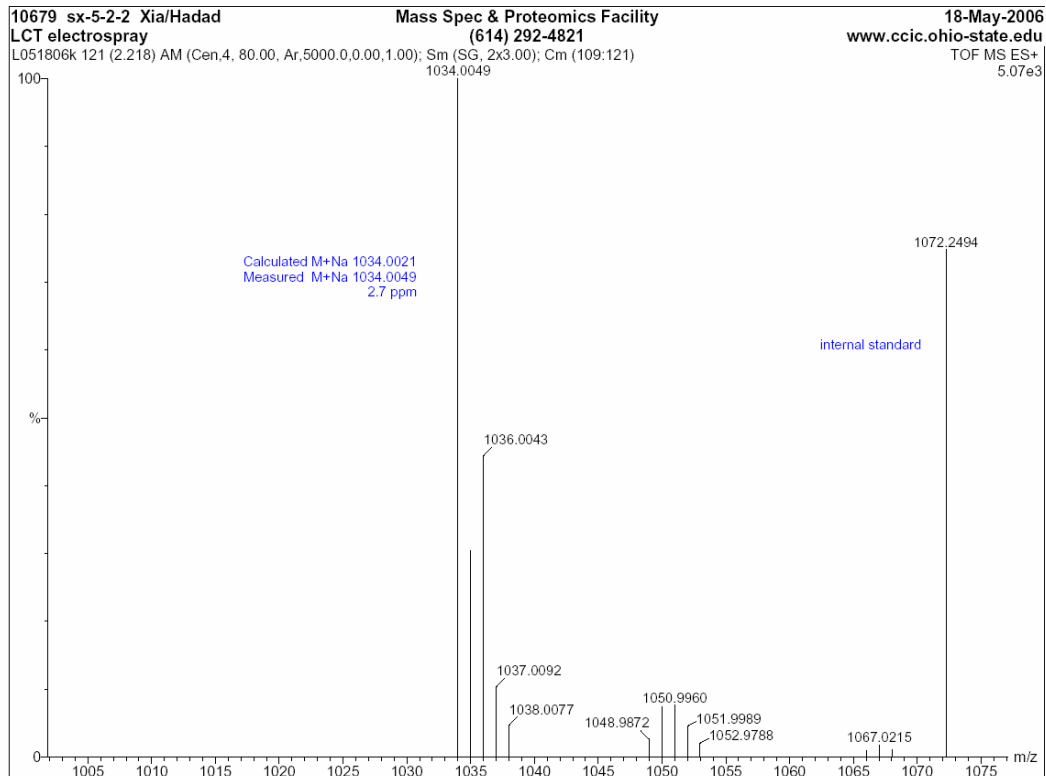

## (M+Na+15), (M+Na+16), (M+Na+17), (M+Na+32), (M+Na+33)

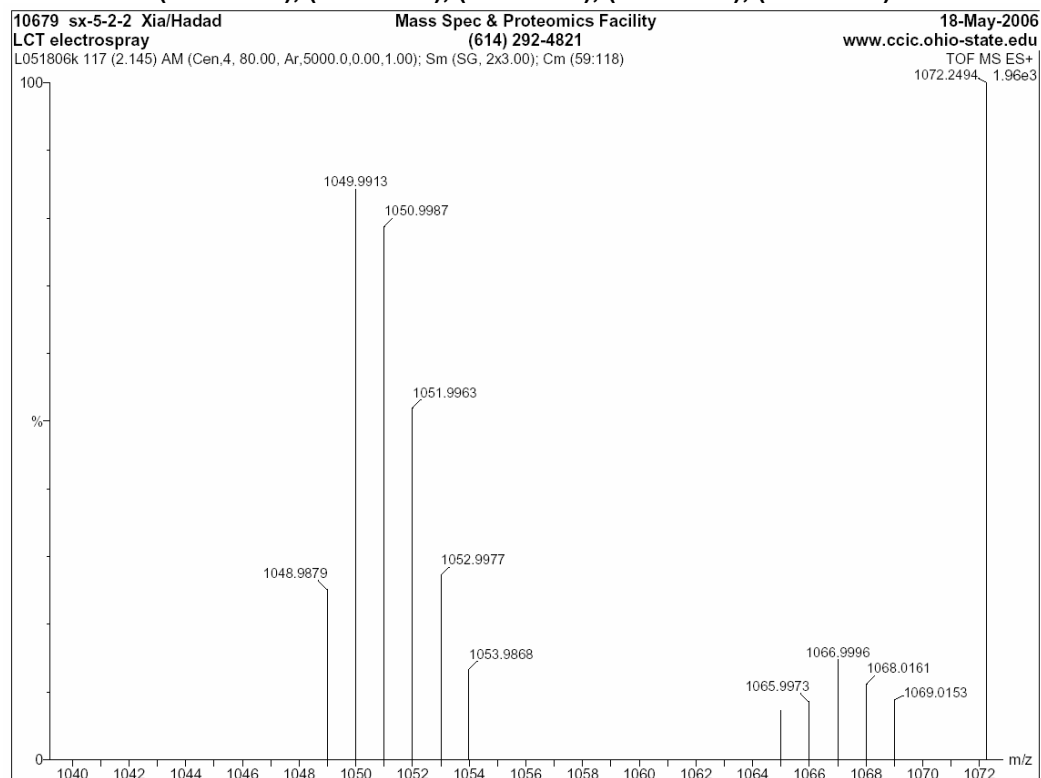

# NMR spectra Compound 5 <sup>1</sup>H NMR

SpinWorks 2.4:

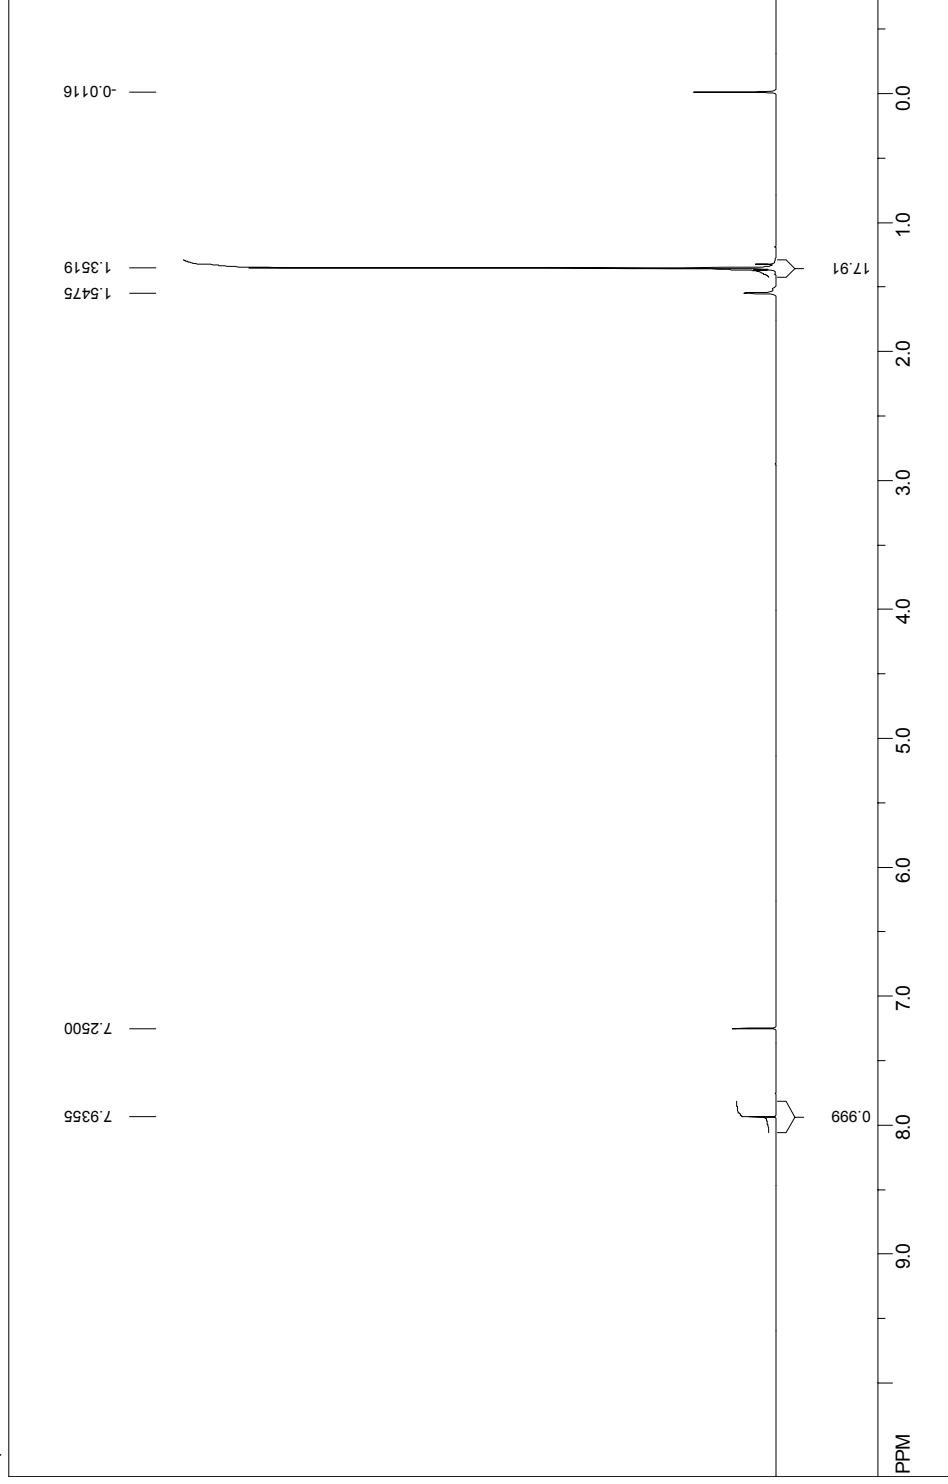

file: U:\research\paper\data\mm1-8-09-04\1\fid exp1 <zg30>  
transmitter freq: 400.132471 MHz  
time domain size: 32768 points  
width: 8278.15 Hz = 20.688513 ppm = 0.252629 Hz/pt  
number of scans: 16

freq. of 0 ppm: 400.130013 MHz  
processed size: 16384 complex points  
LB: 0.300 GB: 0.0000

# Compound 5 <sup>13</sup>C NMR

SpinWorks 2.4:

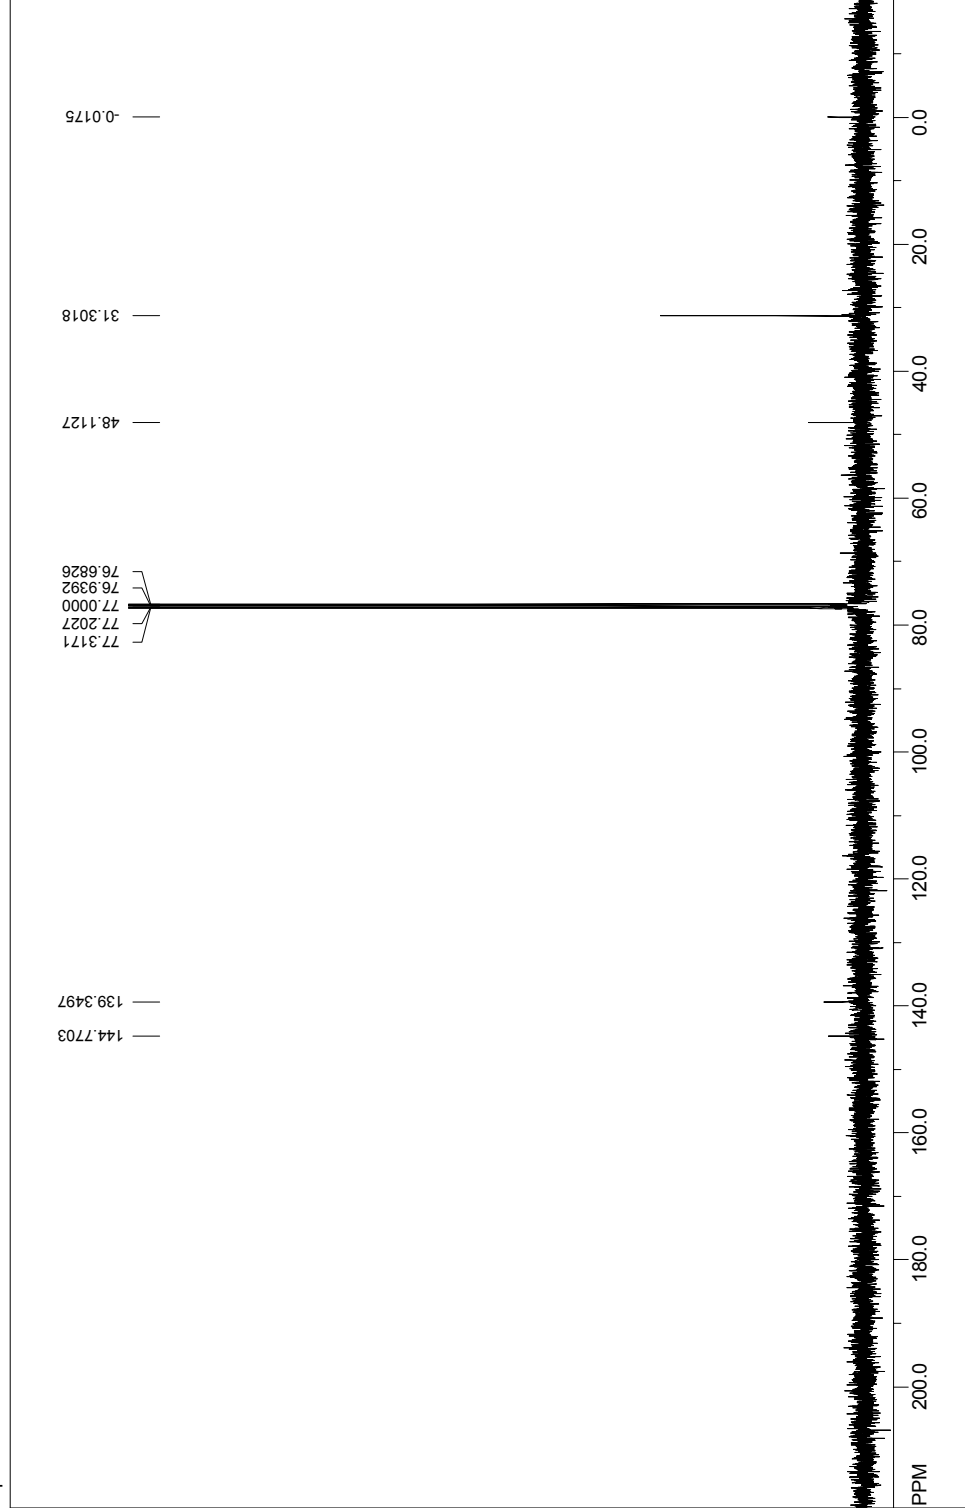

file: U:\research\paper\data\nmr\1-8-09-04\21fd exp: <2jg3Q>  
transmitter freq.: 100.622800 MHz  
time domain size: 65536 points  
width: 23880.82 Hz = 238.323802 ppm = 0.365918 Hz/pt  
number of scans: 100

freq. of 0 ppm: 100.612768 MHz  
processed size: 32768 complex points  
LB: 1.000 GB: 0.0000

# Compound 6 <sup>1</sup>H NMR

SpinWorks 2.4: proton-3

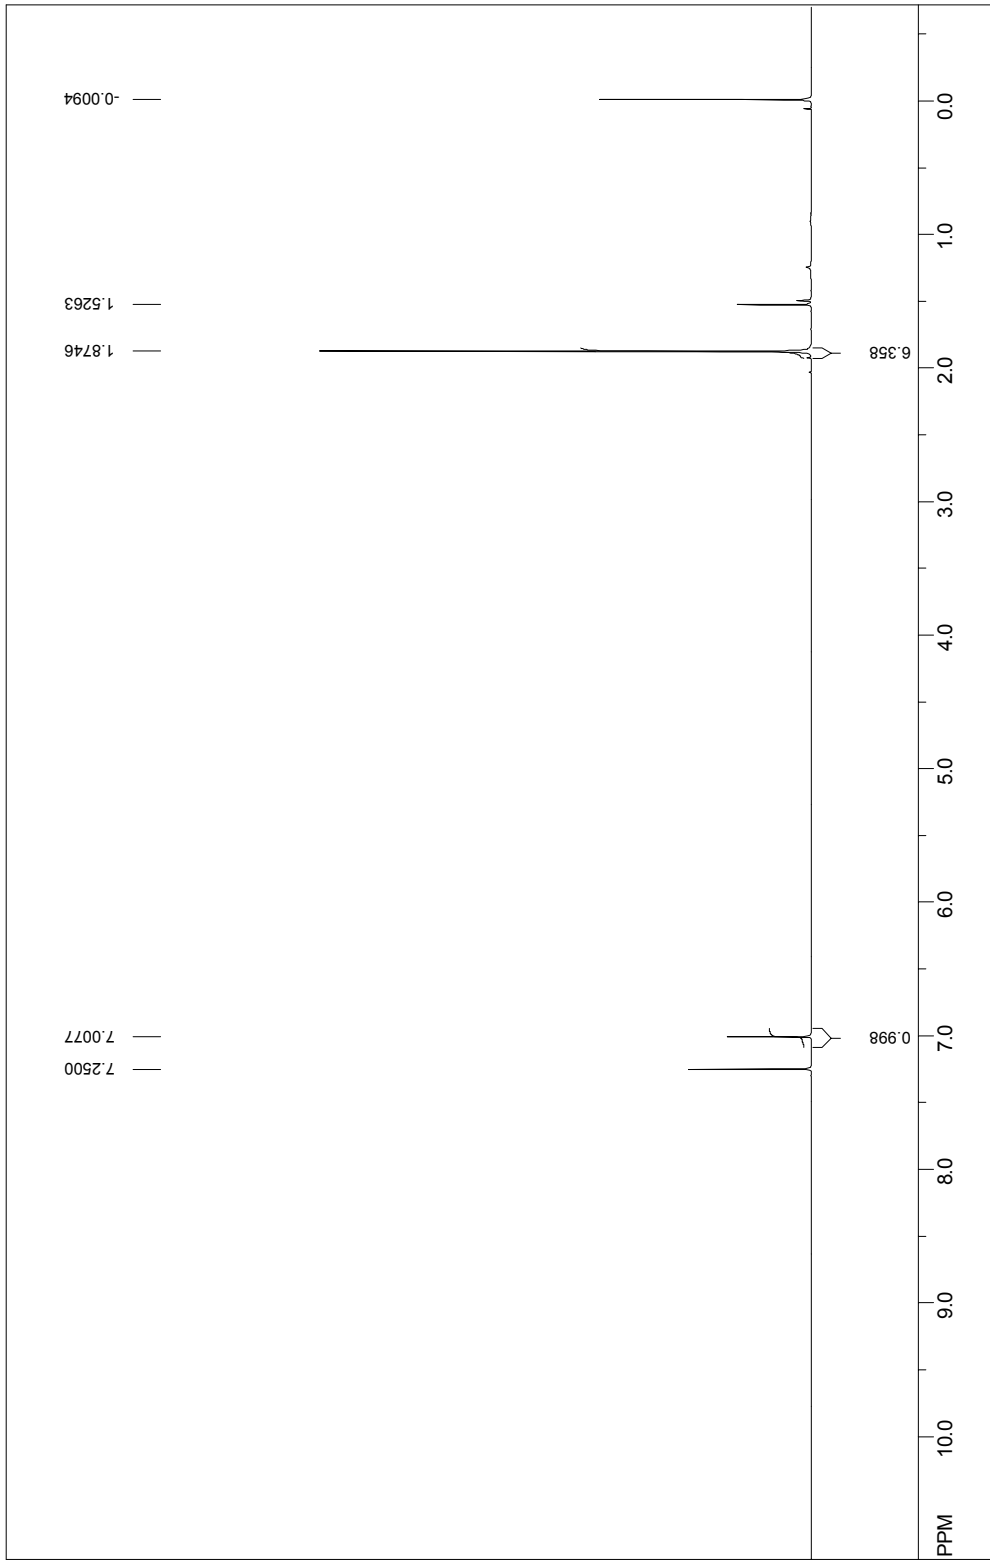

file: U:\research\paper\data\mri\Jun26-2004\1\fid exp1 ->g30->  
transmitter freq.: 400.132471 MHz  
time domain size: 32768 points  
width: 8278.15 Hz = 20.688513 ppm = 0.256659 Hz/pt  
number of scans: 16

freq. of 0 ppm: 400.130013 MHz  
processed size: 16384 complex points  
LB: 0.300 GB: 0.0000

# Compound 6 <sup>13</sup>C NMR

SpinWorks 2.4:

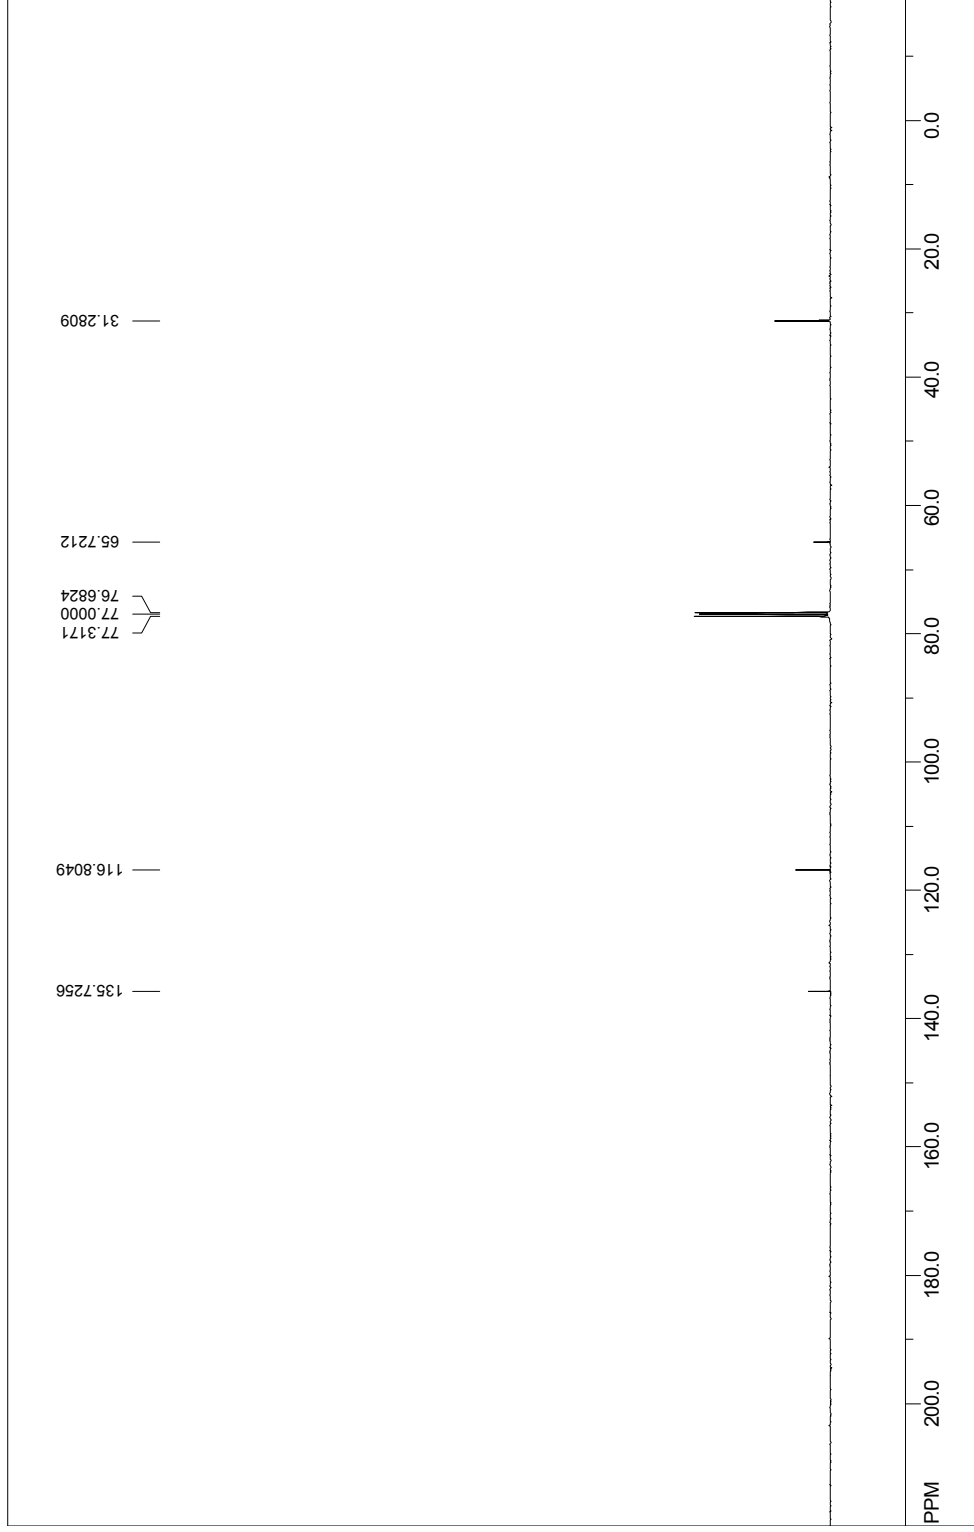

file: L:\research\paper\data\nmr\2-c\1\fid exp: <zipg90>  
transmitter freq.: 100.622830 MHz  
time domain size: 6556 points  
width: 23990.62 Hz = 238.323802 ppm = 0.365918 Hz/pt  
number of scans: 377

freq. of 0 ppm: 100.612769 MHz  
processed size: 32768 complex points  
LB: 1.000 GB: 0.0000



# Compound 7 <sup>1</sup>H NMR

SpinWorks 2.4:

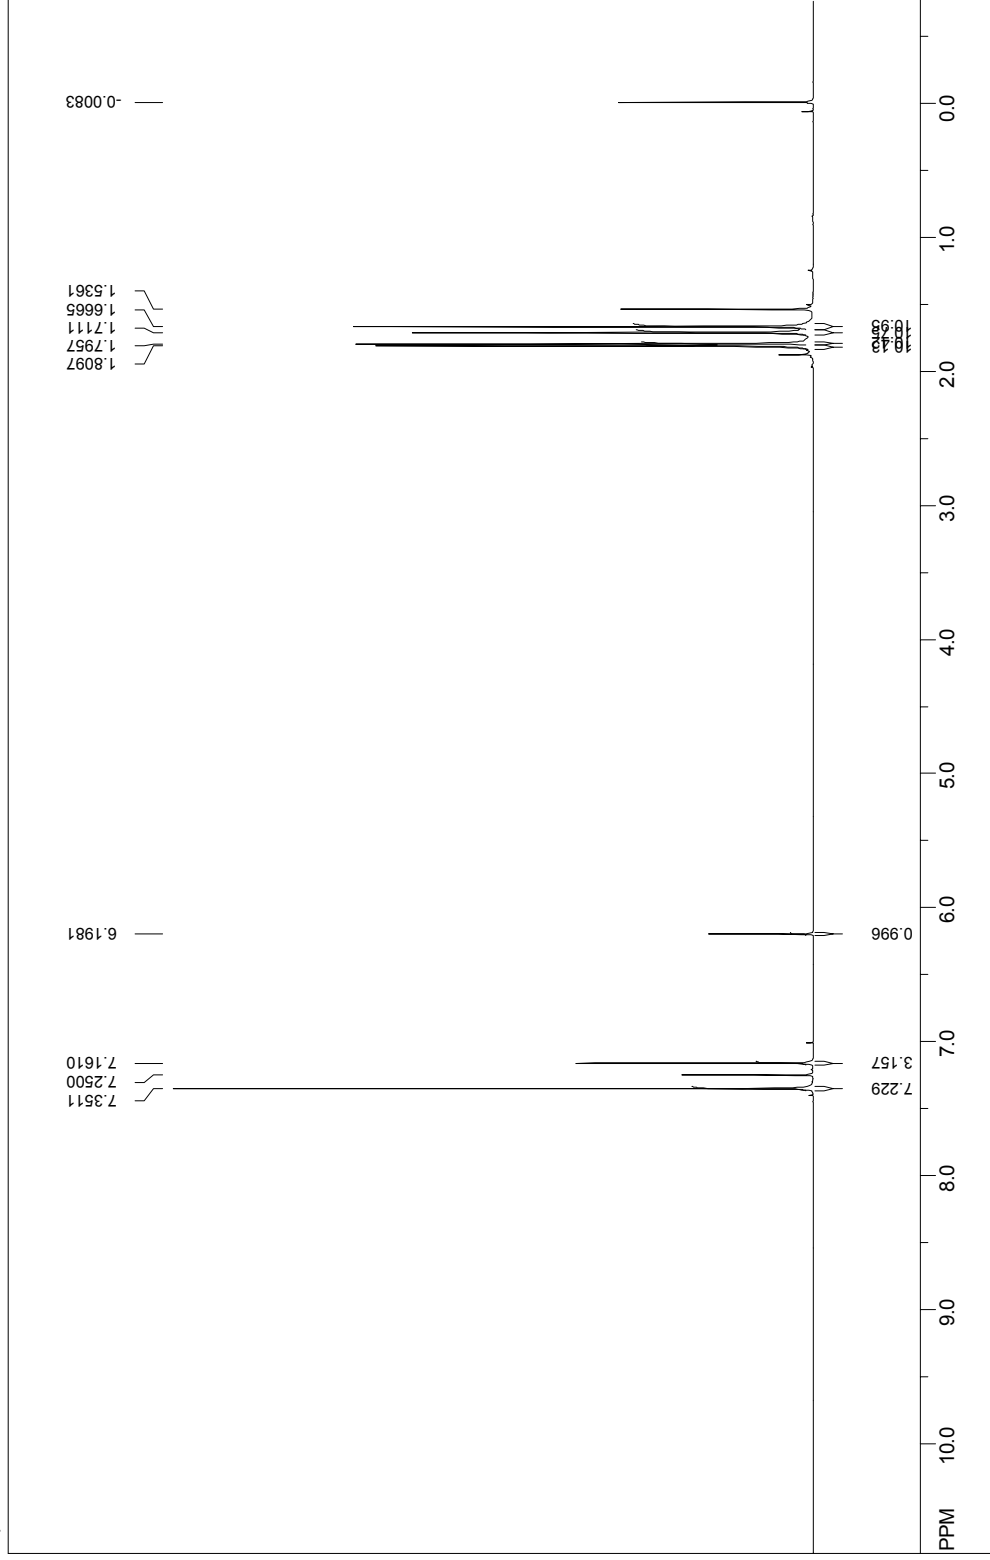

file: U:\research\paper\data\mm3-h\1\fid exp1 -zg30-  
transmitter freq.: 400.132471 MHz  
time domain size: 32768 points  
width: 8278.15 Hz = 20.688513 ppm = 0.256659 Hz/pt  
number of scans: 16

freq. of 0 ppm: 400.130013 MHz  
processed size: 16384 complex points  
LB: 0.300 GB: 0.0000





# Compound 8 <sup>13</sup>C NMR

SpinWorks 2.4:

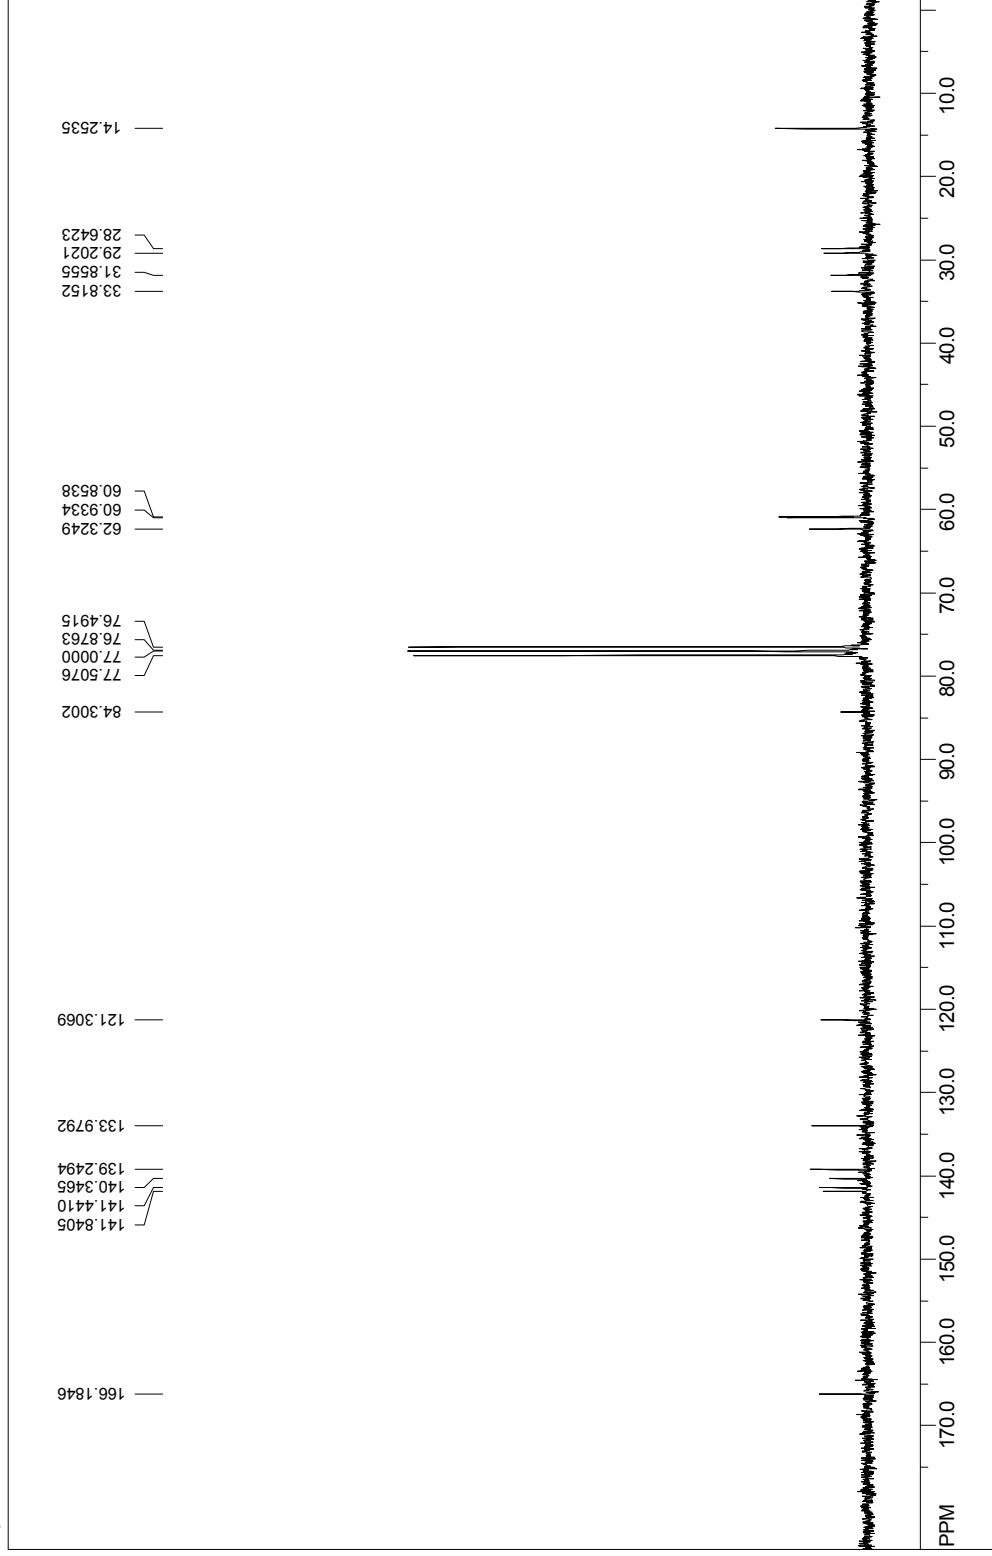

file: U:\nmr\sy-4-1-011\fid exp1 -<39930>  
transmitter freq: 62.901528 MHz  
time domain size: 65536 points  
width: 15060.24 Hz = 239.425677 ppm = 0.229801 Hz/pt  
number of scans: 326

freq. of 0 ppm: 62.895240 MHz  
processed size: 32768 complex points  
LB: 1.000 GB: 0.0000

# Compound 9 <sup>1</sup>H NMR

SpinWorks 2.4:

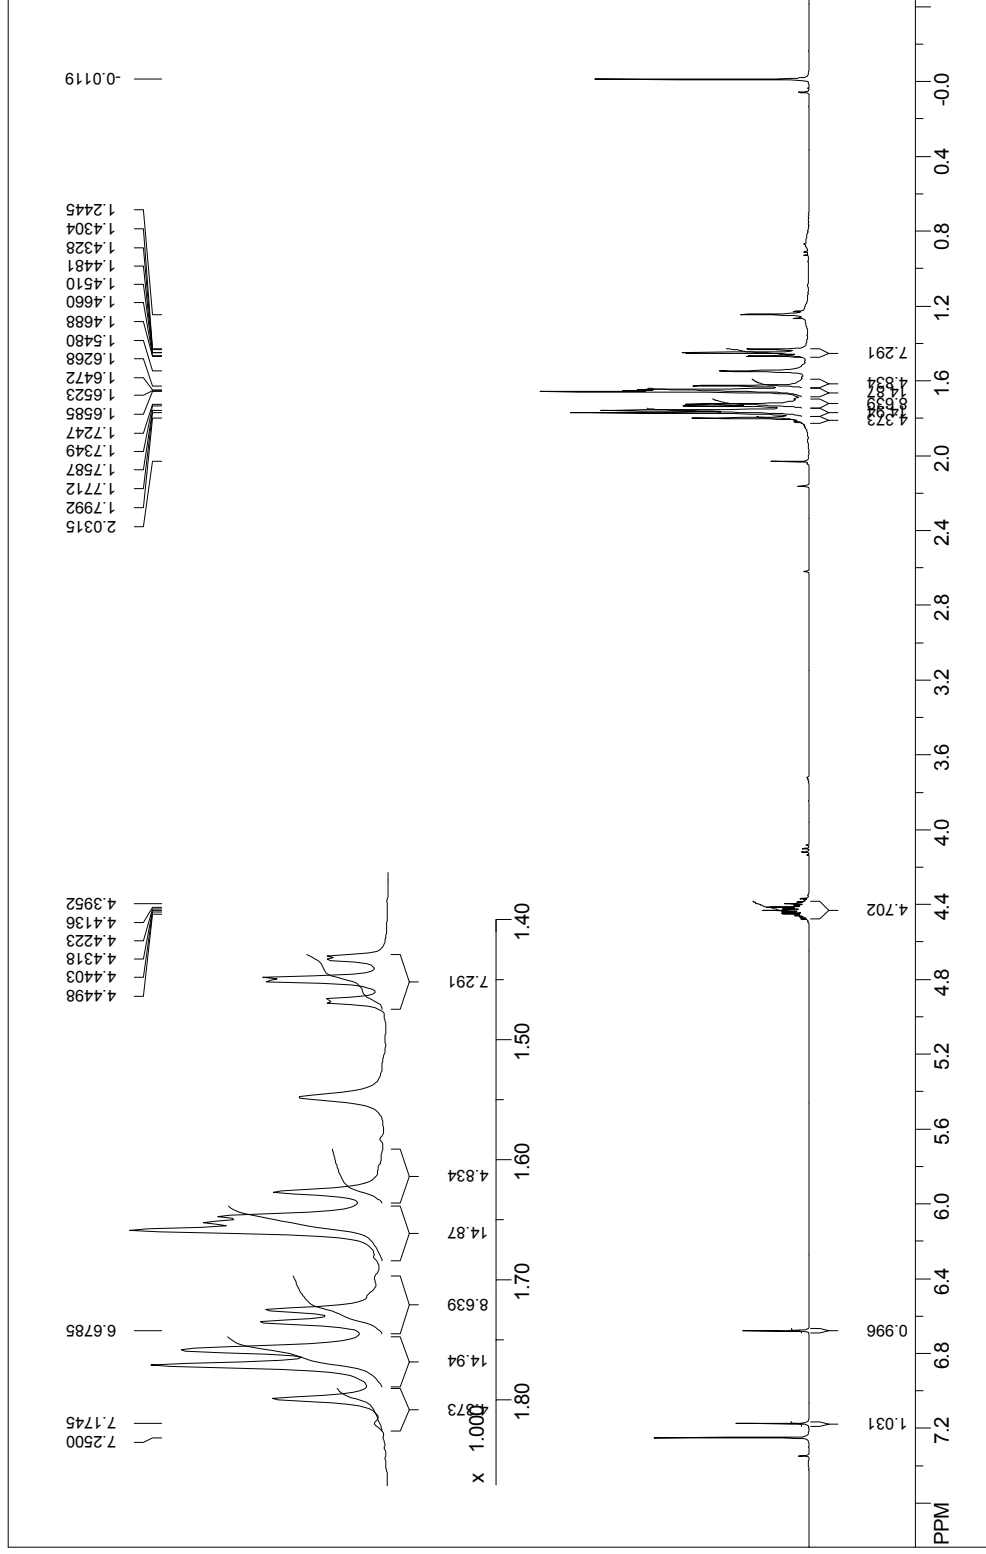

file: U:\research\paper\data\mrisk-4-4-2-h\1fid exp1 <cg30>  
 transmitter freq: 400.132471 MHz  
 time domain size: 32768 points  
 width: 8278.15 Hz = 20.688513 ppm = 0.252629 Hz/pt  
 number of scans: 16

freq. of 0 ppm: 400.130013 MHz  
 processed size: 16384 complex points  
 LB: 0.300 GE: 0.0000

# Compound 9 <sup>13</sup>C NMR

SpinWorks 2.4:

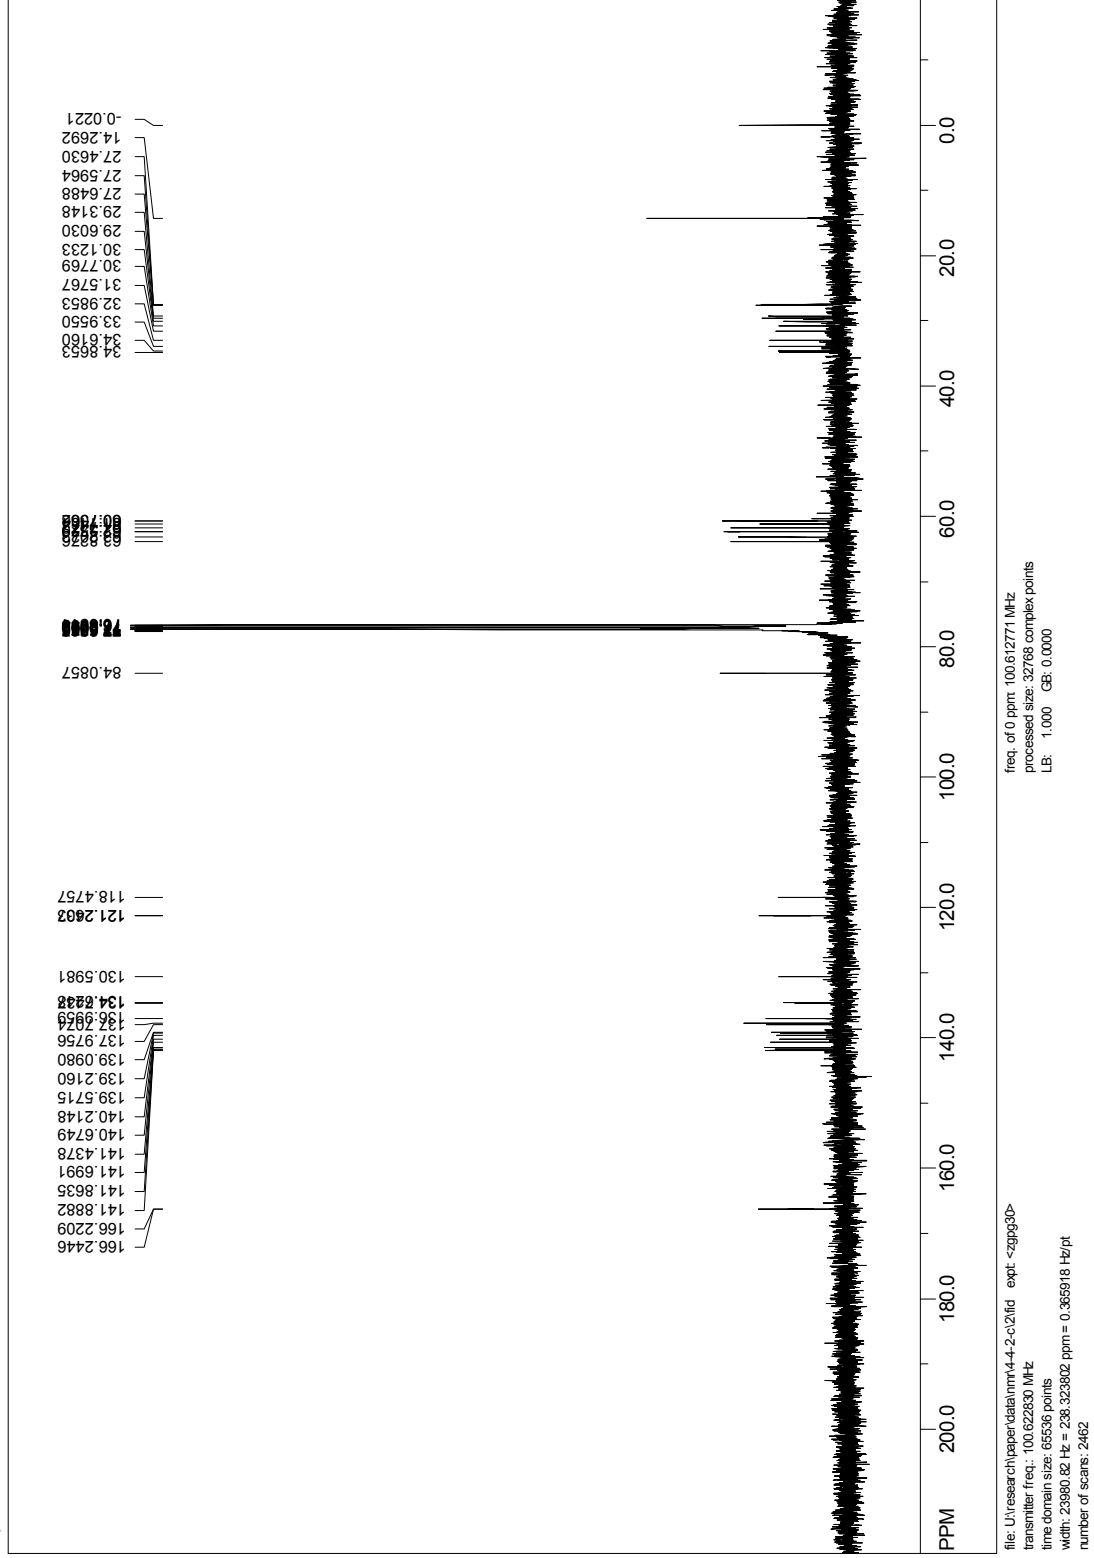

# Compound 9 expanded <sup>13</sup>C NMR

SpinWorks 2.4:

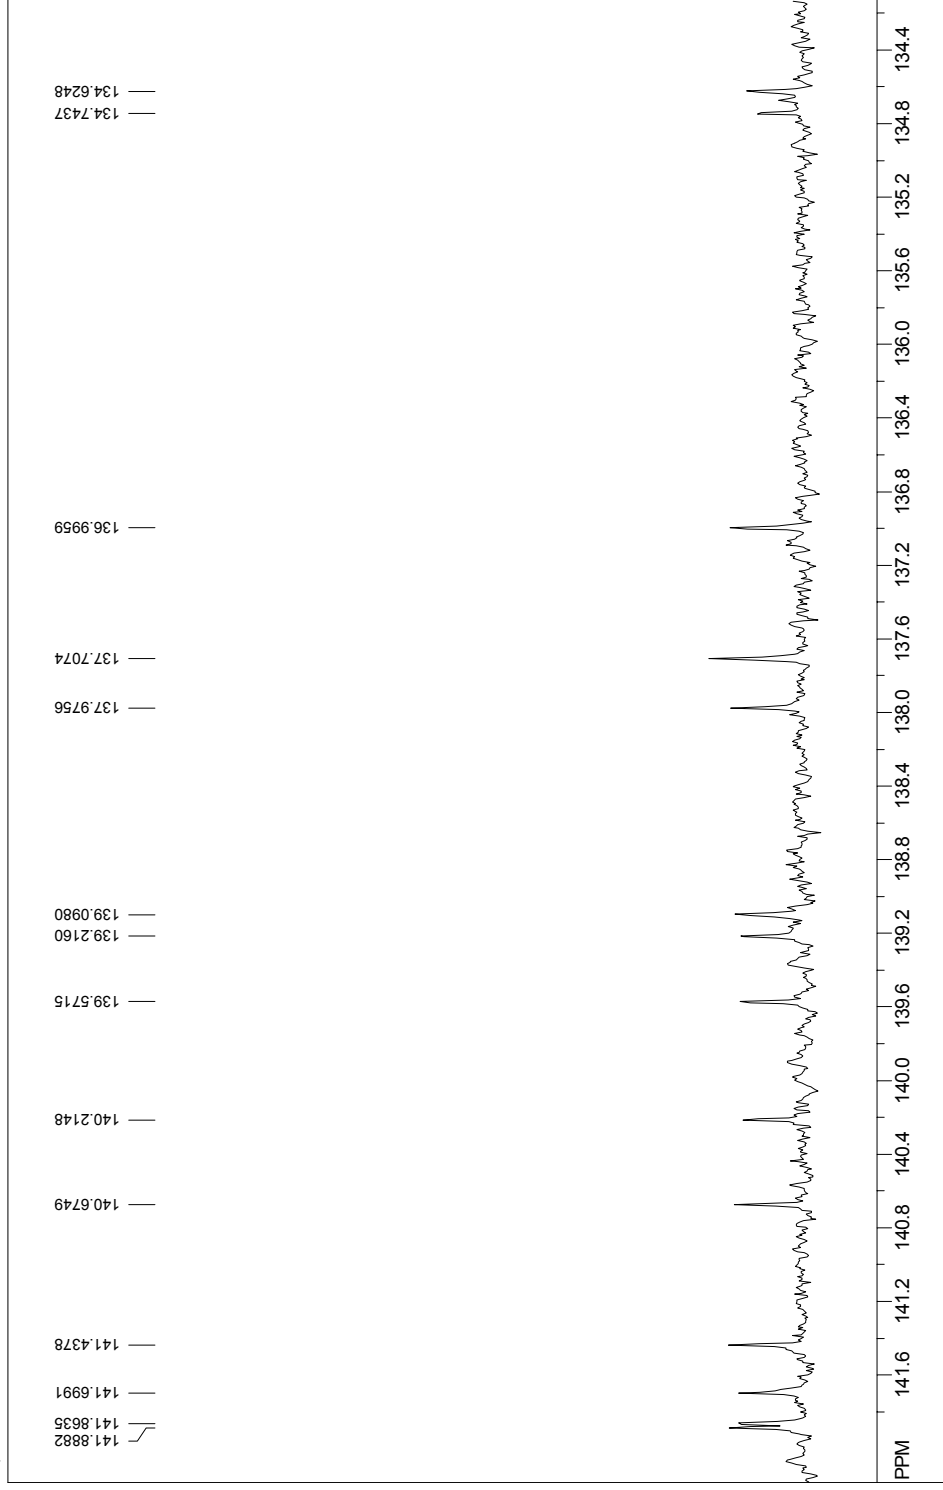

file: U:\research\paper\data\mm4-2-c12\fid exp1-zgpg30<  
transmitter freq.: 100.622830 MHz  
time domain size: 65536 points  
width: 2380.02 Hz = 238.328002 ppm = 0.365918 Hz/pt  
number of scans: 2462

freq. of 0 ppm: 100.612771 MHz  
processed size: 32768 complex points  
LE: 1.000 GB 0.0000

# Compound 9 expanded <sup>13</sup>C NMR

SpinWorks 2.4:

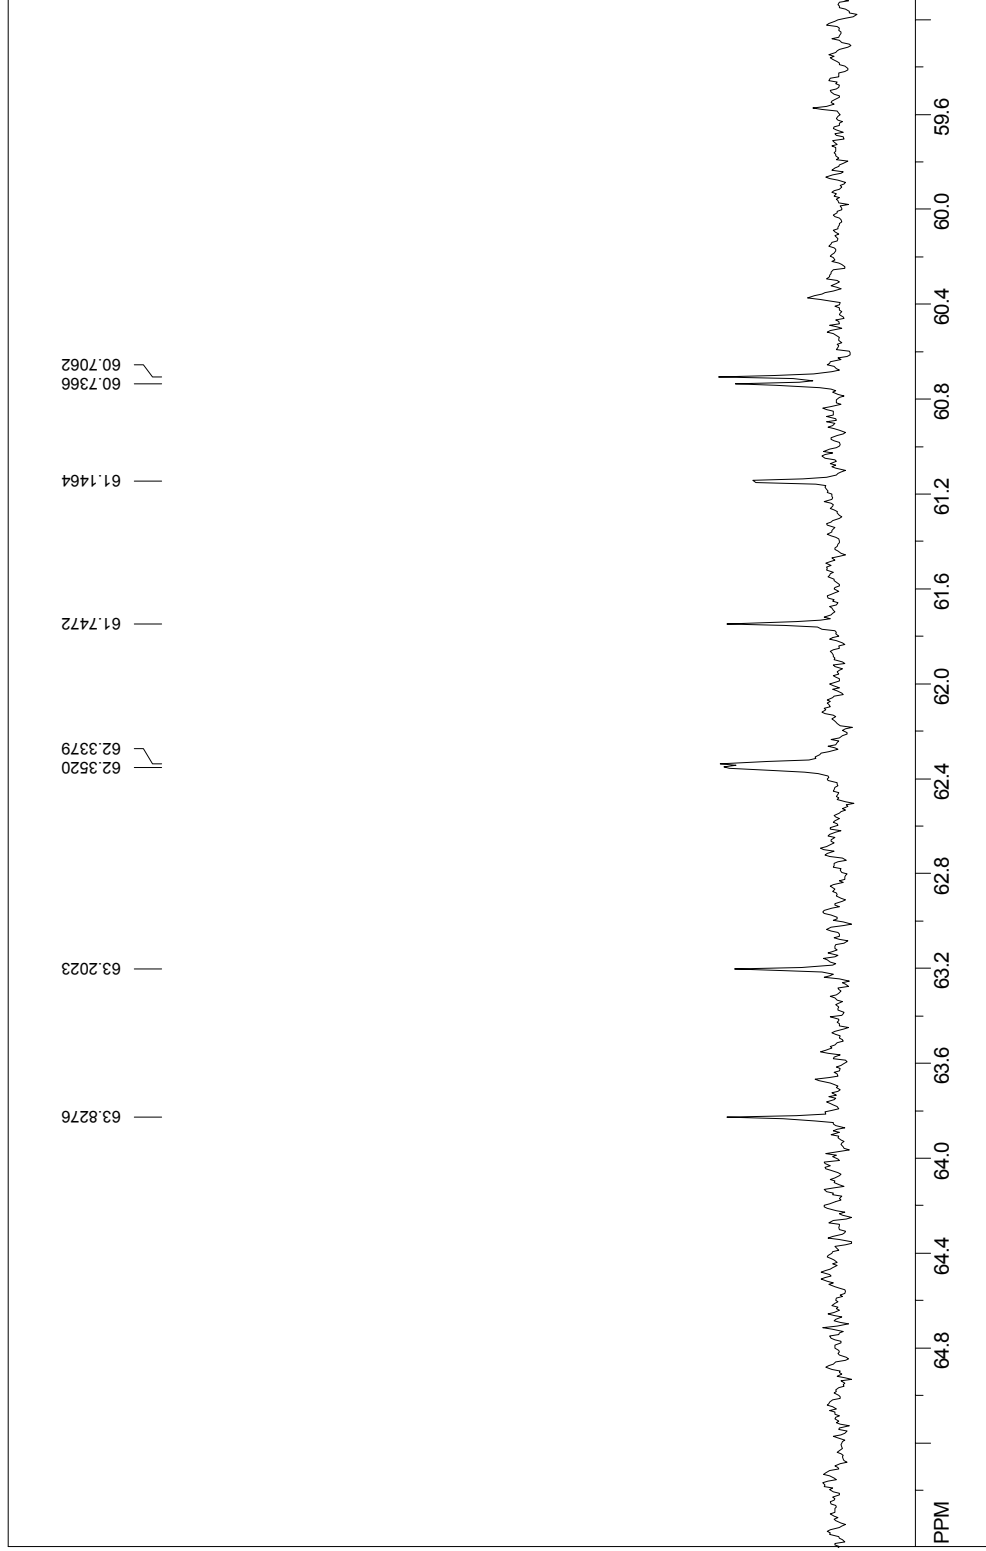

file: U:\research\paper\data\mr4-4-2-c\2\fid exp: <gg930>  
transmitter freq.: 100.622830 MHz  
time domain size: 65536 points  
width: 23980.82 Hz = 238.32802 ppm = 0.365818 Hz/pt  
number of scans: 2462

freq. of 0 ppm: 100.612771 MHz  
processed size: 32768 complex points  
LB: 1.000 GB: 0.0000



# Compound 9 expanded <sup>13</sup>C NMR

SpinWorks 2.4:

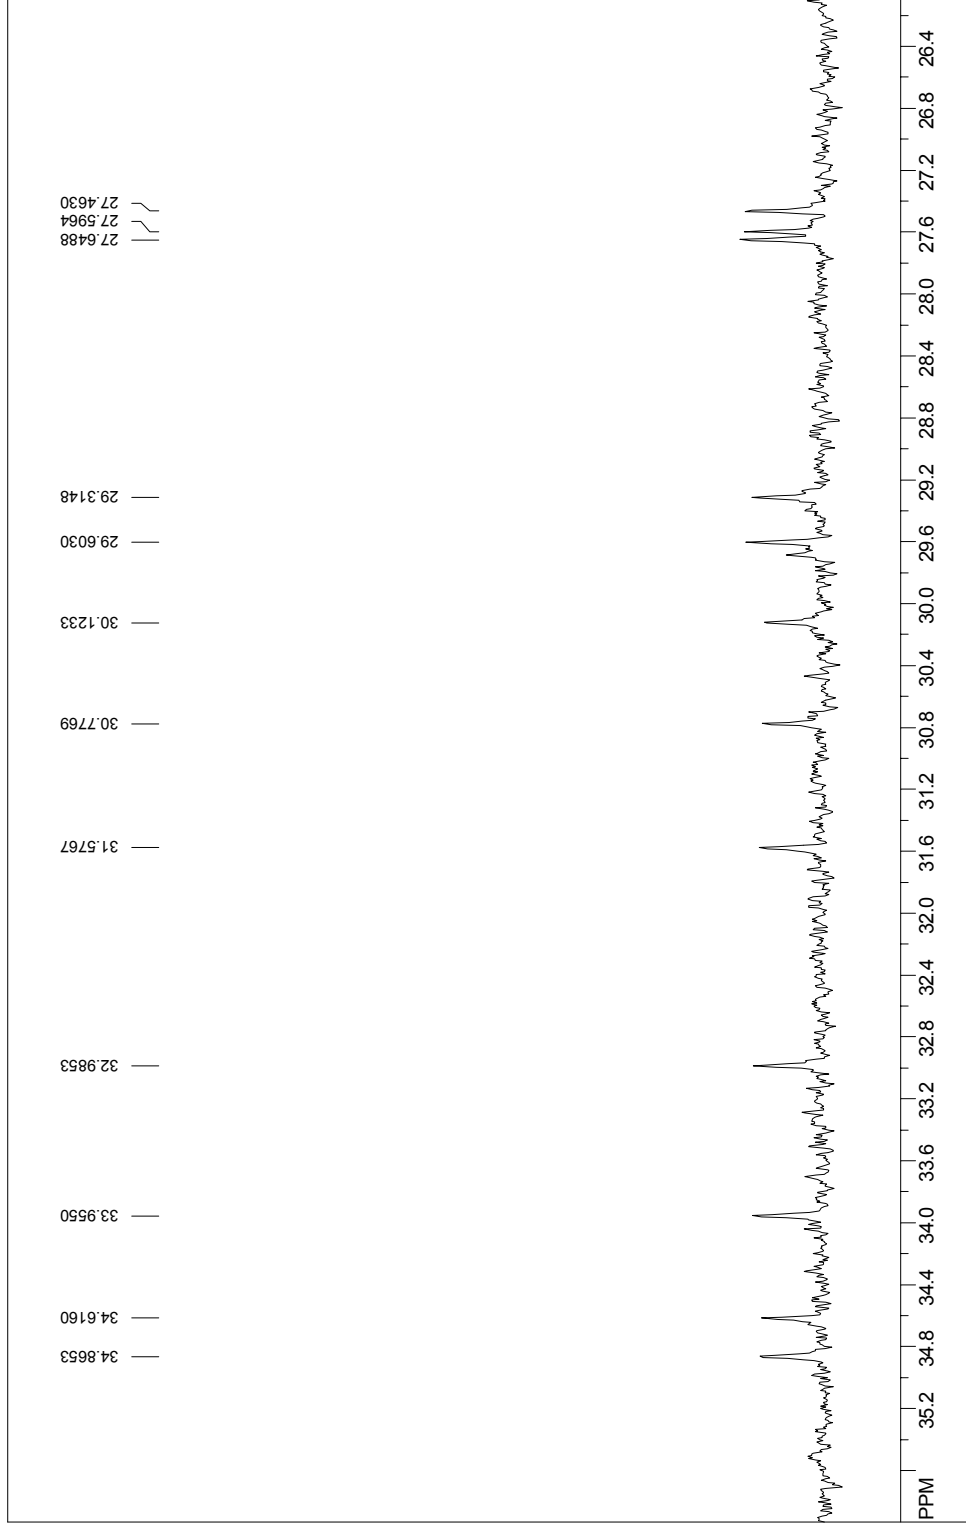

file: U:\research\paper\data\mnmv4-2-c2\fid exp1 <zgpg30>  
transmitter freq.: 100.622830 MHz  
time domain size: 65536 points  
width: 23980.82 Hz = 238.322802 ppm = 0.365918 Hz/pt  
number of scans: 2462

freq. of 0 ppm: 100.612771 MHz  
processed size: 32768 complex points  
LB: 1.000 GB: 0.0000

# Compound 10 <sup>1</sup>H NMR

SpinWorks 2.4:

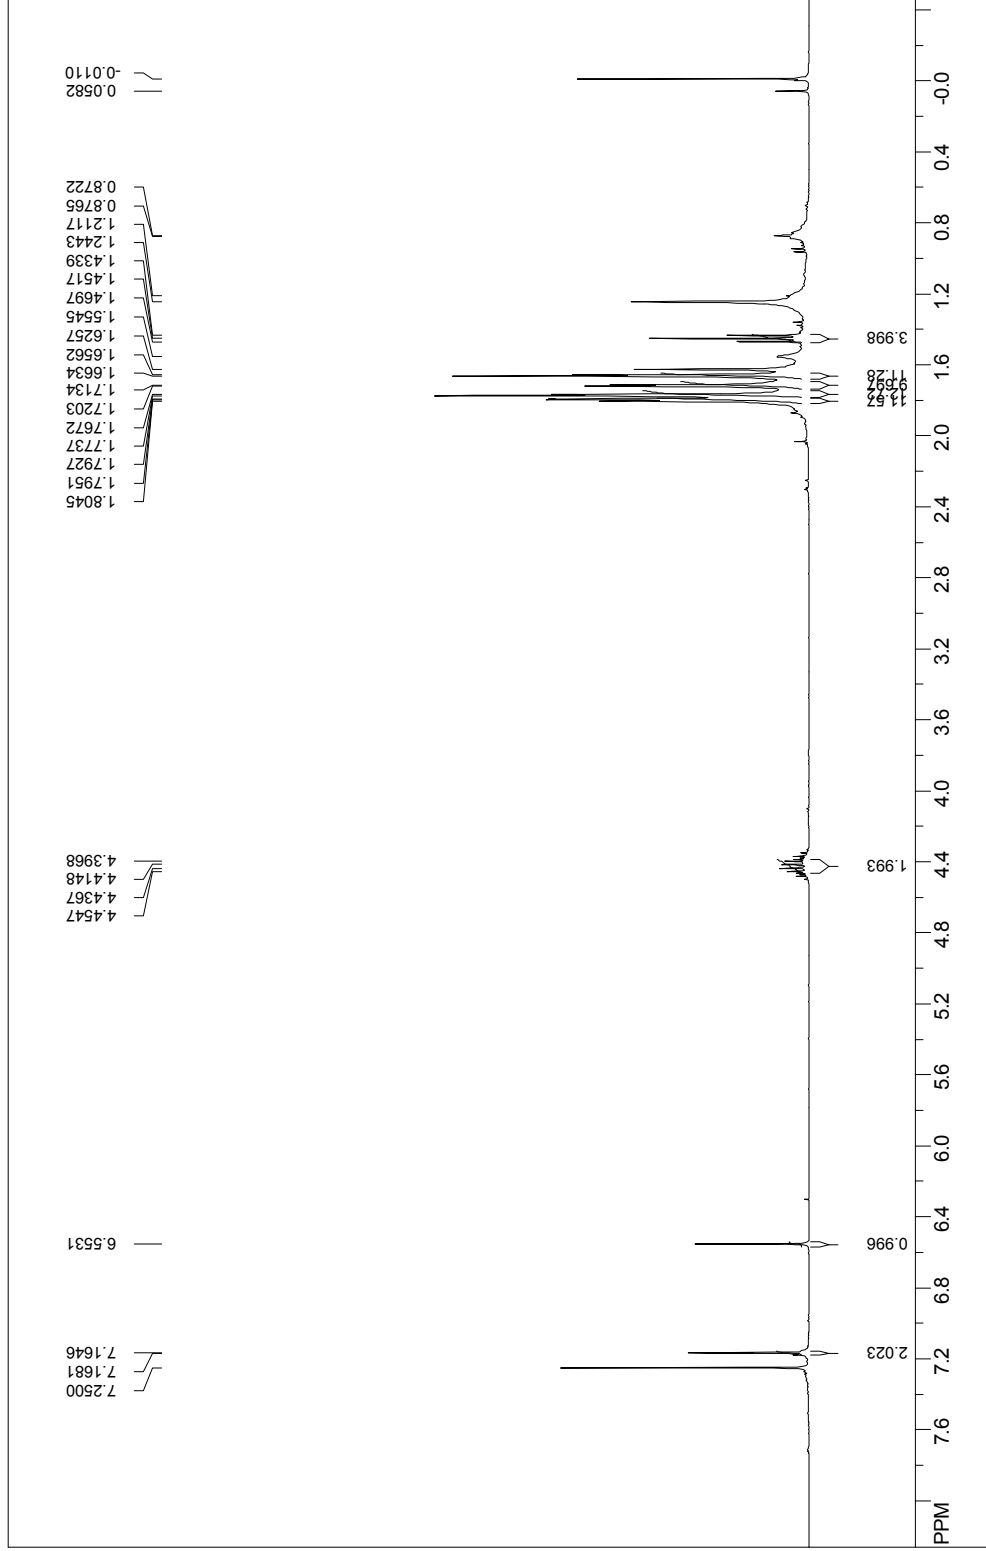

file: U:\research\paper\data\mr\4-4-3-h\1\fid exp: <zg30>  
transmitter freq: 400.132471 MHz  
time domain size: 32768 points  
width: 8278.15 Hz = 20.688513 ppm = 0.252629 Hz/pt  
number of scans: 16

freq. of 0 ppm: 400.130013 MHz  
processed size: 16384 complex points  
LE: 0.300 GE: 0.0000

# Compound 10 <sup>13</sup>C NMR

SpinWorks 2.4:

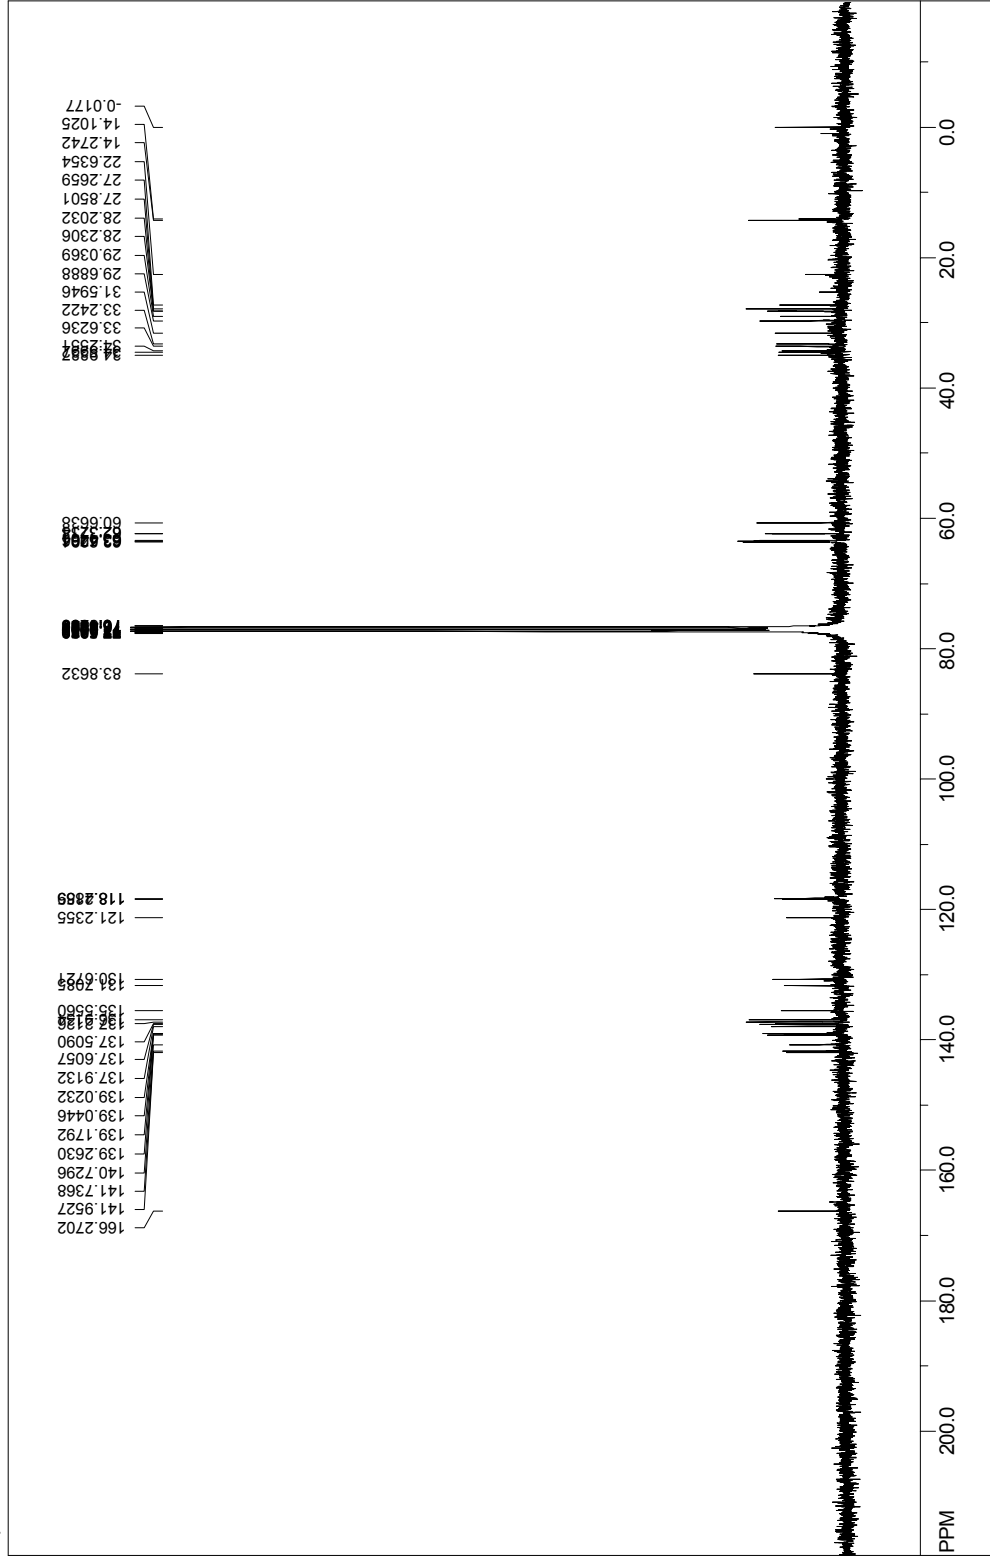

file: U:\research\paper\data\mm\4-4-3-c\11fid exp: <zigzag>  
transmitter freq.: 100.622830 MHz  
time domain size: 65536 points  
width: 23960.82 Hz = 238.323802 ppm = 0.365918 Hz/pt  
number of scans: 4095

freq. of 0 ppm: 100.612770 MHz  
processed size: 32768 complex points  
LB: 1.000 GB: 0.0000

# Compound 10 expanded <sup>13</sup>C NMR

SpinWorks 2.4:

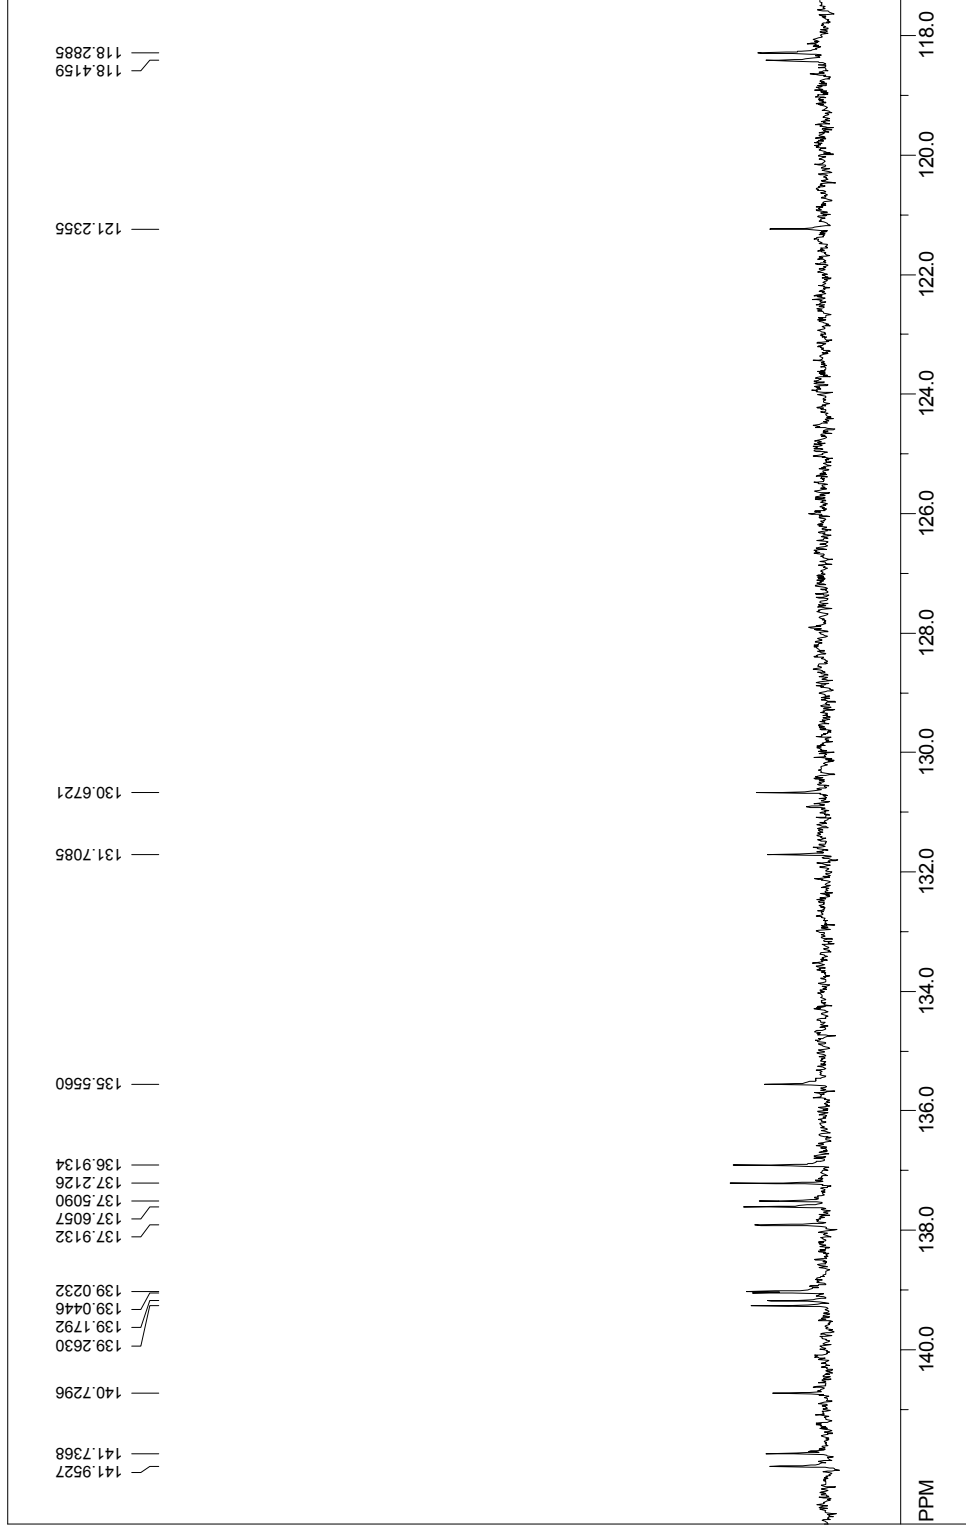

file: U:\research\paper\data\1nmv4-3-c1\fid exp1 <zgpg30>  
transmitter freq.: 100.622830 MHz  
time domain size: 65536 points  
width: 23980.82 Hz = 238.323802 ppm = 0.365918 Hz/pt  
number of scans: 4095

freq. of 0 ppm: 100.612770 MHz  
processed size: 32768 complex points  
LB: 1.000 GB: 0.0000

# Compound 10 expanded <sup>13</sup>C NMR

SpinWorks 2.4:

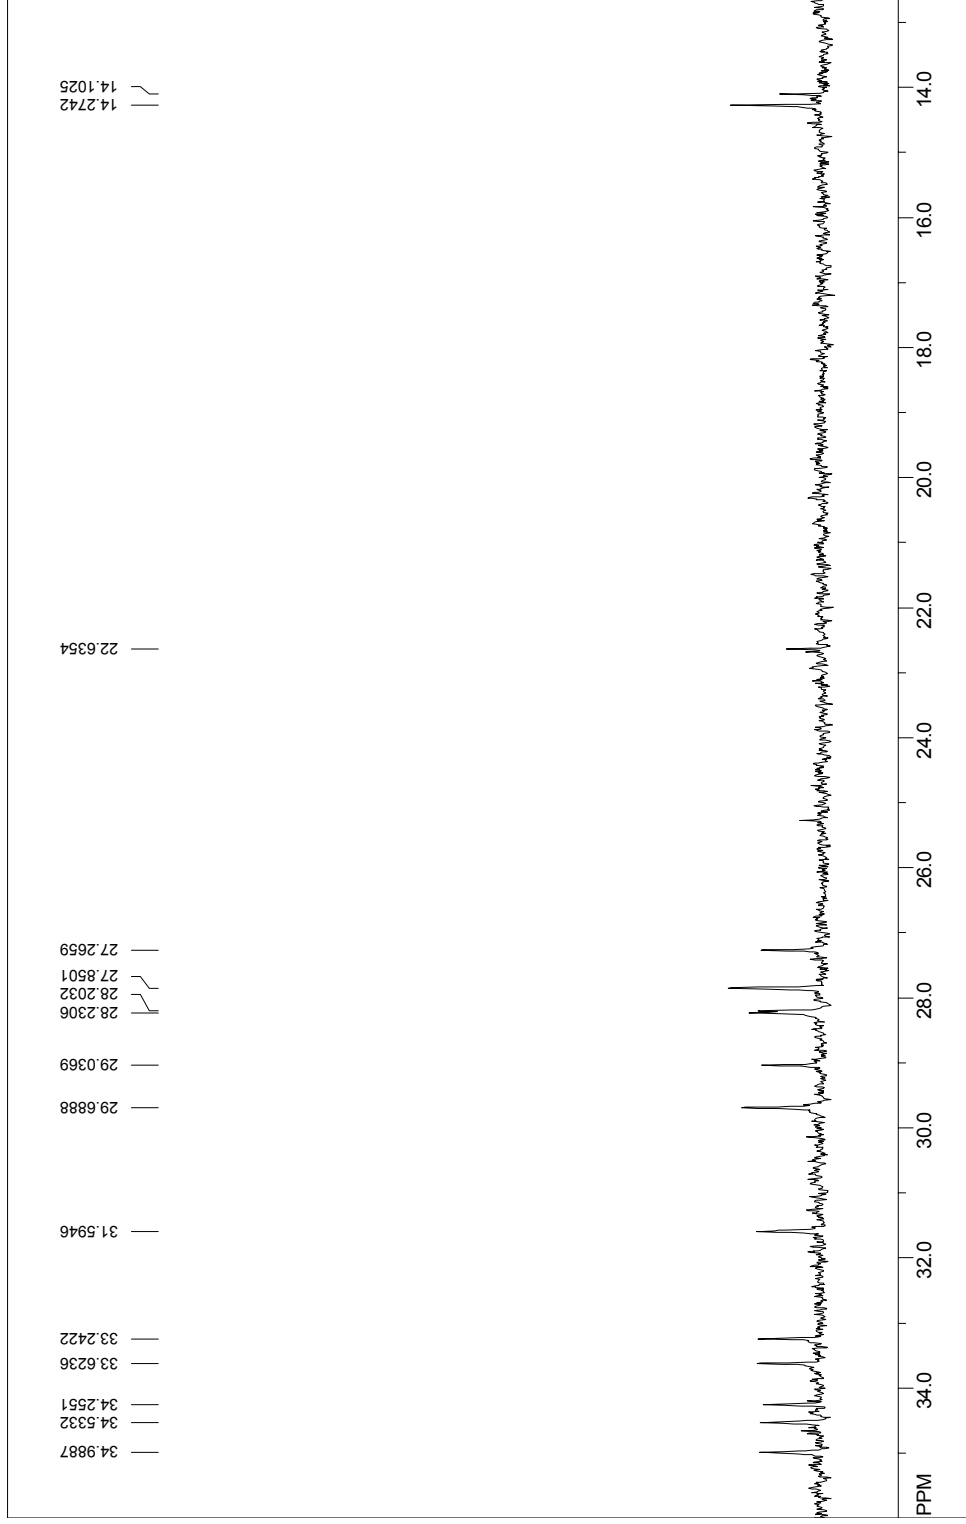

file: U:\research\paper\data\mm4-4-3-e1\fid exp1 ->zgpg50->  
transmitter freq.: 100.622830 MHz  
time domain size: 65536 points  
width: 23580.82 Hz = 238.323802 ppm = 0.365918 Hz/pt  
number of scans: 4095

freq. of 0 ppm: 100.612770 MHz  
processed size: 32768 complex points  
LB: 1.000 GB: 0.0000

# Compound 10 expanded $^{13}\text{C}$ NMR

SpinWorks 2.4:

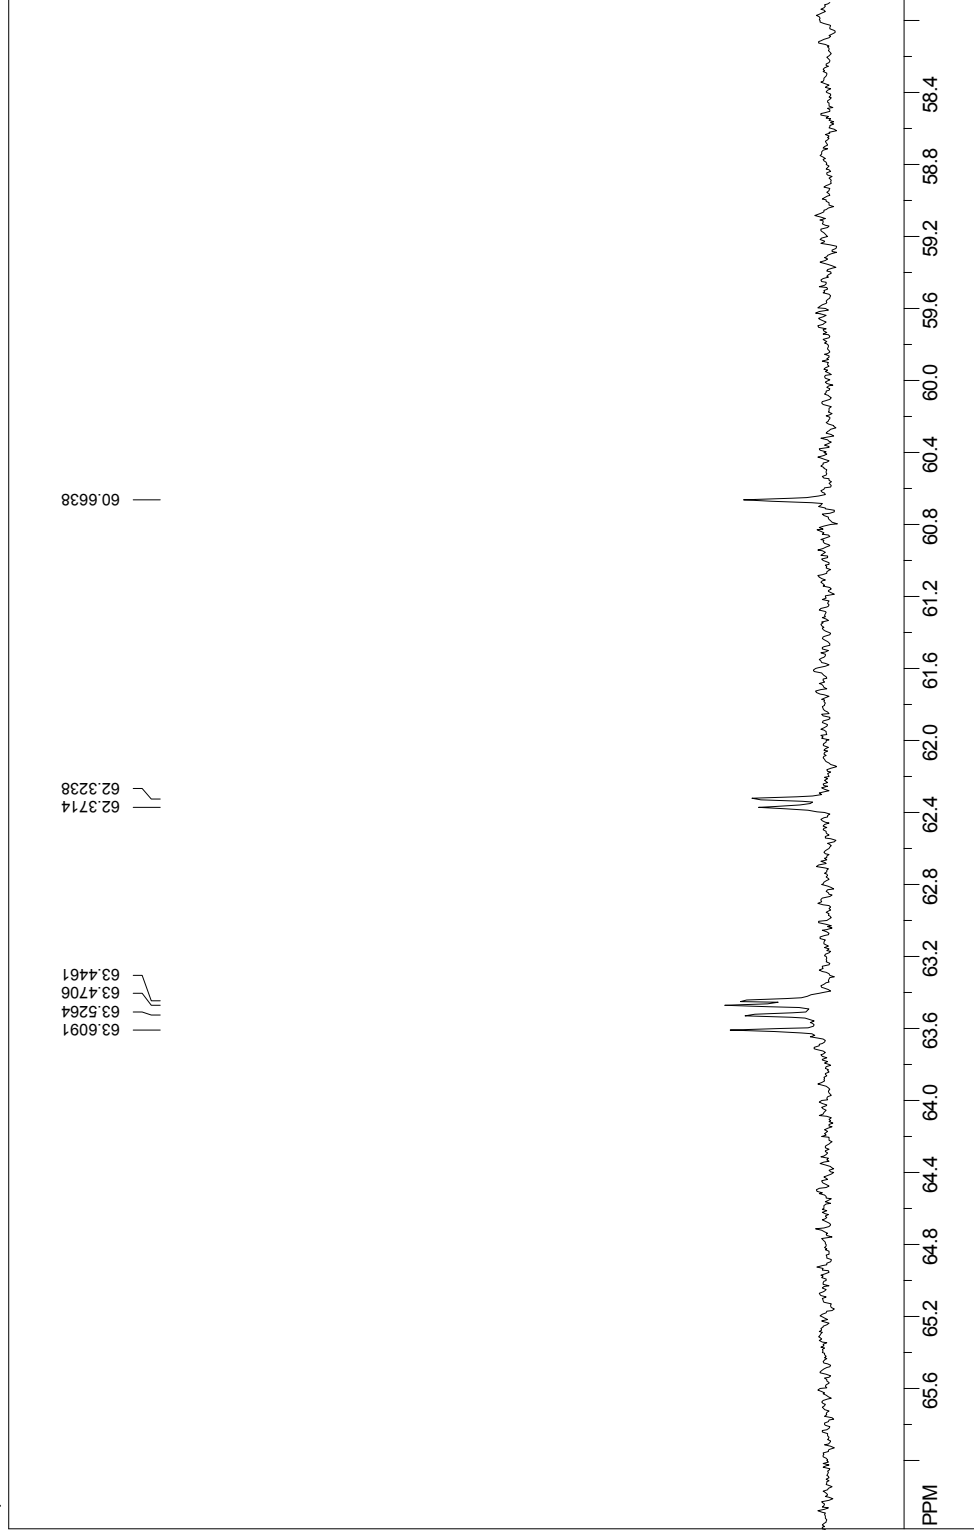

file: U:\research\paper\data\mm14-4-3-c1\fid exp1 <zgpg30>  
transmitter freq.: 100.622830 MHz  
line domain size: 65536 points  
width: 23980.82 Hz = 238.323802 ppm = 0.365918 Hz/pt  
number of scans: 4095

freq. of 0 ppm: 100.612770 MHz  
processed size: 32768 complex points  
LB: 1.000 GB: 0.0000

(M+15) residue of the decomposed monoester 3-CO<sub>2</sub>Et sample <sup>1</sup>H NMR  
Solvent CDCl<sub>3</sub>

SpinWorks 2.4:

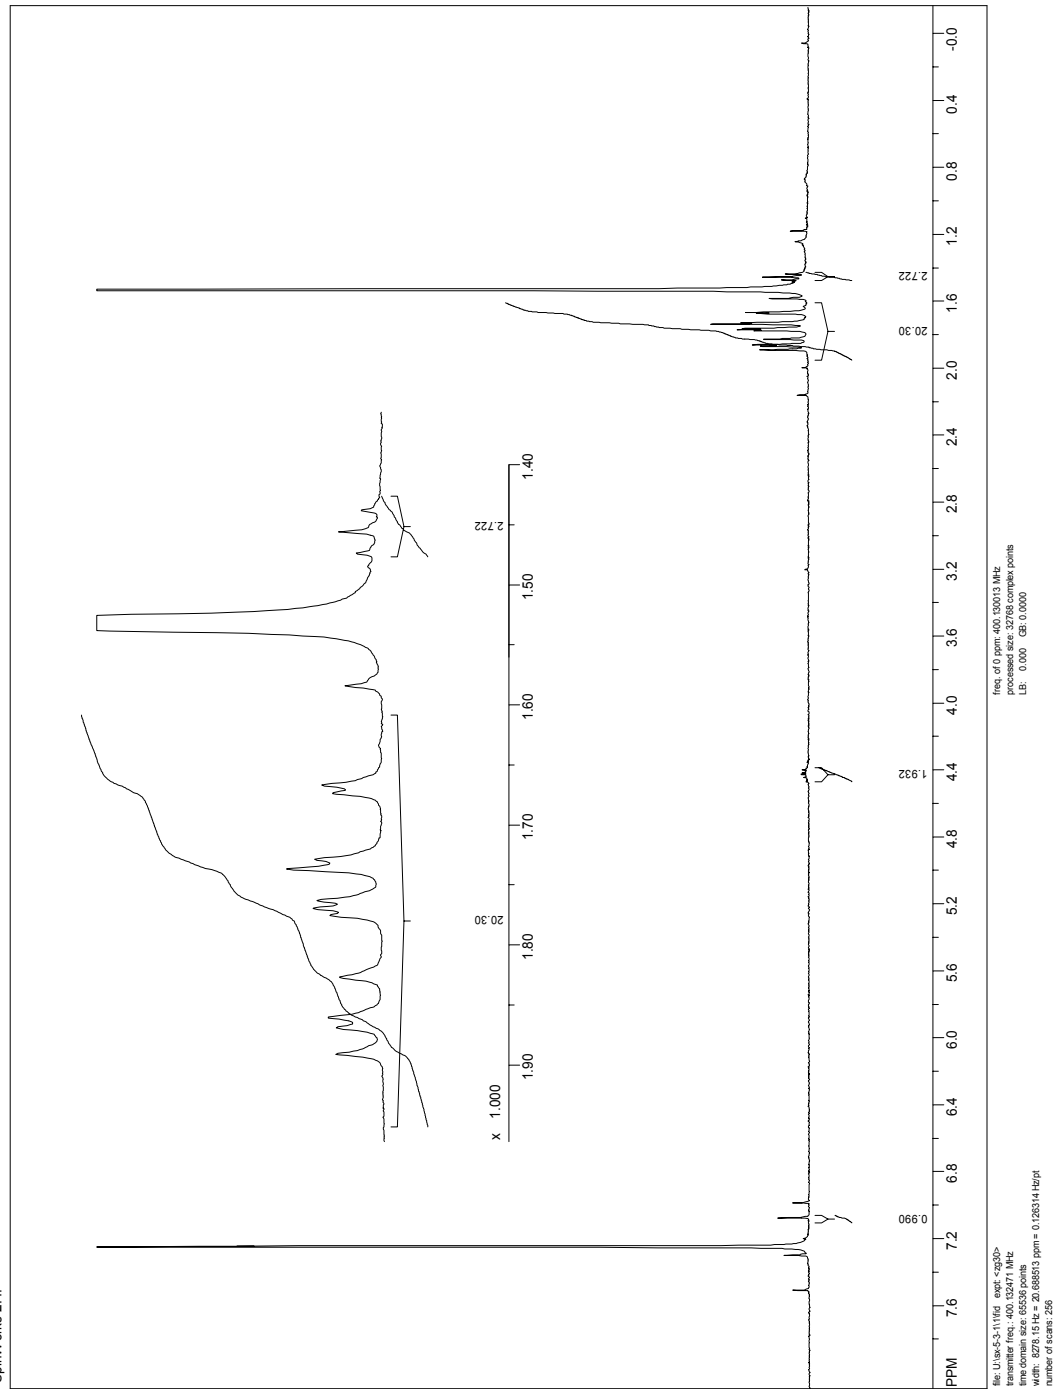

(M+15) residue of the decomposed monoester 3-CO<sub>2</sub>Et sample <sup>1</sup>H NMR  
Solvent CD<sub>3</sub>OD

SpinWorks 2.4:

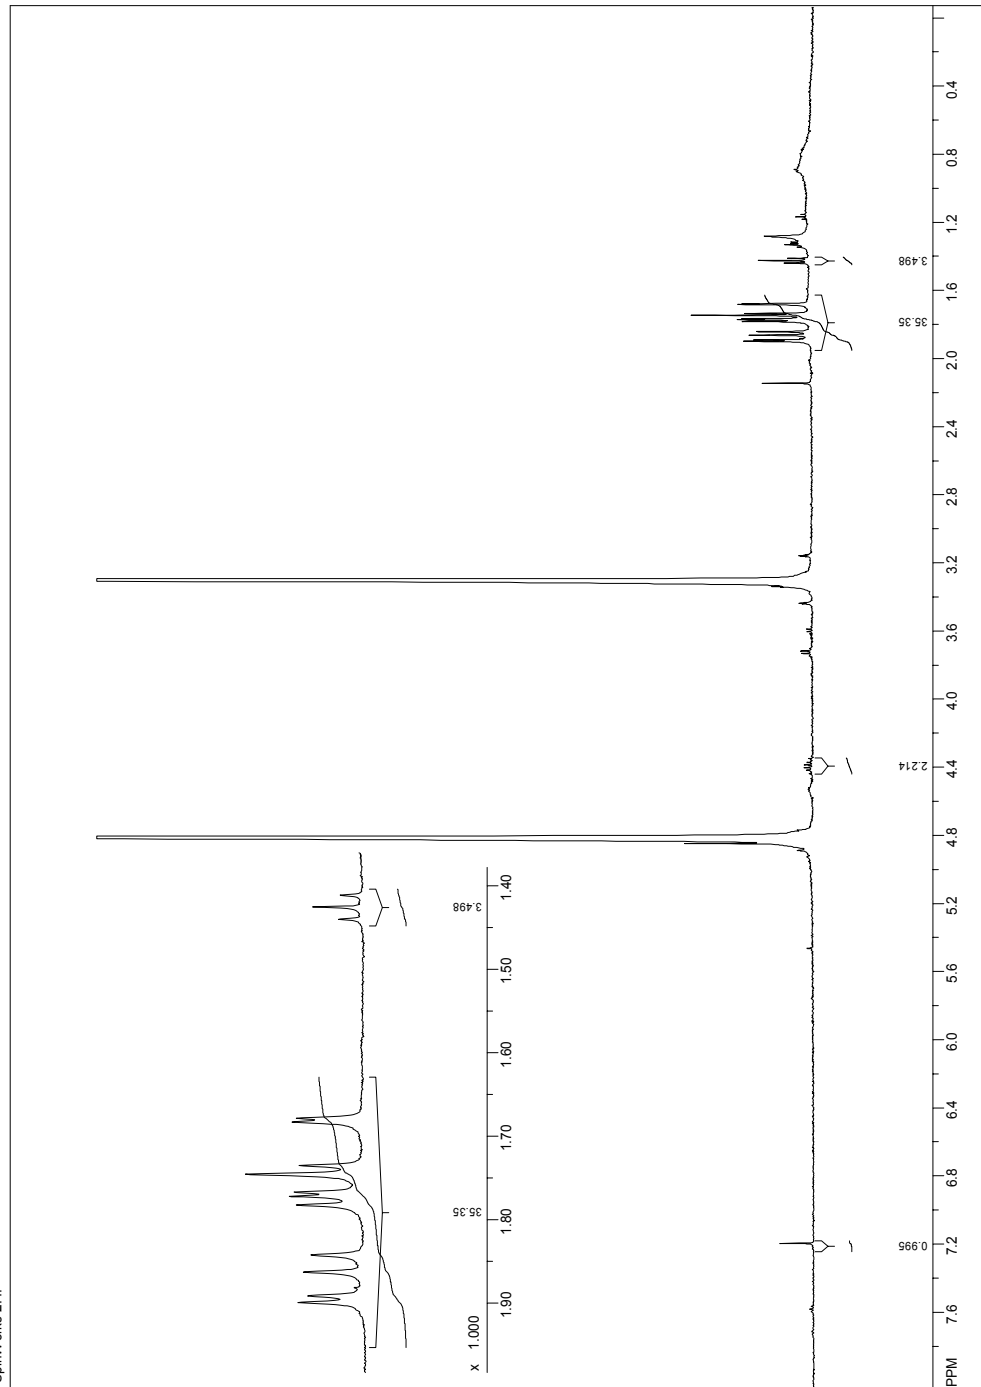

File: U:\nmr\mri\exp5-5-11\fid exp1. <exp5>  
Transmitter freq.: 500.023088 MHz  
Time domain size: 65536 points  
Number of scans: 2, 1600000  
Number of scans: 137

freq. of 0 ppm: 500.020014 MHz  
processed size: 32788 complex points  
LB: 0.000 GB: 0.0000



M residue of the decomposed monoester 3-CO<sub>2</sub>Et sample <sup>1</sup>H NMR  
Solvent CDCl<sub>3</sub>

SpinWorks 2.4:

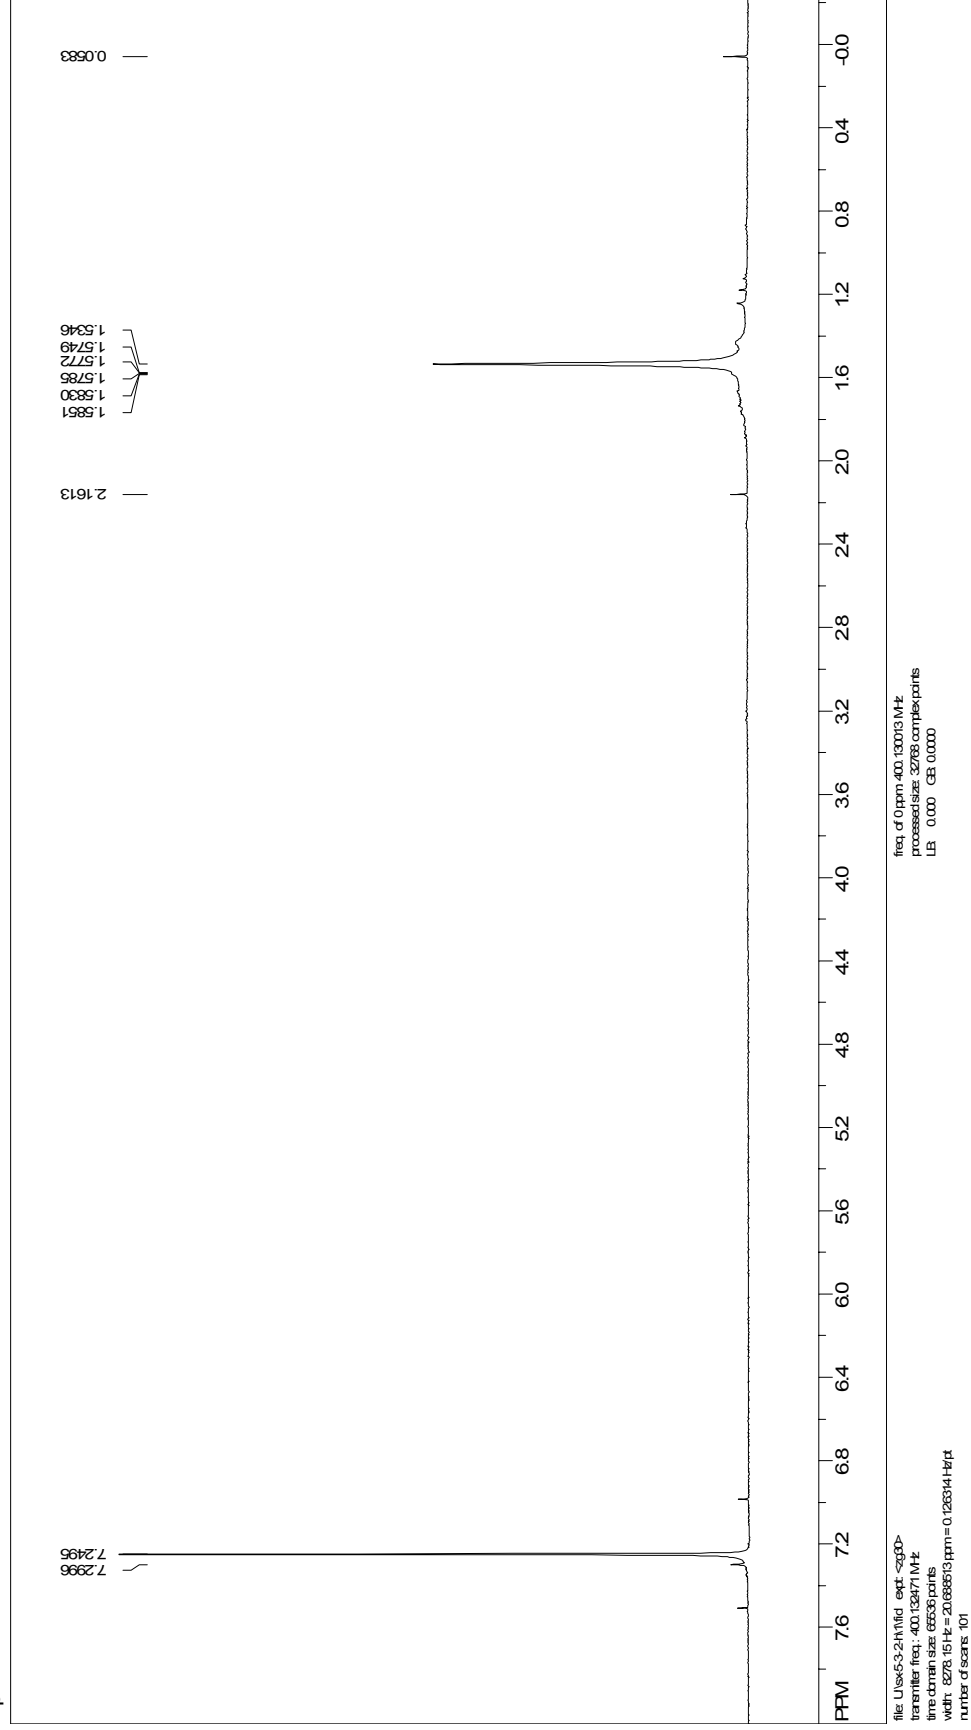

M residue of the decomposed monoester 3-CO<sub>2</sub>Et sample <sup>1</sup>H NMR  
Solvent CD<sub>3</sub>OD

SpinWorks 2.4:

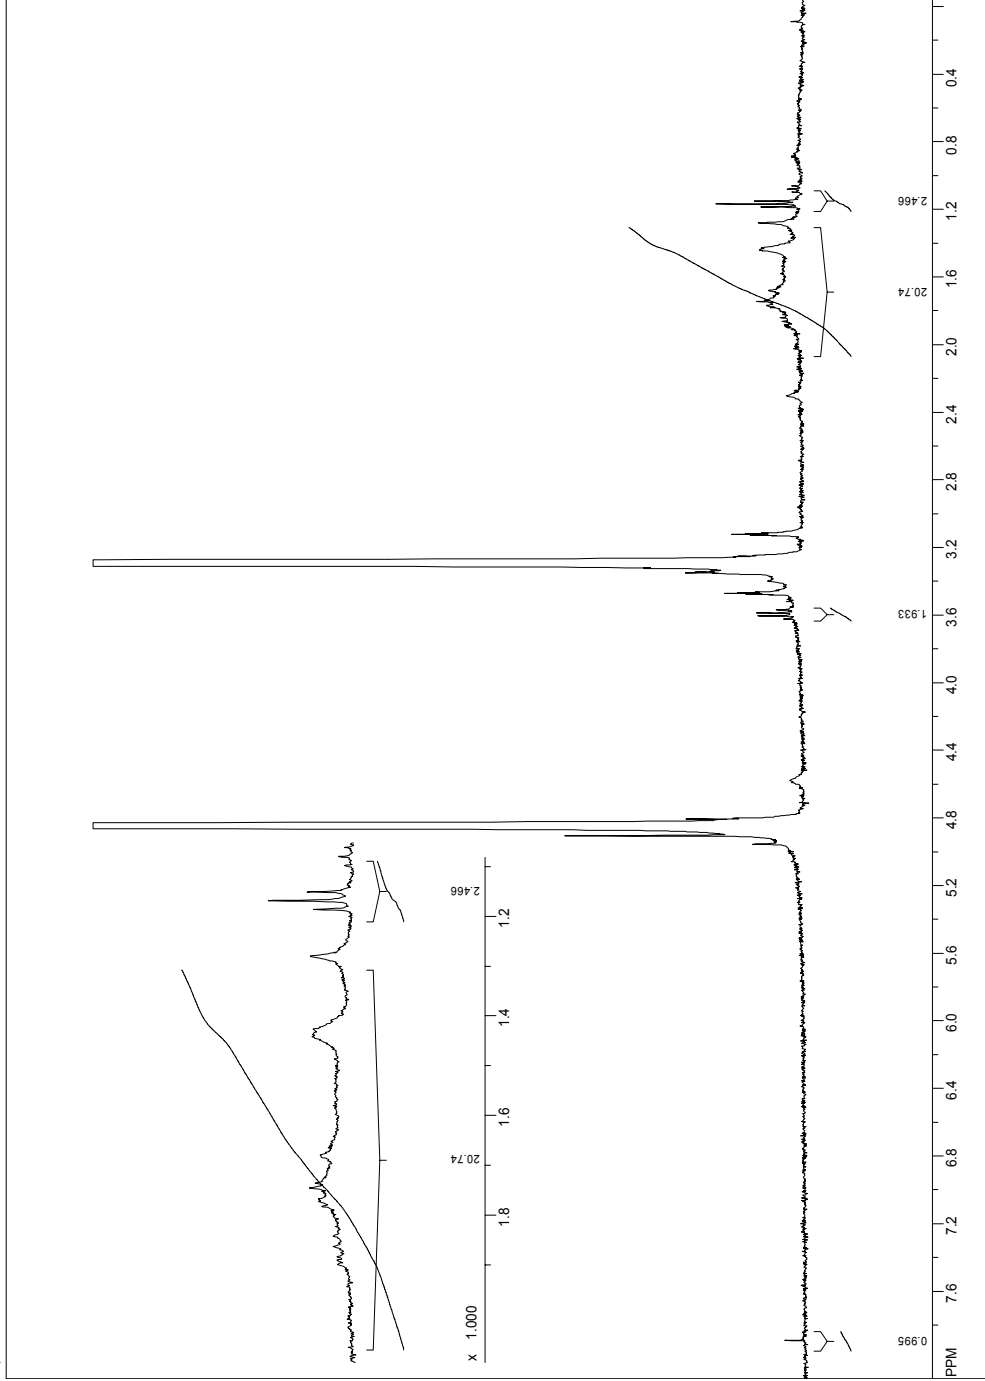

(M+15) residue of the decomposed monoester 2-CO<sub>2</sub>Et sample <sup>1</sup>H NMR  
Solvent CD<sub>3</sub>OD

SpinWorks 2.4:

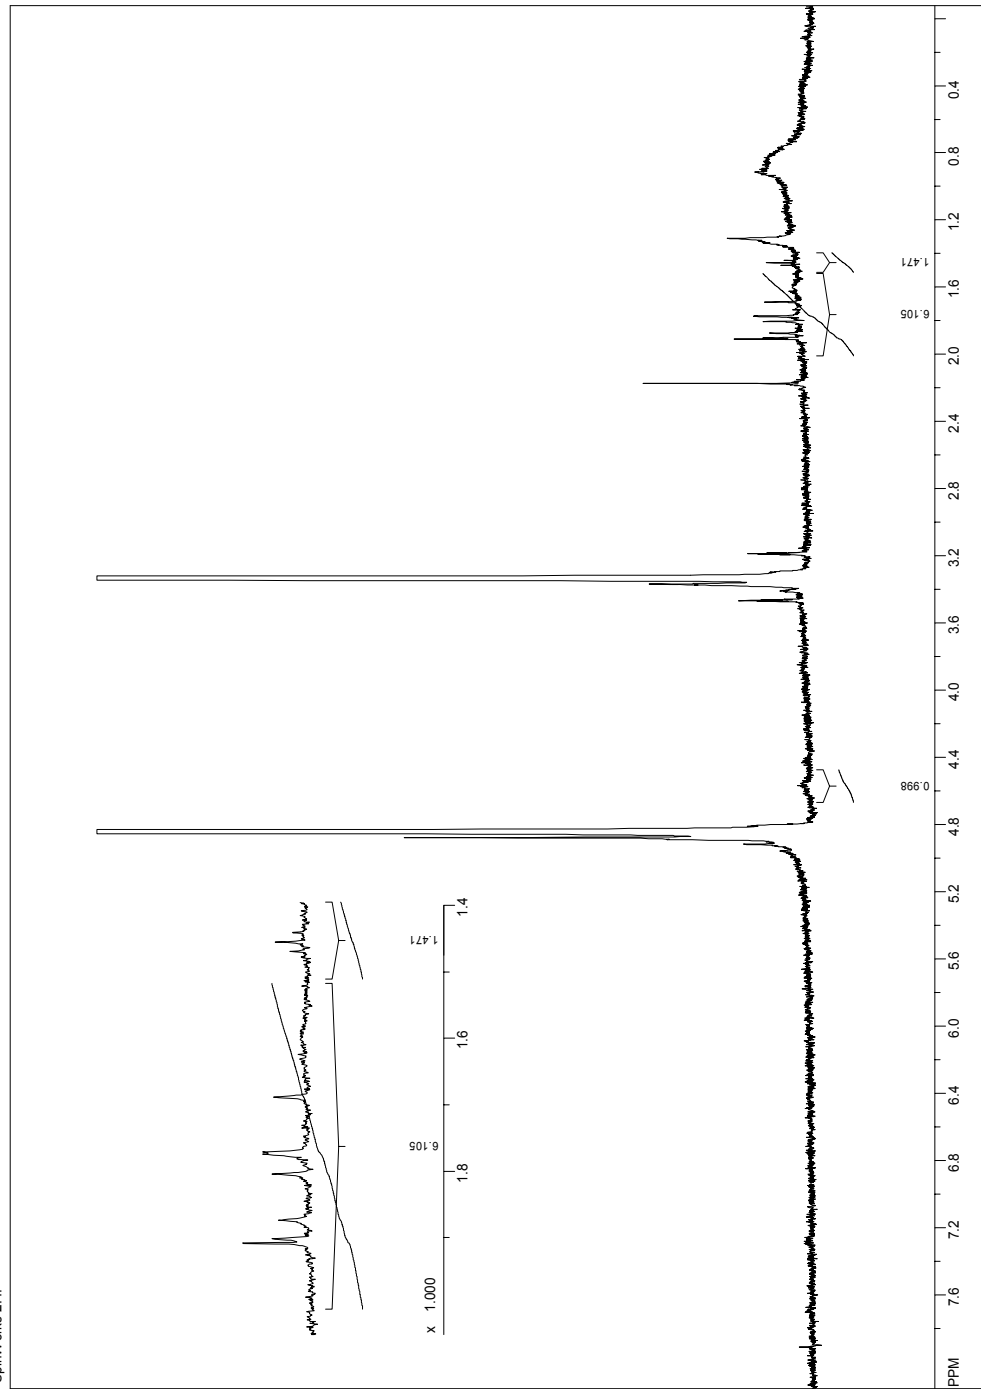

M residue of the decomposed monoester 2-CO<sub>2</sub>Et sample <sup>1</sup>H NMR  
Solvent CD<sub>3</sub>OD

SpinWorks 2.4:

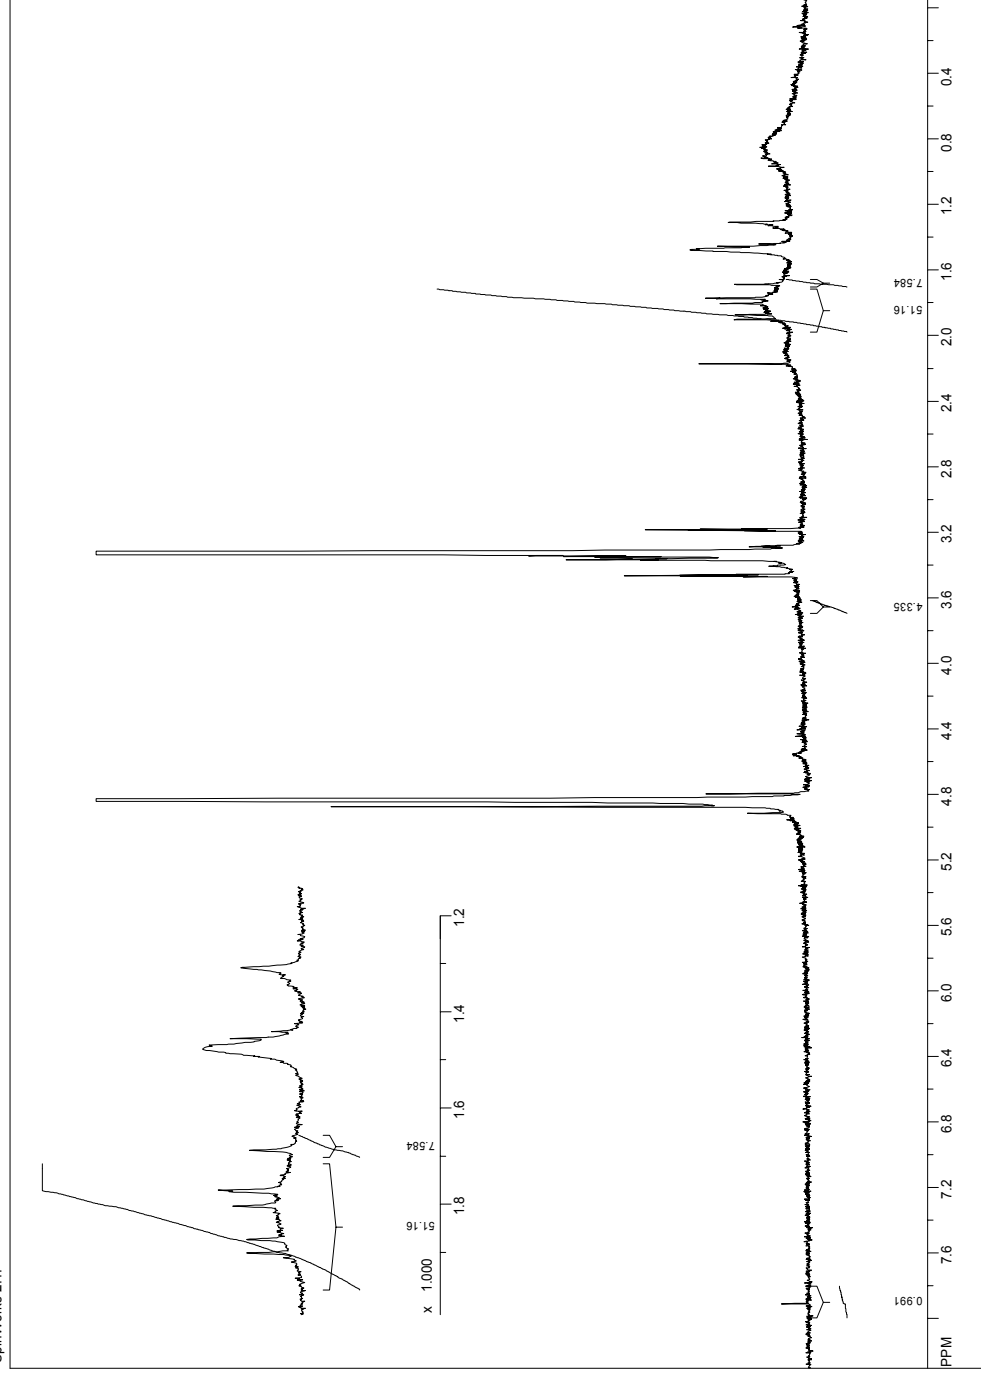

## EPR result for synthesized trityl radicals

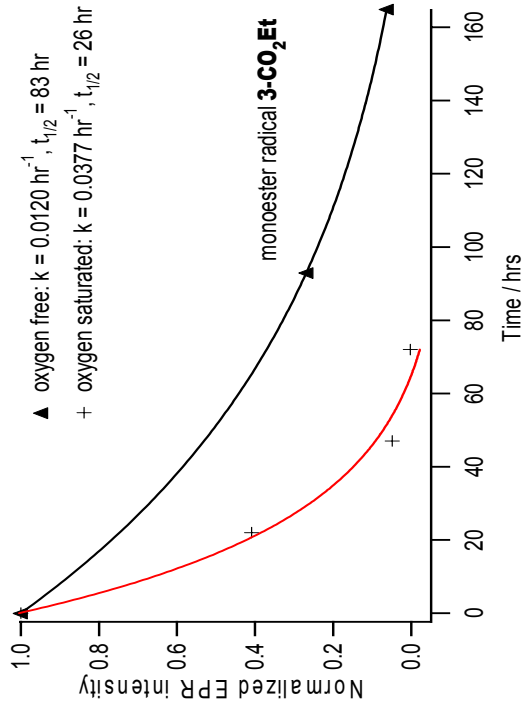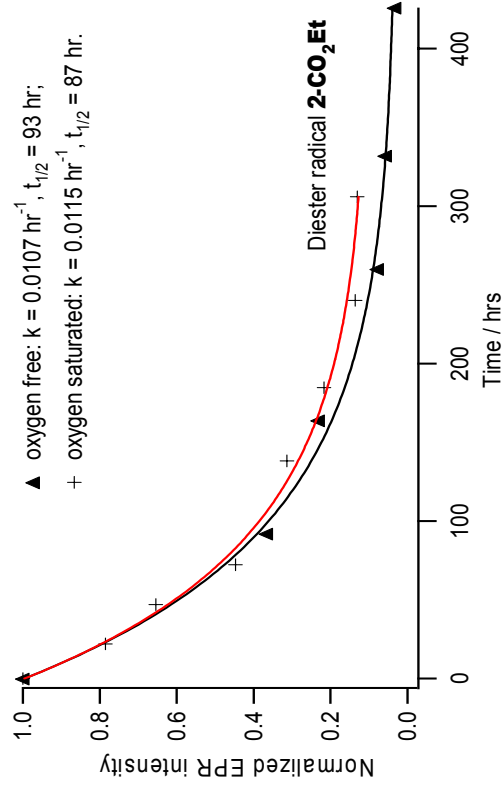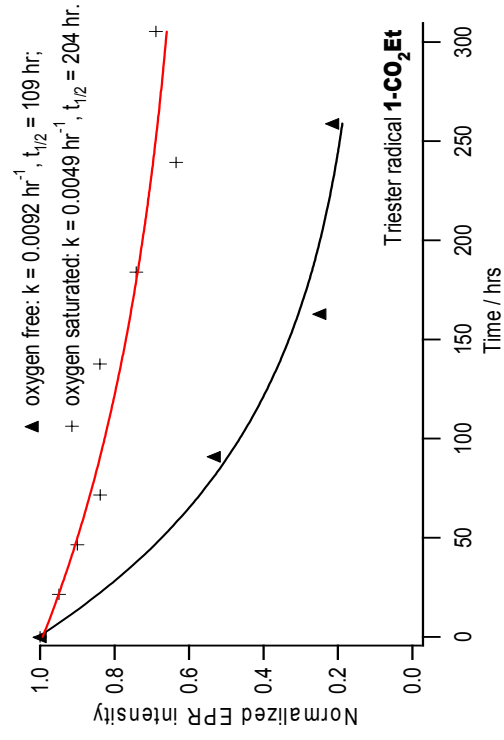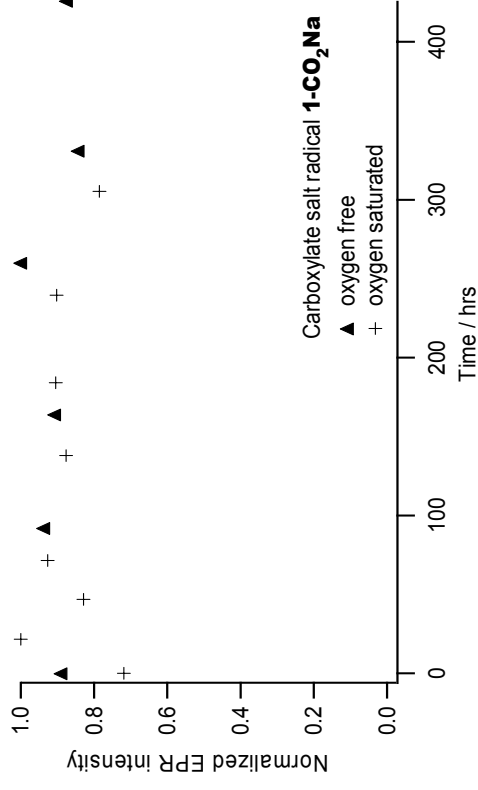

| Trityl radicals                                                                   |               | Monoester 3-CO <sub>2</sub> Et                                                        | Diester 2-CO <sub>2</sub> Et                                                         | Triester 1-CO <sub>2</sub> Et                                                       | Salt 1-CO <sub>2</sub> Na                                                           |
|-----------------------------------------------------------------------------------|---------------|---------------------------------------------------------------------------------------|--------------------------------------------------------------------------------------|-------------------------------------------------------------------------------------|-------------------------------------------------------------------------------------|
| O <sub>2</sub> free                                                               | ΔBpp, G       | 0.40                                                                                  | 0.45                                                                                 | 0.45                                                                                | 0.11                                                                                |
|                                                                                   | Hfcc, G       | 2.29                                                                                  | 2.30                                                                                 | -                                                                                   | -                                                                                   |
|                                                                                   | Integrated SI | 1.159e+008                                                                            | 1.853e+008                                                                           | 3.365e+008                                                                          | 4.311e+007                                                                          |
|                                                                                   | EPR spectra   | 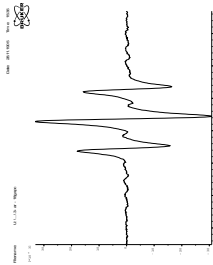   |    |    |    |
| O <sub>2</sub> saturated                                                          | ΔBpp, G       | 1.25                                                                                  | 1.27                                                                                 | 1.22                                                                                | 0.36                                                                                |
|                                                                                   | Hfcc, G       | 2.25                                                                                  | 2.30                                                                                 | -                                                                                   | -                                                                                   |
|                                                                                   | Integrated SI | 1.262e+008                                                                            | 1.762e+008                                                                           | 3.883e+008                                                                          | 5.055e+007                                                                          |
|                                                                                   | EPR spectra   |   |   |   |   |
| O <sub>2</sub> saturated, then purge with Ar to make solution O <sub>2</sub> free | ΔBpp, G       | 0.37                                                                                  | 0.41                                                                                 | 0.45                                                                                | 0.11                                                                                |
|                                                                                   | Hfcc, G       | 2.29                                                                                  | 2.30                                                                                 | -                                                                                   | -                                                                                   |
|                                                                                   | Integrated SI | 2.465e+007                                                                            | 1.375e+008                                                                           | 3.372e+008                                                                          | 4.420e+007                                                                          |
|                                                                                   | EPR spectra   |  |  |  |  |

No O<sub>2</sub>: Salt **1-CO<sub>2</sub>Na**

EPR parameter setting used:

HCF 3523.280000

HSW 2.000000

EMF 3522.575000

RCT 20.480000

RTC 20.480000

RRG 5.023773e+004

RMA 0.010000

MF 9.881777

MP 5.002e-002

MPD 36.0

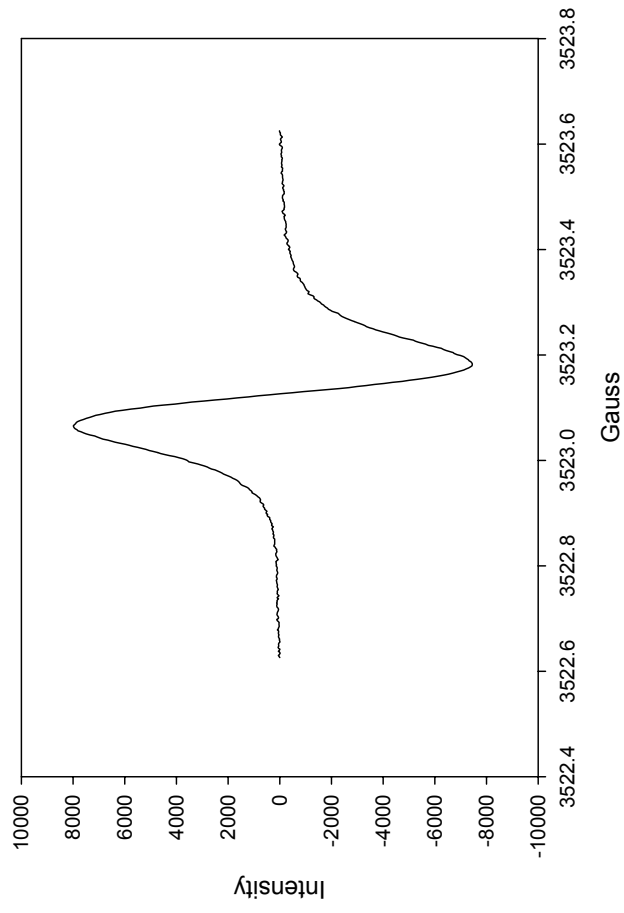

No O<sub>2</sub>: Triester 1-CO<sub>2</sub>Et  
EPR parameter setting used:  
HCF 3523.220000  
HSW 10.000000  
EMF 3522.727000  
RCT 40.960000  
RTC 81.920000  
RRG 4.477442e+004  
RMA 0.010000  
RMF 6.000000  
MF 9.883050  
MP 1.984e+001  
MPD 10.0

Filename: U\...\11-ar-10g.spc  
Date: 18.11.1905  
Time: 10:10

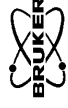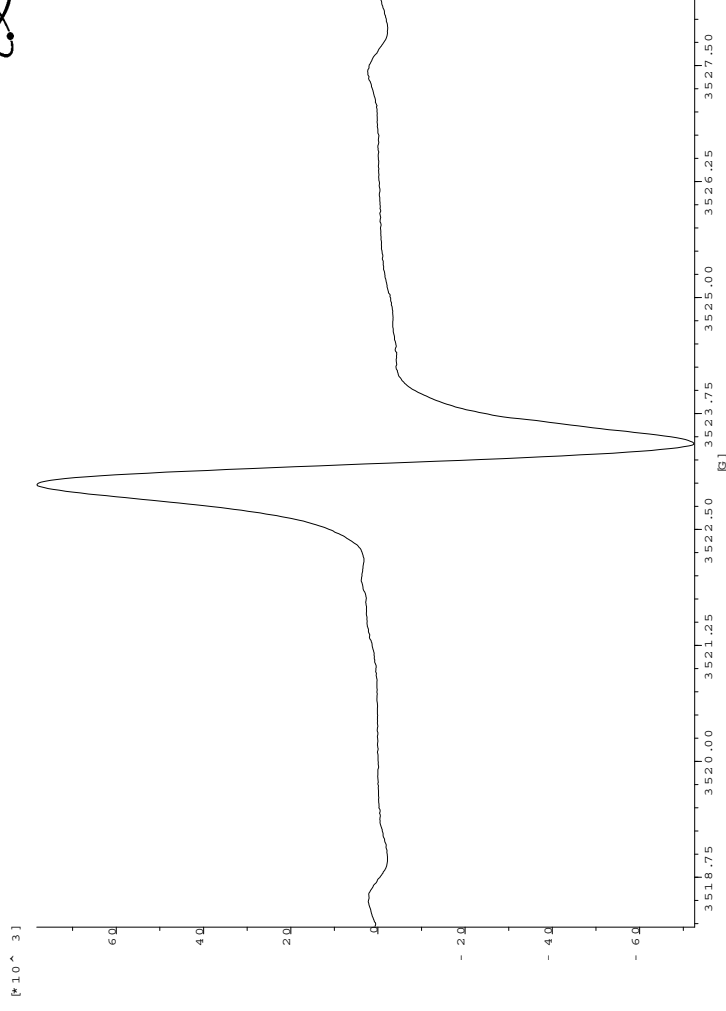



No O<sub>2</sub>: Triester 2-CO<sub>2</sub>Et  
EPR parameter setting used:  
HCF 3522.720000  
HSW 18.000000  
EMF 3522.727000  
RCT 40.960000  
RTC 81.920000  
RRG 1.002374e+005  
RMA 0.010000  
RMF 6.000000  
MF 9.882493  
MP 1.991e+001  
MPD 10.0

Date: 28.11.1906  
Time: 15:32  


Filename: U:\...12-ar-18g.spc

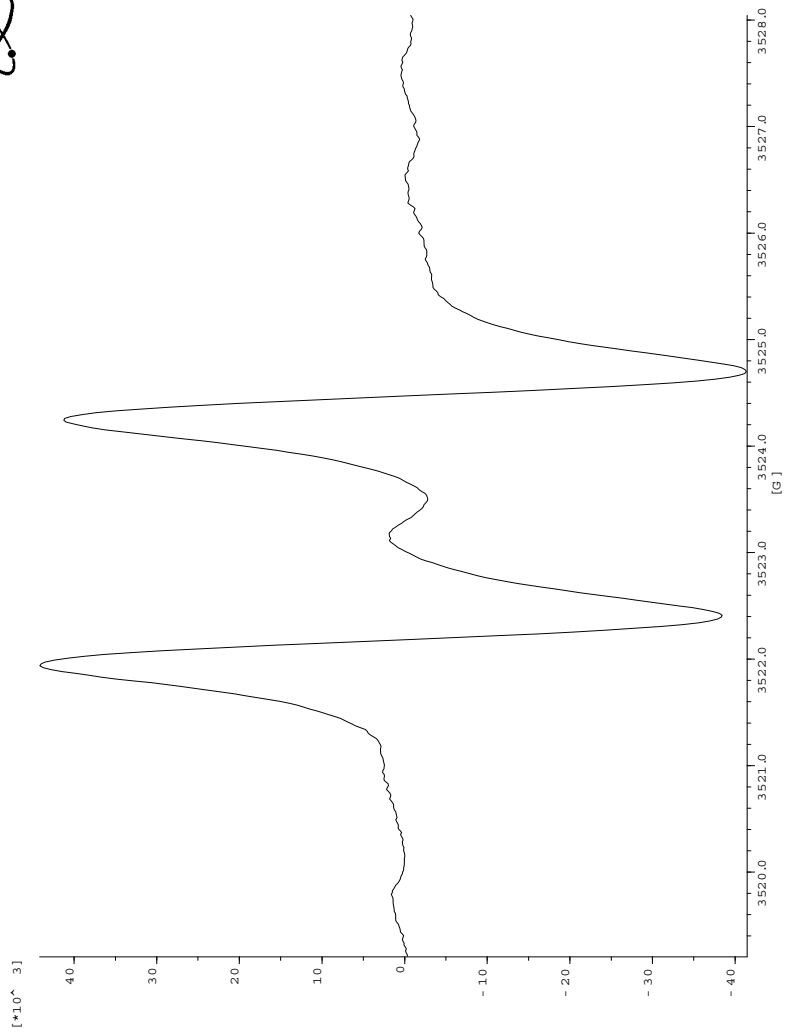

No O<sub>2</sub>: Triester 3-CO<sub>2</sub>Et  
EPR parameter setting used:  
HCF 3522.720000  
HSW 18.000000  
EMF 3522.727000  
RCT 40.960000  
RTC 81.920000  
RRG 1.002374e+005  
RMA 0.010000  
RMF 6.000000  
MF 9.882402  
MP 1.992e+001  
MPD 10.0

Date: 28.11.1905 Time: 15:35  


Filename: UA...13-ar-18g.spc

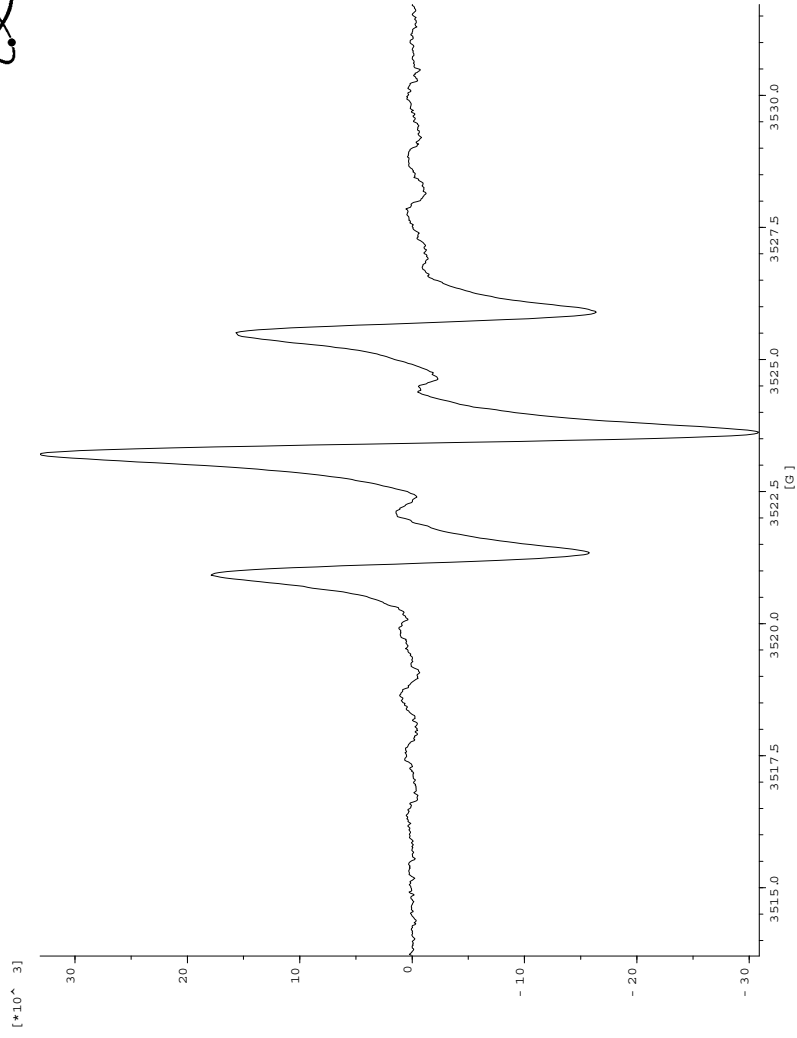

ZPE scaling factor = 0.9806

E: B3LYP/6-31G\*; E\*: B3LYP/6-311+G\*\*//B3LYP/6-31G\* tight, E\*-u: B3LYP/6-311+G\*\*//B3LYP/6-31G\* tight using radii=uff

| Compound                     | 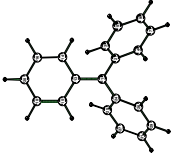 |  |  |  |  |  |  |
|------------------------------|-------------------------------------------------------------------------------------|-------------------------------------------------------------------------------------|-------------------------------------------------------------------------------------|------------------------------------------------------------------------------------|-----------------------------------------------------------------------------------|-----------------------------------------------------------------------------------|-----------------------------------------------------------------------------------|
| <b>name</b>                  | CPh <sub>3</sub>                                                                    | CPh <sub>3</sub> -H                                                                 | CPh <sub>3</sub> <sup>+</sup>                                                       | CPh <sub>3</sub> -a-oo-<br>radical                                                 | CPh <sub>3</sub> -b-oo-<br>radical                                                | CPh <sub>3</sub> -a-oo-<br>radical                                                | CPh <sub>3</sub> -b-oo-<br>radical                                                |
| <b>File name</b>             | CPh3.log                                                                            | cph3-h.log                                                                          | CPh3+.log                                                                           | CPh3-TOO.log                                                                       | CPh3-OO_F.log                                                                     | cph3-oo-h-b.log                                                                   | cph3-oo-h-a.log                                                                   |
| <b>E (gas phase)</b>         | -733.0831877                                                                        | -733.6608949                                                                        | -732.8251123                                                                        | -883.3903784                                                                       | -883.4185288                                                                      | -883.9625959                                                                      | -883.9954135                                                                      |
| <b>E* (gas phase)</b>        | -733.2235689                                                                        | -733.8537802                                                                        | -733.0039531                                                                        | -883.5737653                                                                       | -883.6019292                                                                      | -884.2113575                                                                      | -884.2414497                                                                      |
| <b>&lt;S<sup>2</sup>&gt;</b> | 0.7764                                                                              | 0                                                                                   | 0                                                                                   | 0.7546                                                                             | 0.7542                                                                            | 0                                                                                 | 0                                                                                 |
| <b>N Imag</b>                | 0                                                                                   | 0                                                                                   | 0                                                                                   | 0                                                                                  | 0                                                                                 | 0                                                                                 | 0                                                                                 |

| Compound                     | 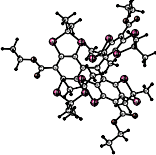 |  |  |  |  |  |  |
|------------------------------|-------------------------------------------------------------------------------------|-------------------------------------------------------------------------------------|-------------------------------------------------------------------------------------|------------------------------------------------------------------------------------|-----------------------------------------------------------------------------------|-----------------------------------------------------------------------------------|-----------------------------------------------------------------------------------|
| <b>name</b>                  | 1-CO <sub>2</sub> Et                                                                | 1-CO <sub>2</sub> Et-H                                                              | 1-CO <sub>2</sub> Et <sup>+</sup>                                                   | 1-CO <sub>2</sub> Et-a-oo-<br>radical                                              | 1-CO <sub>2</sub> Et-b-oo-<br>radical                                             | 1-CO <sub>2</sub> Et-a-oo-<br>radical.log                                         | 1-CO <sub>2</sub> Et-b-oo-<br>radical                                             |
| <b>File name</b>             | SX-5-1-f1-2.log                                                                     | SX-5-1-h.log                                                                        | SX-5-1-+.log                                                                        | SX-5-1-b-oo-<br>radical.log                                                        | SX-5-1-a-oo-<br>radical.log                                                       | SX-5-1-a-oo-<br>radical.log                                                       | SX-5-1-b-oo-<br>radical.log                                                       |
| <b>E (gas phase)</b>         | -7013.281468                                                                        | -7013.904545                                                                        | -7013.067389                                                                        | -7163.561696                                                                       | -7163.567719                                                                      | -7163.567719                                                                      | -7164.196772                                                                      |
| <b>E* (gas phase)</b>        | -7014.209339                                                                        | -7014.834534                                                                        | -7013.98784                                                                         | -7164.540079                                                                       | -7164.543149                                                                      | -7164.543149                                                                      | -7165.181493                                                                      |
| <b>&lt;S<sup>2</sup>&gt;</b> | 0.7719                                                                              | 0                                                                                   | 0                                                                                   | 0.7542                                                                             | 0.7544                                                                            | 0                                                                                 | 0                                                                                 |
| <b>N Imag</b>                | 0                                                                                   | 0                                                                                   | 0                                                                                   | 0                                                                                  | 0                                                                                 | 0                                                                                 | 0                                                                                 |

|                                                                                       |                                                                                       |                                                                                       |                                                                                      |                                                                                     |                                                                                     |                                                                                     |                                                                                     |
|---------------------------------------------------------------------------------------|---------------------------------------------------------------------------------------|---------------------------------------------------------------------------------------|--------------------------------------------------------------------------------------|-------------------------------------------------------------------------------------|-------------------------------------------------------------------------------------|-------------------------------------------------------------------------------------|-------------------------------------------------------------------------------------|
| 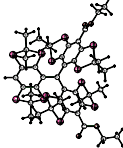   |    |    |    |    |    |    |    |
| <b>Compound</b>                                                                       | <b>Compound</b>                                                                       | <b>Compound</b>                                                                       | <b>Compound</b>                                                                      | <b>Compound</b>                                                                     | <b>Compound</b>                                                                     | <b>Compound</b>                                                                     | <b>Compound</b>                                                                     |
| <b>name</b>                                                                           | <b>name</b>                                                                           | <b>name</b>                                                                           | <b>name</b>                                                                          | <b>name</b>                                                                         | <b>name</b>                                                                         | <b>name</b>                                                                         | <b>name</b>                                                                         |
| 2-CO <sub>2</sub> Et                                                                  | 2-CO <sub>2</sub> Et-H                                                                | 2-CO <sub>2</sub> Et+                                                                 | 2-CO <sub>2</sub> Et-                                                                | 2-CO <sub>2</sub> Et-a-oo-radical                                                   | 2-CO <sub>2</sub> Et-b-oo-radical                                                   | 2-CO <sub>2</sub> Et-a-ooH                                                          | 2-CO <sub>2</sub> Et-b-ooH                                                          |
| SX-5-2-f-2.log                                                                        | SX-5-2-h.log                                                                          | SX-5-2-+.log                                                                          | SX-5-2--.log                                                                         | SX-5-2-a-oo-radical.log                                                             | SX-5-2-b-oo-radical.c.log                                                           | SX-5-2-a-ooH-c.log                                                                  | SX-5-2-a-ooH-c.log                                                                  |
| E (gas phase)                                                                         | E (gas phase)                                                                         | E (gas phase)                                                                         | E (gas phase)                                                                        | E (gas phase)                                                                       | E (gas phase)                                                                       | E (gas phase)                                                                       | E (gas phase)                                                                       |
| -6746.09068                                                                           | -6746.71465                                                                           | -6745.879136                                                                          | -6746.171425                                                                         | -6896.384017                                                                        | -6896.378712                                                                        | -6897.017616                                                                        | -6897.007527                                                                        |
| E* (gas phase)                                                                        | E* (gas phase)                                                                        | E* (gas phase)                                                                        | E* (gas phase)                                                                       | E* (gas phase)                                                                      | E* (gas phase)                                                                      | E* (gas phase)                                                                      | E* (gas phase)                                                                      |
| -6746.939456                                                                          | -6747.565562                                                                          | -6746.720849                                                                          | -6747.031273                                                                         | -6897.283236                                                                        | -6897.275676                                                                        | -6897.923516                                                                        | -6897.910387                                                                        |
| <S <sup>2</sup> >                                                                     | <S <sup>2</sup> >                                                                     | <S <sup>2</sup> >                                                                     | <S <sup>2</sup> >                                                                    | <S <sup>2</sup> >                                                                   | <S <sup>2</sup> >                                                                   | <S <sup>2</sup> >                                                                   | <S <sup>2</sup> >                                                                   |
| 0.773                                                                                 | 0                                                                                     | 0                                                                                     | 0                                                                                    | 0.7539                                                                              | 0.7542                                                                              | 0                                                                                   | 0                                                                                   |
| N Imag                                                                                | N Imag                                                                                | N Imag                                                                                | N Imag                                                                               | N Imag                                                                              | N Imag                                                                              | N Imag                                                                              | N Imag                                                                              |
| 0                                                                                     | 0                                                                                     | 0                                                                                     | 0                                                                                    | 0                                                                                   | 0                                                                                   | 0                                                                                   | 0                                                                                   |
|    |    |    |    |    |    |    |    |
| <b>Compound</b>                                                                       | <b>Compound</b>                                                                       | <b>Compound</b>                                                                       | <b>Compound</b>                                                                      | <b>Compound</b>                                                                     | <b>Compound</b>                                                                     | <b>Compound</b>                                                                     | <b>Compound</b>                                                                     |
| <b>name</b>                                                                           | <b>name</b>                                                                           | <b>name</b>                                                                           | <b>name</b>                                                                          | <b>name</b>                                                                         | <b>name</b>                                                                         | <b>name</b>                                                                         | <b>name</b>                                                                         |
| 3-CO <sub>2</sub> Et                                                                  | 3-CO <sub>2</sub> Et-H                                                                | 3-CO <sub>2</sub> Et+                                                                 | 3-CO <sub>2</sub> Et-                                                                | 3-CO <sub>2</sub> Et-a-oo-radical                                                   | 3-CO <sub>2</sub> Et-b-oo-radical                                                   | 3-CO <sub>2</sub> Et-a-ooH                                                          | 3-CO <sub>2</sub> Et-b-ooH                                                          |
| SX-5-3-f.log                                                                          | SX-5-3-h.log                                                                          | SX-5-3-+.c.log                                                                        | SX-5-3--.log                                                                         | SX-5-3-a-oo-radical.log                                                             | SX-5-3-b-oo-radical.c.log                                                           | 3-CO <sub>2</sub> Et-a-ooH-c.log                                                    | 3-CO <sub>2</sub> Et-b-ooH-c.log                                                    |
| E (gas phase)                                                                         | E (gas phase)                                                                         | E (gas phase)                                                                         | E (gas phase)                                                                        | E (gas phase)                                                                       | E (gas phase)                                                                       | E (gas phase)                                                                       | E (gas phase)                                                                       |
| -6478.898974                                                                          | -6479.523084                                                                          | -6478.689054                                                                          | -6478.974261                                                                         | -6629.192758                                                                        | 6629.18522972                                                                       | -6629.82599714                                                                      | -6629.81777728                                                                      |
| E* (gas phase)                                                                        | E* (gas phase)                                                                        | E* (gas phase)                                                                        | E* (gas phase)                                                                       | E* (gas phase)                                                                      | E* (gas phase)                                                                      | E* (gas phase)                                                                      | E* (gas phase)                                                                      |
| -6479.668457                                                                          | -6480.294718                                                                          | -6479.451354                                                                          | -6479.755129                                                                         | -6630.0127243                                                                       | -6630.0024265                                                                       | -6630.6526992                                                                       | -6630.6412365                                                                       |
| <S <sup>2</sup> >                                                                     | <S <sup>2</sup> >                                                                     | <S <sup>2</sup> >                                                                     | <S <sup>2</sup> >                                                                    | <S <sup>2</sup> >                                                                   | <S <sup>2</sup> >                                                                   | <S <sup>2</sup> >                                                                   | <S <sup>2</sup> >                                                                   |
| 0.7731                                                                                | 0                                                                                     | 0                                                                                     | 0                                                                                    | 0.7542                                                                              | 0.7544                                                                              | 0                                                                                   | 0                                                                                   |
| N Imag                                                                                | N Imag                                                                                | N Imag                                                                                | N Imag                                                                               | N Imag                                                                              | N Imag                                                                              | N Imag                                                                              | N Imag                                                                              |
| 0                                                                                     | 0                                                                                     | 0                                                                                     | 0                                                                                    | 0                                                                                   | 0                                                                                   | 0                                                                                   | 0                                                                                   |
|  |  |  |  |  |  |  |  |
| <b>Compound</b>                                                                       | <b>Compound</b>                                                                       | <b>Compound</b>                                                                       | <b>Compound</b>                                                                      | <b>Compound</b>                                                                     | <b>Compound</b>                                                                     | <b>Compound</b>                                                                     | <b>Compound</b>                                                                     |
| <b>name</b>                                                                           | <b>name</b>                                                                           | <b>name</b>                                                                           | <b>name</b>                                                                          | <b>name</b>                                                                         | <b>name</b>                                                                         | <b>name</b>                                                                         | <b>name</b>                                                                         |
| 4-CO <sub>2</sub> Et                                                                  | 4-CO <sub>2</sub> Et-H                                                                | 4-CO <sub>2</sub> Et+                                                                 | 4-CO <sub>2</sub> Et-                                                                | 4-CO <sub>2</sub> Et-a-oo-radical                                                   | 4-CO <sub>2</sub> Et-b-oo-radical                                                   | 4-CO <sub>2</sub> Et-a-ooH                                                          | 4-CO <sub>2</sub> Et-b-ooH                                                          |
| SX-5-4-c.log                                                                          | SX-5-4-h.log                                                                          | SX-5-4-+-2.log                                                                        | SX-5-4--.log                                                                         | SX-5-4-a-oo-radical.log                                                             | SX-5-4-b-oo-radical.log                                                             | SX-5-4-a-ooH-c.log                                                                  | SX-5-4-a-ooH-c.log                                                                  |
| E (gas phase)                                                                         | E (gas phase)                                                                         | E (gas phase)                                                                         | E (gas phase)                                                                        | E (gas phase)                                                                       | E (gas phase)                                                                       | E (gas phase)                                                                       | E (gas phase)                                                                       |
| -6211.70683                                                                           | -6212.331249                                                                          | -6211.499132                                                                          | -6211.775167                                                                         | -6362.000850                                                                        | -6361.9996473                                                                       | -6362.63412639                                                                      | -6362.628942                                                                        |
| E* (gas phase)                                                                        | E* (gas phase)                                                                        | E* (gas phase)                                                                        | E* (gas phase)                                                                       | E* (gas phase)                                                                      | E* (gas phase)                                                                      | E* (gas phase)                                                                      | E* (gas phase)                                                                      |
| -6212.396936                                                                          | -6213.023479                                                                          | -6212.182128                                                                          | -6212.477034                                                                         | -6362.7415155                                                                       | -6362.737487                                                                        | -6363.3814991                                                                       | -6363.3741495                                                                       |
| <S <sup>2</sup> >                                                                     | <S <sup>2</sup> >                                                                     | <S <sup>2</sup> >                                                                     | <S <sup>2</sup> >                                                                    | <S <sup>2</sup> >                                                                   | <S <sup>2</sup> >                                                                   | <S <sup>2</sup> >                                                                   | <S <sup>2</sup> >                                                                   |
| 0.7734                                                                                | 0                                                                                     | 0                                                                                     | 0                                                                                    | 0.7539                                                                              | 0.7541                                                                              | 0                                                                                   | 0                                                                                   |
| N Imag                                                                                | N Imag                                                                                | N Imag                                                                                | N Imag                                                                               | N Imag                                                                              | N Imag                                                                              | N Imag                                                                              | N Imag                                                                              |
| 0                                                                                     | 0                                                                                     | 0                                                                                     | 0                                                                                    | 0                                                                                   | 0                                                                                   | 0                                                                                   | 0                                                                                   |

| Compound                         | 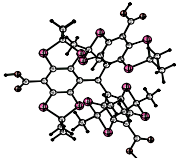 |  |  |  |  |  |  |  |
|----------------------------------|-------------------------------------------------------------------------------------|-------------------------------------------------------------------------------------|-------------------------------------------------------------------------------------|------------------------------------------------------------------------------------|-----------------------------------------------------------------------------------|-----------------------------------------------------------------------------------|-----------------------------------------------------------------------------------|-----------------------------------------------------------------------------------|
| <b>name</b>                      | 1-CO <sub>2</sub> H                                                                 | 1-CO <sub>2</sub> H-H                                                               | 1-CO <sub>2</sub> H+                                                                | 1-CO <sub>2</sub> H-                                                               | 1-CO <sub>2</sub> H-a-oo-<br>radical                                              | 1-CO <sub>2</sub> H-b-oo-<br>radical                                              | 1-CO <sub>2</sub> H-a-ooH                                                         | 1-CO <sub>2</sub> H-b-ooH                                                         |
| <b>File name</b>                 | acid.log                                                                            | trityl-co2h-h-<br>c.log                                                             | acid+.log                                                                           | acid-.log                                                                          | acid-b-oo.log                                                                     | acid-a-oo.log                                                                     | acid-b-ooH.log                                                                    | acid-a-ooH.log                                                                    |
| <b>E (gas phase)</b>             | -6777.402698                                                                        | -6778.025775                                                                        | -6777.182069                                                                        | -6777.492922                                                                       | -6927.681846                                                                      | -6927.688792                                                                      | -6928.31591                                                                       | -6928.320597                                                                      |
| <b>E* (gas phase)</b>            | -6778.286348                                                                        | -6778.911694                                                                        | -6778.057249                                                                        | -6778.38913                                                                        | -6928.61579                                                                       | -6928.61977                                                                       | -6929.257599                                                                      | -6929.25748                                                                       |
| <b>E (PCM H<sub>2</sub>O)</b>    | -6777.361818                                                                        | -6777.986023                                                                        | -6777.156511                                                                        | -6777.484839                                                                       | -6927.63876                                                                       | -6927.657838                                                                      | -6928.275093                                                                      | -6928.291046                                                                      |
| <b>E* (PCM H<sub>2</sub>O)</b>   | -6778.248259                                                                        | -6778.874543                                                                        | -6778.052936                                                                        | -6777.484839                                                                       | -6928.575774                                                                      | -6928.591662                                                                      | -6929.219548                                                                      | -6929.230682                                                                      |
| <b>E*-u (PCM H<sub>2</sub>O)</b> | -6778.229152                                                                        | -6778.855339                                                                        | -6778.034482                                                                        | -6778.379579                                                                       |                                                                                   |                                                                                   |                                                                                   |                                                                                   |
| <b>&lt;S2&gt;</b>                | 0.7718                                                                              | 0                                                                                   | 0                                                                                   | 0                                                                                  | 0.7541                                                                            | 0.7544                                                                            | 0                                                                                 | 0                                                                                 |
| <b>N Imag</b>                    | 0                                                                                   | 0                                                                                   | 0                                                                                   | 0                                                                                  | 0                                                                                 | 0                                                                                 | 0                                                                                 | 0                                                                                 |

| Compound                       | 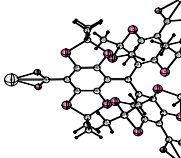 |  |  |  |  |  |  |  |
|--------------------------------|-------------------------------------------------------------------------------------|-------------------------------------------------------------------------------------|-------------------------------------------------------------------------------------|------------------------------------------------------------------------------------|-----------------------------------------------------------------------------------|-----------------------------------------------------------------------------------|-----------------------------------------------------------------------------------|-----------------------------------------------------------------------------------|
| <b>name</b>                    | 1-CO <sub>2</sub> Na                                                                | 1-CO <sub>2</sub> Na-H                                                              | 1-CO <sub>2</sub> Na+                                                               | 1-CO <sub>2</sub> Na-                                                              | 1-CO <sub>2</sub> Na-a-oo-<br>radical                                             | 1-CO <sub>2</sub> Na-b-oo-<br>radical                                             | 1-CO <sub>2</sub> Na-a-ooH                                                        | 1-CO <sub>2</sub> Na-b-ooH                                                        |
| <b>File name</b>               | salt.log                                                                            | salt-h.log                                                                          | salt+.log                                                                           | salt-.log                                                                          | salt-b-oo.log                                                                     | salt-a-oo.log                                                                     | salt-b-ooH-4.log                                                                  | salt-a-ooH.log                                                                    |
| <b>E (gas phase)</b>           | -7262.696867                                                                        | -7263.319713                                                                        | -7262.515716                                                                        | -7262.748859                                                                       | -7412.980617                                                                      | -7412.985398                                                                      | -7413.618236                                                                      | -7413.616918                                                                      |
| <b>E* (gas phase)</b>          | -7263.582238                                                                        | -7264.207191                                                                        | -7263.394058                                                                        | -7263.644019                                                                       | -7413.915737                                                                      | -7413.917954                                                                      | -7414.560445                                                                      | -7414.555404                                                                      |
| <b>E (PCM H<sub>2</sub>O)</b>  | -7262.772424                                                                        | -7263.396405                                                                        | -7262.604191                                                                        | -7262.889913                                                                       | -7413.053578                                                                      | -7413.069955                                                                      | -7413.689429                                                                      | -7413.703468                                                                      |
| <b>E* (PCM H<sub>2</sub>O)</b> | -7263.66177                                                                         | -7264.287852                                                                        | -7263.486813                                                                        | -7263.788356                                                                       | -7413.993318                                                                      | -7414.006859                                                                      | -7414.636084                                                                      | -7414.646172                                                                      |
| <b>&lt;S2&gt;</b>              | 0.7722                                                                              | 0                                                                                   | 0                                                                                   | 0                                                                                  | 0.7545                                                                            | 0.7544                                                                            | 0                                                                                 | 0                                                                                 |
| <b>N Imag</b>                  | 0                                                                                   | 0                                                                                   | 0                                                                                   | 0                                                                                  | 0                                                                                 | 0                                                                                 | 0                                                                                 | 0                                                                                 |

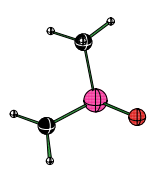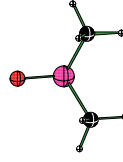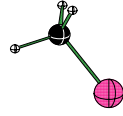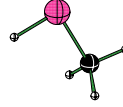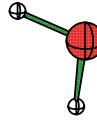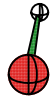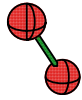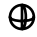

Compound

| name                        | H radical     | Molecular oxygen | Hydroxyl radical | Water       | Methylthiol  | CH <sub>3</sub> S radical | DMSO         | CH <sub>2</sub> SOCH <sub>3</sub> radical |
|-----------------------------|---------------|------------------|------------------|-------------|--------------|---------------------------|--------------|-------------------------------------------|
| File name                   | H-radical.log | o2-triple.log    | oh-1.log         | h2o.log     | ch3sh.log    | ch3s.log                  | dmso.log     | dmso-radical.log                          |
| E* (gas phase)              | -0.5002728    | -150.3200421     | -75.7234548      | -76.4089533 | -438.6983484 | -438.0597245              | -553.1869359 | -552.5149959                              |
| E* (gas phase)              | -0.5021559    | -150.3719978     | -75.7630261      | -76.4590669 | -438.7441885 | -438.1013432              | -553.2699593 | -552.5973948                              |
| E (PCM H <sub>2</sub> O)    | -0.5003019    | -150.3202085     | -75.730291       | -76.417569  | -438.697705  | -438.056683               | -553.188212  | -552.516801                               |
| E* (PCM H <sub>2</sub> O)   | -0.5022133    | -150.3723549     | -75.771165       | -76.469456  | -438.7437    | -438.098157               | -553.274386  | -552.602071                               |
| E*-u (PCM H <sub>2</sub> O) | -0.498319     | -150.367882      | -75.765523       | -76.465217  | -438.743619  | -438.100625               | -553.278113  | -552.604491                               |
| <S <sup>2</sup> >           | 0.75          | 0                | 0.752            | 0           | 0            | 0.7525                    | 0            | 0.7561                                    |
| N Imag                      | 0             | 0                | 0                | 0           | 0            | 0                         | 0            | 0                                         |

## B3LYP/6-31G\* Optimized Geometries

**1-CO<sub>2</sub>Et:**  
Structure

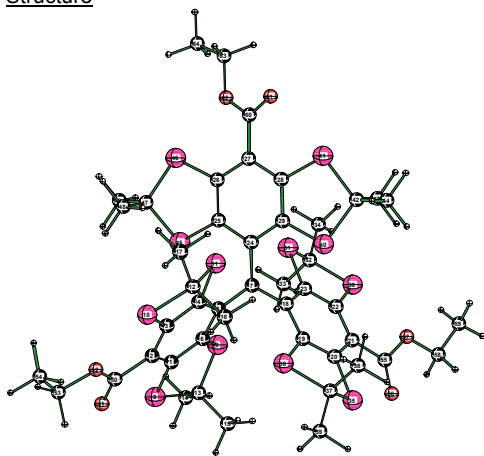

Coordinates

|   |           |           |           |
|---|-----------|-----------|-----------|
| C | -2.566276 | -2.612513 | -1.255456 |
| C | -3.666529 | -2.359089 | -0.404673 |
| C | -3.540600 | -1.359869 | 0.593796  |
| C | -2.365777 | -0.597005 | 0.688948  |
| C | -1.251870 | -0.834325 | -0.163107 |
| C | -1.389801 | -1.847774 | -1.144262 |
| C | -0.007550 | -0.051127 | -0.034856 |
| S | -2.597805 | -3.829860 | -2.547434 |
| S | -0.188938 | -2.092330 | -2.426313 |
| S | -4.802132 | -0.976939 | 1.794912  |
| S | -2.352527 | 0.665652  | 1.940585  |
| C | -3.672742 | -0.104010 | 2.977240  |
| C | -0.771453 | -3.778375 | -2.901419 |
| C | -0.552825 | -3.981175 | -4.405015 |
| C | -0.045842 | -4.851628 | -2.079841 |
| C | -3.068834 | -1.099837 | 3.974848  |
| C | -4.457015 | 0.999653  | 3.695288  |
| C | 1.298893  | -0.730584 | -0.015392 |
| C | 1.501666  | -1.934520 | 0.709099  |
| C | 2.752213  | -2.574821 | 0.728055  |
| C | 3.845163  | -2.039971 | 0.014671  |
| C | 3.659809  | -0.850190 | -0.721526 |
| C | 2.412734  | -0.204097 | -0.723908 |
| C | -0.075176 | 1.417334  | 0.108907  |
| C | -0.857035 | 2.209466  | -0.775655 |
| C | -0.925709 | 3.607902  | -0.650014 |
| C | -0.211338 | 4.265628  | 0.375938  |
| C | 0.559690  | 3.494961  | 1.273335  |
| C | 0.630349  | 2.097338  | 1.137670  |
| S | 4.930526  | -0.088317 | -1.712149 |
| S | 2.321596  | 1.284939  | -1.696006 |
| C | 3.757183  | 0.863731  | -2.785138 |
| C | 3.303621  | 0.017131  | -3.979700 |
| C | 4.435768  | 2.159435  | -3.241053 |
| S | 2.865295  | -4.065185 | 1.692487  |
| S | 0.228154  | -2.727776 | 1.666008  |
| C | 1.394289  | -3.670815 | 2.751474  |
| C | 1.810426  | -2.825968 | 3.961364  |
| C | 0.726741  | -4.979590 | 3.186002  |
| S | 1.499548  | 1.247044  | 2.429187  |
| S | 1.429200  | 4.199163  | 2.652431  |
| C | 2.501145  | 2.711995  | 2.951956  |
| C | 3.793818  | 2.802694  | 2.131927  |
| C | 2.796269  | 2.609199  | 4.452320  |
| S | -1.661686 | 1.522070  | -2.200177 |

**2-CO<sub>2</sub>Et:**  
Structure

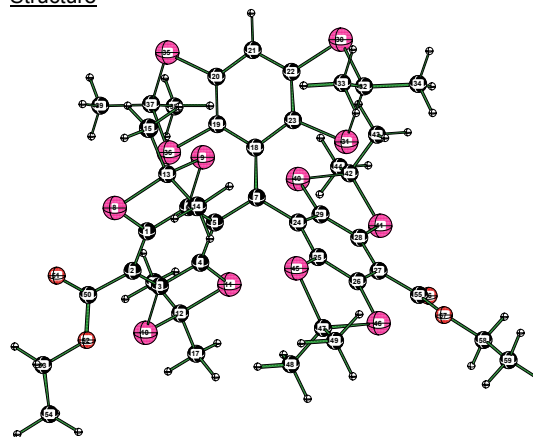

Coordinates

|   |           |           |           |
|---|-----------|-----------|-----------|
| C | -3.528711 | -0.271065 | 1.083609  |
| C | -3.878633 | -1.301289 | 0.185400  |
| C | -2.929683 | -1.723006 | -0.771831 |
| C | -1.654961 | -1.134663 | -0.813987 |
| C | -1.291053 | -0.082280 | 0.069865  |
| C | -2.259931 | 0.330252  | 1.024286  |
| C | 0.033041  | 0.556214  | 0.001493  |
| S | -4.632688 | 0.334685  | 2.338045  |
| S | -1.952687 | 1.593486  | 2.237901  |
| S | -3.244194 | -2.977449 | -1.998624 |
| S | -0.551460 | -1.773181 | -2.054633 |
| C | -1.889585 | -2.439954 | -3.144116 |
| C | -3.288247 | 1.048736  | 3.398502  |
| C | -2.756418 | -0.005154 | 4.377362  |
| C | -3.837667 | 2.272721  | 4.139121  |
| C | -2.390153 | -1.360079 | -4.110260 |
| C | -1.358318 | -3.663358 | -3.898319 |
| C | 0.138631  | 2.018539  | 0.082352  |
| C | -0.770659 | 2.868558  | -0.611361 |
| C | -0.675964 | 4.265775  | -0.506497 |
| C | 0.306073  | 4.861020  | 0.282116  |
| C | 1.214286  | 4.050263  | 0.960169  |
| C | 1.150806  | 2.651617  | 0.859414  |
| C | 1.250068  | -0.266685 | -0.144329 |
| C | 1.496073  | -1.382555 | 0.699955  |
| C | 2.650910  | -2.172220 | 0.563161  |
| C | 3.610462  | -1.863507 | -0.427273 |
| C | 3.380517  | -0.761570 | -1.280243 |
| C | 2.222079  | 0.022452  | -1.137869 |
| S | 2.516848  | 4.729653  | 1.957879  |
| S | 2.398661  | 1.782078  | 1.782353  |
| C | 2.760376  | 3.180706  | 2.954128  |
| C | 1.797178  | 3.145923  | 4.145311  |
| C | 4.220488  | 3.087149  | 3.404370  |
| S | -1.878895 | 5.225616  | -1.391243 |
| S | -2.064221 | 2.289434  | -1.688068 |
| C | -2.257273 | 3.887519  | -2.621524 |
| C | -1.279810 | 3.947461  | -3.800157 |
| C | -3.710808 | 4.017162  | -3.085095 |
| S | 1.977367  | 1.263028  | -2.381627 |
| S | 4.468559  | -0.324347 | -2.614153 |
| C | 3.761068  | 1.376718  | -2.856885 |
| C | 4.490439  | 2.395545  | -1.972827 |
| C | 3.862552  | 1.747231  | -4.340434 |
| S | 0.458586  | -1.768590 | 2.088738  |
| S | 2.809448  | -3.510682 | 1.726838  |

|   |           |           |           |   |           |           |           |
|---|-----------|-----------|-----------|---|-----------|-----------|-----------|
| S | -1.910662 | 4.443220  | -1.875474 | C | 1.022602  | -3.523278 | 2.225896  |
| C | -2.839367 | 2.931284  | -2.417544 | C | 0.207739  | -4.431096 | 1.297091  |
| C | -4.092726 | 2.730877  | -1.558038 | C | 0.917203  | -3.973816 | 3.686594  |
| C | -3.191346 | 3.068072  | -3.902445 | C | -5.244340 | -1.874811 | 0.286900  |
| C | -4.920427 | -3.106285 | -0.670158 | O | -6.190015 | -1.294886 | 0.790399  |
| O | -5.038682 | -3.947403 | -1.546405 | O | -5.333386 | -3.125178 | -0.208763 |
| O | -5.949476 | -2.747292 | 0.120833  | C | -6.649794 | -3.727499 | -0.183746 |
| C | -7.203997 | -3.429549 | -0.115281 | C | -6.524952 | -5.124875 | -0.759786 |
| C | -8.220211 | -2.873215 | 0.863520  | C | 4.846301  | -2.657563 | -0.644097 |
| C | 5.132497  | -2.778723 | 0.058656  | O | 5.483688  | -2.651852 | -1.682920 |
| O | 5.225479  | -3.968901 | 0.301561  | O | 5.217741  | -3.374571 | 0.433917  |
| O | 6.202586  | -1.991809 | -0.168488 | C | 6.392287  | -4.206087 | 0.272150  |
| C | 7.489658  | -2.655389 | -0.187365 | C | 6.638310  | -4.913820 | 1.590640  |
| C | 8.550553  | -1.590903 | -0.391195 | H | -1.952311 | 0.418394  | 4.990774  |
| C | -0.248406 | 5.735849  | 0.584282  | H | -2.358566 | -0.872405 | 3.843091  |
| O | 0.022266  | 6.278640  | 1.641285  | H | -3.562201 | -0.344511 | 5.039243  |
| O | -0.586393 | 6.423929  | -0.522774 | H | -3.055466 | 2.723155  | 4.761370  |
| C | -0.681142 | 7.861664  | -0.375385 | H | -4.655867 | 1.972696  | 4.804284  |
| C | -1.049016 | 8.438445  | -1.728741 | H | -4.210658 | 3.027301  | 3.442373  |
| H | 0.517436  | -3.950004 | -4.640612 | H | -1.576037 | -1.040722 | -4.771120 |
| H | -1.066409 | -3.215276 | -4.991325 | H | -2.753938 | -0.483612 | -3.567356 |
| H | -0.928219 | -4.965294 | -4.708621 | H | -3.208485 | -1.754416 | -4.724609 |
| H | 1.030781  | -4.826463 | -2.285476 | H | -2.147956 | -4.090157 | -4.527769 |
| H | -0.429667 | -5.845194 | -2.341215 | H | -1.002535 | -4.434491 | -3.210546 |
| H | -0.192146 | -4.694911 | -1.007797 | H | -0.532729 | -3.370732 | -4.557074 |
| H | -2.391818 | -0.579670 | 4.662535  | H | 0.365039  | 5.941807  | 0.364241  |
| H | -2.500489 | -1.877452 | 3.457889  | H | 1.929090  | 2.212733  | 4.705203  |
| H | -3.864559 | -1.578510 | 4.558280  | H | 0.757196  | 3.201261  | 3.812617  |
| H | -5.268091 | 0.560863  | 4.288128  | H | 1.995696  | 3.991042  | 4.815008  |
| H | -4.886526 | 1.711912  | 2.986602  | H | 4.383540  | 2.156074  | 3.959054  |
| H | -3.799568 | 1.541842  | 4.384416  | H | 4.460613  | 3.919072  | 4.076459  |
| H | 2.592401  | 0.581763  | -4.593583 | H | 4.904873  | 3.113815  | 2.552877  |
| H | 2.814446  | -0.902328 | -3.647185 | H | -1.488848 | 3.132912  | -4.503532 |
| H | 4.166939  | -0.253078 | -4.599644 | H | -0.245667 | 3.849491  | -3.459333 |
| H | 3.745310  | 2.751413  | -3.852689 | H | -1.383909 | 4.902969  | -4.327745 |
| H | 5.310872  | 1.929220  | -3.859921 | H | -3.955869 | 3.209802  | -3.784819 |
| H | 4.757557  | 2.763957  | -2.389372 | H | -3.853184 | 4.966660  | -3.614000 |
| H | 0.934151  | -2.580410 | 4.572791  | H | -4.405037 | 3.974426  | -2.242565 |
| H | 2.279854  | -1.890486 | 3.644898  | H | 5.552949  | 2.432246  | -2.242074 |
| H | 2.525728  | -3.381484 | 4.579531  | H | 4.409108  | 2.131752  | -0.914816 |
| H | -0.160572 | -4.770018 | 3.794753  | H | 4.058325  | 3.393814  | -2.109613 |
| H | 1.418011  | -5.566724 | 3.801717  | H | 4.914389  | 1.784797  | -4.646669 |
| H | 0.427425  | -5.582313 | 2.324955  | H | 3.433363  | 2.741120  | -4.513082 |
| H | 4.359592  | 3.695991  | 2.422998  | H | 3.340382  | 1.022924  | -4.970562 |
| H | 3.580912  | 2.860648  | 1.061070  | H | 0.579179  | -5.461093 | 1.359506  |
| H | 4.417951  | 1.918873  | 2.308739  | H | 0.276008  | -4.099293 | 0.257545  |
| H | 3.355974  | 3.490993  | 4.785085  | H | -0.848633 | -4.419587 | 1.589692  |
| H | 3.416361  | 1.728717  | 4.657196  | H | 1.281779  | -5.002355 | 3.790469  |
| H | 1.876448  | 2.537539  | 5.038002  | H | -0.130216 | -3.961899 | 4.009511  |
| H | -4.763020 | 3.592090  | -1.666463 | H | 1.497604  | -3.326932 | 4.349133  |
| H | -3.834913 | 2.622382  | -0.501178 | H | -7.332086 | -3.099019 | -0.764863 |
| H | -4.627442 | 1.828113  | -1.874964 | H | -7.006118 | -3.736182 | 0.850821  |
| H | -3.864267 | 3.920362  | -4.052294 | H | -5.828377 | -5.729728 | -0.170741 |
| H | -3.714267 | 2.169463  | -4.249169 | H | -6.165161 | -5.092329 | -1.792683 |
| H | -2.298094 | 3.213726  | -4.514885 | H | -7.504051 | -5.616271 | -0.748593 |
| H | -7.045548 | -4.504157 | 0.018236  | H | 7.231186  | -3.565963 | -0.017451 |
| H | -7.498108 | -3.264564 | -1.156468 | H | 6.211213  | -4.908318 | -0.547663 |
| H | -8.354638 | -1.796704 | 0.718773  | H | 6.803892  | -4.192542 | 2.397042  |
| H | -7.904004 | -3.045573 | 1.896872  | H | 7.527443  | -5.548368 | 1.506617  |
| H | -9.186257 | -3.366508 | 0.709684  | H | 5.786453  | -5.545129 | 1.861296  |
| H | 7.487100  | -3.397299 | -0.992320 |   |           |           |           |
| H | 7.616149  | -3.190830 | 0.758276  |   |           |           |           |
| H | 9.541920  | -2.057064 | -0.402624 |   |           |           |           |
| H | 8.524812  | -0.854214 | 0.417875  |   |           |           |           |
| H | 8.403537  | -1.066347 | -1.340197 |   |           |           |           |
| H | 0.281549  | 8.235430  | -0.013576 |   |           |           |           |
| H | -1.432740 | 8.084383  | 0.388526  |   |           |           |           |
| H | -0.291719 | 8.189663  | -2.478764 |   |           |           |           |
| H | -1.118409 | 9.529414  | -1.656354 |   |           |           |           |
| H | -2.013946 | 8.052036  | -2.070918 |   |           |           |           |



**3-CO<sub>2</sub>Et:**  
Structure

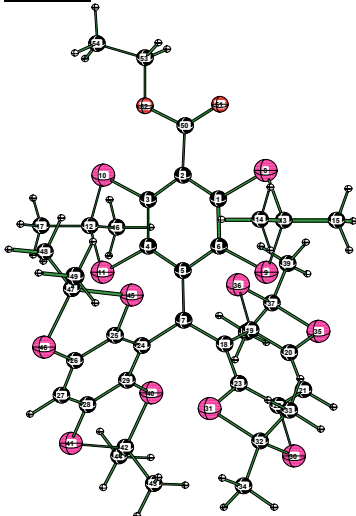

**Coordinates**

|   |           |           |           |
|---|-----------|-----------|-----------|
| C | 2.865442  | -1.386634 | 0.969600  |
| C | 3.735250  | -0.648357 | 0.138918  |
| C | 3.187083  | 0.312770  | -0.739944 |
| C | 1.802083  | 0.539940  | -0.766784 |
| C | 0.909604  | -0.200757 | 0.055016  |
| C | 1.477507  | -1.169376 | 0.925037  |
| C | -0.542797 | 0.030536  | 0.009969  |
| S | 3.436487  | -2.622944 | 2.111239  |
| S | 0.507276  | -2.156235 | 2.041010  |
| S | 4.151724  | 1.283258  | -1.882406 |
| S | 1.242951  | 1.784749  | -1.908138 |
| C | 2.731543  | 1.688952  | -3.002762 |
| C | 1.911579  | -2.587359 | 3.168098  |
| C | 2.052213  | -1.540137 | 4.279704  |
| C | 1.676404  | -3.987133 | 3.746284  |
| C | 2.554512  | 0.599716  | -4.067559 |
| C | 2.973769  | 3.060255  | -3.641890 |
| C | -1.464477 | -1.112250 | -0.024900 |
| C | -1.212435 | -2.245910 | -0.849497 |
| C | -2.098223 | -3.335597 | -0.869359 |
| C | -3.243641 | -3.343145 | -0.076494 |
| C | -3.513014 | -2.242971 | 0.735643  |
| C | -2.651368 | -1.135449 | 0.761635  |
| C | -1.071707 | 1.407077  | 0.005860  |
| C | -0.612638 | 2.383453  | 0.934239  |
| C | -1.124076 | 3.691590  | 0.921991  |
| C | -2.096427 | 4.071564  | -0.000908 |
| C | -2.560619 | 3.134075  | -0.921751 |
| C | -2.064429 | 1.820269  | -0.927246 |
| S | -4.966053 | -2.157406 | 1.753482  |
| S | -3.154401 | 0.176515  | 1.852677  |
| C | -4.259191 | -0.884923 | 2.908534  |
| C | -3.451932 | -1.556386 | 4.024294  |
| C | -5.390107 | -0.020321 | 3.471259  |
| S | -1.671139 | -4.704453 | -1.915751 |
| S | 0.185353  | -2.400940 | -1.940038 |
| C | -0.574610 | -3.703181 | -3.030884 |
| C | -1.393709 | -3.055640 | -4.152211 |
| C | 0.538903  | -4.596094 | -3.584991 |
| S | -2.641982 | 0.810628  | -2.270124 |
| S | -3.714541 | 3.567308  | -2.197412 |
| C | -4.173382 | 1.811134  | -2.601200 |
| C | -5.328433 | 1.339196  | -1.711478 |
| C | -4.523776 | 1.706686  | -4.088084 |
| S | 0.498344  | 2.030396  | 2.274933  |

**4-CO<sub>2</sub>Et:**  
Structure

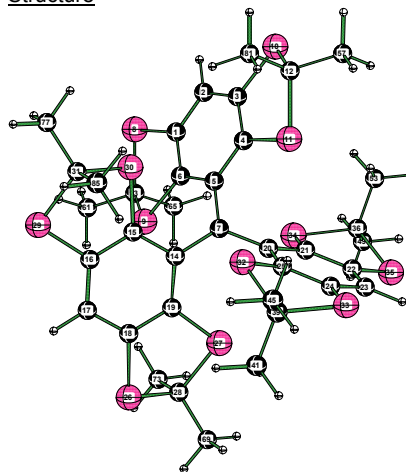

**Coordinates**

|   |           |           |           |
|---|-----------|-----------|-----------|
| C | -2.710516 | -2.570352 | -0.732111 |
| C | -3.722629 | -2.187989 | 0.145628  |
| C | -3.524203 | -1.078500 | 0.965489  |
| C | -2.326843 | -0.347556 | 0.915896  |
| C | -1.269960 | -0.731139 | 0.043451  |
| C | -1.498469 | -1.863249 | -0.789161 |
| C | -0.000048 | 0.007038  | -0.000140 |
| S | -2.872341 | -3.979723 | -1.800193 |
| S | -0.333580 | -2.472615 | -1.989396 |
| S | -4.773210 | -0.502516 | 2.089171  |
| S | -2.251004 | 1.040985  | 2.025583  |
| C | -3.579965 | 0.423782  | 3.171552  |
| C | -1.587609 | -3.396464 | -3.007440 |
| C | 1.268799  | -0.732940 | -0.043853 |
| C | 1.495653  | -1.865615 | 0.788459  |
| C | 2.706805  | -2.574251 | 0.731455  |
| C | 3.719641  | -2.192882 | -0.145887 |
| C | 3.522825  | -1.082902 | -0.965475 |
| C | 2.326352  | -0.350505 | -0.916004 |
| C | 0.001035  | 1.481529  | 0.000059  |
| C | -0.825102 | 2.226432  | -0.887245 |
| C | -0.815585 | 3.630845  | -0.879281 |
| C | 0.003221  | 4.336603  | 0.000330  |
| C | 0.820930  | 3.629419  | 0.879831  |
| C | 0.828277  | 2.224999  | 0.887540  |
| S | 4.772876  | -0.508066 | -2.088590 |
| S | 2.252441  | 1.038339  | -2.025442 |
| C | 3.581052  | 0.419855  | -3.171154 |
| S | 2.866625  | -3.984125 | 1.799185  |
| S | 0.329753  | -2.473829 | 1.988308  |
| C | 1.582434  | -3.399521 | 3.006362  |
| S | 1.802902  | 1.490366  | 2.178575  |
| S | 1.814025  | 4.447806  | 2.100840  |
| S | -1.801024 | 1.493572  | -2.178329 |
| S | -1.807545 | 4.450965  | -2.100065 |
| C | -2.890194 | 2.977584  | -2.439678 |
| H | 4.649581  | -2.751136 | -0.189237 |
| H | 0.004051  | 5.422252  | 0.000435  |
| C | 2.894253  | 2.972676  | 2.440579  |
| H | -4.653248 | -2.745105 | 0.189076  |
| C | 4.083169  | 2.941910  | 1.474137  |
| H | 4.702147  | 3.836384  | 1.612484  |
| H | 4.697701  | 2.054515  | 1.665036  |
| H | 3.747782  | 2.906297  | 0.434211  |
| C | 3.352890  | 3.003869  | 3.901021  |

|   |           |           |           |
|---|-----------|-----------|-----------|
| S | -0.549107 | 4.794704  | 2.186779  |
| C | 0.973000  | 3.801555  | 2.579499  |
| C | 2.133391  | 4.212558  | 1.666701  |
| C | 1.325528  | 3.976293  | 4.059125  |
| C | 5.187664  | -0.942533 | 0.221558  |
| O | 5.647852  | -1.986371 | 0.649818  |
| O | 5.961983  | 0.077027  | -0.200715 |
| C | 7.389436  | -0.164449 | -0.197813 |
| C | 8.065118  | 1.076476  | -0.748950 |
| H | 1.141476  | -1.509102 | 4.889648  |
| H | 2.218723  | -0.543369 | 3.862127  |
| H | 2.900713  | -1.790686 | 4.927742  |
| H | 0.768637  | -3.996950 | 4.360917  |
| H | 2.515218  | -4.272164 | 4.392055  |
| H | 1.573470  | -4.733402 | 2.954869  |
| H | 1.705978  | 0.843199  | -4.717600 |
| H | 2.365338  | -0.373985 | -3.607495 |
| H | 3.459285  | 0.524922  | -4.682767 |
| H | 2.127707  | 3.330849  | -4.283948 |
| H | 3.870273  | 3.029295  | -4.272089 |
| H | 3.102974  | 3.838139  | -2.885305 |
| H | -3.917780 | -4.193819 | -0.091790 |
| H | -2.485633 | 5.085061  | -0.004234 |
| H | -3.010804 | -0.794092 | 4.676964  |
| H | -2.641778 | -2.164305 | 3.612998  |
| H | -4.103296 | -2.202075 | 4.625159  |
| H | -4.978302 | 0.757329  | 4.124597  |
| H | -6.068696 | -0.634508 | 4.074373  |
| H | -5.964062 | 0.458555  | 2.674160  |
| H | -0.742532 | -2.443976 | -4.787691 |
| H | -2.177821 | -2.411883 | -3.744710 |
| H | -1.864240 | -3.828826 | -4.771076 |
| H | 1.216379  | -4.006803 | -4.213610 |
| H | 0.110228  | -5.386424 | -4.212084 |
| H | 1.117947  | -5.057606 | -2.781638 |
| H | -6.215859 | 1.958323  | -1.889247 |
| H | -5.064737 | 1.402693  | -0.652366 |
| H | -5.575356 | 0.295741  | -1.939185 |
| H | -5.409660 | 2.312988  | -4.309182 |
| H | -4.762416 | 0.668220  | -4.344927 |
| H | -3.698419 | 2.045674  | -4.718806 |
| H | 2.384254  | 5.267271  | 1.830901  |
| H | 1.876820  | 4.075208  | 0.612816  |
| H | 3.017119  | 3.601773  | 1.884907  |
| H | 1.581319  | 5.022323  | 4.263280  |
| H | 2.201364  | 3.367386  | 4.310940  |
| H | 0.494886  | 3.684189  | 4.706196  |
| H | 7.594947  | -1.052264 | -0.803875 |
| H | 7.700455  | -0.383798 | 0.828376  |
| H | 7.831660  | 1.953765  | -0.137475 |
| H | 7.741171  | 1.275034  | -1.775160 |
| H | 9.151474  | 0.934632  | -0.749194 |

|   |           |           |           |
|---|-----------|-----------|-----------|
| C | -3.349306 | 3.009790  | -3.899945 |
| H | -3.959876 | 2.126691  | -4.120656 |
| H | -3.972073 | 3.893928  | -4.078301 |
| H | -2.500357 | 3.032521  | -4.587452 |
| C | -4.078805 | 2.948486  | -1.472807 |
| H | -4.694681 | 2.061988  | -1.663544 |
| H | -3.743091 | 2.912312  | -0.433007 |
| H | -4.696532 | 3.843865  | -1.610868 |
| C | -4.288651 | 1.624097  | 3.804647  |
| H | -5.092491 | 1.280588  | 4.466011  |
| H | -3.581747 | 2.198740  | 4.413942  |
| H | -4.715231 | 2.284434  | 3.045682  |
| C | -0.907628 | -4.607269 | -3.652598 |
| H | -1.637281 | -5.184137 | -4.232588 |
| H | -0.125031 | -4.274943 | -4.344522 |
| H | -0.457964 | -5.260745 | -2.901267 |
| C | -2.214460 | -2.473876 | -4.058264 |
| H | -1.440841 | -2.101978 | -4.740319 |
| H | -2.965400 | -3.020407 | -4.641229 |
| H | -2.698644 | -1.613663 | -3.588326 |
| C | 4.291330  | 1.619501  | -3.803720 |
| H | 5.095014  | 1.275224  | -4.464874 |
| H | 3.585298  | 2.195099  | -4.413127 |
| H | 4.718398  | 2.279165  | -3.044444 |
| C | 2.984548  | -0.508057 | -4.234783 |
| H | 2.472841  | -1.357449 | -3.774397 |
| H | 2.257467  | 0.040812  | -4.844601 |
| H | 3.777195  | -0.890519 | -4.888724 |
| C | 0.900817  | -4.609623 | 3.651101  |
| H | 1.629644  | -5.187549 | 4.231079  |
| H | 0.118505  | -4.276500 | 4.342963  |
| H | 0.450471  | -5.262345 | 2.899522  |
| C | -2.984182 | -0.505041 | 4.234808  |
| H | -2.256455 | 0.042949  | 4.844647  |
| H | -3.777095 | -0.886893 | 4.888785  |
| H | -2.473373 | -1.354802 | 3.774105  |
| C | 2.210271  | -2.477955 | 4.057478  |
| H | 1.437042  | -2.105317 | 4.739568  |
| H | 2.960530  | -3.025506 | 4.640363  |
| H | 2.695488  | -1.618187 | 3.587794  |

**1-CO<sub>2</sub>Et-H:**  
Structure

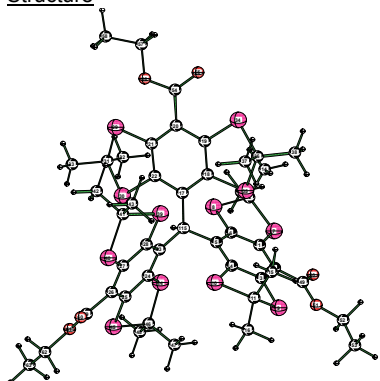

**2-CO<sub>2</sub>Et-H:**  
Structure

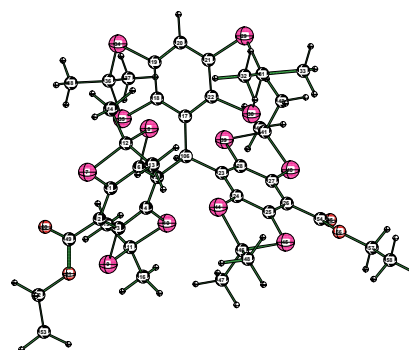

## Coordinates

|   |           |           |           |
|---|-----------|-----------|-----------|
| H | 3.977052  | 3.886942  | 4.079776  |
| H | 2.503729  | 3.027868  | 4.588222  |
| C | -3.439813 | -1.448921 | 0.605441  |
| C | -2.276758 | -0.649099 | 0.586058  |
| C | -1.257068 | -0.868162 | -0.363093 |
| C | -1.447082 | -1.903940 | -1.299807 |
| S | -2.691600 | -3.965361 | -2.549433 |
| S | -0.293603 | -2.208338 | -2.621363 |
| S | -4.621054 | -1.061706 | 1.882412  |
| S | -2.221440 | 0.654847  | 1.797328  |
| C | -3.447932 | -0.105046 | 2.947245  |
| C | -0.885108 | -3.919608 | -2.988166 |
| C | -0.732919 | -4.197318 | -4.487775 |
| C | -0.109445 | -4.941076 | -2.146639 |
| H | 3.961915  | 2.119717  | 4.121786  |
| C | -2.752995 | -1.034071 | 3.950389  |
| C | -4.216843 | 1.011164  | 3.663655  |
| C | 1.352861  | -0.710551 | -0.194810 |
| C | 1.517797  | -1.817352 | 0.659761  |
| C | 2.781952  | -2.425636 | 0.819084  |
| C | 3.912031  | -1.939334 | 0.131316  |
| C | 3.755708  | -0.838890 | -0.734409 |
| C | 2.492604  | -0.243297 | -0.884187 |
| C | -0.097236 | 1.466863  | -0.100007 |
| C | -0.881529 | 2.300126  | -0.931314 |
| C | -1.020203 | 3.678064  | -0.694787 |
| C | -0.354250 | 4.270885  | 0.397433  |
| C | 0.428458  | 3.455873  | 1.239089  |
| C | 0.560116  | 2.070487  | 0.992343  |
| S | 5.067481  | -0.132423 | -1.710537 |
| S | 2.436866  | 1.167772  | -1.972809 |
| C | 3.941521  | 0.688611  | -2.936615 |
| C | 3.578358  | -0.275118 | -4.071746 |
| C | 4.620144  | 1.954726  | -3.468485 |
| S | 2.859328  | -3.834835 | 1.899263  |
| S | 0.197921  | -2.587218 | 1.579367  |
| C | 1.297522  | -3.428118 | 2.807544  |
| C | 1.587916  | -2.509724 | 4.000638  |
| C | 0.630025  | -4.732096 | 3.259018  |
| S | 1.492471  | 1.183802  | 2.219445  |
| S | 1.262698  | 4.091520  | 2.672910  |
| C | 2.424772  | 2.655701  | 2.833789  |
| C | 3.690630  | 2.886407  | 1.999501  |
| C | 2.759753  | 2.450739  | 4.315060  |
| S | -1.701090 | 1.681300  | -2.387126 |
| S | -2.031825 | 4.567747  | -1.858334 |
| C | -2.914865 | 3.072398  | -2.507241 |
| C | -4.161084 | 2.771097  | -1.666273 |
| C | -3.272177 | 3.304165  | -3.979103 |
| C | -4.879840 | -3.249814 | -0.511554 |
| O | -5.061803 | -4.069003 | -1.397692 |
| O | -5.828980 | -2.956637 | 0.396693  |
| C | -7.080365 | -3.672163 | 0.263695  |
| C | -8.003843 | -3.191155 | 1.366403  |
| C | 5.208833  | -2.635530 | 0.331161  |
| O | 5.313518  | -3.790470 | 0.703248  |
| O | 6.273981  | -1.846605 | 0.085909  |
| C | 7.573552  | -2.472772 | 0.213323  |
| C | 8.622150  | -1.409963 | -0.053091 |
| C | -0.458538 | 5.716707  | 0.725096  |
| O | -0.258381 | 6.180029  | 1.833696  |
| O | -0.773759 | 6.480132  | -0.339001 |
| C | -0.936043 | 7.896123  | -0.081682 |
| C | -1.254679 | 8.568431  | -1.403074 |
| H | 0.324747  | -4.168916 | -4.774772 |
| H | -1.281769 | -3.467444 | -5.087877 |
| H | -1.111149 | -5.199192 | -4.721889 |
| H | 0.957417  | -4.909797 | -2.397331 |
| H | -0.486975 | -5.951528 | -2.344478 |

## Coordinates

|   |           |           |           |
|---|-----------|-----------|-----------|
| C | -3.455708 | -0.279446 | 1.133030  |
| C | -3.930313 | -1.230106 | 0.206049  |
| C | -3.107809 | -1.585518 | -0.881815 |
| C | -1.840967 | -0.994204 | -1.019790 |
| C | -1.352143 | -0.037576 | -0.103643 |
| C | -2.180204 | 0.306954  | 0.982923  |
| S | -4.424473 | 0.265856  | 2.518577  |
| S | -1.744581 | 1.495257  | 2.236826  |
| S | -3.564754 | -2.742352 | -2.157180 |
| S | -0.870881 | -1.571272 | -2.398777 |
| C | -2.325986 | -2.127717 | -3.395898 |
| C | -2.982621 | 0.913080  | 3.484169  |
| C | -2.386771 | -0.187528 | 4.369983  |
| C | -3.442968 | 2.112669  | 4.320476  |
| C | -2.905723 | -0.965566 | -4.210041 |
| C | -1.903108 | -3.290930 | -4.298294 |
| C | 0.203734  | 2.054099  | 0.064930  |
| C | -0.599982 | 3.053892  | -0.528260 |
| C | -0.459964 | 4.409704  | -0.188662 |
| C | 0.488727  | 4.805273  | 0.748163  |
| C | 1.298340  | 3.836987  | 1.335887  |
| C | 1.171366  | 2.472977  | 1.003566  |
| C | 1.240827  | -0.304433 | -0.373018 |
| C | 1.402896  | -1.418062 | 0.479354  |
| C | 2.548747  | -2.241314 | 0.393461  |
| C | 3.570551  | -1.955816 | -0.534959 |
| C | 3.422836  | -0.841267 | -1.385594 |
| C | 2.271884  | -0.040145 | -1.301707 |
| S | 2.581691  | 4.277639  | 2.480114  |
| S | 2.331292  | 1.404956  | 1.835844  |
| C | 2.714903  | 2.582873  | 3.222866  |
| C | 1.714320  | 2.413892  | 4.371142  |
| C | 4.152776  | 2.340697  | 3.691059  |
| S | -1.561750 | 5.556077  | -0.976477 |
| S | -1.881395 | 2.713226  | -1.719733 |
| C | -1.941662 | 4.438373  | -2.413030 |
| C | -0.899192 | 4.612029  | -3.522322 |
| C | -3.359002 | 4.722787  | -2.916969 |
| S | 2.167200  | 1.275975  | -2.496622 |
| S | 4.606955  | -0.401250 | -2.633733 |
| C | 3.983346  | 1.334835  | -2.847487 |
| C | 4.682702  | 2.286702  | -1.869407 |
| C | 4.201479  | 1.764306  | -4.302026 |
| S | 0.280246  | -1.837185 | 1.794666  |
| S | 2.606097  | -3.614317 | 1.525789  |
| C | 0.792533  | -3.607019 | 1.901278  |
| C | 0.022975  | -4.463024 | 0.888370  |
| C | 0.578586  | -4.103810 | 3.334853  |
| C | -5.291614 | -1.788219 | 0.409795  |
| O | -6.164611 | -1.239456 | 1.057840  |
| O | -5.463609 | -2.989903 | -0.176947 |
| C | -6.786554 | -3.568076 | -0.067345 |
| C | -6.756509 | -4.915422 | -0.762825 |
| C | 4.794217  | -2.783539 | -0.694279 |
| O | 5.476213  | -2.795814 | -1.704016 |
| O | 5.100416  | -3.504990 | 0.400586  |
| C | 6.258934  | -4.367256 | 0.291708  |
| C | 6.436916  | -5.067046 | 1.625309  |
| H | -1.519176 | 0.195823  | 4.920036  |
| H | -2.060142 | -1.040989 | 3.770297  |
| H | -3.135292 | -0.536301 | 5.091711  |
| H | -2.600834 | 2.525311  | 4.888316  |
| H | -4.204787 | 1.797084  | 5.042956  |
| H | -3.862071 | 2.901297  | 3.690945  |
| H | -2.159997 | -0.595915 | -4.923439 |
| H | -3.200212 | -0.136788 | -3.560481 |
| H | -3.789217 | -1.300615 | -4.766392 |
| H | -2.765206 | -3.657117 | -4.867710 |
| H | -1.489231 | -4.118748 | -3.717195 |

|   |           |           |           |
|---|-----------|-----------|-----------|
| H | -0.215533 | -4.734721 | -1.078291 |
| H | -2.043183 | -0.463252 | 4.560740  |
| H | -2.200923 | -1.823646 | 3.434659  |
| H | -3.494346 | -1.498545 | 4.611903  |
| H | -4.973344 | 0.580533  | 4.330018  |
| H | -4.713048 | 1.675745  | 2.952311  |
| H | -3.531817 | 1.604479  | 4.279942  |
| H | 2.894717  | 0.212392  | -4.776466 |
| H | 3.089189  | -1.173328 | -3.685276 |
| H | 4.483373  | -0.578254 | -4.611526 |
| H | 3.956961  | 2.470667  | -4.172112 |
| H | 5.536166  | 1.691168  | -4.009723 |
| H | 4.876589  | 2.642222  | -2.658638 |
| H | 0.657076  | -2.257430 | 4.521886  |
| H | 2.059432  | -1.578722 | 3.675751  |
| H | 2.260784  | -3.012196 | 4.705937  |
| H | -0.310408 | -4.517117 | 3.779761  |
| H | 1.282270  | -5.263429 | 3.961871  |
| H | 0.419916  | -5.389402 | 2.411702  |
| H | 4.211399  | 3.785445  | 2.350434  |
| H | 3.449018  | 3.016575  | 0.941033  |
| H | 4.368233  | 2.029650  | 2.091662  |
| H | 3.284257  | 3.330389  | 4.705782  |
| H | 3.425522  | 1.588452  | 4.437559  |
| H | 1.858044  | 2.287726  | 4.910767  |
| H | -4.856157 | 3.618186  | -1.710799 |
| H | -3.899026 | 2.591396  | -0.620189 |
| H | -4.669361 | 1.879656  | -2.051301 |
| H | -3.966940 | 4.147433  | -4.067837 |
| H | -3.772638 | 2.419543  | -4.388991 |
| H | -2.383807 | 3.516134  | -4.579026 |
| H | -6.875885 | -4.744984 | 0.333388  |
| H | -7.487729 | -3.476348 | -0.733061 |
| H | -8.186848 | -2.115347 | 1.282719  |
| H | -7.574545 | -3.392697 | 2.352651  |
| H | -8.964733 | -3.712390 | 1.293648  |
| H | 7.632628  | -3.301224 | -0.499774 |
| H | 7.656641  | -2.893810 | 1.219736  |
| H | 9.621968  | -1.847390 | 0.043124  |
| H | 8.535040  | -0.587011 | 0.663257  |
| H | 8.518831  | -1.000923 | -1.062775 |
| H | -0.010660 | 8.274101  | 0.363266  |
| H | -1.736321 | 8.026923  | 0.653602  |
| H | -0.447263 | 8.413109  | -2.125504 |
| H | -1.376497 | 9.645993  | -1.247225 |
| H | -2.181268 | 8.173423  | -1.830691 |
| C | 0.017660  | -0.013318 | -0.528117 |
| H | 0.100098  | 0.081529  | -1.621210 |

|   |           |           |           |
|---|-----------|-----------|-----------|
| H | -1.149070 | -2.954914 | -5.019111 |
| H | 0.601935  | 5.851896  | 1.013067  |
| H | 1.778320  | 1.397220  | 4.776203  |
| H | 0.690202  | 2.581339  | 4.028378  |
| H | 1.937066  | 3.128532  | 5.172492  |
| H | 4.250731  | 1.325570  | 4.092417  |
| H | 4.409467  | 3.040732  | 4.494577  |
| H | 4.867113  | 2.465874  | 2.873802  |
| H | -1.113007 | 3.925140  | -4.349588 |
| H | 0.108049  | 4.401968  | -3.152812 |
| H | -0.922479 | 5.639929  | -3.903004 |
| H | -3.607893 | 4.046427  | -3.742779 |
| H | -3.421917 | 5.748033  | -3.299397 |
| H | -4.099031 | 4.596519  | -2.123183 |
| H | 5.762376  | 2.292505  | -2.061473 |
| H | 4.516075  | 1.982912  | -0.832353 |
| H | 4.298416  | 3.306022  | -1.992575 |
| H | 5.272980  | 1.771110  | -4.533076 |
| H | 3.823990  | 2.781547  | -4.458176 |
| H | 3.697224  | 1.089702  | -4.998324 |
| H | 0.370936  | -5.502105 | 0.933076  |
| H | 0.163574  | -4.093342 | -0.131029 |
| H | -1.049514 | -4.441029 | 1.113701  |
| H | 0.911817  | -5.144097 | 3.426552  |
| H | -0.487522 | -4.076393 | 3.587994  |
| H | 1.128463  | -3.493793 | 4.055920  |
| H | -7.505737 | -2.881410 | -0.525120 |
| H | -7.039174 | -3.654999 | 0.993736  |
| H | -6.023297 | -5.580385 | -0.295591 |
| H | -6.497342 | -4.805013 | -1.820231 |
| H | -7.743105 | -5.386856 | -0.694746 |
| H | 7.124012  | -3.751322 | 0.028057  |
| H | 6.091275  | -5.073579 | -0.527478 |
| H | 6.590932  | -4.341776 | 2.430433  |
| H | 7.311745  | -5.725072 | 1.580938  |
| H | 5.559613  | -5.673662 | 1.869965  |
| C | 0.003719  | 0.614810  | -0.444384 |
| H | -0.109773 | 0.769858  | -1.528407 |

**3-CO<sub>2</sub>Et-H:**  
Structure

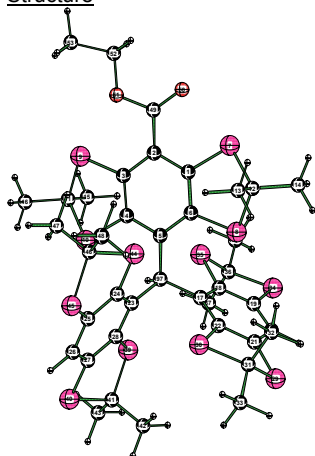

**4-CO<sub>2</sub>Et-H:**  
Structure

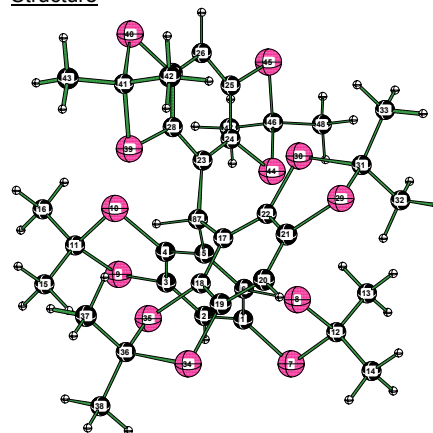

## Coordinates

|   |           |           |           |
|---|-----------|-----------|-----------|
| C | -2.838475 | 1.349533  | 0.944995  |
| C | -3.755665 | 0.697551  | 0.095928  |
| C | -3.261595 | -0.178552 | -0.890890 |
| C | -1.877817 | -0.389424 | -1.005970 |
| C | -0.945069 | 0.251276  | -0.160963 |
| C | -1.449479 | 1.124321  | 0.823123  |
| S | -3.351663 | 2.506703  | 2.191108  |
| S | -0.435978 | 2.041920  | 1.966847  |
| S | -4.278968 | -1.055927 | -2.060883 |
| S | -1.382199 | -1.561521 | -2.254004 |
| C | -2.910195 | -1.361495 | -3.276626 |
| C | -1.790771 | 2.387140  | 3.180473  |
| C | -1.893230 | 1.262991  | 4.218316  |
| C | -1.522223 | 3.739615  | 3.850472  |
| C | -2.770111 | -0.179465 | -4.242626 |
| C | -3.189371 | -2.668754 | -4.024673 |
| C | 1.519621  | 1.118824  | -0.073740 |
| C | 1.438339  | 2.312346  | -0.825703 |
| C | 2.317078  | 3.385429  | -0.603367 |
| C | 3.308129  | 3.291911  | 0.367928  |
| C | 3.414869  | 2.118376  | 1.109888  |
| C | 2.537813  | 1.034804  | 0.900921  |
| C | 1.038601  | -1.444220 | -0.193583 |
| C | 0.527901  | -2.335724 | 0.776629  |
| C | 1.033296  | -3.650180 | 0.874007  |
| C | 2.039999  | -4.104056 | 0.028206  |
| C | 2.553853  | -3.238270 | -0.932412 |
| C | 2.056846  | -1.930474 | -1.047723 |
| S | 4.706544  | 1.897502  | 2.307658  |
| S | 2.864037  | -0.383537 | 1.930545  |
| C | 3.840178  | 0.534493  | 3.219580  |
| C | 2.911946  | 1.107162  | 4.295881  |
| C | 4.877904  | -0.417567 | 3.821645  |
| S | 2.072564  | 4.844022  | -1.584169 |
| S | 0.213621  | 2.600591  | -2.088495 |
| C | 1.153110  | 3.963016  | -2.939244 |
| C | 2.131430  | 3.384520  | -3.966628 |
| C | 0.154415  | 4.926633  | -3.585556 |
| S | 2.758787  | -0.980827 | -2.383702 |
| S | 3.778822  | -3.745429 | -2.110804 |
| C | 4.295216  | -2.015531 | -2.552563 |
| C | 5.381453  | -1.515085 | -1.594371 |
| C | 4.763916  | -1.981822 | -4.009668 |
| S | -0.677666 | -1.929737 | 2.022755  |
| S | 0.385205  | -4.677165 | 2.167820  |
| C | -1.166282 | -3.683447 | 2.389445  |
| C | -2.255437 | -4.156352 | 1.420394  |
| C | -1.627196 | -3.775118 | 3.846684  |
| C | -5.201555 | 0.991361  | 0.267824  |
| O | -5.635866 | 2.005654  | 0.783145  |
| O | -5.998695 | 0.001232  | -0.182000 |
| C | -7.423784 | 0.240079  | -0.086522 |
| C | -8.132457 | -1.002298 | -0.590766 |
| H | -0.957492 | 1.182248  | 4.783961  |
| H | -2.085568 | 0.300018  | 3.738393  |
| H | -2.710942 | 1.471750  | 4.918757  |
| H | -0.590745 | 3.699325  | 4.427217  |
| H | -2.332396 | 3.979819  | 4.548895  |
| H | -1.444771 | 4.542422  | 3.113334  |
| H | -1.946900 | -0.360741 | -4.943501 |
| H | -2.563664 | 0.748647  | -3.702639 |
| H | -3.696815 | -0.049223 | -4.814021 |
| H | -2.375232 | -2.883134 | -4.726377 |
| H | -4.113227 | -2.578112 | -4.607663 |
| H | -3.290319 | -3.510857 | -3.335522 |
| H | 3.992656  | 4.116441  | 0.541122  |
| H | 2.415915  | -5.118808 | 0.114935  |
| H | 2.378156  | 0.293278  | 4.800405  |
| H | 2.171918  | 1.780941  | 3.857063  |

## Coordinates

|   |           |           |           |
|---|-----------|-----------|-----------|
| C | 2.784541  | -2.349063 | 0.966399  |
| C | 3.822094  | -2.089417 | 0.075650  |
| C | 3.615998  | -1.167418 | -0.945372 |
| C | 2.379128  | -0.515868 | -1.072666 |
| C | 1.313354  | -0.762629 | -0.178591 |
| C | 1.538206  | -1.697934 | 0.854446  |
| S | 2.952358  | -3.573460 | 2.239515  |
| S | 0.339651  | -2.194757 | 2.079638  |
| S | 4.880495  | -0.730040 | -2.112216 |
| S | 2.294879  | 0.674240  | -2.396550 |
| C | 3.691870  | -0.063623 | -3.378502 |
| C | 1.566628  | -2.913906 | 3.279348  |
| C | 2.077686  | -1.839890 | 4.245579  |
| C | 0.897602  | -4.070219 | 4.029234  |
| C | 3.182377  | -1.190350 | -4.283093 |
| C | 4.375750  | 1.044346  | -4.183354 |
| C | -1.287003 | -0.772169 | 0.003062  |
| C | -1.632861 | -1.960393 | -0.678534 |
| C | -2.802700 | -2.674184 | -0.369640 |
| C | -3.663043 | -2.216929 | 0.622667  |
| C | -3.345921 | -1.042233 | 1.299761  |
| C | -2.174315 | -0.316427 | 1.002788  |
| C | -0.013622 | 1.485148  | -0.285991 |
| C | 0.803723  | 2.215141  | 0.606380  |
| C | 0.730210  | 3.624371  | 0.649293  |
| C | -0.131714 | 4.331620  | -0.182238 |
| C | -0.935709 | 3.627974  | -1.073646 |
| C | -0.873794 | 2.226886  | -1.130457 |
| S | -4.439937 | -0.356340 | 2.518276  |
| S | -1.977033 | 1.179998  | 1.951851  |
| C | -3.141559 | 0.698653  | 3.319623  |
| C | -2.403897 | -0.084955 | 4.410418  |
| C | -3.789276 | 1.967820  | 3.881311  |
| S | -3.095061 | -4.171544 | -1.276291 |
| S | -0.627938 | -2.693017 | -1.955481 |
| C | -2.004349 | -3.694973 | -2.705398 |
| C | -2.785889 | -2.860717 | -3.725416 |
| C | -1.414133 | -4.957966 | -3.337358 |
| S | -1.900078 | 1.486118  | -2.386742 |
| S | -2.002947 | 4.439871  | -2.234599 |
| C | -3.048717 | 2.938608  | -2.561360 |
| C | -4.186981 | 2.840060  | -1.540114 |
| C | -3.576630 | 2.989562  | -3.997521 |
| S | 1.902796  | 1.510219  | 1.818415  |
| S | 1.722314  | 4.455945  | 1.862833  |
| C | 2.910523  | 3.048042  | 2.080804  |
| C | 4.043492  | 3.132963  | 1.052176  |
| C | 3.448187  | 3.049546  | 3.514556  |
| H | 1.243974  | -1.432866 | 4.829611  |
| H | 2.549693  | -1.015834 | 3.704981  |
| H | 2.812802  | -2.272072 | 4.935110  |
| H | 0.047580  | -3.698196 | 4.612941  |
| H | 1.606888  | -4.523469 | 4.731458  |
| H | 0.540659  | -4.840215 | 3.341275  |
| H | 2.464454  | -0.792831 | -5.009987 |
| H | 2.685875  | -1.969700 | -3.698872 |
| H | 4.019473  | -1.643848 | -4.826709 |
| H | 3.674588  | 1.468729  | -4.910936 |
| H | 5.224575  | 0.633312  | -4.741852 |
| H | 4.737067  | 1.845586  | -3.534147 |
| H | -4.572183 | -2.760547 | 0.860247  |
| H | -0.173040 | 5.415525  | -0.137872 |
| H | -1.613653 | 0.536597  | 4.847640  |
| H | -1.942081 | -0.986824 | 4.001272  |
| H | -3.103385 | -0.377330 | 5.202688  |
| H | -3.022145 | 2.622317  | 4.310604  |
| H | -4.490745 | 1.709052  | 4.682925  |
| H | -4.327361 | 2.519286  | 3.106558  |
| H | -2.126939 | -2.559780 | -4.548279 |

|   |           |           |           |
|---|-----------|-----------|-----------|
| H | 3.495110  | 1.662694  | 5.039985  |
| H | 4.375303  | -1.250335 | 4.326656  |
| H | 5.481399  | 0.108172  | 4.570658  |
| H | 5.542698  | -0.822073 | 3.054586  |
| H | 1.582488  | 2.839283  | -4.743325 |
| H | 2.835330  | 2.694316  | -3.494051 |
| H | 2.701567  | 4.192685  | -4.439758 |
| H | -0.412565 | 4.411502  | -4.369482 |
| H | 0.688380  | 5.759715  | -4.056954 |
| H | -0.546736 | 5.328531  | -2.850277 |
| H | 6.273068  | -2.148056 | -1.676031 |
| H | 5.034419  | -1.532885 | -0.557832 |
| H | 5.657266  | -0.484233 | -1.845184 |
| H | 5.651965  | -2.612500 | -4.131958 |
| H | 5.043600  | -0.960185 | -4.291153 |
| H | 3.984948  | -2.334721 | -4.689763 |
| H | -2.513757 | -5.201960 | 1.626234  |
| H | -1.923247 | -4.078097 | 0.381697  |
| H | -3.154807 | -3.540933 | 1.538056  |
| H | -1.894658 | -4.809453 | 4.091470  |
| H | -2.520907 | -3.158789 | 3.997655  |
| H | -0.847492 | -3.440466 | 4.535254  |
| H | -7.669170 | 1.126472  | -0.680194 |
| H | -7.667668 | 0.461288  | 0.956896  |
| H | -7.860807 | -1.877516 | 0.007793  |
| H | -7.875228 | -1.204948 | -1.634902 |
| H | -9.216637 | -0.860190 | -0.522557 |
| C | 0.544860  | -0.008522 | -0.459282 |
| H | 0.552017  | 0.047891  | -1.558651 |

**1-CO<sub>2</sub>Et-a-oo-radical**  
Structure

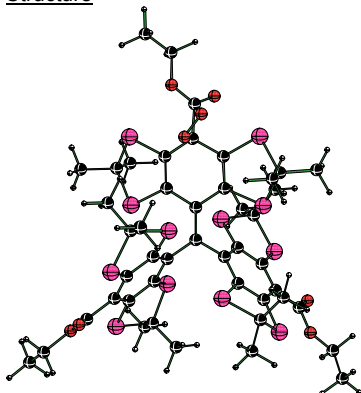

Coordinates

|   |           |           |           |
|---|-----------|-----------|-----------|
| C | -2.374410 | -2.833854 | -1.258588 |
| C | -3.420886 | -2.785590 | -0.308180 |
| C | -3.326141 | -1.869531 | 0.768335  |
| C | -2.244620 | -0.974231 | 0.838817  |
| C | -1.191334 | -1.011929 | -0.103483 |
| C | -1.278690 | -1.955764 | -1.153423 |
| C | -0.058364 | -0.040014 | -0.076076 |
| S | -2.386749 | -3.921627 | -2.660783 |
| S | -0.116810 | -1.992287 | -2.498163 |
| S | -4.516338 | -1.734014 | 2.087960  |
| S | -2.282859 | 0.201688  | 2.169023  |
| C | -3.412381 | -0.789668 | 3.241418  |
| C | -0.608744 | -3.654812 | -3.137955 |
| C | -0.503618 | -3.653780 | -4.668203 |
| C | 0.271014  | -4.750540 | -2.522020 |
| C | -2.611335 | -1.754408 | 4.124854  |
| C | -4.269990 | 0.160067  | 4.084837  |
| C | 1.264915  | -0.460756 | -0.097901 |
| C | 1.713268  | -1.754848 | 0.431195  |
| C | 3.032977  | -2.089033 | 0.519735  |

|   |           |           |           |
|---|-----------|-----------|-----------|
| H | -3.194400 | -1.957503 | -3.264322 |
| H | -3.615918 | -3.448004 | -4.135520 |
| H | -0.744698 | -4.688323 | -4.162275 |
| H | -2.215784 | -5.580019 | -3.751729 |
| H | -0.853648 | -5.546107 | -2.606747 |
| H | -4.846545 | 3.711589  | -1.628716 |
| H | -3.800078 | 2.797765  | -0.518542 |
| H | -4.775244 | 1.932962  | -1.720830 |
| H | -4.233710 | 3.857559  | -4.124601 |
| H | -4.169321 | 2.092994  | -4.212308 |
| H | -2.761440 | 3.055973  | -4.722049 |
| H | 4.613601  | 4.058442  | 1.196268  |
| H | 3.652746  | 3.119957  | 0.031283  |
| H | 4.720775  | 2.278968  | 1.168438  |
| H | 4.038208  | 3.955755  | 3.693498  |
| H | 4.110199  | 2.189661  | 3.668776  |
| H | 2.637913  | 3.006345  | 4.246375  |
| C | -0.016436 | -0.044827 | -0.474187 |
| H | 4.772624  | -2.604574 | 0.173750  |
| H | -0.080292 | -0.153933 | -1.568117 |

**1-CO<sub>2</sub>Et-b-oo-radical**  
Structure

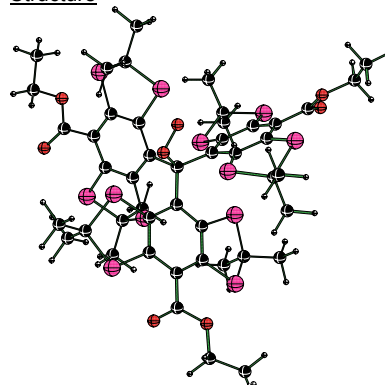

Coordinates

|   |           |           |           |
|---|-----------|-----------|-----------|
| C | -1.322758 | -3.516395 | -1.125422 |
| C | -2.459228 | -3.526261 | -0.291533 |
| C | -2.674091 | -2.431120 | 0.573970  |
| C | -1.833801 | -1.300283 | 0.521854  |
| C | -0.766659 | -1.223534 | -0.410472 |
| C | -0.509385 | -2.362738 | -1.217673 |
| S | -0.859658 | -4.914834 | -2.115489 |
| S | 0.790878  | -2.487201 | -2.440141 |
| S | -3.980902 | -2.384426 | 1.788485  |
| S | -2.227347 | -0.028106 | 1.714127  |
| C | -3.173540 | -1.119431 | 2.862878  |
| C | 0.865303  | -4.326726 | -2.457664 |
| C | 1.274266  | -4.783320 | -3.864042 |
| C | 1.832981  | -4.867249 | -1.397480 |
| C | -2.250644 | -1.785820 | 3.889994  |
| C | -4.255466 | -0.280936 | 3.554185  |
| C | 1.581419  | -0.087977 | -0.185705 |
| C | 2.038231  | -1.123179 | 0.666895  |
| C | 3.418353  | -1.378985 | 0.823924  |
| C | 4.382540  | -0.613001 | 0.143846  |

|   |           |           |           |   |           |           |           |
|---|-----------|-----------|-----------|---|-----------|-----------|-----------|
| C | 4.132357  | -1.123633 | 0.204111  | C | 3.949438  | 0.469820  | -0.639649 |
| C | 3.650000  | 0.024636  | -0.623128 | C | 2.571418  | 0.747172  | -0.773572 |
| C | 2.334774  | 0.373146  | -0.667195 | C | -0.635672 | 1.372631  | -0.229076 |
| C | -0.390155 | 1.414360  | 0.008470  | C | -1.807449 | 1.743206  | -0.949014 |
| C | -1.311969 | 2.043144  | -0.862070 | C | -2.464236 | 2.962472  | -0.697190 |
| C | -1.676725 | 3.392778  | -0.699890 | C | -1.987133 | 3.835492  | 0.297640  |
| C | -1.115317 | 4.158387  | 0.344889  | C | -0.881736 | 3.446046  | 1.074385  |
| C | -0.194603 | 3.547568  | 1.223847  | C | -0.199321 | 2.237497  | 0.806149  |
| C | 0.162961  | 2.196411  | 1.055701  | S | 5.068622  | 1.565334  | -1.485294 |
| S | 4.808247  | 1.026627  | -1.516380 | S | 2.236147  | 2.288852  | -1.600105 |
| S | 1.975667  | 1.822651  | -1.650090 | C | 3.781339  | 2.290917  | -2.601588 |
| C | 3.528224  | 1.732298  | -2.660209 | C | 3.611274  | 1.445238  | -3.868718 |
| C | 3.334469  | 0.815997  | -3.872036 | C | 4.160278  | 3.737941  | -2.931793 |
| C | 3.938725  | 3.146578  | -3.078652 | S | 3.875422  | -2.718158 | 1.900047  |
| S | 3.452695  | -3.629696 | 1.276901  | S | 0.996719  | -2.198134 | 1.646349  |
| S | 0.604194  | -2.939345 | 1.181863  | C | 2.305047  | -2.653966 | 2.870295  |
| C | 1.895664  | -3.710528 | 2.273645  | C | 2.396473  | -1.618642 | 3.997383  |
| C | 2.043303  | -2.923422 | 3.578569  | C | 1.997521  | -4.050923 | 3.420545  |
| C | 1.524975  | -5.173110 | 2.530691  | S | 1.064379  | 1.842420  | 1.999794  |
| S | 1.219282  | 1.519568  | 2.313650  | S | -0.336888 | 4.399758  | 2.470180  |
| S | 0.517513  | 4.384036  | 2.619194  | C | 1.304526  | 3.562246  | 2.633247  |
| C | 1.881295  | 3.149998  | 2.881052  | C | 2.377835  | 4.307163  | 1.831027  |
| C | 3.125796  | 3.534603  | 2.071384  | C | 1.677080  | 3.486791  | 4.119175  |
| C | 2.194273  | 3.069101  | 4.379383  | S | -2.560981 | 0.754064  | -2.230390 |
| S | -1.967557 | 1.233778  | -2.296988 | S | -3.911785 | 3.299581  | -1.678101 |
| S | -2.839708 | 4.020567  | -1.893114 | C | -4.231783 | 1.530330  | -2.113974 |
| C | -3.429598 | 2.352998  | -2.454542 | C | -5.096389 | 0.848374  | -1.047959 |
| C | -4.586417 | 1.864370  | -1.574700 | C | -4.894816 | 1.469901  | -3.495209 |
| C | -3.842311 | 2.439430  | -3.927476 | C | -3.398741 | -4.671805 | -0.420886 |
| C | -4.602511 | -3.649940 | -0.550794 | O | -3.186013 | -5.656955 | -1.106752 |
| O | -4.717407 | -4.388438 | -1.515362 | O | -4.554514 | -4.502722 | 0.249487  |
| O | -5.571535 | -3.526174 | 0.375803  | C | -5.519285 | -5.576466 | 0.136898  |
| C | -6.759337 | -4.327315 | 0.167459  | C | -6.747153 | -5.177051 | 0.932535  |
| C | -7.721724 | -4.025808 | 1.300145  | C | 5.812146  | -1.002796 | 0.290033  |
| C | 5.381358  | -1.815025 | -0.383945 | O | 6.180054  | -2.131886 | 0.557755  |
| O | 5.334867  | -2.884130 | -0.948652 | O | 6.664601  | 0.025161  | 0.124186  |
| O | 6.478976  | -1.072834 | -0.229128 | C | 8.075532  | -0.295761 | 0.209068  |
| C | 7.702026  | -1.617286 | -0.790147 | C | 8.850270  | 0.999313  | 0.060967  |
| C | 8.831514  | -0.682832 | -0.404777 | C | -2.637071 | 5.140452  | 0.602618  |
| C | -1.467898 | 5.580256  | 0.594303  | O | -2.608936 | 5.677163  | 1.694918  |
| O | -1.308414 | 6.141308  | 1.663992  | O | -3.234411 | 5.690272  | -0.470269 |
| O | -1.962352 | 6.206278  | -0.490634 | C | -3.925097 | 6.944003  | -0.244522 |
| C | -2.367676 | 7.583827  | -0.300097 | C | -4.465822 | 7.415732  | -1.580393 |
| C | -2.902296 | 8.093163  | -1.624662 | H | 2.286588  | -4.432120 | -4.096034 |
| H | 0.536647  | -3.497036 | -4.976913 | H | 0.586904  | -4.404140 | -4.624279 |
| H | -1.124688 | -2.871899 | -5.111814 | H | 1.285910  | -5.878334 | -3.915072 |
| H | -0.822342 | -4.624014 | -5.066985 | H | 2.852540  | -4.519156 | -1.601100 |
| H | 1.319122  | -4.602783 | -2.807910 | H | 1.829810  | -5.964072 | -1.409877 |
| H | -0.054036 | -5.735394 | -2.879112 | H | 1.553136  | -4.530516 | -0.396124 |
| H | 0.210264  | -4.738571 | -1.430958 | H | -1.752545 | -1.022888 | 4.499839  |
| H | -1.953191 | -1.190347 | 4.796198  | H | -1.482478 | -2.385160 | 3.395848  |
| H | -1.992180 | -2.420623 | 3.517938  | H | -2.832821 | -2.440201 | 4.549994  |
| H | -3.291504 | -2.365767 | 4.730004  | H | -4.851295 | -0.913244 | 4.222811  |
| H | -4.964888 | -0.413549 | 4.709320  | H | -4.923694 | 0.189366  | 2.828761  |
| H | -4.845167 | 0.843812  | 3.455820  | H | -3.793291 | 0.503005  | 4.164830  |
| H | -3.633295 | 0.749508  | 4.754343  | H | 2.822600  | 1.867115  | -4.501125 |
| H | 2.542056  | 1.213918  | -4.516644 | H | 3.333366  | 0.417158  | -3.622429 |
| H | 3.049626  | -0.193217 | -3.562403 | H | 4.550117  | 1.427136  | -4.434717 |
| H | 4.263009  | 0.752724  | -4.452136 | H | 3.389865  | 4.194071  | -3.563623 |
| H | 3.170407  | 3.583062  | -3.726858 | H | 5.102505  | 3.759912  | -3.491173 |
| H | 4.873767  | 3.114664  | -3.649736 | H | 4.277473  | 4.339378  | -2.026505 |
| H | 4.077433  | 3.797585  | -2.212026 | H | 1.449927  | -1.573801 | 4.548453  |
| H | 1.097084  | -2.935827 | 4.132447  | H | 2.607798  | -0.621097 | 3.602985  |
| H | 2.316103  | -1.882906 | 3.383957  | H | 3.196841  | -1.892893 | 4.694953  |
| H | 2.824180  | -3.373471 | 4.202788  | H | 1.048445  | -4.043449 | 3.968924  |
| H | 0.576990  | -5.230854 | 3.077892  | H | 2.781544  | -4.357134 | 4.122778  |
| H | 2.292917  | -5.651577 | 3.149328  | H | 1.934846  | -4.792900 | 2.620673  |
| H | 1.426016  | -5.733512 | 1.597548  | H | 2.467553  | 5.336836  | 2.197861  |
| H | 3.502683  | 4.509465  | 2.404065  | H | 2.130116  | 4.336506  | 0.767266  |
| H | 2.898510  | 3.596421  | 1.003723  | H | 3.348845  | 3.810178  | 1.940543  |



|   |           |           |           |
|---|-----------|-----------|-----------|
| H | 3.912834  | 2.784243  | 2.209376  |
| H | 2.559729  | 4.038279  | 4.738362  |
| H | 2.983864  | 2.330882  | 4.560800  |
| H | 1.310611  | 2.791507  | 4.959374  |
| H | -5.434745 | 2.554900  | -1.652900 |
| H | -4.287911 | 1.801315  | -0.524674 |
| H | -4.911952 | 0.869319  | -1.899258 |
| H | -4.686379 | 3.129447  | -4.041486 |
| H | -4.169199 | 1.456213  | -4.284668 |
| H | -3.017892 | 2.786092  | -4.555498 |
| H | -6.466806 | -5.381604 | 0.142608  |
| H | -7.179446 | -4.076586 | -0.811497 |
| H | -7.996663 | -2.966502 | 1.309719  |
| H | -7.277715 | -4.275967 | 2.268559  |
| H | -8.634138 | -4.618888 | 1.173624  |
| H | 7.576444  | -1.695265 | -1.874610 |
| H | 7.841267  | -2.625901 | -0.390967 |
| H | 9.776946  | -1.064515 | -0.805524 |
| H | 8.920762  | -0.609384 | 0.683370  |
| H | 8.665481  | 0.321092  | -0.807623 |
| H | -1.499068 | 8.154194  | 0.042930  |
| H | -3.121954 | 7.618050  | 0.492163  |
| H | -2.137014 | 8.033460  | -2.404849 |
| H | -3.207033 | 9.140198  | -1.519127 |
| H | -3.770754 | 7.510659  | -1.946984 |
| O | 4.538252  | -0.475751 | 1.544845  |
| O | 5.310730  | -1.256379 | 2.268085  |

**2-CO<sub>2</sub>Et-a-oo-radical**  
Structure

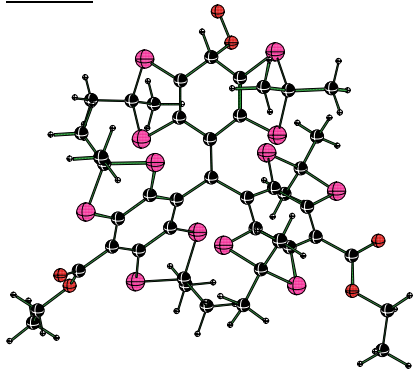

Coordinates

|   |           |           |           |
|---|-----------|-----------|-----------|
| C | 3.452741  | -0.582485 | -1.077172 |
| C | 3.734329  | -1.669471 | -0.226150 |
| C | 2.776375  | -2.049425 | 0.740119  |
| C | 1.557222  | -1.357402 | 0.839180  |
| C | 1.265647  | -0.250093 | 0.004726  |
| C | 2.232535  | 0.111965  | -0.967223 |
| C | -0.030824 | 0.480887  | 0.060686  |
| S | 4.581565  | -0.007580 | -2.321834 |
| S | 2.001038  | 1.444421  | -2.120041 |
| S | 3.002717  | -3.384297 | 1.899555  |
| S | 0.431493  | -1.951403 | 2.079697  |
| C | 1.731327  | -2.777198 | 3.103897  |
| C | 3.293384  | 0.881007  | -3.320126 |
| C | 2.686504  | -0.057725 | -4.369841 |
| C | 3.934061  | 2.110390  | -3.974257 |
| C | 2.353925  | -1.786003 | 4.094139  |
| C | 1.112405  | -3.977961 | 3.826829  |
| C | -0.066285 | 1.868370  | 0.096527  |
| C | 1.014049  | 2.666964  | 0.704334  |
| C | 1.002460  | 4.025604  | 0.705574  |
| C | -1.156458 | 4.015241  | -0.505609 |
| C | -1.184460 | 2.655042  | -0.450291 |
| C | -1.283254 | -0.331565 | 0.076199  |

|   |           |           |           |
|---|-----------|-----------|-----------|
| H | 1.792865  | 4.497671  | 4.526984  |
| H | 2.635314  | 2.969223  | 4.244159  |
| H | 0.913393  | 2.961487  | 4.697667  |
| H | -6.069751 | 1.349015  | -0.978315 |
| H | -4.614899 | 0.880101  | -0.067513 |
| H | -5.260874 | -0.202735 | -1.311964 |
| H | -5.873142 | 1.963503  | -3.463607 |
| H | -5.060918 | 0.426773  | -3.787543 |
| H | -4.279431 | 1.954715  | -4.256991 |
| H | -5.061886 | -6.496090 | 0.514847  |
| H | -5.744045 | -5.729143 | -0.923130 |
| H | -7.177136 | -4.246903 | 0.547992  |
| H | -6.501293 | -5.032896 | 1.989055  |
| H | -7.504538 | -5.965101 | 0.857723  |
| H | 8.315465  | -1.015659 | -0.579773 |
| H | 8.260277  | -0.781938 | 1.171512  |
| H | 9.924152  | 0.794442  | 0.131493  |
| H | 8.581690  | 1.707774  | 0.850828  |
| H | 8.650761  | 1.469105  | -0.906979 |
| H | -3.215605 | 7.654317  | 0.190198  |
| H | -4.720148 | 6.775280  | 0.488794  |
| H | -3.654546 | 7.563925  | -2.299931 |
| H | -4.989298 | 8.369054  | -1.448505 |
| H | -5.169400 | 6.689363  | -1.998346 |
| C | 0.085440  | 0.068283  | -0.614876 |
| O | 0.225480  | 0.038442  | -2.142665 |
| O | 0.123751  | 1.186626  | -2.795544 |

**2-CO<sub>2</sub>Et-b-oo-radical**  
Structure

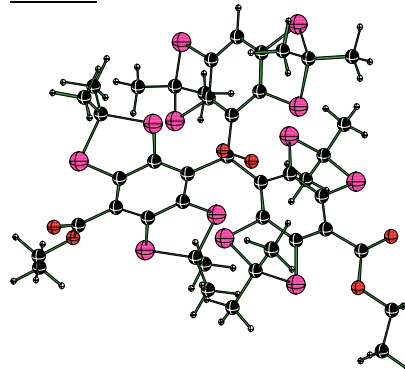

Coordinates

|   |           |           |           |
|---|-----------|-----------|-----------|
| C | -3.480814 | -0.260456 | 0.970420  |
| C | -3.883511 | -1.332718 | 0.152665  |
| C | -2.978009 | -1.840396 | -0.798578 |
| C | -1.714110 | -1.241324 | -0.961520 |
| C | -1.334043 | -0.100725 | -0.209471 |
| C | -2.214091 | 0.341311  | 0.807755  |
| S | -4.527556 | 0.403995  | 2.246009  |
| S | -1.840842 | 1.602731  | 2.020534  |
| S | -3.324663 | -3.244636 | -1.836098 |
| S | -0.628175 | -2.103328 | -2.085439 |
| C | -1.978262 | -2.897857 | -3.061648 |
| C | -3.128579 | 1.081265  | 3.244019  |
| C | -2.574653 | 0.020429  | 4.202664  |
| C | -3.610798 | 2.321722  | 4.004990  |
| C | -2.483565 | -1.970959 | -4.172978 |
| C | -1.464346 | -4.225465 | -3.628688 |
| C | 0.119039  | 2.080331  | -0.046486 |
| C | -0.757164 | 3.096499  | -0.535542 |
| C | -0.535797 | 4.451879  | -0.214106 |
| C | 0.510802  | 4.829798  | 0.614714  |
| C | 1.335214  | 3.848575  | 1.150105  |
| C | 1.159210  | 2.486440  | 0.830890  |
| C | 1.257868  | -0.243722 | -0.448729 |



C -1.553165 -1.328160 -0.889397  
 C -2.683426 -2.160271 -0.796340  
 C -3.585784 -2.008655 0.278553  
 C -3.334635 -1.014646 1.249573  
 C -2.205114 -0.181825 1.142456  
 S -2.491255 4.865360 -1.285410  
 S -2.606134 1.914581 -1.241600  
 C -3.022315 3.393832 -2.286779  
 C -2.249822 3.352974 -3.608608  
 C -4.535335 3.437847 -2.513565  
 S 2.257254 4.891906 1.591320  
 S 2.328243 1.935417 1.672881  
 C 2.683364 3.453526 2.688571  
 C 1.815482 3.476484 3.950508  
 C 4.176349 3.487720 3.027284  
 S -1.943988 0.943803 2.493334  
 S -4.351390 -0.786163 2.686473  
 C -3.692376 0.899917 3.102127  
 C -4.529248 1.988735 2.419491  
 C -3.696620 1.068282 4.625846  
 S -0.576565 -1.512036 -2.357490  
 S -2.870207 -3.349914 -2.107294  
 C -1.107909 -3.252964 -2.683593  
 C -0.232313 -4.244642 -1.908354  
 C -1.062620 -3.521867 -4.191110  
 C 5.045363 -2.351430 -0.384266  
 O 6.024306 -1.831994 -0.889462  
 O 5.039893 -3.622489 0.061978  
 C 6.300794 -4.330933 -0.018777  
 C 6.074714 -5.731914 0.515839  
 C -4.785131 -2.865995 0.463188  
 O -5.352278 -3.017961 1.530870  
 O -5.207573 -3.445136 -0.676483  
 C -6.349412 -4.328687 -0.556639  
 C -6.661962 -4.865290 -1.940062  
 H 1.916584 0.466350 -4.948550  
 H 2.226475 -0.929589 -3.897119  
 H 3.466077 -0.406616 -5.057728  
 H 3.187506 2.664489 -4.554808  
 H 4.725019 1.797460 -4.665976  
 H 4.365138 2.781073 -3.227286  
 H 1.588418 -1.412357 4.784040  
 H 2.791726 -0.930912 3.572066  
 H 3.141750 -2.279987 4.675418  
 H 1.877466 -4.499717 4.413464  
 H 0.667557 -4.684637 3.121875  
 H 0.335922 -3.639869 4.522501  
 H -2.525870 2.454893 -4.173712  
 H -1.170881 3.331891 -3.433856  
 H -2.485400 4.237870 -4.211565  
 H -4.856334 2.553006 -3.074965  
 H -4.801313 4.320118 -3.106930  
 H -5.083179 3.471054 -1.568501  
 H 2.041432 2.603557 4.574264  
 H 0.751816 3.451349 3.698578  
 H 2.014645 4.385105 4.531379  
 H 4.440342 2.622922 3.646858  
 H 4.411733 4.390150 3.603311  
 H 4.792309 3.473461 2.125251  
 H -5.569507 1.931217 2.762150  
 H -4.512786 1.876455 1.332470  
 H -4.133360 2.981213 2.665845  
 H -4.723676 1.015969 5.005418  
 H -3.293986 2.050457 4.899696  
 H -3.102116 0.293990 5.116691  
 H -0.584021 -5.269031 -2.080120  
 H -0.261405 -4.045023 -0.833766  
 H 0.809109 -4.170538 -2.242287  
 H -1.411581 -4.539323 -4.401967  
 H -0.032118 -3.444931 -4.556510

C 1.375495 -1.331739 0.457337  
 C 2.525942 -2.153030 0.467694  
 C 3.587715 -1.906437 -0.420289  
 C 3.508514 -0.799388 -1.285271  
 C 2.368646 0.031221 -1.297946  
 S 2.675828 4.281823 2.227939  
 S 2.328531 1.417693 1.661334  
 C 2.756873 2.610680 3.019247  
 C 1.757625 2.503032 4.175852  
 C 4.188008 2.326819 3.483832  
 S -1.691826 5.654115 -0.813296  
 S -2.275301 2.840518 -1.438927  
 C -2.387607 4.553364 -2.133162  
 C -1.571036 4.670810 -3.424832  
 C -3.863596 4.892480 -2.361315  
 S 2.480728 1.388169 -2.459771  
 S 4.826636 -0.376035 -2.400037  
 C 4.325297 1.397935 -2.552225  
 C 4.944965 2.245335 -1.435209  
 C 4.738946 1.913804 -3.935691  
 S 0.228143 -1.681971 1.777757  
 S 2.568454 -3.453753 1.682534  
 C 0.759529 -3.426037 2.058516  
 C -0.005287 -4.397801 1.152828  
 C 0.555534 -3.767769 3.539603  
 C -5.260497 -1.867121 0.338167  
 O -6.184494 -1.214670 0.788150  
 O -5.382262 -3.159488 -0.018510  
 C -6.711523 -3.726661 0.083680  
 C -6.628037 -5.172045 -0.367504  
 C 4.798369 -2.771541 -0.510279  
 O 5.467486 -2.894097 -1.519043  
 O 5.098007 -3.391790 0.646062  
 C 6.232438 -4.292640 0.609860  
 C 6.403610 -4.870885 2.001238  
 H -1.726003 0.425085 4.766782  
 H -2.231259 -0.862191 3.656703  
 H -3.352518 -0.289708 4.910667  
 H -2.788202 2.755297 4.585664  
 H -4.401878 2.043561 4.711218  
 H -3.998789 3.082798 3.323776  
 H -1.675669 -1.755443 -4.881414  
 H -2.839474 -1.022266 -3.765109  
 H -3.307741 -2.452227 -4.713161  
 H -2.264382 -4.733584 -4.179337  
 H -1.106728 -4.889380 -2.837570  
 H -0.644468 -4.041358 -4.332147  
 H 0.666796 5.874754 0.864273  
 H 1.790701 1.494745 4.604472  
 H 0.737246 2.695209 3.834251  
 H 2.007547 3.228667 4.958999  
 H 4.252464 1.317477 3.905804  
 H 4.474144 3.033936 4.270983  
 H 4.901596 2.409638 2.660421  
 H -1.965816 3.983625 -4.181691  
 H -0.520705 4.421364 -3.252990  
 H -1.626929 5.694927 -3.812447  
 H -4.292194 4.218232 -3.111375  
 H -3.957763 5.915224 -2.743677  
 H -4.441839 4.806269 -1.438237  
 H 6.039382 2.205611 -1.495799  
 H 4.636872 1.889476 -0.448623  
 H 4.626806 3.289983 -1.534198  
 H 5.830632 1.892489 -4.033557  
 H 4.416740 2.953838 -4.063069  
 H 4.302923 1.310434 -4.735858  
 H 0.359691 -5.420103 1.310265  
 H 0.119107 -4.140046 0.098290  
 H -1.076141 -4.367817 1.385546  
 H 0.900354 -4.788930 3.739344

|   |           |           |           |
|---|-----------|-----------|-----------|
| H | -1.686550 | -2.815164 | -4.743829 |
| H | 7.047100  | -3.780597 | 0.562767  |
| H | 6.628677  | -4.333362 | -1.062723 |
| H | 5.314663  | -6.256893 | -0.071284 |
| H | 5.747128  | -5.705170 | 1.559544  |
| H | 7.008833  | -6.301544 | 0.460026  |
| H | -7.183016 | -3.759016 | -0.134849 |
| H | -6.099579 | -5.125812 | 0.150574  |
| H | -6.892687 | -4.050288 | -2.633205 |
| H | -7.530625 | -5.530804 | -1.887768 |
| H | -5.815945 | -5.431490 | -2.341465 |
| C | -0.013834 | 4.832572  | -0.016171 |
| H | -0.339309 | 5.708652  | 0.552186  |
| O | 0.694541  | 5.447021  | -1.211353 |
| O | 0.209752  | 6.636799  | -1.496420 |

### 3-CO<sub>2</sub>Et-a-oo-radical

Structure

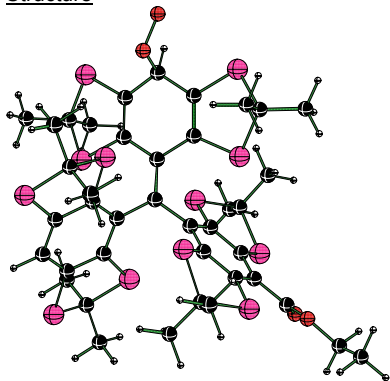

Coordinates

|   |           |           |           |
|---|-----------|-----------|-----------|
| C | -2.358559 | 3.166843  | -1.163169 |
| C | -1.846778 | 4.187865  | -0.368967 |
| C | -0.856285 | 3.890734  | 0.566027  |
| C | -0.376105 | 2.579789  | 0.719303  |
| C | -0.912569 | 1.515178  | -0.051113 |
| C | -1.901752 | 1.844196  | -1.017956 |
| C | -0.430842 | 0.113148  | 0.060878  |
| S | -3.632206 | 3.453484  | -2.365095 |
| S | -2.646215 | 0.672799  | -2.130426 |
| S | -0.109142 | 5.146924  | 1.573893  |
| S | 0.916294  | 2.396360  | 1.926030  |
| C | 0.519095  | 3.956814  | 2.855405  |
| C | -3.247455 | 1.933123  | -3.360556 |
| C | -1.330006 | -0.941985 | 0.136924  |
| C | -2.671051 | -0.785911 | 0.729812  |
| C | -3.591154 | -1.785418 | 0.723213  |
| C | -3.392837 | -3.060149 | -0.010182 |
| C | -1.977991 | -3.270850 | -0.415532 |
| C | -1.026356 | -2.298838 | -0.350103 |
| C | 1.043319  | -0.114723 | 0.090951  |
| C | 1.906638  | 0.378132  | -0.912892 |
| C | 3.302336  | 0.234400  | -0.820038 |
| C | 3.873357  | -0.409288 | 0.299240  |
| C | 3.024840  | -0.902539 | 1.314316  |
| C | 1.628302  | -0.769343 | 1.202376  |
| S | -1.557037 | -4.830719 | -1.125137 |
| S | 0.551634  | -2.766072 | -1.047271 |
| C | -0.116007 | -4.157838 | -2.083442 |
| S | -5.105276 | -1.558972 | 1.598357  |
| S | -3.139650 | 0.649223  | 1.691535  |
| C | -4.431922 | -0.225859 | 2.705320  |
| S | 0.678910  | -1.336382 | 2.593892  |
| S | 3.629726  | -1.645178 | 2.808320  |
| S | 1.296236  | 1.072804  | -2.425546 |
| S | 4.233321  | 0.888514  | -2.188827 |

|   |           |           |           |
|---|-----------|-----------|-----------|
| H | -0.510032 | -3.725280 | 3.793205  |
| H | 1.101378  | -3.079109 | 4.189153  |
| H | -7.390718 | -3.136119 | -0.539018 |
| H | -7.046532 | -3.634488 | 1.121330  |
| H | -5.931944 | -5.738113 | 0.259434  |
| H | -6.290018 | -5.239263 | -1.406080 |
| H | -7.616749 | -5.638106 | -0.293599 |
| H | 7.110824  | -3.727121 | 0.284662  |
| H | 6.038030  | -5.066117 | -0.139737 |
| H | 6.581482  | -4.078541 | 2.735089  |
| H | 7.262082  | -5.551414 | 2.012844  |
| H | 5.514011  | -5.430659 | 2.305754  |
| C | -0.028200 | 0.624330  | -0.569251 |
| O | -0.030651 | 0.888986  | -2.094240 |
| O | -1.153374 | 0.747006  | -2.757796 |

### 3-CO<sub>2</sub>Et-b-oo-radical

Structure

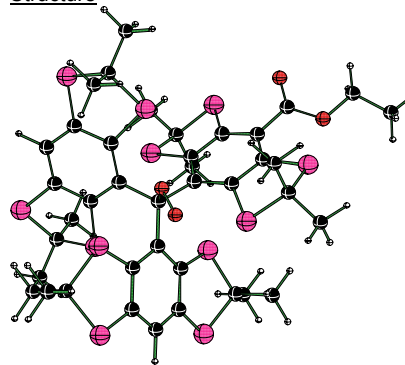

Coordinates

|   |           |           |           |
|---|-----------|-----------|-----------|
| C | -2.847312 | 1.172440  | 1.003553  |
| C | -3.804722 | 0.509715  | 0.214105  |
| C | -3.365829 | -0.459324 | -0.705262 |
| C | -1.987084 | -0.714863 | -0.867567 |
| C | -1.002107 | 0.034727  | -0.166088 |
| C | -1.465224 | 0.936559  | 0.826276  |
| S | -3.311035 | 2.351705  | 2.249360  |
| S | -0.428388 | 1.840523  | 1.969691  |
| S | -4.477734 | -1.440276 | -1.690850 |
| S | -1.640100 | -2.140316 | -1.875903 |
| C | -3.181754 | -2.028582 | -2.875230 |
| C | -1.754608 | 2.149070  | 3.221245  |
| C | -1.866834 | 0.979746  | 4.206694  |
| C | -1.444584 | 3.462473  | 3.948563  |
| C | -3.008483 | -1.041064 | -4.035494 |
| C | -3.555776 | -3.427184 | -3.376206 |
| C | 1.322526  | 1.207138  | -0.209868 |
| C | 1.015172  | 2.456280  | -0.823579 |
| C | 1.824578  | 3.584992  | -0.588104 |
| C | 2.926832  | 3.514688  | 0.254239  |
| C | 3.203765  | 2.319940  | 0.905461  |
| C | 2.412853  | 1.171774  | 0.697683  |
| C | 1.223367  | -1.385612 | -0.337406 |
| C | 0.774372  | -2.363621 | 0.590545  |
| C | 1.480838  | -3.574586 | 0.747345  |
| C | 2.612464  | -3.852644 | -0.008392 |
| C | 3.079499  | -2.900291 | -0.905511 |
| C | 2.412950  | -1.672907 | -1.070147 |
| S | 4.592560  | 2.180519  | 2.002690  |
| S | 2.911578  | -0.220632 | 1.704887  |
| C | 3.876137  | 0.763816  | 2.953480  |
| C | 2.967213  | 1.265737  | 4.080608  |
| C | 5.004831  | -0.117386 | 3.497321  |
| S | 1.334373  | 5.129809  | -1.305110 |
| S | -0.444897 | 2.826710  | -1.789686 |

|   |           |           |           |   |           |           |           |
|---|-----------|-----------|-----------|---|-----------|-----------|-----------|
| C | 2.864727  | 1.967039  | -2.831444 | C | 0.210492  | 4.373576  | -2.570923 |
| C | 2.011267  | -2.417707 | 3.292797  | C | 0.986860  | 4.046802  | -3.851751 |
| H | -2.206687 | 5.205836  | -0.482442 | C | -0.961620 | 5.320708  | -2.845372 |
| C | 1.903364  | -3.839917 | 2.729143  | S | 3.199685  | -0.588723 | -2.251662 |
| H | 2.719361  | -4.460220 | 3.119334  | S | 4.514332  | -3.202724 | -1.902116 |
| H | 0.948797  | -4.292135 | 3.023376  | C | 4.864880  | -1.408825 | -2.216747 |
| H | 1.957136  | -3.838163 | 1.637475  | C | 5.752584  | -0.824229 | -1.113290 |
| C | 1.905025  | -2.415608 | 4.822284  | C | 5.509291  | -1.253412 | -3.598441 |
| H | 0.951107  | -2.855135 | 5.136382  | S | -0.543935 | -2.162699 | 1.779375  |
| H | 2.706811  | -3.025378 | 5.254885  | S | 0.959591  | -4.688726 | 2.024705  |
| H | 1.977430  | -1.403201 | 5.226855  | C | -0.733619 | -3.960870 | 2.202316  |
| C | 2.999636  | 2.085996  | -4.352752 | C | -1.722605 | -4.647144 | 1.254472  |
| H | 2.187329  | 2.701378  | -4.756393 | C | -1.186806 | -4.071132 | 3.661964  |
| H | 3.944526  | 2.578722  | -4.609466 | C | -5.235351 | 0.877793  | 0.400676  |
| H | 2.972671  | 1.105897  | -4.835492 | O | -5.605937 | 1.957743  | 0.822451  |
| C | 2.898555  | 3.340983  | -2.152405 | O | -6.087498 | -0.114515 | 0.082434  |
| H | 2.076967  | 3.965784  | -2.521413 | C | -7.498303 | 0.194793  | 0.200950  |
| H | 2.798143  | 3.249137  | -1.067658 | C | -8.274407 | -1.057944 | -0.156775 |
| H | 3.847697  | 3.844645  | -2.371363 | H | -0.924548 | 0.854283  | 4.752865  |
| C | 1.805455  | 4.506760  | 3.477248  | H | -2.086193 | 0.043366  | 3.686772  |
| H | 1.595643  | 5.441194  | 4.010380  | H | -2.669093 | 1.171761  | 4.929350  |
| H | 2.205737  | 3.792376  | 4.205553  | H | -0.506254 | 3.374231  | 4.508477  |
| H | 2.567933  | 4.698316  | 2.718439  | H | -2.238632 | 3.687462  | 4.670164  |
| C | -4.531135 | 1.411780  | -4.012508 | H | -1.359038 | 4.297238  | 3.248649  |
| H | -4.920167 | 2.151995  | -4.721326 | H | -2.212274 | -1.383455 | -4.705597 |
| H | -4.321987 | 0.494088  | -4.573898 | H | -2.739176 | -0.046154 | -3.671193 |
| H | -5.300478 | 1.197332  | -3.267175 | H | -3.943247 | -0.963195 | -4.603425 |
| C | -2.164761 | 2.232641  | -4.402421 | H | -2.780950 | -3.804026 | -4.053292 |
| H | -1.916652 | 1.320764  | -4.958329 | H | -4.494911 | -3.384689 | -3.939573 |
| H | -2.521329 | 2.990431  | -5.110205 | H | -3.675617 | -4.131512 | -2.549014 |
| H | -1.253467 | 2.603207  | -3.925721 | H | 3.543553  | 4.391054  | 0.428123  |
| C | 0.960044  | -5.235918 | -2.232094 | H | 3.141070  | -4.792237 | 0.119818  |
| H | 0.572314  | -6.074820 | -2.821314 | H | 2.512166  | 0.414694  | 4.600866  |
| H | 1.826819  | -4.829918 | -2.765923 | H | 2.164763  | 1.895093  | 3.688266  |
| H | 1.290380  | -5.611786 | -1.260571 | H | 3.550088  | 1.850302  | 4.802354  |
| C | -0.587949 | -3.633417 | -3.442676 | H | 4.585777  | -0.987041 | 4.016317  |
| H | -1.363463 | -2.872204 | -3.323359 | H | 5.603703  | 0.444374  | 4.223567  |
| H | 0.255063  | -3.185824 | -3.982123 | H | 5.661132  | -0.469188 | 2.697601  |
| H | -0.998486 | -4.454262 | -4.042507 | H | 0.322895  | 3.571576  | -4.583002 |
| C | -5.545130 | 0.765127  | 3.055315  | H | 1.814588  | 3.362699  | -3.647169 |
| H | -6.331321 | 0.262086  | 3.630232  | H | 1.394845  | 4.965317  | -4.290280 |
| H | -5.145789 | 1.572944  | 3.679402  | H | -1.652370 | 4.865349  | -3.564331 |
| H | -5.988331 | 1.202010  | 2.157375  | H | -0.594852 | 6.254830  | -3.286238 |
| C | -0.552883 | 3.689663  | 3.917262  | H | -1.509930 | 5.553180  | -1.929420 |
| H | -0.179677 | 2.965247  | 4.650490  | H | 6.719338  | -1.341762 | -1.096136 |
| H | -0.807728 | 4.620190  | 4.438125  | H | 5.282309  | -0.924018 | -0.132093 |
| H | -1.461538 | 3.282503  | 3.465854  | H | 5.928292  | 0.241891  | -1.298643 |
| C | -3.807975 | -0.846086 | 3.958928  | H | 6.481703  | -1.758919 | -3.617237 |
| H | -3.377656 | -0.059225 | 4.589629  | H | 5.684420  | -0.193222 | -3.814314 |
| H | -4.569962 | -1.382764 | 4.536788  | H | 4.877226  | -1.673107 | -4.384600 |
| H | -3.012100 | -1.548032 | 3.695586  | H | -1.802971 | -5.711636 | 1.505386  |
| H | -3.814513 | -3.923248 | 0.511662  | H | -1.402724 | -4.556182 | 0.213839  |
| O | -4.248154 | -2.974696 | -1.268304 | H | -2.713194 | -4.186590 | 1.346171  |
| O | -4.760062 | -4.144549 | -1.583714 | H | -1.279687 | -5.125530 | 3.946664  |
| C | 5.338430  | -0.576146 | 0.482801  | H | -2.172756 | -3.608639 | 3.786138  |
| O | 5.870359  | -0.758692 | 1.563563  | H | -0.480635 | -3.584335 | 4.338840  |
| O | 6.027569  | -0.535595 | -0.673334 | H | -7.728138 | 1.030494  | -0.467493 |
| C | 7.466700  | -0.659451 | -0.562060 | H | -7.693254 | 0.524837  | 1.225656  |
| H | 7.840154  | 0.165185  | 0.053278  | H | -8.015311 | -1.883090 | 0.514035  |
| H | 7.692331  | -1.593553 | -0.038915 | H | -8.065829 | -1.369914 | -1.184644 |
| C | 8.039865  | -0.634594 | -1.965782 | H | -9.348530 | -0.862759 | -0.065356 |
| H | 9.129323  | -0.739979 | -1.919138 | C | 0.497195  | -0.056713 | -0.589899 |
| H | 7.638905  | -1.457140 | -2.566264 | O | 0.399348  | 0.154879  | -2.117139 |
| H | 7.804828  | 0.307658  | -2.470093 | O | 0.518552  | -0.918381 | -2.880947 |

**4-CO<sub>2</sub>Et-a-oo-radical**  
Structure

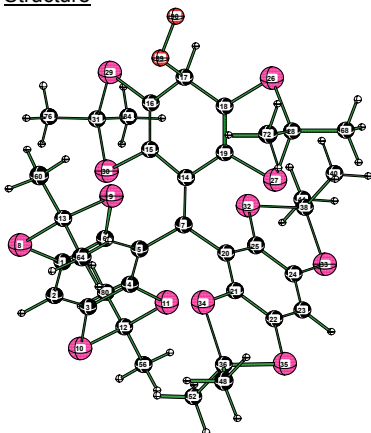

Coordinates

|   |           |           |           |
|---|-----------|-----------|-----------|
| C | -1.101493 | -3.568933 | -0.780413 |
| C | -2.241215 | -3.748673 | -0.003101 |
| C | -2.704959 | -2.691717 | 0.779048  |
| C | -2.034805 | -1.457962 | 0.796490  |
| C | -0.848461 | -1.265046 | 0.042622  |
| C | -0.408814 | -2.344392 | -0.770195 |
| C | -0.113655 | 0.026943  | 0.013062  |
| S | -0.430734 | -4.866896 | -1.786491 |
| S | 1.009507  | -2.278081 | -1.841851 |
| S | -4.185211 | -2.819314 | 1.751418  |
| S | -2.785717 | -0.213891 | 1.820560  |
| C | -3.747594 | -1.405896 | 2.875501  |
| C | 0.515679  | -3.724655 | -2.904899 |
| C | 1.266208  | 0.065792  | 0.158858  |
| C | 2.000911  | -0.942499 | 0.945293  |
| C | 3.355886  | -0.943055 | 1.044459  |
| C | 4.227396  | -0.034014 | 0.259233  |
| C | 3.468879  | 1.069396  | -0.386754 |
| C | 2.108916  | 1.118116  | -0.434425 |
| C | -0.914580 | 1.269818  | -0.174467 |
| C | -1.819795 | 1.437646  | -1.248956 |
| C | -2.628584 | 2.583114  | -1.340819 |
| C | -2.563956 | 3.579719  | -0.369381 |
| C | -1.678829 | 3.435083  | 0.697275  |
| C | -0.853557 | 2.301640  | 0.799159  |
| S | 4.398128  | 2.317385  | -1.220756 |
| S | 1.453236  | 2.470394  | -1.402222 |
| C | 3.012785  | 2.776601  | -2.367369 |
| S | 4.132384  | -2.084967 | 2.143104  |
| S | 1.179322  | -2.122393 | 2.012287  |
| C | 2.611456  | -2.338979 | 3.180637  |
| S | 0.128303  | 2.213588  | 2.280644  |
| S | -1.619041 | 4.600161  | 2.032698  |
| S | -1.927335 | 0.328336  | -2.629197 |
| S | -3.663985 | 2.719419  | -2.774563 |
| C | -3.610105 | 0.902812  | -3.175273 |
| H | -3.200269 | 4.456713  | -0.439292 |
| C | 0.026105  | 4.027688  | 2.682943  |
| H | -2.768829 | -4.697480 | -0.012063 |
| C | 1.168156  | 4.794787  | 2.008197  |
| H | 1.079445  | 5.866363  | 2.223351  |
| H | 2.133414  | 4.438743  | 2.387184  |
| H | 1.154847  | 4.651708  | 0.924980  |
| C | 0.054074  | 4.199632  | 4.204926  |
| H | 1.005140  | 3.831903  | 4.607079  |
| H | -0.024581 | 5.261544  | 4.465120  |
| H | -0.764328 | 3.657679  | 4.684684  |
| C | -3.737632 | 0.712749  | -4.688913 |

**4-CO<sub>2</sub>Et-b-oo-radical**  
Structure

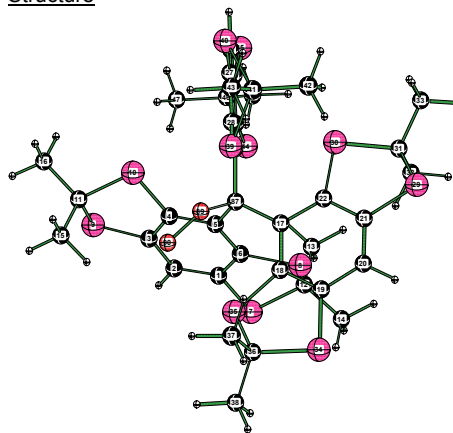

Coordinates

|   |           |           |           |
|---|-----------|-----------|-----------|
| C | 2.311790  | -2.799370 | 0.869331  |
| C | 3.474851  | -2.583928 | 0.140958  |
| C | 3.536414  | -1.504838 | -0.733307 |
| C | 2.429006  | -0.658307 | -0.909815 |
| C | 1.204855  | -0.910300 | -0.233580 |
| C | 1.178635  | -1.974098 | 0.704716  |
| S | 2.190601  | -4.148376 | 2.016382  |
| S | -0.160587 | -2.379892 | 1.824385  |
| S | 5.033283  | -1.095230 | -1.592039 |
| S | 2.776982  | 0.770556  | -1.922302 |
| C | 4.200291  | 0.007159  | -2.834129 |
| C | 0.870949  | -3.345948 | 3.034365  |
| C | 1.482569  | -2.420509 | 4.091354  |
| C | -0.012381 | -4.422611 | 3.672137  |
| C | 3.707701  | -0.807684 | -4.034499 |
| C | 5.165001  | 1.117006  | -3.260750 |
| C | -1.393074 | -0.622858 | -0.140877 |
| C | -1.882131 | -1.816097 | -0.753270 |
| C | -3.193191 | -2.269778 | -0.497572 |
| C | -4.026984 | -1.592719 | 0.380553  |
| C | -3.547302 | -0.462709 | 1.030428  |
| C | -2.250508 | 0.032391  | 0.783173  |
| C | 0.168616  | 1.466606  | -0.299246 |
| C | 1.058820  | 1.977274  | 0.686316  |
| C | 1.207251  | 3.369209  | 0.858863  |
| C | 0.503617  | 4.272328  | 0.073634  |
| C | -0.386312 | 3.793089  | -0.879254 |
| C | -0.569359 | 2.410419  | -1.074886 |
| S | -4.573404 | 0.428400  | 2.170715  |
| S | -1.856163 | 1.480034  | 1.757686  |
| C | -3.147473 | 1.199685  | 3.062987  |
| C | -2.618814 | 0.268350  | 4.159245  |
| C | -3.567651 | 2.557831  | 3.632045  |
| S | -3.715342 | -3.786114 | -1.251735 |
| S | -0.942384 | -2.951412 | -1.761755 |
| C | -2.403361 | -3.760793 | -2.561386 |
| C | -2.869414 | -2.957350 | -3.780593 |
| C | -2.024185 | -5.195685 | -2.938965 |
| S | -1.775023 | 2.033885  | -2.344141 |
| S | -1.317616 | 4.904682  | -1.899643 |
| C | -2.649786 | 3.670848  | -2.273574 |
| C | -3.729562 | 3.686726  | -1.187049 |
| C | -3.239769 | 3.962083  | -3.657144 |
| S | 1.934552  | 1.023042  | 1.916826  |
| S | 2.227073  | 3.945534  | 2.189894  |
| C | 3.137169  | 2.348789  | 2.407597  |
| C | 4.385418  | 2.310288  | 1.519093  |
| C | 3.494501  | 2.159785  | 3.885733  |

|   |           |           |           |
|---|-----------|-----------|-----------|
| H | -3.677453 | -0.352375 | -4.940356 |
| H | -4.712253 | 1.077645  | -5.032597 |
| H | -2.951724 | 1.247116  | -5.228182 |
| C | -4.708367 | 0.153081  | -2.413712 |
| H | -4.647208 | -0.920440 | -2.626766 |
| H | -4.609499 | 0.292964  | -1.333858 |
| H | -5.695033 | 0.517690  | -2.723034 |
| C | -5.029768 | -0.721766 | 3.357007  |
| H | -5.622416 | -1.416830 | 3.962938  |
| H | -4.782748 | 0.139562  | 3.988052  |
| H | -5.639348 | -0.378433 | 2.517660  |
| C | 1.783243  | -4.429932 | -3.395587 |
| H | 1.517108  | -5.307205 | -3.996611 |
| H | 2.366229  | -3.756088 | -4.033715 |
| H | 2.410121  | -4.750521 | -2.560352 |
| C | -0.364492 | -3.263201 | -4.071069 |
| H | 0.190477  | -2.562227 | -4.705557 |
| H | -0.666911 | -4.124267 | -4.679013 |
| H | -1.264893 | -2.759853 | -3.708820 |
| C | 3.100204  | 4.263666  | -2.719865 |
| H | 4.026730  | 4.466084  | -3.269354 |
| H | 2.263148  | 4.545470  | -3.368785 |
| H | 3.077447  | 4.891164  | -1.825474 |
| C | 3.051149  | 1.894405  | -3.619068 |
| H | 3.001818  | 0.834387  | -3.356144 |
| H | 2.198671  | 2.130550  | -4.266860 |
| H | 3.979218  | 2.069419  | -4.176025 |
| C | 2.594696  | -3.767544 | 3.730622  |
| H | 3.447772  | -3.924003 | 4.401006  |
| H | 1.681862  | -3.934466 | 4.314052  |
| H | 2.637302  | -4.506126 | 2.926741  |
| C | -2.891410 | -1.895446 | 4.048149  |
| H | -2.613495 | -1.049333 | 4.687505  |
| H | -3.453042 | -2.621520 | 4.647772  |
| H | -1.973887 | -2.372208 | 3.692872  |
| C | 2.554647  | -1.297807 | 4.302216  |
| H | 1.635341  | -1.427833 | 4.885407  |
| H | 3.415828  | -1.412230 | 4.971500  |
| H | 2.561704  | -0.282549 | 3.896658  |
| H | 5.090183  | 0.324665  | 0.827396  |
| O | 4.871136  | -0.882964 | -0.828559 |
| O | 6.101677  | -0.491070 | -1.079911 |

|   |           |           |           |
|---|-----------|-----------|-----------|
| H | 0.688058  | -1.915141 | 4.652868  |
| H | 2.111386  | -1.655601 | 3.628879  |
| H | 2.095463  | -3.000345 | 4.791677  |
| H | -0.826589 | -3.955806 | 4.238425  |
| H | 0.576086  | -5.023109 | 4.375589  |
| H | -0.444644 | -5.084554 | 2.918134  |
| H | 3.186815  | -0.152764 | -4.742206 |
| H | 3.012465  | -1.590434 | -3.722458 |
| H | 4.558489  | -1.275193 | -4.544327 |
| H | 4.668198  | 1.796166  | -3.962809 |
| H | 6.030880  | 0.685019  | -3.775458 |
| H | 5.518282  | 1.693796  | -2.402400 |
| H | -5.031375 | -1.954700 | 0.577343  |
| H | 0.627585  | 5.340893  | 0.220447  |
| H | -1.747425 | 0.722488  | 4.645272  |
| H | -2.313140 | -0.695284 | 3.743286  |
| H | -3.394420 | 0.094183  | 4.914622  |
| H | -2.713375 | 3.042246  | 4.118328  |
| H | -4.347774 | 2.423058  | 4.390156  |
| H | -3.947859 | 3.219805  | 2.850131  |
| H | -2.069285 | -2.912243 | -4.528020 |
| H | -3.133323 | -1.933788 | -3.501787 |
| H | -3.748572 | -3.433272 | -4.230905 |
| H | -1.224453 | -5.187565 | -3.688178 |
| H | -2.886686 | -5.706776 | -3.381730 |
| H | -1.686741 | -5.763903 | -2.068731 |
| H | -4.212614 | 4.670612  | -1.149107 |
| H | -3.307850 | 3.465369  | -0.203196 |
| H | -4.492064 | 2.930520  | -1.408074 |
| H | -3.734694 | 4.940161  | -3.657492 |
| H | -3.996273 | 3.209666  | -3.908270 |
| H | -2.468694 | 3.956479  | -4.431449 |
| H | 5.072191  | 3.116526  | 1.803783  |
| H | 4.124316  | 2.427853  | 0.464482  |
| H | 4.901040  | 1.350071  | 1.635792  |
| H | 4.188098  | 2.945342  | 4.207004  |
| H | 3.998421  | 1.197165  | 4.030350  |
| H | 2.606285  | 2.193017  | 4.521182  |
| C | -0.015472 | -0.050006 | -0.569098 |
| H | 4.334018  | -3.233820 | 0.275596  |
| O | -0.194950 | -0.028081 | -2.112337 |
| O | 0.486684  | -0.881114 | -2.838452 |

**1-CO<sub>2</sub>Et-a-ooH**  
Structure

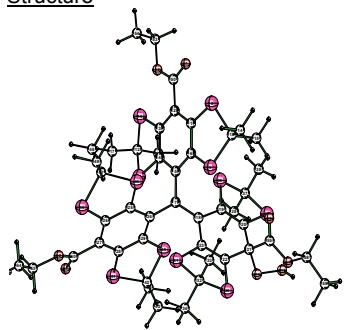

Coordinates

|   |           |           |           |
|---|-----------|-----------|-----------|
| C | 0.695141  | 3.467495  | -1.236705 |
| C | 1.814111  | 3.881571  | -0.478043 |
| C | 2.320783  | 3.013857  | 0.521537  |
| C | 1.758244  | 1.738090  | 0.702434  |
| C | 0.638223  | 1.310304  | -0.049178 |
| C | 0.128442  | 2.195104  | -1.028341 |
| C | 0.043971  | -0.054063 | 0.083976  |
| S | -0.031442 | 4.451576  | -2.523707 |
| S | -1.143549 | 1.714237  | -2.168806 |
| S | 3.678659  | 3.410758  | 1.606307  |

**1-CO<sub>2</sub>Et-b-ooH**  
Structure

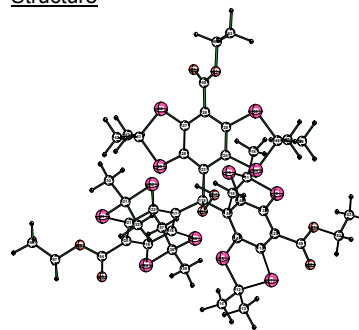

Coordinates

|   |           |           |           |
|---|-----------|-----------|-----------|
| C | -2.239615 | -3.088364 | -1.188262 |
| C | -3.259011 | -2.850372 | -0.243783 |
| C | -3.086987 | -1.802244 | 0.687825  |
| C | -1.982945 | -0.934605 | 0.587331  |
| C | -1.029379 | -1.073482 | -0.454614 |
| C | -1.151762 | -2.191721 | -1.315405 |
| S | -2.267475 | -4.485709 | -2.282499 |
| S | -0.021465 | -2.590181 | -2.642306 |
| S | -4.213448 | -1.491244 | 2.037364  |
| S | -1.897691 | 0.315401  | 1.859894  |

|   |           |           |           |   |           |           |           |
|---|-----------|-----------|-----------|---|-----------|-----------|-----------|
| S | 2.539143  | 0.700547  | 1.914624  | C | -3.007943 | -0.539624 | 3.061507  |
| C | 3.317526  | 2.086540  | 2.853076  | C | -0.479444 | -4.373253 | -2.748925 |
| C | -1.576472 | 3.428945  | -2.697058 | C | -0.316112 | -4.832368 | -4.203566 |
| C | -1.995545 | 3.409154  | -4.171633 | C | 0.372125  | -5.228205 | -1.800994 |
| C | -2.692415 | 3.994694  | -1.809390 | C | -2.220686 | -1.476659 | 3.985482  |
| C | 2.362339  | 2.615142  | 3.930899  | C | -3.763516 | 0.521280  | 3.871795  |
| C | 4.637149  | 1.603617  | 3.464696  | C | 1.541915  | -0.494382 | -0.242361 |
| C | -1.321930 | -0.229643 | 0.260058  | C | 1.810049  | -1.613642 | 0.573900  |
| C | -2.176446 | 0.761002  | 0.930215  | C | 3.141356  | -2.061611 | 0.770717  |
| C | -3.515043 | 0.593906  | 1.108459  | C | 4.226550  | -1.412237 | 0.159409  |
| C | -4.298264 | -0.526321 | 0.465283  | C | 3.973441  | -0.280962 | -0.640953 |
| C | -3.376575 | -1.565739 | -0.126061 | C | 2.658090  | 0.170836  | -0.822705 |
| C | -2.027861 | -1.434936 | -0.201787 | C | -0.303764 | 1.416995  | -0.299343 |
| C | 0.973459  | -1.223000 | 0.047579  | C | -1.448216 | 2.029215  | -0.904852 |
| C | 1.918834  | -1.414820 | -0.986483 | C | -1.788132 | 3.369790  | -0.623910 |
| C | 2.845327  | -2.472725 | -0.952539 | C | -1.024906 | 4.133981  | 0.274378  |
| C | 2.849005  | -3.376304 | 0.132050  | C | 0.016688  | 3.510103  | 0.979073  |
| C | 1.917208  | -3.195799 | 1.177262  | C | 0.379749  | 2.171208  | 0.699045  |
| C | 0.988826  | -2.139288 | 1.130121  | S | 5.256537  | 0.636901  | -1.473153 |
| S | -4.134570 | -2.994437 | -0.850961 | S | 2.556494  | 1.715040  | -1.728971 |
| S | -1.214299 | -2.747553 | -1.106738 | C | 4.114447  | 1.453189  | -2.681114 |
| C | -2.733389 | -3.291571 | -2.029373 | C | 3.875523  | 0.560012  | -3.903718 |
| C | -2.915485 | -2.461206 | -3.302829 | C | 4.694838  | 2.813514  | -3.079592 |
| C | -2.623935 | -4.786917 | -2.336205 | S | 3.366900  | -3.500055 | 1.787660  |
| S | -4.385540 | 1.755351  | 2.113650  | S | 0.589204  | -2.599946 | 1.425831  |
| S | -1.484394 | 2.200899  | 1.744831  | C | 1.757208  | -3.307626 | 2.671406  |
| C | -2.865552 | 2.407112  | 2.958096  | C | 1.905554  | -2.375033 | 3.879824  |
| C | -2.597880 | 1.594410  | 4.229685  | C | 1.248765  | -4.690816 | 3.092478  |
| C | -3.048689 | 3.896051  | 3.267426  | S | 1.573727  | 1.515596  | 1.857692  |
| S | -0.043414 | -1.955128 | 2.566162  | S | 0.849962  | 4.338678  | 2.311264  |
| S | 1.882356  | -4.214748 | 2.630775  | C | 2.244249  | 3.133827  | 2.439509  |
| C | 0.184877  | -3.689383 | 3.172175  | C | 3.437493  | 3.586794  | 1.589789  |
| C | -0.883351 | -4.614450 | 2.576213  | C | 2.642419  | 2.988223  | 3.914294  |
| C | 0.132509  | -3.695301 | 4.704315  | S | -2.600184 | 1.235049  | -2.022782 |
| S | 1.917198  | -0.432442 | -2.462142 | S | -3.260361 | 4.001185  | -1.405473 |
| S | 3.944211  | -2.573856 | -2.349677 | C | -4.030107 | 2.333732  | -1.630062 |
| C | 3.665138  | -0.828372 | -2.917623 | C | -4.788742 | 1.900503  | -0.372515 |
| C | 4.639323  | 0.127576  | -2.218988 | C | -4.953283 | 2.370568  | -2.853513 |
| C | 3.815052  | -0.768551 | -4.441075 | C | -4.485427 | -3.685971 | -0.326238 |
| C | 2.441838  | 5.175959  | -0.841368 | O | -4.624595 | -4.625905 | -1.090065 |
| O | 2.049501  | 5.891381  | -1.748648 | O | -5.475896 | -3.276532 | 0.490814  |
| O | 3.522536  | 5.489273  | -0.100341 | C | -6.705012 | -4.038544 | 0.433595  |
| C | 4.188903  | 6.728225  | -0.439400 | C | -7.685484 | -3.402759 | 1.400530  |
| C | 5.369246  | 6.887494  | 0.499549  | C | 5.589755  | -1.970646 | 0.371287  |
| C | -5.162157 | 0.037820  | -0.713915 | O | 5.811878  | -3.135149 | 0.646919  |
| O | -4.749144 | 0.843149  | -1.512437 | O | 6.562894  | -1.046688 | 0.257123  |
| O | -6.388008 | -0.524747 | -0.778705 | C | 7.920977  | -1.531427 | 0.403928  |
| C | -7.188406 | -0.160220 | -1.937184 | C | 8.850596  | -0.341362 | 0.266944  |
| C | -8.500287 | -0.913584 | -1.842046 | C | -1.323186 | 5.565399  | 0.561632  |
| C | 3.808756  | -4.504124 | 0.248696  | O | -1.099051 | 6.111548  | 1.625749  |
| O | 4.098199  | -5.044721 | 1.301567  | O | -1.833420 | 6.210798  | -0.503431 |
| O | 4.313199  | -4.898133 | -0.936711 | C | -2.195157 | 7.598544  | -0.296107 |
| C | 5.286383  | -5.969372 | -0.890728 | C | -2.699127 | 8.141781  | -1.619292 |
| C | 5.690651  | -6.283610 | -2.318261 | H | 0.734963  | -4.760139 | -4.507342 |
| H | -2.902312 | 2.805958  | -4.296420 | H | -0.920338 | -4.227445 | -4.884271 |
| H | -1.206880 | 2.999079  | -4.807369 | H | -0.616558 | -5.881986 | -4.304805 |
| H | -2.225531 | 4.426313  | -4.510041 | H | 1.430682  | -5.161787 | -2.079616 |
| H | -3.587249 | 3.367021  | -1.884129 | H | 0.061725  | -6.278819 | -1.856979 |
| H | -2.940877 | 5.015431  | -2.125925 | H | 0.271719  | -4.890642 | -0.766058 |
| H | -2.383547 | 4.022263  | -0.761142 | H | -1.490260 | -0.903192 | 4.568757  |
| H | 2.146694  | 1.827117  | 4.661983  | H | -1.683011 | -2.233755 | 3.410288  |
| H | 1.416088  | 2.941869  | 3.491162  | H | -2.904091 | -1.982832 | 4.678034  |
| H | 2.816826  | 3.465628  | 4.453317  | H | -4.449355 | 0.036783  | 4.576642  |
| H | 5.127683  | 2.425238  | 3.999637  | H | -4.338750 | 1.187202  | 3.224193  |
| H | 5.318840  | 1.226795  | 2.698355  | H | -3.058762 | 1.123218  | 4.456708  |

|   |           |           |           |
|---|-----------|-----------|-----------|
| H | 4.446296  | 0.803944  | 4.189412  |
| H | -2.051952 | -2.597070 | -3.964234 |
| H | -3.005082 | -1.396242 | -3.071086 |
| H | -3.819786 | -2.780687 | -3.835203 |
| H | -1.768555 | -4.972823 | -2.995653 |
| H | -3.524374 | -5.131294 | -2.858025 |
| H | -2.498645 | -5.376588 | -1.424624 |
| H | -1.683575 | 1.953399  | 4.716948  |
| H | -2.470635 | 0.533973  | 3.996848  |
| H | -3.435413 | 1.697546  | 4.929999  |
| H | -2.147725 | 4.293569  | 3.748891  |
| H | -3.884006 | 4.037435  | 3.963158  |
| H | -3.244855 | 4.472925  | 2.360392  |
| H | -0.714760 | -5.645209 | 2.911226  |
| H | -0.859969 | -4.594216 | 1.483518  |
| H | -1.881448 | -4.298250 | 2.901356  |
| H | 0.292805  | -4.712446 | 5.080571  |
| H | -0.854595 | -3.367448 | 5.050413  |
| H | 0.893058  | -3.039187 | 5.134520  |
| H | 5.672440  | -0.140523 | -2.470943 |
| H | 4.526183  | 0.085059  | -1.132335 |
| H | 4.454665  | 1.158261  | -2.543065 |
| H | 4.839057  | -1.033294 | -4.729092 |
| H | 3.624566  | 0.250257  | -4.797295 |
| H | 3.122221  | -1.451035 | -4.939511 |
| H | 3.469839  | 7.547616  | -0.342796 |
| H | 4.497651  | 6.680855  | -1.488421 |
| H | 6.070809  | 6.054285  | 0.392180  |
| H | 5.038164  | 6.927537  | 1.541845  |
| H | 5.899343  | 7.818081  | 0.268434  |
| H | -6.622172 | -0.426612 | -2.833982 |
| H | -7.327534 | 0.924738  | -1.933842 |
| H | -9.122593 | -0.676580 | -2.711724 |
| H | -9.056061 | -0.632172 | -0.941203 |
| H | -8.330389 | -1.994481 | -1.823545 |
| H | 4.830181  | -6.829039 | -0.390679 |
| H | 6.135414  | -5.642540 | -0.281948 |
| H | 4.824229  | -6.594801 | -2.910262 |
| H | 6.422573  | -7.098818 | -2.321796 |
| H | 6.142112  | -5.410814 | -2.799708 |
| O | -5.085451 | -1.291678 | 1.397121  |
| O | -6.211299 | -0.512946 | 1.875102  |
| H | -6.852691 | -0.704512 | 1.161631  |

|   |           |           |           |
|---|-----------|-----------|-----------|
| H | 3.183597  | 1.048470  | -4.600025 |
| H | 3.446658  | -0.403160 | -3.615179 |
| H | 4.822932  | 0.377382  | -4.424099 |
| H | 4.015213  | 3.327951  | -3.768601 |
| H | 5.648415  | 2.673980  | -3.601415 |
| H | 4.862854  | 3.450886  | -2.207763 |
| H | 0.943164  | -2.261209 | 4.391860  |
| H | 2.248004  | -1.382117 | 3.575540  |
| H | 2.632198  | -2.791186 | 4.587833  |
| H | 0.275994  | -4.603189 | 3.589914  |
| H | 1.945108  | -5.144555 | 3.807220  |
| H | 1.145072  | -5.357969 | 2.233121  |
| H | 3.801405  | 4.557333  | 1.948739  |
| H | 3.160379  | 3.686133  | 0.537833  |
| H | 4.253606  | 2.857885  | 1.658649  |
| H | 3.011875  | 3.946352  | 4.297865  |
| H | 3.453183  | 2.257553  | 4.017283  |
| H | 1.797330  | 2.667825  | 4.528363  |
| H | -5.611237 | 2.597844  | -0.171489 |
| H | -4.130689 | 1.874527  | 0.499205  |
| H | -5.205462 | 0.896346  | -0.510860 |
| H | -5.785888 | 3.061140  | -2.675532 |
| H | -5.380648 | 1.377019  | -3.030507 |
| H | -4.417838 | 2.686974  | -3.752174 |
| H | -6.482622 | -5.078174 | 0.693556  |
| H | -7.072534 | -4.026100 | -0.597133 |
| H | -7.881573 | -2.360395 | 1.130295  |
| H | -7.299202 | -3.426966 | 2.424115  |
| H | -8.633701 | -3.950964 | 1.375101  |
| H | 8.103593  | -2.290832 | -0.362807 |
| H | 8.008893  | -2.016444 | 1.380663  |
| H | 9.888590  | -0.671197 | 0.384864  |
| H | 8.638838  | 0.411202  | 1.032996  |
| H | 8.746400  | 0.127339  | -0.716361 |
| H | -1.311867 | 8.134948  | 0.063219  |
| H | -2.956586 | 7.645563  | 0.488806  |
| H | -1.925677 | 8.071597  | -2.390579 |
| H | -2.975764 | 9.195396  | -1.502613 |
| H | -3.578837 | 7.588486  | -1.961583 |
| C | 0.111418  | -0.033558 | -0.706063 |
| O | 0.421773  | -0.134673 | -2.155965 |
| O | -0.161237 | 0.828583  | -3.035933 |
| H | 0.573344  | 1.482280  | -3.054614 |

### 2-CO<sub>2</sub>Et-a-ooH

#### Structure

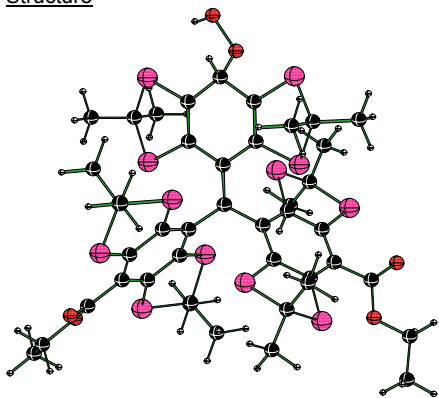

#### Coordinates

|   |          |           |           |
|---|----------|-----------|-----------|
| C | 3.471520 | -0.466944 | -1.112756 |
| C | 3.819286 | -1.514523 | -0.236984 |
| C | 2.891268 | -1.919733 | 0.748324  |
| C | 1.637439 | -1.292082 | 0.841205  |
| C | 1.281731 | -0.221268 | -0.014104 |
| C | 2.217336 | 0.163873  | -1.006225 |

### 2-CO<sub>2</sub>Et-b-ooH

#### Structure

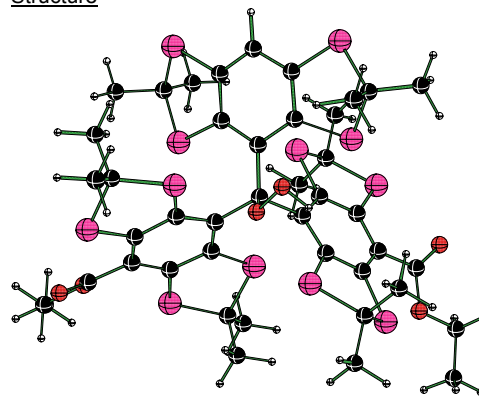

#### Coordinates

|   |           |           |           |
|---|-----------|-----------|-----------|
| C | -3.087426 | -0.301536 | 1.453221  |
| C | -3.853513 | -1.039499 | 0.536721  |
| C | -3.387977 | -1.181850 | -0.783901 |
| C | -2.177840 | -0.583394 | -1.184736 |
| C | -1.351894 | 0.095791  | -0.250381 |
| C | -1.834641 | 0.230299  | 1.077613  |

|   |           |           |           |   |           |           |           |
|---|-----------|-----------|-----------|---|-----------|-----------|-----------|
| C | -0.045286 | 0.453193  | 0.046970  | S | -3.639970 | 0.004422  | 3.111512  |
| S | 4.556340  | 0.137126  | -2.382502 | S | -0.964686 | 1.052157  | 2.401105  |
| S | 1.901031  | 1.452612  | -2.188683 | S | -4.265415 | -2.132390 | -2.009067 |
| S | 3.201541  | -3.203664 | 1.945107  | S | -1.770968 | -0.835161 | -2.913170 |
| S | 0.552637  | -1.916046 | 2.103623  | C | -3.472627 | -1.318153 | -3.458443 |
| C | 1.903958  | -2.635839 | 3.141430  | C | -1.961353 | 0.358617  | 3.798890  |
| C | 3.214550  | 0.935589  | -3.386713 | C | -1.315433 | -0.911955 | 4.363908  |
| C | 2.652630  | -0.054425 | -4.414370 | C | -2.091407 | 1.439002  | 4.880963  |
| C | 3.785070  | 2.183799  | -4.069715 | C | -4.269024 | -0.078202 | -3.885921 |
| C | 2.472525  | -1.581044 | 4.097744  | C | -3.355328 | -2.327415 | -4.606846 |
| C | 1.360780  | -3.849425 | 3.902642  | C | 0.324799  | 2.023777  | 0.016920  |
| C | -0.143601 | 1.837298  | 0.074569  | C | -0.619448 | 3.081874  | -0.130128 |
| C | 0.905469  | 2.697660  | 0.651108  | C | -0.296027 | 4.391641  | 0.274254  |
| C | 0.808933  | 4.051845  | 0.673822  | C | 0.915881  | 4.671972  | 0.891645  |
| C | -1.374802 | 3.916931  | -0.491472 | C | 1.783840  | 3.625633  | 1.173101  |
| C | -1.307650 | 2.561340  | -0.467884 | C | 1.500959  | 2.305908  | 0.764591  |
| C | -1.261488 | -0.413238 | 0.082400  | C | 1.228844  | -0.390194 | -0.629552 |
| C | -1.491923 | -1.441158 | -0.860973 | C | 1.185895  | -1.662002 | 0.000225  |
| C | -2.588033 | -2.315633 | -0.748537 | C | 2.323035  | -2.502559 | 0.003044  |
| C | -3.496806 | -2.176634 | 0.322609  | C | 3.496441  | -2.136995 | -0.678736 |
| C | -3.283900 | -1.154425 | 1.272981  | C | 3.511615  | -0.939458 | -1.411063 |
| C | -2.187262 | -0.281238 | 1.147879  | C | 2.398789  | -0.072780 | -1.386979 |
| S | -2.755412 | 4.672103  | -1.304590 | S | 3.298567  | 3.913374  | 2.055502  |
| S | -2.652579 | 1.729163  | -1.314622 | S | 2.681147  | 1.111650  | 1.390448  |
| C | -3.138906 | 3.186908  | -2.353842 | C | 3.377627  | 2.195073  | 2.734236  |
| C | -2.321583 | 3.228121  | -3.648418 | C | 2.553779  | 2.078521  | 4.021248  |
| C | -4.642994 | 3.127209  | -2.632750 | C | 4.837763  | 1.796856  | 2.970097  |
| S | 2.058184  | 4.987221  | 1.493967  | S | -1.522553 | 5.657552  | 0.080742  |
| S | 2.309985  | 2.043283  | 1.551318  | S | -2.337483 | 2.926022  | -0.630743 |
| C | 2.612832  | 3.573934  | 2.563571  | C | -2.553535 | 4.697084  | -1.125403 |
| C | 1.798250  | 3.535958  | 3.860263  | C | -2.071878 | 4.942271  | -2.559806 |
| C | 4.113525  | 3.696543  | 2.842283  | C | -4.026989 | 5.077507  | -0.950966 |
| S | -1.968080 | 0.878473  | 2.477385  | S | 2.585006  | 1.371905  | -2.416687 |
| S | -4.309434 | -0.935787 | 2.705292  | S | 4.894519  | -0.468583 | -2.418456 |
| C | -3.713491 | 0.781303  | 3.087104  | C | 4.427949  | 1.316839  | -2.552037 |
| C | -4.589019 | 1.824740  | 2.382074  | C | 5.110349  | 2.147776  | -1.459684 |
| C | -3.725123 | 0.979887  | 4.607057  | C | 4.819150  | 1.823141  | -3.947669 |
| S | -0.510083 | -1.619943 | -2.327052 | S | -0.212462 | -2.360262 | 0.870400  |
| S | -2.727074 | -3.541188 | -2.032409 | S | 2.177772  | -4.049791 | 0.878801  |
| C | -0.968537 | -3.389017 | -2.607163 | C | 0.341364  | -4.116817 | 0.752307  |
| C | -0.056000 | -4.323195 | -1.803531 | C | -0.102190 | -4.737502 | -0.577986 |
| C | -0.906898 | -3.696574 | -4.106697 | C | -0.222741 | -4.892763 | 1.947194  |
| C | 5.163393  | -2.128520 | -0.391171 | C | -5.149393 | -1.606497 | 1.005157  |
| O | 6.107022  | -1.573404 | -0.925168 | O | -5.836911 | -1.100691 | 1.871870  |
| O | 5.232908  | -3.383586 | 0.094246  | O | -5.468567 | -2.763359 | 0.394413  |
| C | 6.529370  | -4.024411 | 0.019582  | C | -6.742095 | -3.348297 | 0.765010  |
| C | 6.384036  | -5.420121 | 0.594713  | C | -6.884745 | -4.654251 | 0.007656  |
| C | -4.663741 | -3.073682 | 0.523166  | C | 4.715034  | -2.994720 | -0.702553 |
| O | -5.226596 | -3.226769 | 1.592991  | O | 5.498700  | -3.040419 | -1.631519 |
| O | -5.064282 | -3.688430 | -0.606166 | O | 4.883960  | -3.693842 | 0.436635  |
| C | -6.173551 | -4.609893 | -0.470258 | C | 6.020500  | -4.591526 | 0.468734  |
| C | -6.466749 | -5.181605 | -1.843891 | C | 6.039383  | -5.257194 | 1.831180  |
| H | 1.852432  | 0.416858  | -4.997466 | H | -0.315455 | -0.685166 | 4.752955  |
| H | 2.242466  | -0.940206 | -3.922085 | H | -1.211412 | -1.680522 | 3.595234  |
| H | 3.445688  | -0.374451 | -5.100956 | H | -1.927092 | -1.311329 | 5.182065  |
| H | 3.007505  | 2.683490  | -4.659169 | H | -1.105240 | 1.686805  | 5.290659  |
| H | 4.589733  | 1.899819  | -4.758136 | H | -2.707746 | 1.067957  | 5.708317  |
| H | 4.181139  | 2.892857  | -3.339018 | H | -2.546264 | 2.349451  | 4.483780  |
| H | 1.691621  | -1.238665 | 4.786554  | H | -3.779842 | 0.412499  | -4.736299 |
| H | 2.848610  | -0.713831 | 3.548146  | H | -4.346316 | 0.642113  | -3.066138 |
| H | 3.296117  | -2.008164 | 4.682401  | H | -5.283392 | -0.365026 | -4.187542 |
| H | 2.157911  | -4.306812 | 4.500341  | H | -4.352621 | -2.639697 | -4.937973 |
| H | 0.957012  | -4.602009 | 3.220872  | H | -2.791863 | -3.213462 | -4.304601 |
| H | 0.567875  | -3.537962 | 4.592174  | H | -2.851675 | -1.867475 | -5.464814 |
| H | -2.516638 | 2.325233  | -4.238558 | H | 1.154823  | 5.683686  | 1.204422  |
| H | -1.249884 | 3.273906  | -3.436740 | H | 2.566787  | 1.042992  | 4.381286  |
| H | -2.598590 | 4.105579  | -4.245433 | H | 1.514599  | 2.371745  | 3.852190  |
| H | -4.879307 | 2.230185  | -3.216159 | H | 2.975424  | 2.727111  | 4.798371  |
| H | -4.953272 | 3.996792  | -3.223538 | H | 4.893164  | 0.760012  | 3.320944  |
| H | -5.222820 | 3.105360  | -1.706727 | H | 5.279282  | 2.432810  | 3.746158  |



|   |           |           |           |
|---|-----------|-----------|-----------|
| H | 2.102911  | 2.675960  | 4.468502  |
| H | 0.728757  | 3.445209  | 3.651584  |
| H | 1.963501  | 4.452625  | 4.439174  |
| H | 4.455801  | 2.845689  | 3.442641  |
| H | 4.316799  | 4.608185  | 3.416139  |
| H | 4.691384  | 3.726070  | 1.915619  |
| H | -5.627102 | 1.736290  | 2.724779  |
| H | -4.566771 | 1.691002  | 1.297393  |
| H | -4.229959 | 2.835777  | 2.608777  |
| H | -4.749823 | 0.897943  | 4.987818  |
| H | -3.358068 | 1.981127  | 4.861192  |
| H | -3.103207 | 0.237356  | 5.112810  |
| H | -0.364717 | -5.365292 | -1.949425 |
| H | -0.097419 | -4.096932 | -0.734620 |
| H | 0.982855  | -4.214988 | -2.136141 |
| H | -1.213860 | -4.732577 | -4.290930 |
| H | 0.121100  | -3.588042 | -4.471182 |
| H | -1.556595 | -3.030755 | -4.680171 |
| H | 7.250017  | -3.418861 | 0.578248  |
| H | 6.847958  | -4.038385 | -1.027165 |
| H | 5.649881  | -6.001956 | 0.028591  |
| H | 6.061887  | -5.381579 | 1.639752  |
| H | 7.347470  | -5.939494 | 0.547348  |
| H | -7.027263 | -4.063271 | -0.058229 |
| H | -5.895634 | -5.385081 | 0.250736  |
| H | -6.725475 | -4.387503 | -2.551301 |
| H | -7.311740 | -5.875964 | -1.779672 |
| H | -5.601478 | -5.724963 | -2.235660 |
| C | -0.326380 | 4.825245  | 0.080955  |
| H | -0.762050 | 5.494608  | 0.834302  |
| O | 0.263107  | 5.687209  | -0.928645 |
| O | -0.566301 | 6.869976  | -1.049730 |
| H | -1.127570 | 6.615706  | -1.808970 |

**3-CO<sub>2</sub>Et-a-ooH**  
Structure

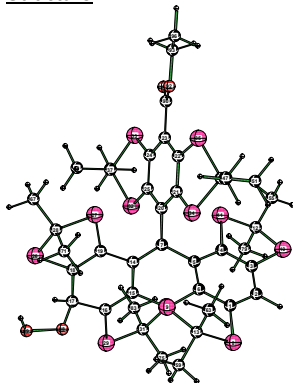

Coordinates

|   |           |           |           |
|---|-----------|-----------|-----------|
| C | 2.191906  | -3.312890 | -1.118033 |
| C | 1.669422  | -4.281621 | -0.267091 |
| C | 0.722282  | -3.909134 | 0.685694  |
| C | 0.299235  | -2.574941 | 0.801240  |
| C | 0.847186  | -1.564500 | -0.029386 |
| C | 1.787275  | -1.969793 | -1.013685 |
| C | 0.424204  | -0.139698 | 0.042583  |
| S | 3.417049  | -3.693707 | -2.343871 |
| S | 2.531125  | -0.870783 | -2.199051 |
| S | -0.039718 | -5.092659 | 1.767886  |
| S | -0.939452 | -2.288502 | 2.043481  |
| C | -0.576827 | -3.828748 | 3.019934  |
| C | 3.058493  | -2.200750 | -3.389332 |
| C | 1.359967  | 0.883993  | 0.081517  |
| C | 2.706893  | 0.707304  | 0.654838  |
| C | 3.628597  | 1.703878  | 0.675648  |

|   |           |           |           |
|---|-----------|-----------|-----------|
| H | 5.433014  | 1.890552  | 2.058637  |
| H | -2.690099 | 4.372820  | -3.264739 |
| H | -1.031493 | 4.633888  | -2.687725 |
| H | -2.155731 | 6.007037  | -2.807276 |
| H | -4.651313 | 4.487187  | -1.631623 |
| H | -4.173853 | 6.134287  | -1.201905 |
| H | -4.365956 | 4.908072  | 0.073868  |
| H | 6.200700  | 2.080664  | -1.561169 |
| H | 4.827563  | 1.799002  | -0.464445 |
| H | 4.815698  | 3.200404  | -1.547057 |
| H | 5.906645  | 1.769542  | -4.077018 |
| H | 4.524742  | 2.872773  | -4.064158 |
| H | 4.342461  | 1.235541  | -4.735990 |
| H | 0.258056  | -5.770706 | -0.649548 |
| H | 0.293167  | -4.174584 | -1.427870 |
| H | -1.196107 | -4.739073 | -0.647838 |
| H | 0.114389  | -5.935193 | 1.910173  |
| H | -1.318170 | -4.898752 | 1.910486  |
| H | 0.096185  | -4.454591 | 2.896407  |
| H | -7.536112 | -2.636564 | 0.518052  |
| H | -6.750862 | -3.494449 | 1.849196  |
| H | -6.070008 | -5.341545 | 0.256432  |
| H | -6.876261 | -4.485415 | -1.073448 |
| H | -7.833248 | -5.132385 | 0.275769  |
| H | 6.926318  | -4.007555 | 0.279830  |
| H | 5.915515  | -5.315916 | -0.345095 |
| H | 6.126950  | -4.512837 | 2.628898  |
| H | 6.896563  | -5.936302 | 1.896874  |
| H | 5.125661  | -5.835789 | 1.997863  |
| C | 0.042196  | 0.651789  | -0.668390 |
| O | 0.098343  | 0.798343  | -2.127066 |
| O | -0.490852 | 1.973258  | -2.705846 |
| H | -1.338673 | 1.589847  | -3.019072 |

**3-CO<sub>2</sub>Et-b-ooH**  
Structure

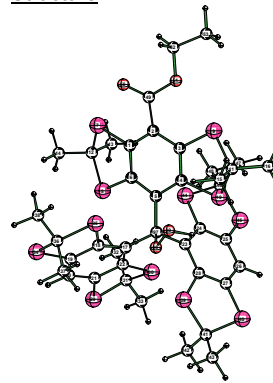

Coordinates

|   |           |           |           |
|---|-----------|-----------|-----------|
| C | -2.900896 | 1.347346  | 0.576566  |
| C | -3.779939 | 0.444352  | -0.045718 |
| C | -3.242267 | -0.695615 | -0.673531 |
| C | -1.847411 | -0.862742 | -0.760237 |
| C | -0.946432 | 0.121290  | -0.271208 |
| C | -1.499923 | 1.173676  | 0.500000  |
| S | -3.487848 | 2.751646  | 1.495997  |
| S | -0.570469 | 2.325183  | 1.506726  |
| S | -4.251455 | -1.993008 | -1.361244 |
| S | -1.361190 | -2.482031 | -1.376352 |
| C | -2.898898 | -2.762254 | -2.361784 |
| C | -1.991477 | 2.848971  | 2.571691  |
| C | -2.133968 | 1.931627  | 3.792205  |
| C | -1.770394 | 4.306550  | 2.992296  |
| C | -2.814251 | -2.112946 | -3.748548 |
| C | -3.147974 | -4.270859 | -2.464836 |

|   |           |           |           |   |           |           |           |
|---|-----------|-----------|-----------|---|-----------|-----------|-----------|
| C | 3.419216  | 3.056909  | 0.073175  | C | 1.436869  | 1.264139  | -0.254838 |
| C | 2.028298  | 3.210309  | -0.468322 | C | 1.184800  | 2.481552  | -0.961587 |
| C | 1.084293  | 2.235165  | -0.440855 | C | 1.945612  | 3.635518  | -0.694576 |
| C | -1.041865 | 0.141797  | 0.083222  | C | 2.986711  | 3.610012  | 0.222864  |
| C | -1.942598 | -0.373400 | -0.876849 | C | 3.273659  | 2.425149  | 0.887127  |
| C | -3.331717 | -0.188179 | -0.759618 | C | 2.518319  | 1.253648  | 0.664742  |
| C | -3.860307 | 0.522058  | 0.339822  | C | 1.170182  | -1.352075 | -0.176867 |
| C | -2.975329 | 1.043059  | 1.308341  | C | 0.746543  | -2.057917 | 0.983749  |
| C | -1.585613 | 0.867342  | 1.171892  | C | 1.296478  | -3.317799 | 1.293754  |
| S | 1.623166  | 4.744221  | -1.258322 | C | 2.249776  | -3.906552 | 0.473364  |
| S | -0.456865 | 2.662222  | -1.253578 | C | 2.700400  | -3.216554 | -0.645972 |
| C | 0.263660  | 4.016878  | -2.295976 | C | 2.192043  | -1.943884 | -0.970403 |
| S | 5.164321  | 1.432499  | 1.498838  | S | 4.648863  | 2.333917  | 2.004948  |
| S | 3.189626  | -0.764365 | 1.557542  | S | 3.101030  | -0.136983 | 1.627933  |
| C | 4.505983  | 0.069482  | 2.573919  | C | 3.992311  | 0.862572  | 2.912368  |
| S | -0.591964 | 1.481689  | 2.511847  | C | 3.032680  | 1.291323  | 4.027805  |
| S | -3.525383 | 1.876013  | 2.776243  | C | 5.154320  | 0.027622  | 3.457630  |
| S | -1.388744 | -1.153622 | -2.369993 | S | 1.472377  | 5.152030  | -1.479604 |
| S | -4.312387 | -0.879556 | -2.074560 | S | -0.139511 | 2.755619  | -2.124260 |
| C | -2.988585 | -2.023769 | -2.695902 | C | 0.508088  | 4.341356  | -2.836319 |
| C | -1.879040 | 2.641847  | 3.167157  | C | 1.414019  | 4.051551  | -4.039406 |
| H | 1.988010  | -5.316188 | -0.349623 | C | -0.678772 | 5.228295  | -3.226631 |
| C | -1.754655 | 4.017277  | 2.500619  | S | 2.934417  | -1.223768 | -2.431693 |
| H | -2.546177 | 4.683166  | 2.865192  | S | 3.905036  | -3.928193 | -1.734514 |
| H | -0.782731 | 4.466204  | 2.737013  | C | 4.454136  | -2.298891 | -2.421505 |
| H | -1.838389 | 3.938159  | 1.413621  | C | 5.548321  | -1.680447 | -1.544436 |
| C | -1.732155 | 2.744399  | 4.689549  | C | 4.929052  | -2.484764 | -3.865882 |
| H | -0.758998 | 3.178059  | 4.947963  | S | -0.337247 | -1.428798 | 2.253758  |
| H | -2.506038 | 3.405036  | 5.097563  | S | 0.824936  | -4.082566 | 2.821527  |
| H | -1.819618 | 1.765614  | 5.167458  | C | -0.700917 | -3.060182 | 3.064558  |
| C | -3.163987 | -2.211797 | -4.206040 | C | -1.916325 | -3.737398 | 2.422017  |
| H | -2.378564 | -2.868241 | -4.598014 | C | -0.920573 | -2.820442 | 4.562196  |
| H | -4.127675 | -2.689849 | -4.416395 | C | -5.236548 | 0.747445  | 0.003791  |
| H | -3.122934 | -1.257146 | -4.736429 | O | -5.688450 | 1.872044  | 0.114449  |
| C | -3.041697 | -3.363144 | -1.951537 | O | -6.013772 | -0.350364 | -0.061108 |
| H | -2.246536 | -4.027020 | -2.310143 | C | -7.443919 | -0.116924 | -0.072447 |
| H | -2.911615 | -3.224598 | -0.874896 | C | -8.129489 | -1.468488 | -0.123187 |
| H | -4.009090 | -3.850128 | -2.123583 | H | -1.225712 | 1.971519  | 4.405236  |
| C | -1.863880 | -4.300632 | 3.701597  | H | -2.296987 | 0.894151  | 3.488038  |
| H | -1.675199 | -5.221913 | 4.264720  | H | -2.984971 | 2.250219  | 4.406292  |
| H | -2.212079 | -3.543033 | 4.412834  | H | -0.873835 | 4.389809  | 3.617517  |
| H | -2.656906 | -4.489126 | 2.973986  | H | -2.621456 | 4.659095  | 3.586790  |
| C | 4.342758  | -1.752214 | -4.092542 | H | -1.653022 | 4.958507  | 2.123304  |
| H | 4.690150  | -2.534769 | -4.777124 | H | -2.019081 | -2.584244 | -4.339855 |
| H | 4.150818  | -0.852888 | -4.688996 | H | -2.607148 | -1.042168 | -3.675786 |
| H | 5.136068  | -1.533031 | -3.374181 | H | -3.762840 | -2.246773 | -4.281484 |
| C | 1.940637  | -2.504311 | -4.392507 | H | -2.339641 | -4.749731 | -3.029216 |
| H | 1.708065  | -1.607335 | -4.978709 | H | -4.083596 | -4.460375 | -3.003401 |
| H | 2.254145  | -3.301209 | -5.077428 | H | -3.212077 | -4.736267 | -1.478091 |
| H | 1.029802  | -2.824813 | -3.880010 | H | 3.569123  | 4.504710  | 0.420387  |
| C | -0.808916 | 5.076549  | -2.559715 | H | 2.657786  | -4.882823 | 0.716547  |
| H | -0.391692 | 5.897024  | -3.154899 | H | 2.617571  | 0.406905  | 4.524894  |
| H | -1.633516 | 4.638502  | -3.133343 | H | 2.201887  | 1.879128  | 3.628138  |
| H | -1.208516 | 5.485116  | -1.628309 | H | 3.564906  | 1.897765  | 4.770363  |
| C | 0.837259  | 3.452282  | -3.599007 | H | 4.770802  | -0.871276 | 3.953673  |
| H | 1.607099  | 2.702395  | -3.397974 | H | 5.714433  | 0.603897  | 4.203124  |
| H | 0.038365  | 2.977619  | -4.180378 | H | 5.838300  | -0.274930 | 2.660814  |
| H | 1.279393  | 4.256576  | -4.199617 | H | 0.843994  | 3.539092  | -4.823071 |
| C | 5.619535  | -0.939120 | 2.868884  | H | 2.253568  | 3.412346  | -3.754002 |
| H | 6.418860  | -0.460145 | 3.446373  | H | 1.812135  | 4.988375  | -4.447489 |
| H | 5.227724  | -1.766765 | 3.471419  | H | -1.276766 | 4.734628  | -4.001239 |
| H | 6.044527  | -1.346347 | 1.948411  | H | -0.319843 | 6.177465  | -3.641455 |
| C | 0.539121  | -3.567822 | 4.037308  | H | -1.320952 | 5.436930  | -2.367870 |
| H | 0.220106  | -2.801585 | 4.753431  | H | 6.430050  | -2.332058 | -1.522175 |
| H | 0.772103  | -4.488274 | 4.585679  | H | 5.197420  | -1.530082 | -0.520005 |
| H | 1.448635  | -3.216573 | 3.542733  | H | 5.842925  | -0.704745 | -1.948727 |
| C | 3.909439  | 0.645652  | 3.861747  | H | 5.819168  | -3.124075 | -3.892548 |
| H | 3.488736  | -0.161814 | 4.472836  | H | 5.206319  | -1.515791 | -4.296826 |
| H | 4.684726  | 1.159317  | 4.442973  | H | 4.152694  | -2.935547 | -4.489146 |
| H | 3.110484  | 1.358622  | 3.640569  | H | -2.099122 | -4.707789 | 2.899244  |

|   |           |           |           |
|---|-----------|-----------|-----------|
| H | 3.637754  | 3.839041  | 0.811762  |
| O | 4.427664  | 3.192872  | -0.964933 |
| O | 4.740591  | 4.601170  | -1.107898 |
| C | -5.315839 | 0.732545  | 0.550330  |
| O | -5.817090 | 0.972845  | 1.634480  |
| O | -6.034079 | 0.661513  | -0.586835 |
| C | -7.466584 | 0.823167  | -0.446380 |
| H | -7.843512 | 0.031462  | 0.208874  |
| H | -7.658549 | 1.781476  | 0.045493  |
| C | -8.074294 | 0.758201  | -1.834245 |
| H | -9.159782 | 0.889761  | -1.766179 |
| H | -7.670261 | 1.548153  | -2.475109 |
| H | -7.871790 | -0.207473 | -2.307394 |
| H | 4.134908  | 4.844814  | -1.836022 |

**4-CO<sub>2</sub>Et-a-ooH**  
Structure

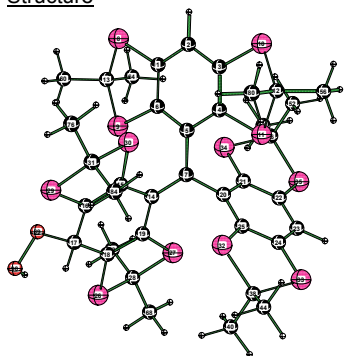

Coordinates

|   |           |           |           |
|---|-----------|-----------|-----------|
| C | -1.500705 | -3.416507 | -0.842376 |
| C | -2.620773 | -3.511357 | -0.022342 |
| C | -2.942579 | -2.443589 | 0.814757  |
| C | -2.150437 | -1.284527 | 0.843158  |
| C | -0.983440 | -1.181920 | 0.044754  |
| C | -0.688128 | -2.268372 | -0.820054 |
| C | -0.125274 | 0.033729  | 0.022422  |
| S | -1.004321 | -4.733213 | -1.923539 |
| S | 0.686369  | -2.301856 | -1.949106 |
| S | -4.384699 | -2.457957 | 1.851189  |
| S | -2.725517 | -0.010327 | 1.941055  |
| C | -3.755741 | -1.139911 | 3.000796  |
| C | -0.001211 | -3.642076 | -3.043622 |
| C | 1.253784  | -0.061321 | 0.134615  |
| C | 1.916472  | -1.155979 | 0.867288  |
| C | 3.266650  | -1.258952 | 0.963814  |
| C | 4.231021  | -0.335709 | 0.290918  |
| C | 3.522749  | 0.788373  | -0.406590 |
| C | 2.173063  | 0.925839  | -0.461713 |
| C | -0.809428 | 1.351411  | -0.124602 |
| C | -1.736826 | 1.621297  | -1.159987 |
| C | -2.438632 | 2.838040  | -1.204290 |
| C | -2.245261 | 3.808230  | -0.223618 |
| C | -1.335374 | 3.565193  | 0.803067  |
| C | -0.614759 | 2.359207  | 0.856542  |
| S | 4.517394  | 1.956476  | -1.296075 |
| S | 1.600533  | 2.293246  | -1.472990 |
| C | 3.158868  | 2.434515  | -2.469665 |
| S | 3.957600  | -2.527017 | 1.977958  |
| S | 1.012953  | -2.331773 | 1.875224  |
| C | 2.430438  | -2.717424 | 3.016456  |
| S | 0.416255  | 2.160438  | 2.293856  |
| S | -1.115910 | 4.697625  | 2.149609  |
| S | -1.999477 | 0.553527  | -2.552346 |
| S | -3.510137 | 3.097603  | -2.594190 |
| C | -3.636422 | 1.294085  | -3.032198 |
| H | -2.800607 | 4.740669  | -0.255730 |

|   |           |           |           |
|---|-----------|-----------|-----------|
| H | -1.762109 | -3.896672 | 1.352112  |
| H | -2.807044 | -3.110977 | 2.549053  |
| H | -1.106950 | -3.773304 | 5.070841  |
| H | -1.801668 | -2.186969 | 4.716685  |
| H | -0.054714 | -2.338806 | 5.022468  |
| H | -7.687471 | 0.504739  | -0.939740 |
| H | -7.707479 | 0.448275  | 0.826546  |
| H | -7.859917 | -2.077010 | 0.745765  |
| H | -7.851001 | -2.016489 | -1.028520 |
| H | -9.216118 | -1.329093 | -0.123171 |
| C | 0.567846  | 0.011918  | -0.615962 |
| O | 0.782455  | 0.120169  | -2.082921 |
| O | -0.260102 | -0.279680 | -2.985213 |
| H | -0.136359 | -1.250774 | -3.014267 |

**4-CO<sub>2</sub>Et-b-ooH**  
Structure

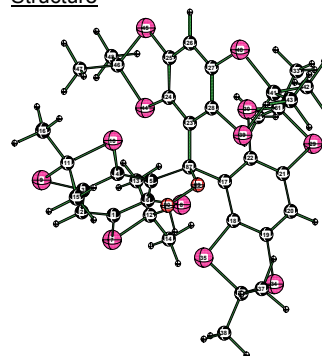

Coordinates

|   |           |           |           |
|---|-----------|-----------|-----------|
| C | -0.472094 | -3.671207 | 0.553942  |
| C | 0.572951  | -4.288456 | -0.121360 |
| C | 1.481433  | -3.502769 | -0.821433 |
| C | 1.317734  | -2.108577 | -0.899849 |
| C | 0.185400  | -1.475049 | -0.316914 |
| C | -0.667799 | -2.274266 | 0.488560  |
| S | -1.625791 | -4.622544 | 1.511565  |
| S | -1.974909 | -1.694495 | 1.573111  |
| S | 2.928699  | -4.208763 | -1.565081 |
| S | 2.707994  | -1.271859 | -1.646754 |
| C | 3.293095  | -2.729994 | -2.631030 |
| C | -2.058601 | -3.220566 | 2.635793  |
| C | -1.069612 | -3.129246 | 3.802702  |
| C | -3.498901 | -3.384628 | 3.130614  |
| C | 2.551077  | -2.834217 | -3.967003 |
| C | 4.805752  | -2.609918 | -2.836373 |
| C | -1.441126 | 0.591073  | -0.152306 |
| C | -2.611569 | 0.124215  | -0.820278 |
| C | -3.873880 | 0.683987  | -0.563003 |
| C | -4.022642 | 1.705502  | 0.366702  |
| C | -2.902917 | 2.160515  | 1.047712  |
| C | -1.616352 | 1.627189  | 0.800160  |
| C | 1.164567  | 0.905705  | -0.205257 |
| C | 2.013808  | 0.607067  | 0.897142  |
| C | 3.123697  | 1.427289  | 1.184704  |
| C | 3.418385  | 2.537929  | 0.405712  |
| C | 2.583968  | 2.860842  | -0.657367 |
| C | 1.462515  | 2.068595  | -0.970291 |
| S | -3.041162 | 3.490428  | 2.212685  |
| S | -0.341609 | 2.408117  | 1.780369  |
| C | -1.474179 | 3.061733  | 3.097370  |
| C | -1.725718 | 1.998949  | 4.172324  |
| C | -0.852633 | 4.328626  | 3.691847  |
| S | -5.280758 | 0.005505  | -1.405655 |
| S | -2.702277 | -1.274171 | -1.940218 |
| C | -4.283174 | -0.766283 | -2.764491 |
| C | -4.021535 | 0.242108  | -3.887999 |

|   |           |           |           |
|---|-----------|-----------|-----------|
| C | 0.498188  | 3.970647  | 2.717777  |
| H | -3.241612 | -4.401841 | -0.039858 |
| C | 1.672621  | 4.641352  | 1.996965  |
| H | 1.680697  | 5.716600  | 2.212174  |
| H | 2.619296  | 4.207397  | 2.339624  |
| H | 1.605612  | 4.500418  | 0.915197  |
| C | 0.610911  | 4.119042  | 4.238092  |
| H | 1.541441  | 3.660714  | 4.592169  |
| H | 0.641204  | 5.180202  | 4.511120  |
| H | -0.231027 | 3.647226  | 4.750132  |
| C | -3.824784 | 1.152743  | -4.544941 |
| H | -3.883024 | 0.093170  | -4.819211 |
| H | -4.764859 | 1.624915  | -4.852417 |
| H | -3.002088 | 1.614956  | -5.095892 |
| C | -4.777983 | 0.631401  | -2.253531 |
| H | -4.837563 | -0.433372 | -2.507321 |
| H | -4.624848 | 0.717484  | -1.174425 |
| H | -5.732110 | 1.107442  | -2.508754 |
| C | -4.937984 | -0.350234 | 3.568316  |
| H | -5.569861 | -1.005880 | 4.178572  |
| H | -4.574334 | 0.455795  | 4.215755  |
| H | -5.547762 | 0.086036  | 2.773493  |
| C | 1.161971  | -4.447136 | -3.629680 |
| H | 0.777917  | -5.271018 | -4.242462 |
| H | 1.771928  | -3.808462 | -4.278828 |
| H | 1.799469  | -4.858338 | -2.843646 |
| C | -0.886354 | -3.044107 | -4.141818 |
| H | -0.289542 | -2.396410 | -4.794828 |
| H | -1.327962 | -3.844144 | -4.747814 |
| H | -1.694525 | -2.447082 | -3.711304 |
| C | 3.345435  | 3.887341  | -2.913293 |
| H | 4.278001  | 3.993711  | -3.479483 |
| H | 2.522701  | 4.185412  | -3.572924 |
| H | 3.373206  | 4.567786  | -2.058542 |
| C | 3.126863  | 1.473866  | -3.661741 |
| H | 2.994316  | 0.440715  | -3.329625 |
| H | 2.291955  | 1.731755  | -4.323468 |
| H | 4.061951  | 1.542310  | -4.230896 |
| C | 2.306900  | -4.167137 | 3.492529  |
| H | 3.147025  | -4.421046 | 4.149386  |
| H | 1.384937  | -4.296204 | 4.071304  |
| H | 2.293307  | -4.864406 | 2.651503  |
| C | -2.901567 | -1.756893 | 4.113229  |
| H | -2.531059 | -0.969636 | 4.780058  |
| H | -3.499501 | -2.464426 | 4.699810  |
| H | -2.040151 | -2.287394 | 3.698857  |
| C | 2.461278  | -1.736493 | 4.192391  |
| H | 1.547090  | -1.838384 | 4.789287  |
| H | 3.326157  | -1.941249 | 4.834791  |
| H | 2.526957  | -0.703428 | 3.840107  |
| H | 4.959220  | 0.048501  | 1.016630  |
| O | 4.990512  | -1.161011 | -0.635871 |
| O | 6.301668  | -0.563165 | -0.800435 |
| H | 6.152629  | -0.025399 | -1.603356 |

### 1-CO<sub>2</sub>Et<sup>+</sup> (cation)

Structure

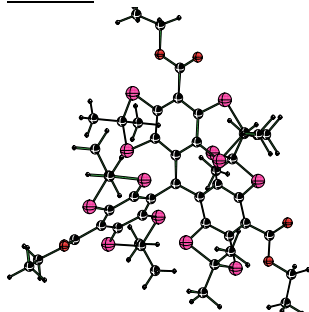

|   |           |           |           |
|---|-----------|-----------|-----------|
| C | -4.997679 | -2.019787 | -3.276675 |
| S | 0.532783  | 2.672547  | -2.373518 |
| S | 2.915690  | 4.268439  | -1.683228 |
| C | 1.169634  | 4.417538  | -2.283732 |
| C | 0.333427  | 5.263597  | -1.317627 |
| C | 1.164116  | 5.008867  | -3.696942 |
| S | 1.738758  | -0.656795 | 2.128707  |
| S | 4.072861  | 1.073987  | 2.640383  |
| C | 3.460942  | -0.664178 | 2.823338  |
| C | 4.358152  | -1.638316 | 2.052705  |
| C | 3.386637  | -1.024471 | 4.310839  |
| H | -1.317204 | -2.271041 | 4.438350  |
| H | -0.045684 | -3.003550 | 3.441817  |
| H | -1.116067 | -4.041662 | 4.409152  |
| H | -3.779498 | -2.534789 | 3.763397  |
| H | -3.585794 | -4.292239 | 3.739300  |
| H | -4.202580 | -3.448740 | 2.297337  |
| H | 2.737616  | -1.938438 | -4.569920 |
| H | 1.473645  | -2.919019 | -3.811327 |
| H | 2.897254  | -3.714954 | -4.520916 |
| H | 5.032841  | -1.721374 | -3.436320 |
| H | 5.182156  | -3.482769 | -3.382143 |
| H | 5.335687  | -2.536339 | -1.883500 |
| H | -4.999292 | 2.137216  | 0.562198  |
| H | 4.277272  | 3.160368  | 0.637443  |
| H | -0.781032 | 1.731955  | 4.659861  |
| H | -2.152621 | 1.091584  | 3.736865  |
| H | -2.418925 | 2.384035  | 4.929655  |
| H | 0.103540  | 4.088901  | 4.170557  |
| H | -1.513088 | 4.745565  | 4.460862  |
| H | -0.680362 | 5.088787  | 2.925889  |
| H | -3.421237 | -0.222122 | -4.679521 |
| H | -3.481978 | 1.116835  | -3.515577 |
| H | -4.971418 | 0.576433  | -4.320957 |
| H | -4.398239 | -2.505164 | -4.055346 |
| H | -5.959147 | -1.744194 | -3.724675 |
| H | -5.176908 | -2.736510 | -2.471745 |
| H | 0.741751  | 6.279289  | -1.250655 |
| H | 0.320724  | 4.825298  | -0.316139 |
| H | -0.701362 | 5.324628  | -1.675535 |
| H | 1.556061  | 6.032557  | -3.680897 |
| H | 0.137995  | 5.054872  | -4.080054 |
| H | 1.767794  | 4.410660  | -4.383959 |
| H | 5.378764  | -1.602971 | 2.452620  |
| H | 4.388446  | -1.389399 | 0.989210  |
| H | 3.976349  | -2.661170 | 2.151910  |
| H | 4.389820  | -1.002429 | 4.752078  |
| H | 2.996159  | -2.041329 | 4.433520  |
| H | 2.745423  | -0.330746 | 4.859801  |
| C | -0.053335 | 0.023211  | -0.608472 |
| H | 0.702779  | -5.364823 | -0.064820 |
| O | -0.230096 | 0.255368  | -2.073401 |
| O | 0.133410  | -0.789781 | -2.991427 |
| H | -0.771882 | -1.129886 | -3.169624 |

### 1-CO<sub>2</sub>Et<sup>-</sup> (anion)

Structure

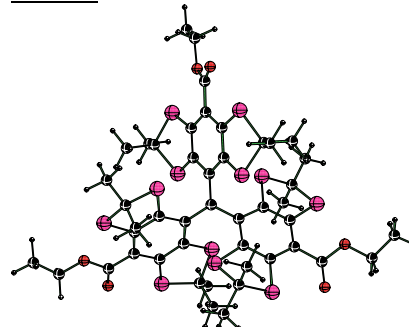

## Coordinates

|   |           |           |           |
|---|-----------|-----------|-----------|
| C | -2.613483 | -2.549845 | -1.245242 |
| C | -3.672007 | -2.268837 | -0.347452 |
| C | -3.535979 | -1.220638 | 0.595493  |
| C | -2.381777 | -0.411008 | 0.598423  |
| C | -1.270607 | -0.732244 | -0.252259 |
| C | -1.434042 | -1.787605 | -1.199412 |
| C | -0.000973 | -0.032349 | -0.122424 |
| S | -2.711662 | -3.783520 | -2.511104 |
| S | -0.310482 | -2.030671 | -2.535374 |
| S | -4.775544 | -0.799063 | 1.799394  |
| S | -2.405988 | 0.948848  | 1.724444  |
| C | -3.657086 | 0.217377  | 2.873220  |
| C | -0.914447 | -3.716747 | -2.999983 |
| C | -0.807311 | -3.882422 | -4.520738 |
| C | -0.123573 | -4.800912 | -2.258459 |
| C | -2.975397 | -0.659407 | 3.929301  |
| C | -4.467123 | 1.349097  | 3.514615  |
| C | 1.245900  | -0.773400 | -0.068876 |
| C | 1.340587  | -2.028367 | 0.619935  |
| C | 2.575074  | -2.699463 | 0.711016  |
| C | 3.718379  | -2.184458 | 0.069116  |
| C | 3.633863  | -0.976225 | -0.655862 |
| C | 2.429624  | -0.254852 | -0.690491 |
| C | 0.006304  | 1.418759  | 0.029644  |
| C | -0.737686 | 2.246495  | -0.868169 |
| C | -0.780442 | 3.641472  | -0.702322 |
| C | -0.103143 | 4.242647  | 0.380625  |
| C | 0.630996  | 3.443517  | 1.284463  |
| C | 0.716833  | 2.050778  | 1.099475  |
| S | 4.996830  | -0.275136 | -1.554948 |
| S | 2.488535  | 1.260400  | -1.606694 |
| C | 3.941671  | 0.780111  | -2.654700 |
| C | 3.485889  | 0.002794  | -3.893319 |
| C | 4.718950  | 2.044614  | -3.033830 |
| S | 2.594020  | -4.219332 | 1.627729  |
| S | 0.002861  | -2.824254 | 1.457577  |
| C | 1.066944  | -3.825558 | 2.601792  |
| C | 1.406557  | -3.026593 | 3.864564  |
| C | 0.336878  | -5.129820 | 2.939267  |
| S | 1.544407  | 1.164885  | 2.381833  |
| S | 1.414392  | 4.101578  | 2.731419  |
| C | 2.494585  | 2.621880  | 3.028230  |
| C | 3.828398  | 2.759152  | 2.285514  |
| C | 2.702420  | 2.452724  | 4.537166  |
| S | -1.454051 | 1.631988  | -2.359309 |
| S | -1.672141 | 4.541309  | -1.945652 |
| C | -2.594565 | 3.072808  | -2.609157 |
| C | -3.909902 | 2.865527  | -1.851529 |
| C | -2.829338 | 3.267474  | -4.110832 |
| C | -4.933495 | -3.053103 | -0.527116 |
| O | -5.056511 | -3.916151 | -1.377846 |
| O | -5.918927 | -2.695680 | 0.301312  |
| C | -7.183238 | -3.407043 | 0.147705  |
| C | -8.154245 | -2.846496 | 1.166354  |
| C | 4.979426  | -2.987383 | 0.156232  |
| O | 4.980716  | -4.190922 | 0.328854  |
| O | 6.083226  | -2.241079 | 0.051224  |
| C | 7.354542  | -2.956894 | 0.092833  |
| C | 8.463305  | -1.927963 | 0.013436  |
| C | -0.154474 | 5.715206  | 0.649022  |
| O | 0.011580  | 6.186750  | 1.757583  |
| O | -0.377406 | 6.442171  | -0.449524 |
| C | -0.470035 | 7.886848  | -0.262590 |
| C | -0.700955 | 8.511728  | -1.622993 |
| H | 0.241899  | -3.844559 | -4.834980 |
| H | -1.365534 | -3.108316 | -5.052453 |
| H | -1.202134 | -4.861175 | -4.814710 |
| H | 0.933330  | -4.768734 | -2.547299 |
| H | -0.522652 | -5.788639 | -2.516399 |

## Coordinates

|   |           |           |           |
|---|-----------|-----------|-----------|
| C | -2.468029 | -2.740838 | -1.187220 |
| C | -3.605858 | -2.491734 | -0.374675 |
| C | -3.505018 | -1.456260 | 0.594681  |
| C | -2.345821 | -0.681175 | 0.695162  |
| C | -1.196908 | -0.897691 | -0.124969 |
| C | -1.313967 | -1.957177 | -1.069844 |
| C | 0.004998  | -0.068322 | -0.027500 |
| S | -2.460336 | -3.977935 | -2.469191 |
| S | -0.073202 | -2.205439 | -2.324107 |
| S | -4.783203 | -1.080555 | 1.790399  |
| S | -2.355618 | 0.593842  | 1.941285  |
| C | -3.664655 | -0.194689 | 2.972459  |
| C | -0.631271 | -3.900021 | -2.790684 |
| C | -0.381952 | -4.122025 | -4.286986 |
| C | 0.095930  | -4.955283 | -1.945997 |
| C | -3.047293 | -1.187611 | 3.965868  |
| C | -4.464550 | 0.892228  | 3.698130  |
| C | 1.326420  | -0.680334 | -0.017277 |
| C | 1.607569  | -1.896858 | 0.674717  |
| C | 2.877167  | -2.481598 | 0.682230  |
| C | 3.964649  | -1.885333 | -0.000914 |
| C | 3.712838  | -0.679726 | -0.701636 |
| C | 2.439913  | -0.102417 | -0.702299 |
| C | -0.125359 | 1.389745  | 0.106247  |
| C | -0.980271 | 2.155964  | -0.740644 |
| C | -1.104127 | 3.546372  | -0.634571 |
| C | -0.372807 | 4.264367  | 0.345957  |
| C | 0.469828  | 3.524476  | 1.212149  |
| C | 0.588220  | 2.134681  | 1.089937  |
| S | 4.939731  | 0.147284  | -1.708096 |
| S | 2.264976  | 1.385203  | -1.674560 |
| C | 3.706132  | 1.028681  | -2.772808 |
| C | 3.283842  | 0.144715  | -3.952848 |
| C | 4.313610  | 2.349540  | -3.255380 |
| S | 3.061742  | -3.967203 | 1.654605  |
| S | 0.367428  | -2.747058 | 1.638007  |
| C | 1.578448  | -3.631091 | 2.716868  |
| C | 1.968156  | -2.761174 | 3.918983  |
| C | 0.974785  | -4.964263 | 3.169662  |
| S | 1.537426  | 1.324267  | 2.360161  |
| S | 1.363377  | 4.279474  | 2.555370  |
| C | 2.491585  | 2.831660  | 2.838112  |
| C | 3.756593  | 2.963109  | 1.979620  |
| C | 2.839450  | 2.759635  | 4.329136  |
| S | -1.813379 | 1.397671  | -2.119903 |
| S | -2.169162 | 4.318894  | -1.842582 |
| C | -3.043502 | 2.758512  | -2.329515 |
| C | -4.265586 | 2.528062  | -1.431094 |
| C | -3.447660 | 2.853310  | -3.804647 |
| C | -4.830149 | -3.250283 | -0.650196 |
| O | -4.944277 | -4.117376 | -1.507699 |
| O | -5.893206 | -2.887429 | 0.117865  |
| C | -7.118471 | -3.593800 | -0.132333 |
| C | -8.170078 | -3.033438 | 0.809096  |
| C | 5.271578  | -2.551551 | 0.042903  |
| O | 5.452190  | -3.734488 | 0.294581  |
| O | 6.314175  | -1.709468 | -0.198257 |
| C | 7.614678  | -2.319290 | -0.245360 |
| C | 8.631094  | -1.213306 | -0.468055 |
| C | -0.454885 | 5.718737  | 0.532678  |
| O | -0.129404 | 6.316549  | 1.549137  |
| O | -0.916424 | 6.382812  | -0.560845 |
| C | -1.076293 | 7.803531  | -0.411045 |
| C | -1.575438 | 8.351053  | -1.736562 |
| H | 0.692383  | -4.074819 | -4.503021 |
| H | -0.895881 | -3.370140 | -4.891236 |
| H | -0.736128 | -5.116144 | -4.586784 |
| H | 1.176914  | -4.906714 | -2.124406 |
| H | -0.261194 | -5.960122 | -2.206723 |

|   |           |           |           |
|---|-----------|-----------|-----------|
| H | -0.190247 | -4.675227 | -1.174662 |
| H | -2.303667 | -0.052999 | 4.547530  |
| H | -2.390812 | -1.458641 | 3.465128  |
| H | -3.731223 | -1.115323 | 4.578747  |
| H | -5.240470 | 0.929302  | 4.167316  |
| H | -4.949428 | 1.978567  | 2.762920  |
| H | -3.816470 | 1.974480  | 4.135898  |
| H | 2.841248  | 0.631834  | -4.517595 |
| H | 2.928067  | -0.896596 | -3.618057 |
| H | 4.357366  | -0.299296 | -4.485094 |
| H | 4.098781  | 2.695833  | -3.659595 |
| H | 5.605551  | 1.775111  | -3.618333 |
| H | 5.039049  | 2.602815  | -2.150631 |
| H | 0.492473  | -2.782216 | 4.417927  |
| H | 1.922586  | -2.093446 | 3.621671  |
| H | 2.057810  | -3.621054 | 4.515076  |
| H | -0.582508 | -4.918321 | 3.496726  |
| H | 0.971464  | -5.754302 | 3.577696  |
| H | 0.083240  | -5.697001 | 2.040328  |
| H | 4.364805  | 3.642424  | 2.650365  |
| H | 3.677544  | 2.866413  | 1.207836  |
| H | 4.453157  | 1.875578  | 2.459636  |
| H | 3.230548  | 3.325068  | 4.937655  |
| H | 3.323255  | 1.572691  | 4.739186  |
| H | 1.752635  | 2.347062  | 5.066808  |
| H | -4.553825 | 3.742594  | -1.982575 |
| H | -3.738861 | 2.719432  | -0.781576 |
| H | -4.435919 | 1.986833  | -2.241704 |
| H | -3.469853 | 4.140740  | -4.276349 |
| H | -3.347759 | 2.396750  | -4.527243 |
| H | -1.891330 | 3.413350  | -4.651705 |
| H | -6.989818 | -4.473171 | 0.295380  |
| H | -7.526355 | -3.265316 | -0.880969 |
| H | -8.320473 | -1.776859 | 1.005889  |
| H | -7.786014 | -2.994698 | 2.185985  |
| H | -9.115665 | -3.361710 | 1.069889  |
| H | 7.373838  | -3.659981 | -0.744788 |
| H | 7.384196  | -3.534620 | 1.020663  |
| H | 9.432282  | -2.436478 | 0.053049  |
| H | 8.409783  | -1.226007 | 0.851239  |
| H | 8.410729  | -1.361253 | -0.921049 |
| H | 0.460436  | 8.225037  | 0.201602  |
| H | -1.288494 | 8.085596  | 0.435073  |
| H | 0.121560  | 8.281268  | -2.306905 |
| H | -0.763726 | 9.599640  | -1.515310 |
| H | -1.635467 | 8.156009  | -2.067201 |

### 2-CO<sub>2</sub>Et<sup>+</sup> (cation)

#### Structure

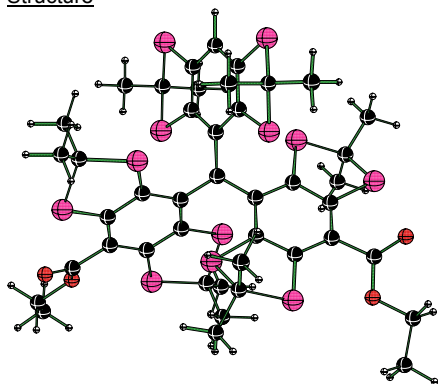

#### Coordinates

|   |          |           |           |
|---|----------|-----------|-----------|
| C | 3.520487 | -0.366875 | -1.056191 |
| C | 3.802304 | -1.430014 | -0.170297 |
| C | 2.815427 | -1.876089 | 0.731110  |

|   |           |           |           |
|---|-----------|-----------|-----------|
| H | -0.077631 | -4.788652 | -0.879763 |
| H | -2.376652 | -0.661487 | 4.655959  |
| H | -2.465036 | -1.948981 | 3.440338  |
| H | -3.834553 | -1.685929 | 4.546227  |
| H | -5.268115 | 0.440785  | 4.293315  |
| H | -4.905736 | 1.599145  | 2.990864  |
| H | -3.812553 | 1.444943  | 4.384835  |
| H | 2.538428  | 0.665056  | -4.566096 |
| H | 2.840097  | -0.789348 | -3.598050 |
| H | 4.152765  | -0.096087 | -4.578772 |
| H | 3.583503  | 2.901474  | -3.859208 |
| H | 5.189953  | 2.157854  | -3.887109 |
| H | 4.617473  | 2.977787  | -2.414079 |
| H | 1.085818  | -2.546689 | 4.534327  |
| H | 2.391116  | -1.809095 | 3.587239  |
| H | 2.713603  | -3.278072 | 4.536813  |
| H | 0.080961  | -4.788559 | 3.780588  |
| H | 1.694677  | -5.516420 | 3.786480  |
| H | 0.696753  | -5.585684 | 2.314558  |
| H | 4.295775  | 3.883387  | 2.239538  |
| H | 3.506779  | 2.993643  | 0.915776  |
| H | 4.419481  | 2.105674  | 2.147040  |
| H | 3.381694  | 3.662697  | 4.635672  |
| H | 3.491745  | 1.899807  | 4.524298  |
| H | 1.940403  | 2.665331  | 4.943561  |
| H | -4.974398 | 3.359860  | -1.535468 |
| H | -3.970593 | 2.450348  | -0.381369 |
| H | -4.770521 | 1.596192  | -1.711365 |
| H | -4.159494 | 3.674969  | -3.952218 |
| H | -3.941569 | 1.926104  | -4.118582 |
| H | -2.578280 | 3.021272  | -4.445462 |
| H | -6.954590 | -4.664928 | 0.029448  |
| H | -7.399007 | -3.463171 | -1.183230 |
| H | -8.315795 | -1.962375 | 0.636050  |
| H | -7.871446 | -3.171900 | 1.852955  |
| H | -9.125962 | -3.545778 | 0.648358  |
| H | 7.634913  | -3.060925 | -1.052086 |
| H | 7.790801  | -2.853954 | 0.693889  |
| H | 9.642020  | -1.636262 | -0.502800 |
| H | 8.589880  | -0.479496 | 0.343414  |
| H | 8.439320  | -0.690546 | -1.410222 |
| H | -0.114299 | 8.240992  | -0.123697 |
| H | -1.781243 | 8.001310  | 0.404190  |
| H | -0.862985 | 8.135188  | -2.539258 |
| H | -1.702147 | 9.437874  | -1.667199 |
| H | -2.537587 | 7.904119  | -2.005185 |

### 2-CO<sub>2</sub>Et<sup>-</sup> (anion)

#### Structure

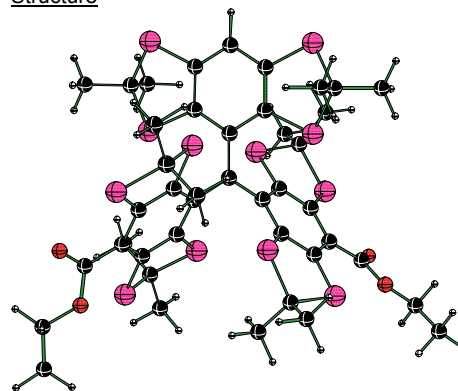

#### Coordinates

|   |           |           |           |
|---|-----------|-----------|-----------|
| C | -3.574275 | -0.164231 | 1.018124  |
| C | -3.935284 | -1.243399 | 0.172277  |
| C | -2.950740 | -1.720244 | -0.731132 |

|   |           |           |           |   |           |           |           |
|---|-----------|-----------|-----------|---|-----------|-----------|-----------|
| C | 1.537170  | -1.282358 | 0.734346  | C | -1.676263 | -1.149863 | -0.771807 |
| C | 1.261527  | -0.144763 | -0.096454 | C | -1.288207 | -0.053912 | 0.063772  |
| C | 2.280241  | 0.289453  | -1.008331 | C | -2.300077 | 0.405624  | 0.964905  |
| C | -0.006981 | 0.555286  | -0.010874 | C | 0.032917  | 0.545672  | -0.003052 |
| S | 4.692249  | 0.228534  | -2.246636 | S | -4.684720 | 0.489325  | 2.253431  |
| S | 2.072959  | 1.591872  | -2.189002 | S | -1.983433 | 1.704379  | 2.149158  |
| S | 3.065396  | -3.202136 | 1.887712  | S | -3.265775 | -2.995727 | -1.947681 |
| S | 0.375715  | -2.008537 | 1.849738  | S | -0.558547 | -1.825935 | -1.988639 |
| C | 1.643954  | -2.743404 | 2.984474  | C | -1.890247 | -2.489081 | -3.080887 |
| C | 3.414267  | 1.016429  | -3.335687 | C | -3.337568 | 1.212190  | 3.304171  |
| C | 2.860794  | 0.010839  | -4.350966 | C | -2.835016 | 0.172827  | 4.314903  |
| C | 4.031708  | 2.236233  | -4.027834 | C | -3.875501 | 2.459141  | 4.013933  |
| C | 2.070753  | -1.725331 | 4.046886  | C | -2.369781 | -1.414163 | -4.064441 |
| C | 1.066494  | -4.013795 | 3.617099  | C | -1.370237 | -3.725541 | -3.821050 |
| C | -0.037180 | 1.995455  | -0.047894 | C | 0.172919  | 2.004731  | 0.080918  |
| C | 0.983875  | 2.782413  | 0.600715  | C | -0.685711 | 2.893058  | -0.630186 |
| C | 0.944969  | 4.181669  | 0.526280  | C | -0.561599 | 4.286769  | -0.529371 |
| C | -0.040421 | 4.829567  | -0.220671 | C | 0.431607  | 4.870901  | 0.253865  |
| C | -1.040064 | 4.096377  | -0.858077 | C | 1.303517  | 4.028169  | 0.942076  |
| C | -1.087471 | 2.697616  | -0.745537 | C | 1.181830  | 2.634064  | 0.865965  |
| C | -1.252737 | -0.200687 | 0.120702  | C | 1.227649  | -0.287910 | -0.149421 |
| C | -1.562683 | -1.265408 | -0.777399 | C | 1.447083  | -1.449646 | 0.652721  |
| C | -2.757032 | -1.996042 | -0.644646 | C | 2.591942  | -2.246148 | 0.539893  |
| C | -3.650582 | -1.702894 | 0.408411  | C | 3.612569  | -1.920870 | -0.392452 |
| C | -3.347686 | -0.670087 | 1.322384  | C | 3.417061  | -0.773620 | -1.203985 |
| C | -2.176884 | 0.094682  | 1.167516  | C | 2.264300  | 0.008899  | -1.083057 |
| S | -2.330519 | 4.890590  | -1.771601 | S | 2.616178  | 4.664125  | 1.966574  |
| S | -2.460469 | 1.949514  | -1.563506 | S | 2.365485  | 1.721220  | 1.837778  |
| C | -2.795335 | 3.368306  | -2.728402 | C | 2.747558  | 3.121237  | 2.995244  |
| C | -1.943154 | 3.234356  | -3.993098 | C | 1.737467  | 3.157956  | 4.147815  |
| C | -4.292442 | 3.398111  | -3.047193 | C | 4.181528  | 2.971977  | 3.509288  |
| S | 2.213990  | 5.085275  | 1.363222  | S | -1.725624 | 5.265936  | -1.456427 |
| S | 2.295989  | 2.141952  | 1.597354  | S | -1.966480 | 2.329819  | -1.736780 |
| C | 2.616643  | 3.715443  | 2.549300  | C | -2.092852 | 3.921532  | -2.685141 |
| C | 1.721247  | 3.787602  | 3.789287  | C | -1.074495 | 3.952212  | -3.830682 |
| C | 4.103027  | 3.772409  | 2.913352  | C | -3.525044 | 4.082219  | -3.201762 |
| S | -1.844903 | 1.251358  | 2.460451  | S | 2.065798  | 1.291592  | -2.302478 |
| S | -4.345052 | -0.311881 | 2.742315  | S | 4.567513  | -0.295333 | -2.478644 |
| C | -3.599445 | 1.360095  | 3.057563  | C | 3.862109  | 1.407672  | -2.708560 |
| C | -4.360656 | 2.448714  | 2.293263  | C | 4.560191  | 2.405653  | -1.774911 |
| C | -3.596928 | 1.625648  | 4.566907  | C | 4.024495  | 1.816336  | -4.176829 |
| S | -0.609580 | -1.612232 | -2.225161 | S | 0.344290  | -1.849243 | 1.996098  |
| S | -3.052822 | -3.228652 | -1.887234 | S | 2.692607  | -3.615842 | 1.683360  |
| C | -1.294527 | -3.318128 | -2.475355 | C | 0.896343  | -3.603338 | 2.139731  |
| C | -0.499038 | -4.346733 | -1.664834 | C | 0.095213  | -4.502715 | 1.189366  |
| C | -1.286544 | -3.646310 | -3.972053 | C | 0.750255  | -4.063440 | 3.594430  |
| C | 5.177151  | -2.021818 | -0.225598 | C | -5.291355 | -1.789202 | 0.273901  |
| O | 6.142446  | -1.400166 | -0.625224 | O | -6.250529 | -1.214384 | 0.770615  |
| O | 5.218646  | -3.294132 | 0.181970  | O | -5.404627 | -3.054695 | -0.220734 |
| C | 6.532242  | -3.930368 | 0.183170  | C | -6.728568 | -3.610668 | -0.220806 |
| C | 6.347168  | -5.364367 | 0.634583  | C | -6.634479 | -5.014605 | -0.792355 |
| C | -4.912606 | -2.475048 | 0.637607  | C | 4.836617  | -2.704350 | -0.584711 |
| O | -5.438551 | -2.565091 | 1.730306  | O | 5.571904  | -2.635001 | -1.561164 |
| O | -5.402036 | -3.025065 | -0.478078 | O | 5.123663  | -3.536660 | 0.453839  |
| C | -6.617786 | -3.818494 | -0.328226 | C | 6.277223  | -4.375707 | 0.284541  |
| C | -7.025014 | -4.300251 | -1.705386 | C | 6.425604  | -5.209843 | 1.544834  |
| H | 2.094444  | 0.484477  | -4.975338 | H | -2.029023 | 0.597105  | 4.926390  |
| H | 2.414091  | -0.854197 | -3.852514 | H | -2.443482 | -0.709186 | 3.800951  |
| H | 3.668844  | -0.344205 | -5.000467 | H | -3.652841 | -0.142365 | 4.975804  |
| H | 3.288475  | 2.729968  | -4.663854 | H | -3.090938 | 2.913250  | 4.631658  |
| H | 4.856153  | 1.916677  | -4.674884 | H | -4.705481 | 2.188956  | 4.678797  |
| H | 4.415636  | 2.959670  | -3.304667 | H | -4.228371 | 3.202512  | 3.294679  |
| H | 1.212625  | -1.448068 | 4.669658  | H | -1.545492 | -1.111062 | -4.721237 |
| H | 2.473710  | -0.816621 | 3.591085  | H | -2.721659 | -0.527990 | -3.529781 |
| H | 2.842763  | -2.161602 | 4.690694  | H | -3.191137 | -1.801200 | -4.681318 |
| H | 1.816486  | -4.480107 | 4.265444  | H | -2.158582 | -4.149688 | -4.455548 |
| H | 0.759870  | -4.739563 | 2.859927  | H | -1.031029 | -4.493606 | -3.121225 |
| H | 0.201253  | -3.765648 | 4.241569  | H | -0.532223 | -3.450007 | -4.472319 |
| H | -0.035496 | 5.913166  | -0.294652 | H | 0.524904  | 5.949832  | 0.324392  |
| H | -2.199405 | 2.309430  | -4.522318 | H | 1.800466  | 2.230038  | 4.728960  |

|   |           |           |           |
|---|-----------|-----------|-----------|
| H | -0.875765 | 3.211929  | -3.756741 |
| H | -2.132728 | 4.082724  | -4.660047 |
| H | -4.582434 | 2.486480  | -3.581147 |
| H | -4.515230 | 4.247542  | -3.702082 |
| H | -4.897864 | 3.486039  | -2.141936 |
| H | 1.940542  | 2.949112  | 4.460234  |
| H | 0.661708  | 3.749106  | 3.521602  |
| H | 1.907401  | 4.722869  | 4.329000  |
| H | 4.356036  | 2.952322  | 3.594431  |
| H | 4.321345  | 4.710738  | 3.434963  |
| H | 4.739652  | 3.706036  | 2.028177  |
| H | -5.401908 | 2.479648  | 2.633705  |
| H | -4.355323 | 2.259728  | 1.216272  |
| H | -3.906264 | 3.429613  | 2.474253  |
| H | -4.626834 | 1.655810  | 4.939246  |
| H | -3.142765 | 2.599593  | 4.781167  |
| H | -3.051880 | 0.851799  | 5.112599  |
| H | -0.940909 | -5.341362 | -1.793388 |
| H | -0.497824 | -4.104035 | -0.598669 |
| H | 0.539987  | -4.380091 | -2.012157 |
| H | -1.728021 | -4.635158 | -4.138050 |
| H | -0.257214 | -3.680954 | -4.345900 |
| H | -1.849443 | -2.910356 | -4.551066 |
| H | 7.183410  | -3.360447 | 0.852047  |
| H | 6.940444  | -3.858674 | -0.828683 |
| H | 5.677327  | -5.906135 | -0.040132 |
| H | 5.934965  | -5.409676 | 1.647090  |
| H | 7.317678  | -5.871471 | 0.635198  |
| H | -7.377763 | -3.183484 | 0.135129  |
| H | -6.401260 | -4.642627 | 0.357559  |
| H | -7.217479 | -3.457419 | -2.376231 |
| H | -7.943133 | -4.891540 | -1.624631 |
| H | -6.248678 | -4.930544 | -2.149455 |

### 3-CO<sub>2</sub>Et<sup>+</sup> (cation)

Structure

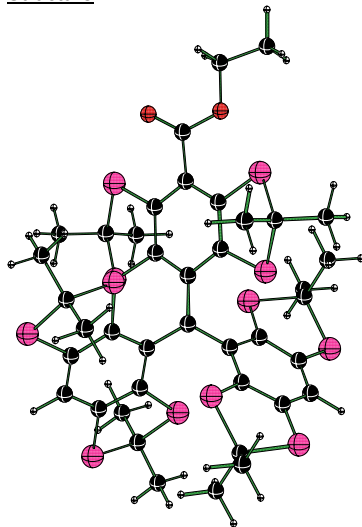

Coordinates

|   |           |           |           |
|---|-----------|-----------|-----------|
| C | -2.878296 | 1.348158  | 0.907034  |
| C | -3.712190 | 0.559513  | 0.086311  |
| C | -3.150179 | -0.428269 | -0.749021 |
| C | -1.761437 | -0.654706 | -0.742367 |
| C | -0.892578 | 0.171312  | 0.044065  |
| C | -1.483089 | 1.178294  | 0.876094  |
| C | 0.548471  | -0.011629 | 0.002600  |
| S | -3.505060 | 2.607234  | 1.987445  |
| S | -0.572722 | 2.227755  | 1.970815  |
| S | -4.106996 | -1.461718 | -1.833025 |

|   |           |           |           |
|---|-----------|-----------|-----------|
| H | 0.716956  | 3.251263  | 3.767220  |
| H | 1.945862  | 4.007660  | 4.810302  |
| H | 4.280158  | 2.041493  | 4.080787  |
| H | 4.433659  | 3.802712  | 4.179900  |
| H | 4.899177  | 2.953034  | 2.685131  |
| H | -1.277888 | 3.136763  | -4.535343 |
| H | -0.057790 | 3.826582  | -3.449341 |
| H | -1.132780 | 4.907454  | -4.367924 |
| H | -3.766742 | 3.269462  | -3.897123 |
| H | -3.628942 | 5.028065  | -3.747799 |
| H | -4.246545 | 4.065382  | -2.381262 |
| H | 5.634548  | 2.444475  | -1.997328 |
| H | 4.430170  | 2.118477  | -0.728090 |
| H | 4.134751  | 3.408030  | -1.905495 |
| H | 5.087944  | 1.863728  | -4.442175 |
| H | 3.597585  | 2.813147  | -4.342081 |
| H | 3.527929  | 1.106621  | -4.843598 |
| H | 0.459025  | -5.536808 | 1.249692  |
| H | 0.186538  | -4.158266 | 0.156037  |
| H | -0.967659 | -4.484202 | 1.458348  |
| H | 1.096547  | -5.098808 | 3.703145  |
| H | -0.304470 | -4.034655 | 3.893356  |
| H | 1.324643  | -3.427062 | 4.272562  |
| H | -7.388819 | -2.970730 | -0.817301 |
| H | -7.115585 | -3.611603 | 0.803860  |
| H | -5.966136 | -5.635950 | -0.187372 |
| H | -6.245767 | -4.992923 | -1.815180 |
| H | -7.626557 | -5.481309 | -0.804656 |
| H | 7.154474  | -3.744622 | 0.105887  |
| H | 6.139655  | -5.001027 | -0.604778 |
| H | 6.554778  | -4.568355 | 2.422554  |
| H | 7.301969  | -5.863225 | 1.459640  |
| H | 5.540040  | -5.832601 | 1.705319  |

### 3-CO<sub>2</sub>Et<sup>-</sup> (anion)

Structure

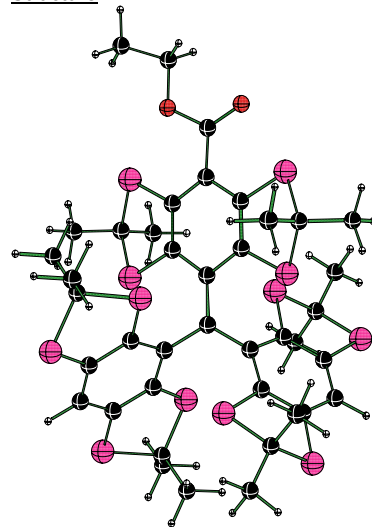

Coordinates

|   |           |           |           |
|---|-----------|-----------|-----------|
| C | 2.866404  | -1.487688 | 0.868718  |
| C | 3.772544  | -0.691792 | 0.120187  |
| C | 3.216697  | 0.349978  | -0.670209 |
| C | 1.841488  | 0.580554  | -0.694665 |
| C | 0.901743  | -0.213578 | 0.043737  |
| C | 1.490761  | -1.257699 | 0.830825  |
| C | -0.523171 | 0.029230  | 0.009386  |
| S | 3.426702  | -2.776435 | 1.970678  |
| S | 0.501720  | -2.296530 | 1.896336  |
| S | 4.191930  | 1.374004  | -1.770693 |



|   |           |           |           |   |           |           |           |
|---|-----------|-----------|-----------|---|-----------|-----------|-----------|
| S | -1.204695 | -1.963770 | -1.793982 | S | 1.288303  | 1.887484  | -1.780736 |
| C | -2.681057 | -1.939106 | -2.916078 | C | 2.774360  | 1.828154  | -2.872894 |
| C | -2.004947 | 2.641347  | 3.077182  | C | 1.893184  | -2.767227 | 3.014751  |
| C | -2.125922 | 1.615901  | 4.209681  | C | 2.035268  | -1.752936 | 4.157634  |
| C | -1.815017 | 4.062039  | 3.619638  | C | 1.650650  | -4.180079 | 3.556175  |
| C | -2.485627 | -0.924484 | -4.047547 | C | 2.595540  | 0.777625  | -3.976802 |
| C | -2.914182 | -3.352753 | -3.459357 | C | 3.024500  | 3.217695  | -3.467415 |
| C | 1.419881  | 1.137246  | -0.037960 | C | -1.465089 | -1.092125 | -0.015338 |
| C | 1.079584  | 2.307136  | -0.808191 | C | -1.261618 | -2.231471 | -0.850363 |
| C | 1.935267  | 3.417768  | -0.812230 | C | -2.154788 | -3.312737 | -0.867878 |
| C | 3.087300  | 3.433649  | -0.023826 | C | -3.310256 | -3.311322 | -0.089758 |
| C | 3.436599  | 2.320249  | 0.738780  | C | -3.553607 | -2.198350 | 0.715595  |
| C | 2.652918  | 1.155479  | 0.709302  | C | -2.661941 | -1.119550 | 0.760206  |
| C | 1.111579  | -1.355523 | 0.008538  | C | -1.044708 | 1.408606  | 0.003335  |
| C | 0.673418  | -2.334826 | 0.958419  | C | -0.591606 | 2.392381  | 0.929837  |
| C | 1.239698  | -3.619966 | 0.958831  | C | -1.097293 | 3.700194  | 0.936508  |
| C | 2.197702  | -3.973901 | 0.008690  | C | -2.086634 | 4.097835  | 0.038201  |
| C | 2.621467  | -3.044913 | -0.943935 | C | -2.555230 | 3.157998  | -0.878984 |
| C | 2.112928  | -1.737258 | -0.943732 | C | -2.047787 | 1.851425  | -0.906433 |
| S | 4.909887  | 2.292175  | 1.718944  | S | -5.005527 | -2.082251 | 1.744106  |
| S | 3.284466  | -0.171320 | 1.687697  | S | -3.122219 | 0.193257  | 1.877289  |
| C | 4.346114  | 0.889458  | 2.797380  | C | -4.245915 | -0.856576 | 2.917331  |
| C | 3.529409  | 1.404781  | 3.985408  | C | -3.447685 | -1.581463 | 4.007101  |
| C | 5.556945  | 0.068940  | 3.249271  | C | -5.344602 | 0.023707  | 3.517795  |
| S | 1.469472  | 4.810837  | -1.796418 | S | -1.746530 | -4.673806 | -1.942941 |
| S | -0.336650 | 2.471846  | -1.853796 | S | 0.117525  | -2.373581 | -1.973069 |
| C | 0.353126  | 3.840498  | -2.918829 | C | -0.674053 | -3.651536 | -3.064095 |
| C | 1.138004  | 3.259937  | -4.098321 | C | -1.524256 | -2.983179 | -4.150559 |
| C | -0.804453 | 4.729220  | -3.382662 | C | 0.417791  | -4.537779 | -3.669125 |
| S | 2.637259  | -0.737747 | -2.305174 | S | -2.625993 | 0.845238  | -2.258287 |
| S | 3.726764  | -3.490927 | -2.248869 | S | -3.727567 | 3.592867  | -2.146508 |
| C | 4.157219  | -1.742033 | -2.710512 | C | -4.165918 | 1.833449  | -2.561858 |
| C | 5.357742  | -1.248635 | -1.898348 | C | -5.307999 | 1.342843  | -1.663612 |
| C | 4.413671  | -1.660744 | -4.218026 | C | -4.538346 | 1.740882  | -4.044254 |
| S | -0.415186 | -2.005141 | 2.310421  | S | 0.531129  | 2.007435  | 2.258916  |
| S | 0.761294  | -4.720339 | 2.257120  | S | -0.514533 | 4.781938  | 2.224449  |
| C | -0.788133 | -3.792658 | 2.696974  | C | 0.998445  | 3.768989  | 2.605935  |
| C | -1.971711 | -4.284509 | 1.858972  | C | 2.167929  | 4.201721  | 1.713404  |
| C | -1.053938 | -3.928199 | 4.198905  | C | 1.342683  | 3.914146  | 4.091036  |
| C | -5.182021 | 0.843137  | 0.127625  | C | 5.200384  | -0.995088 | 0.197962  |
| O | -5.632324 | 1.927184  | 0.444073  | O | 5.682978  | -2.049319 | 0.592838  |
| O | -5.930256 | -0.218060 | -0.190582 | O | 6.000089  | 0.039541  | -0.195838 |
| C | -7.375114 | -0.011100 | -0.200970 | C | 7.407267  | -0.238421 | -0.232043 |
| C | -8.028036 | -1.344539 | -0.501143 | C | 8.108319  | 1.013073  | -0.731449 |
| H | -1.224247 | 1.628632  | 4.832951  | H | 1.122218  | -1.735094 | 4.765904  |
| H | -2.261753 | 0.603361  | 3.819150  | H | 2.200982  | -0.746603 | 3.763371  |
| H | -2.988002 | 1.859961  | 4.840647  | H | 2.883983  | -2.019450 | 4.800951  |
| H | -0.919337 | 4.113394  | 4.248830  | H | 0.737089  | -4.203518 | 4.163092  |
| H | -2.671475 | 4.336994  | 4.245175  | H | 2.484183  | -4.488811 | 4.199565  |
| H | -1.723219 | 4.792629  | 2.812538  | H | 1.548230  | -4.902273 | 2.742320  |
| H | -1.628939 | -1.210958 | -4.668175 | H | 1.747643  | 1.045897  | -4.618874 |
| H | -2.308131 | 0.081214  | -3.656451 | H | 2.397855  | -0.207428 | -3.545685 |
| H | -3.380034 | -0.896427 | -4.680166 | H | 3.501731  | 0.715053  | -4.593272 |
| H | -2.067653 | -3.662820 | -4.081921 | H | 2.178677  | 3.514944  | -4.098974 |
| H | -3.808695 | -3.365527 | -4.091796 | H | 3.922332  | 3.206731  | -4.098094 |
| H | -3.045437 | -4.079131 | -2.653718 | H | 3.154824  | 3.967689  | -2.682993 |
| H | 3.720024  | 4.316376  | -0.011207 | H | -4.001092 | -4.147843 | -0.111356 |
| H | 2.613912  | -4.977106 | 0.007698  | H | -2.480836 | 5.109061  | 0.052695  |
| H | 3.177352  | 0.562260  | 4.591625  | H | -2.976775 | -0.849470 | 4.674288  |
| H | 2.660021  | 1.979692  | 3.654866  | H | -2.658007 | -2.195451 | 3.566280  |
| H | 4.153582  | 2.050123  | 4.613436  | H | -4.108698 | -2.228044 | 4.598298  |
| H | 5.229530  | -0.786919 | 3.849630  | H | -4.901352 | 0.777449  | 4.179295  |
| H | 6.206835  | 0.684182  | 3.881012  | H | -6.033149 | -0.583254 | 4.118576  |
| H | 6.139052  | -0.296361 | 2.399924  | H | -5.914204 | 0.535700  | 2.737976  |
| H | 0.474496  | 2.661486  | -4.733167 | H | -0.890677 | -2.357527 | -4.790984 |
| H | 1.958468  | 2.622151  | -3.757978 | H | -2.291076 | -2.345529 | -3.702916 |
| H | 1.558261  | 4.072013  | -4.702044 | H | -2.017156 | -3.741950 | -4.771884 |
| H | -1.486277 | 4.157237  | -4.021634 | H | 1.082152  | -3.936860 | -4.301646 |
| H | -0.416881 | 5.562290  | -3.979269 | H | -0.028944 | -5.315366 | -4.301192 |

|   |           |           |           |
|---|-----------|-----------|-----------|
| H | -1.366921 | 5.133279  | -2.537871 |
| H | 6.236140  | -1.863322 | -2.125035 |
| H | 5.163970  | -1.302816 | -0.823838 |
| H | 5.584127  | -0.207763 | -2.156347 |
| H | 5.285772  | -2.269695 | -4.479968 |
| H | 4.637024  | -0.627573 | -4.506364 |
| H | 3.554352  | -2.012123 | -4.793755 |
| H | -2.165083 | -5.341072 | 2.075971  |
| H | -1.777124 | -4.180434 | 0.788176  |
| H | -2.871024 | -3.707946 | 2.103801  |
| H | -1.242752 | -4.977884 | 4.448916  |
| H | -1.948393 | -3.359483 | 4.476275  |
| H | -0.208911 | -3.572294 | 4.792807  |
| H | -7.602028 | 0.746502  | -0.956608 |
| H | -7.664392 | 0.387090  | 0.775272  |
| H | -7.775038 | -2.087290 | 0.261629  |
| H | -7.716622 | -1.726655 | -1.477971 |
| H | -9.115942 | -1.220298 | -0.511687 |

|   |           |           |           |
|---|-----------|-----------|-----------|
| H | 1.016741  | -5.015145 | -2.889747 |
| H | -6.204451 | 1.956323  | -1.821193 |
| H | -5.026916 | 1.395766  | -0.608492 |
| H | -5.547077 | 0.298541  | -1.897005 |
| H | -5.435754 | 2.337382  | -4.249387 |
| H | -4.764082 | 0.700990  | -4.308955 |
| H | -3.724523 | 2.096661  | -4.681124 |
| H | 2.419206  | 5.253572  | 1.901306  |
| H | 1.917706  | 4.083118  | 0.656046  |
| H | 3.048564  | 3.583066  | 1.922780  |
| H | 1.603516  | 4.954474  | 4.321199  |
| H | 2.212151  | 3.292628  | 4.335982  |
| H | 0.505208  | 3.611160  | 4.724570  |
| H | 7.590257  | -1.097074 | -0.888100 |
| H | 7.742979  | -0.520657 | 0.772022  |
| H | 7.906362  | 1.861841  | -0.069884 |
| H | 7.763942  | 1.275999  | -1.736537 |
| H | 9.191903  | 0.848292  | -0.764441 |

#### 4-CO<sub>2</sub>Et<sup>+</sup> (cation)

Structure

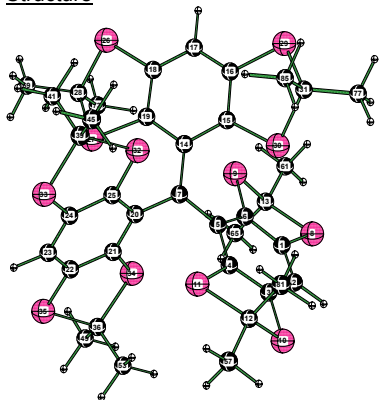

Coordinates

|   |           |           |           |
|---|-----------|-----------|-----------|
| C | 3.184530  | 1.938054  | -0.709366 |
| C | 4.079607  | 1.308624  | 0.157822  |
| C | 3.665207  | 0.230050  | 0.937353  |
| C | 2.349208  | -0.254097 | 0.850833  |
| C | 1.386621  | 0.425712  | 0.024050  |
| C | 1.842522  | 1.536988  | -0.769162 |
| C | 0.003433  | 0.005025  | -0.003695 |
| S | 3.679739  | 3.297492  | -1.726478 |
| S | 0.857293  | 2.444177  | -1.926526 |
| S | 4.782862  | -0.626326 | 2.009478  |
| S | 2.023364  | -1.666865 | 1.859203  |
| C | 3.443266  | -1.395851 | 3.040317  |
| C | 2.285140  | 3.096599  | -2.936727 |
| C | -1.051098 | 0.993148  | -0.038727 |
| C | -0.961710 | 2.205268  | 0.733433  |
| C | -1.994764 | 3.151712  | 0.675654  |
| C | -3.088167 | 2.964119  | -0.171662 |
| C | -3.198273 | 1.802395  | -0.934073 |
| C | -2.225776 | 0.792696  | -0.847385 |
| C | -0.327320 | -1.415866 | 0.005302  |
| C | 0.294939  | -2.321569 | -0.912641 |
| C | -0.056507 | -3.680858 | -0.908070 |
| C | -0.974292 | -4.174747 | 0.020136  |
| C | -1.575502 | -3.314635 | 0.940427  |
| C | -1.286192 | -1.941000 | 0.930091  |
| S | -4.593045 | 1.508739  | -1.983186 |
| S | -2.565307 | -0.634182 | -1.830821 |
| C | -3.745857 | 0.209454  | -3.004771 |
| S | -1.833033 | 4.603966  | 1.672386  |
| S | 0.338663  | 2.610520  | 1.863878  |

#### 4-CO<sub>2</sub>Et<sup>-</sup> (anion)

Structure

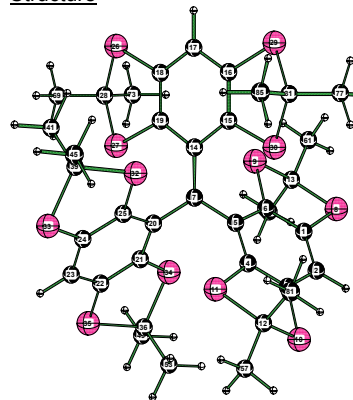

Coordinates

|   |           |           |           |
|---|-----------|-----------|-----------|
| C | -2.945328 | 2.333208  | 0.741598  |
| C | -3.943000 | 1.858022  | -0.108265 |
| C | -3.637443 | 0.763447  | -0.916921 |
| C | -2.371761 | 0.164813  | -0.892015 |
| C | -1.325521 | 0.623826  | -0.033925 |
| C | -1.679838 | 1.733548  | 0.794521  |
| C | -0.004928 | 0.004171  | 0.005165  |
| S | -3.223939 | 3.716902  | 1.831097  |
| S | -0.567244 | 2.426879  | 2.007474  |
| S | -4.830487 | 0.069890  | -2.047199 |
| S | -2.152184 | -1.184548 | -2.039333 |
| C | -3.544586 | -0.680873 | -3.159303 |
| C | -1.899329 | 3.215961  | 3.033067  |
| C | 1.191364  | 0.837358  | 0.067992  |
| C | 1.340622  | 2.028840  | -0.708066 |
| C | 2.488457  | 2.829544  | -0.637228 |
| C | 3.566931  | 2.488000  | 0.177649  |
| C | 3.465122  | 1.317923  | 0.930297  |
| C | 2.317275  | 0.517060  | 0.887752  |
| C | 0.121213  | -1.460057 | -0.023509 |
| C | -0.647575 | -2.315846 | 0.820931  |
| C | -0.518603 | -3.710931 | 0.790189  |
| C | 0.382267  | -4.338982 | -0.069422 |
| C | 1.153838  | -3.532455 | -0.905637 |
| C | 1.029925  | -2.136597 | -0.891647 |
| S | 4.780818  | 0.776469  | 2.006579  |
| S | 2.354060  | -0.913124 | 1.954893  |
| C | 3.663230  | -0.241930 | 3.087320  |
| S | 2.511878  | 4.290990  | -1.658826 |
| S | 0.104342  | 2.583490  | -1.871242 |

|   |           |           |           |   |           |           |           |
|---|-----------|-----------|-----------|---|-----------|-----------|-----------|
| C | -0.648542 | 3.830123  | 2.875112  | C | 1.265681  | 3.633609  | -2.869566 |
| S | -2.021168 | -1.017308 | 2.247059  | S | 1.960721  | -1.280859 | -2.149323 |
| S | -2.641783 | -3.912417 | 2.217060  | S | 2.243159  | -4.232283 | -2.128624 |
| S | 1.359791  | -1.835244 | -2.238348 | S | -1.712949 | -1.682249 | 2.103072  |
| S | 0.629500  | -4.702277 | -2.177094 | S | -1.457896 | -4.633156 | 1.989852  |
| C | 2.026403  | -3.544500 | -2.582500 | C | -2.662185 | -3.258985 | 2.333530  |
| H | -3.863530 | 3.722606  | -0.227763 | H | 4.455334  | 3.109336  | 0.222845  |
| H | -1.222106 | -5.232181 | 0.026036  | H | 0.480281  | -5.419805 | -0.086371 |
| C | -3.373740 | -2.250483 | 2.614867  | C | 3.177467  | -2.652910 | -2.428591 |
| H | 5.107960  | 1.653340  | 0.215171  | H | -4.922267 | 2.324169  | -0.140329 |
| C | -4.600651 | -1.976084 | 1.740962  | C | 4.353716  | -2.536627 | -1.451703 |
| H | -5.374194 | -2.725468 | 1.943040  | H | 5.049722  | -3.373570 | -1.594047 |
| H | -5.009147 | -0.984378 | 1.966329  | H | 4.890545  | -1.595531 | -1.620330 |
| H | -4.351556 | -2.012192 | 0.677160  | H | 4.002675  | -2.542628 | -0.416670 |
| C | -3.709045 | -2.186362 | 4.107674  | C | 3.652751  | -2.615644 | -3.883951 |
| H | -4.126000 | -1.204675 | 4.358332  | H | 4.168248  | -1.668973 | -4.085572 |
| H | -4.469772 | -2.936594 | 4.349596  | H | 4.365454  | -3.428077 | -4.072459 |
| H | -2.828637 | -2.367000 | 4.728702  | H | 2.814400  | -2.713508 | -4.578353 |
| C | 2.362701  | -3.653910 | -4.072341 | C | -3.135717 | -3.354351 | 3.786825  |
| H | 3.167069  | -2.955666 | -4.329011 | H | -3.821410 | -2.528815 | 4.012394  |
| H | 2.721277  | -4.663944 | -4.298704 | H | -3.681448 | -4.292216 | 3.948554  |
| H | 1.494428  | -3.441173 | -4.700310 | H | -2.293979 | -3.311589 | 4.482667  |
| C | 3.242893  | -3.833601 | -1.698803 | C | -3.840397 | -3.327258 | 1.354221  |
| H | 4.049006  | -3.126697 | -1.925771 | H | -4.534610 | -2.499526 | 1.542220  |
| H | 2.997453  | -3.747483 | -0.636992 | H | -3.493669 | -3.246701 | 0.320754  |
| H | 3.606661  | -4.849409 | -1.890175 | H | -4.378653 | -4.276520 | 1.473751  |
| C | 3.913790  | -2.755543 | 3.562983  | C | -4.121949 | -1.925027 | -3.838294 |
| H | 4.763776  | -2.619281 | 4.240435  | H | -4.963006 | -1.649612 | -4.486746 |
| H | 3.112603  | -3.238086 | 4.133503  | H | -3.358001 | -2.398464 | -4.466495 |
| H | 4.217884  | -3.418505 | 2.749483  | H | -4.468240 | -2.654345 | -3.101514 |
| C | 1.898165  | 4.464769  | -3.504674 | C | -1.334102 | 4.464003  | 3.715670  |
| H | 2.736237  | 4.880656  | -4.074583 | H | -2.115239 | 4.965907  | 4.300316  |
| H | 1.052150  | 4.361949  | -4.193263 | H | -0.530891 | 4.182434  | 4.407362  |
| H | 1.627000  | 5.168350  | -2.714255 | H | -0.932761 | 5.168302  | 2.982694  |
| C | 2.662230  | 2.104134  | -4.039724 | C | -2.455003 | 2.218567  | 4.056155  |
| H | 1.821286  | 1.971188  | -4.730000 | H | -1.656245 | 1.892611  | 4.733508  |
| H | 3.520837  | 2.483516  | -4.604866 | H | -3.255200 | 2.682199  | 4.647600  |
| H | 2.926362  | 1.127703  | -3.624497 | H | -2.856992 | 1.334205  | 3.554737  |
| C | -4.774360 | -0.817043 | -3.487053 | C | 4.456078  | -1.405077 | 3.687869  |
| H | -5.487409 | -0.337070 | -4.166193 | H | 5.249505  | -1.026624 | 4.344318  |
| H | -4.275636 | -1.616704 | -4.045677 | H | 3.795189  | -2.036641 | 4.293504  |
| H | -5.327220 | -1.258574 | -2.654602 | H | 4.908332  | -2.021767 | 2.906951  |
| C | -2.980982 | 0.842271  | -4.170406 | C | 3.032595  | 0.630914  | 4.178280  |
| H | -2.242912 | 1.568145  | -3.818349 | H | 2.462530  | 1.451447  | 3.734825  |
| H | -2.458547 | 0.066561  | -4.741801 | H | 2.346994  | 0.029673  | 4.787632  |
| H | -3.680568 | 1.356814  | -4.838460 | H | 3.810088  | 1.052445  | 4.828408  |
| C | 0.302699  | 4.900416  | 3.417132  | C | 0.486021  | 4.799952  | -3.481981 |
| H | -0.264270 | 5.651445  | 3.977986  | H | 1.157930  | 5.445972  | -4.060919 |
| H | 1.023158  | 4.449391  | 4.108512  | H | -0.281494 | 4.419979  | -4.167080 |
| H | 0.848562  | 5.400276  | 2.613644  | H | -0.002005 | 5.398750  | -2.708924 |
| C | 3.020760  | -0.460166 | 4.176109  | C | -3.061809 | 0.347377  | -4.188755 |
| H | 2.196623  | -0.907180 | 4.743554  | H | -2.279209 | -0.093239 | -4.818244 |
| H | 3.864071  | -0.295670 | 4.856043  | H | -3.894361 | 0.668343  | -4.828103 |
| H | 2.690567  | 0.509512  | 3.793324  | H | -2.643098 | 1.226000  | -3.691077 |
| C | -1.402724 | 3.112917  | 3.997949  | C | 1.960024  | 2.793694  | -3.947755 |
| H | -0.693209 | 2.615747  | 4.669260  | H | 1.215085  | 2.381270  | -4.639202 |
| H | -1.983167 | 3.837885  | 4.579438  | H | 2.669436  | 3.409637  | -4.515508 |
| H | -2.088807 | 2.359489  | 3.601387  | H | 2.503605  | 1.959351  | -3.496799 |

**1-CO<sub>2</sub>H**  
Structure

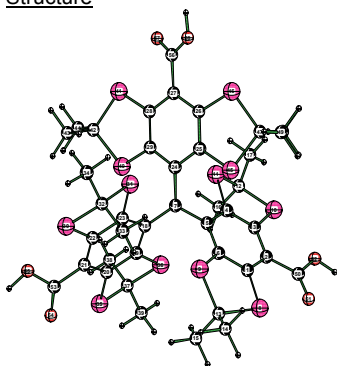

Coordinates

|   |           |           |           |
|---|-----------|-----------|-----------|
| C | -1.576003 | -3.351450 | -0.961775 |
| C | -2.694126 | -3.403191 | -0.097727 |
| C | -2.916771 | -2.326662 | 0.799164  |
| C | -2.069420 | -1.207299 | 0.784376  |
| C | -0.942656 | -1.136940 | -0.081244 |
| C | -0.729899 | -2.226789 | -0.962495 |
| C | -0.037568 | 0.028040  | -0.067636 |
| S | -1.197436 | -4.627077 | -2.135126 |
| S | 0.476908  | -2.174208 | -2.260788 |
| S | -4.235899 | -2.274164 | 1.997492  |
| S | -2.484006 | 0.099843  | 1.916075  |
| C | -3.464814 | -0.966906 | 3.060807  |
| C | 0.499743  | -3.995333 | -2.563296 |
| C | 0.763719  | -4.254770 | -4.050908 |
| C | 1.552246  | -4.677193 | -1.679725 |
| C | -2.558438 | -1.603789 | 4.121259  |
| C | -4.574368 | -0.127989 | 3.704090  |
| C | 1.422368  | -0.168037 | -0.041674 |
| C | 2.026906  | -1.151340 | 0.784476  |
| C | 3.420985  | -1.323102 | 0.813828  |
| C | 4.260295  | -0.525996 | 0.006476  |
| C | 3.675619  | 0.443876  | -0.837664 |
| C | 2.282969  | 0.625260  | -0.847243 |
| C | -0.595865 | 1.394775  | -0.047248 |
| C | -1.610898 | 1.789925  | -0.961152 |
| C | -2.154756 | 3.086270  | -0.946030 |
| C | -1.693784 | 4.037803  | -0.007938 |
| C | -0.691900 | 3.661868  | 0.914187  |
| C | -0.149699 | 2.364915  | 0.890109  |
| S | 4.599967  | 1.477463  | -1.956816 |
| S | 1.679683  | 1.881238  | -1.954733 |
| C | 3.161270  | 1.852865  | -3.063511 |
| C | 3.012121  | 0.775941  | -4.144112 |
| C | 3.352748  | 3.242278  | -3.679921 |
| S | 4.042779  | -2.578401 | 1.907746  |
| S | 1.104990  | -2.232740 | 1.855143  |
| C | 2.526831  | -2.619623 | 2.976556  |
| C | 2.628372  | -1.581158 | 4.099978  |
| C | 2.351066  | -4.034647 | 3.537367  |
| S | 0.973149  | 1.982040  | 2.208467  |
| S | -0.097376 | 4.743126  | 2.190228  |
| C | 1.420643  | 3.740935  | 2.566562  |
| C | 2.594661  | 4.190622  | 1.688379  |
| C | 1.748544  | 3.881301  | 4.056955  |
| S | -2.143330 | 0.745992  | -2.293209 |
| S | -3.385498 | 3.420189  | -2.187609 |
| C | -3.736107 | 1.640872  | -2.577851 |
| C | -4.838899 | 1.093821  | -1.663780 |
| C | -4.121115 | 1.522580  | -4.056272 |
| C | -3.614099 | -4.551091 | -0.244898 |
| O | -3.451986 | -5.472516 | -1.027104 |

**1-CO<sub>2</sub>Na**  
Structure

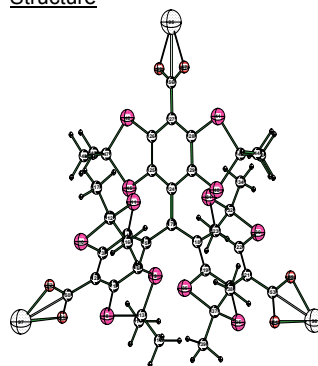

Coordinates

|   |           |           |           |
|---|-----------|-----------|-----------|
| C | -1.796540 | -3.261211 | -0.911063 |
| C | -2.905881 | -3.231739 | -0.042691 |
| C | -3.044411 | -2.141708 | 0.843581  |
| C | -2.133194 | -1.074661 | 0.814946  |
| C | -1.012760 | -1.081673 | -0.060646 |
| C | -0.880712 | -2.194055 | -0.932743 |
| C | -0.033998 | 0.021956  | -0.063138 |
| S | -1.509378 | -4.577149 | -2.073551 |
| S | 0.316608  | -2.235146 | -2.244745 |
| S | -4.355048 | -2.032313 | 2.045319  |
| S | -2.467184 | 0.262222  | 1.939129  |
| C | -3.521217 | -0.733639 | 3.082865  |
| C | 0.226076  | -4.059869 | -2.505298 |
| C | 0.484086  | -4.370358 | -3.983820 |
| C | 1.232592  | -4.781557 | -1.599404 |
| C | -2.660470 | -1.391809 | 4.168972  |
| C | -4.589758 | 0.176579  | 3.698198  |
| C | 1.409711  | -0.269465 | -0.047630 |
| C | 1.958412  | -1.282423 | 0.783718  |
| C | 3.337762  | -1.544141 | 0.803469  |
| C | 4.218716  | -0.825042 | -0.025429 |
| C | 3.691244  | 0.172670  | -0.865061 |
| C | 2.316414  | 0.456904  | -0.864706 |
| C | -0.503022 | 1.421793  | -0.047064 |
| C | -1.500317 | 1.876729  | -0.952137 |
| C | -1.954430 | 3.206077  | -0.936957 |
| C | -1.424317 | 4.134162  | -0.021020 |
| C | -0.433748 | 3.704605  | 0.882959  |
| C | 0.015940  | 2.373441  | 0.873753  |
| S | 4.699635  | 1.124730  | -1.982492 |
| S | 1.802661  | 1.754912  | -1.969735 |
| C | 3.282971  | 1.629233  | -3.072865 |
| C | 3.048703  | 0.584624  | -4.171371 |
| C | 3.577546  | 3.008120  | -3.672556 |
| S | 3.893541  | -2.807825 | 1.929687  |
| S | 0.976128  | -2.287528 | 1.879429  |
| C | 2.378731  | -2.733777 | 3.000805  |
| C | 2.546650  | -1.678561 | 4.101110  |
| C | 2.118869  | -4.121246 | 3.596857  |
| S | 1.126551  | 1.933812  | 2.188616  |
| S | 0.273058  | 4.772270  | 2.118652  |
| C | 1.716541  | 3.659945  | 2.487623  |
| C | 2.900719  | 3.991263  | 1.570809  |
| C | 2.094814  | 3.810848  | 3.964883  |
| S | -2.120719 | 0.867515  | -2.274008 |
| S | -3.168584 | 3.641844  | -2.161923 |
| C | -3.636884 | 1.886424  | -2.559664 |
| C | -4.779988 | 1.415615  | -1.651397 |
| C | -4.027297 | 1.799122  | -4.038889 |
| C | -3.966657 | -4.281193 | -0.125544 |
| O | -3.805264 | -5.248079 | -0.938360 |

|   |           |           |           |
|---|-----------|-----------|-----------|
| O | -4.711130 | -4.500072 | 0.545934  |
| C | 5.718372  | -0.772561 | 0.068363  |
| O | 6.229147  | -1.812408 | 0.441838  |
| O | 6.467915  | 0.290372  | -0.308856 |
| C | -2.229381 | 5.415253  | 0.081652  |
| O | -2.141185 | 6.128389  | 1.064498  |
| O | -2.823537 | 5.848935  | -1.054323 |
| H | 1.757946  | -3.886529 | -4.329803 |
| H | 0.016355  | -3.766702 | -4.681223 |
| H | 0.743333  | -5.332009 | -4.252486 |
| H | 2.554985  | -4.312000 | -1.930624 |
| H | 1.525390  | -5.762253 | -1.836685 |
| H | 1.370574  | -4.475666 | -0.620614 |
| H | -2.096836 | -0.823930 | 4.738163  |
| H | -1.760857 | -2.189772 | 3.656876  |
| H | -3.144950 | -2.265415 | 4.769857  |
| H | -5.188267 | -0.755364 | 4.360692  |
| H | -5.220360 | 0.327867  | 2.949766  |
| H | -4.136931 | 0.666221  | 4.319743  |
| H | 2.144452  | 0.995115  | -4.776991 |
| H | 2.870177  | -0.212584 | -3.699137 |
| H | 3.909424  | 0.748135  | -4.773779 |
| H | 2.496181  | 3.492566  | -4.316102 |
| H | 4.248366  | 3.253349  | -4.311807 |
| H | 3.456114  | 4.011871  | -2.911013 |
| H | 1.722290  | -1.600664 | 4.716978  |
| H | 2.745003  | -0.572128 | 3.695266  |
| H | 3.492697  | -1.800993 | 4.737878  |
| H | 1.446110  | -4.089138 | 4.153544  |
| H | 3.202396  | -4.292343 | 4.177950  |
| H | 2.277418  | -4.776439 | 2.738265  |
| H | 2.823568  | 5.245395  | 1.882269  |
| H | 2.362450  | 4.075985  | 0.626073  |
| H | 3.485902  | 3.591991  | 1.909982  |
| H | 1.978605  | 4.926654  | 4.293015  |
| H | 2.633042  | 3.284485  | 4.308153  |
| H | 0.913718  | 3.556652  | 4.683021  |
| H | -5.766777 | 1.657695  | -1.817583 |
| H | -4.556554 | 1.170503  | -0.610266 |
| H | -5.027893 | 0.038444  | -1.891537 |
| H | -5.047983 | 2.075165  | -4.248460 |
| H | -4.302883 | 0.473096  | -4.314379 |
| H | -3.336359 | 1.914965  | -4.707650 |
| H | 7.396807  | -0.006361 | -0.275314 |
| H | -3.168517 | 6.740156  | -0.857590 |
| H | -5.228308 | -5.300420 | 0.336844  |

**1-CO<sub>2</sub>H-H**  
Structure

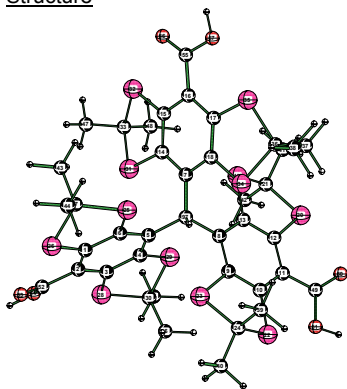

Coordinates

|   |          |           |           |
|---|----------|-----------|-----------|
| C | 2.861090 | -2.583529 | -0.961944 |
| C | 2.625574 | -3.533339 | 0.053302  |
| C | 1.532835 | -3.342946 | 0.925455  |

|    |           |           |           |
|----|-----------|-----------|-----------|
| O  | -5.008525 | -4.149359 | 0.595253  |
| C  | 5.685204  | -1.115719 | -0.014702 |
| O  | 6.070280  | -2.258616 | 0.392759  |
| O  | 6.482229  | -0.206788 | -0.413934 |
| C  | -1.904634 | 5.550453  | -0.008650 |
| O  | -1.714440 | 6.243257  | 1.041863  |
| O  | -2.482239 | 6.000428  | -1.049889 |
| H  | 1.501909  | -4.073547 | -4.264053 |
| H  | -0.225998 | -3.848606 | -4.630337 |
| H  | 0.394323  | -5.448682 | -4.162079 |
| H  | 2.257483  | -4.490011 | -1.858570 |
| H  | 1.134127  | -5.867690 | -1.720387 |
| H  | 1.064995  | -4.532725 | -0.548020 |
| H  | -2.156452 | -0.626325 | 4.771312  |
| H  | -1.895793 | -2.034448 | 3.724419  |
| H  | -3.288377 | -2.003483 | 4.828838  |
| H  | -5.249505 | -0.406106 | 4.352534  |
| H  | -5.197331 | 0.655459  | 2.926200  |
| H  | -4.120479 | 0.955952  | 4.310339  |
| H  | 2.216578  | 0.890614  | -4.816650 |
| H  | 2.805716  | -0.390201 | -3.739712 |
| H  | 3.950573  | 0.476802  | -4.786810 |
| H  | 2.748730  | 3.328127  | -4.314932 |
| H  | 4.480100  | 2.963139  | -4.293995 |
| H  | 3.726946  | 3.758784  | -2.892417 |
| H  | 1.640599  | -1.621831 | 4.716421  |
| H  | 2.729495  | -0.690112 | 3.671023  |
| H  | 3.394777  | -1.938922 | 4.746507  |
| H  | 1.203338  | -4.111943 | 4.200247  |
| H  | 2.946531  | -4.408043 | 4.256711  |
| H  | 2.016093  | -4.878093 | 2.815119  |
| H  | 3.230246  | 5.023613  | 1.742953  |
| H  | 2.625366  | 3.885693  | 0.518016  |
| H  | 3.740529  | 3.315433  | 1.771654  |
| H  | 2.429682  | 4.835893  | 4.163988  |
| H  | 2.923805  | 3.138479  | 4.216124  |
| H  | 1.248095  | 3.586312  | 4.618497  |
| H  | -5.660262 | 2.054569  | -1.795770 |
| H  | -4.490205 | 1.457648  | -0.597848 |
| H  | -5.053927 | 0.380580  | -1.888328 |
| H  | -4.898370 | 2.435603  | -4.235880 |
| H  | -4.303580 | 0.770453  | -4.298922 |
| H  | -3.207108 | 2.118075  | -4.686939 |
| Na | -2.695171 | 7.902821  | 0.009761  |
| Na | 8.117939  | -1.598392 | 0.004905  |
| Na | -5.755864 | -5.997608 | -0.301165 |

**1-CO<sub>2</sub>Na-H**  
Structure

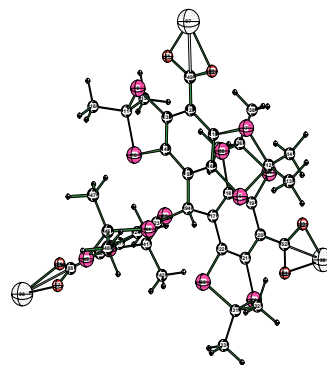

Coordinates

|   |          |           |           |
|---|----------|-----------|-----------|
| C | 1.718973 | -3.412725 | 0.915417  |
| C | 2.753224 | -3.386888 | -0.038984 |
| C | 2.866223 | -2.263426 | -0.881767 |

|   |           |           |           |   |           |           |           |
|---|-----------|-----------|-----------|---|-----------|-----------|-----------|
| C | 0.696013  | -2.211670 | 0.791834  | C | 2.006865  | -1.154361 | -0.729546 |
| C | 0.923638  | -1.253813 | -0.220378 | C | 0.986070  | -1.158388 | 0.243082  |
| C | 2.015391  | -1.469333 | -1.090594 | C | 0.871591  | -2.301436 | 1.062911  |
| C | 0.679700  | 1.353822  | -0.243113 | S | 1.438761  | -4.781386 | 2.017380  |
| C | -1.456884 | -0.161149 | -0.185605 | S | -0.288729 | -2.390481 | 2.413841  |
| C | -2.192670 | -1.086199 | -0.957832 | S | 4.099386  | -2.147121 | -2.161947 |
| C | -3.579803 | -1.251402 | -0.810154 | S | 2.347543  | 0.226411  | -1.802173 |
| C | -4.276938 | -0.478748 | 0.141316  | C | 3.282509  | -0.744460 | -3.062370 |
| C | -3.558246 | 0.455084  | 0.916538  | C | -0.257196 | -4.231580 | 2.551017  |
| C | -2.164392 | 0.610384  | 0.756261  | C | -0.473502 | -4.632958 | 4.014223  |
| C | 1.676542  | 1.612010  | 0.717844  | C | -1.325566 | -4.849246 | 1.639056  |
| C | 2.239267  | 2.899964  | 0.848077  | C | 2.335274  | -1.285022 | -4.141601 |
| C | 1.834500  | 3.956733  | -0.000075 | C | 4.363330  | 0.152745  | -3.676835 |
| C | 0.821720  | 3.712625  | -0.956293 | C | -1.458366 | -0.215626 | 0.228983  |
| C | 0.281837  | 2.420102  | -1.079017 | C | -1.970935 | -1.125040 | -0.717569 |
| S | -1.426709 | 1.858404  | 1.794346  | C | -3.362549 | -1.306752 | -0.865574 |
| S | -4.347202 | 1.507892  | 2.109828  | C | -4.275676 | -0.597519 | -0.066022 |
| C | -2.793924 | 1.896393  | 3.040766  | C | -3.774306 | 0.306911  | 0.883698  |
| S | -4.339844 | -2.438372 | -1.898700 | C | -2.389454 | 0.492929  | 1.017678  |
| S | -1.418086 | -2.155909 | -2.154894 | C | 0.575413  | 1.429833  | 0.251362  |
| C | -2.958309 | -2.441770 | -3.137877 | C | 1.589908  | 1.908966  | 1.111837  |
| S | 2.366457  | -0.394942 | -2.464768 | C | 2.129220  | 3.198632  | 0.981838  |
| S | 4.164750  | -2.731391 | -2.156529 | C | 1.645724  | 4.068823  | -0.009935 |
| C | 4.121132  | -0.947718 | -2.671879 | C | 0.630679  | 3.614620  | -0.868781 |
| S | 1.125115  | -4.462043 | 2.248615  | C | 0.105006  | 2.308954  | -0.748343 |
| S | -0.548906 | -2.053363 | 2.053340  | S | -4.813558 | 1.252127  | 1.977447  |
| C | -0.608932 | -3.851306 | 2.467274  | S | -1.898053 | 1.718739  | 2.215922  |
| S | 2.348968  | 0.375458  | 1.804814  | C | -3.459491 | 1.610383  | 3.201694  |
| S | 3.479867  | 3.100252  | 2.103452  | C | -3.362438 | 0.488523  | 4.242633  |
| C | 3.036024  | 1.562397  | 3.040829  | C | -3.728675 | 2.965117  | 3.864177  |
| S | -0.868169 | 2.183586  | -2.420044 | S | -3.892330 | -2.485318 | -2.090613 |
| S | 0.195320  | 4.923901  | -2.100033 | S | -0.964296 | -2.147267 | -1.780817 |
| C | -1.314982 | 3.967163  | -2.591140 | C | -2.292228 | -2.474660 | -3.026390 |
| C | -2.489101 | 4.318192  | -1.668991 | C | -2.305648 | -1.386597 | -4.107242 |
| C | -1.640455 | 4.269425  | -4.058001 | C | -2.063372 | -3.860883 | -3.639491 |
| C | -3.158301 | -1.330663 | -4.175010 | S | -1.068235 | 1.861841  | -2.009892 |
| C | -2.883858 | -3.821566 | -3.799173 | S | -0.036756 | 4.628688  | -2.170449 |
| C | -2.900123 | 3.312937  | 3.617048  | C | -1.558158 | 3.594969  | -2.415800 |
| C | -2.554368 | 0.862547  | 4.147652  | C | -2.690385 | 4.068043  | -1.495094 |
| C | 5.049545  | -0.107061 | -1.787107 | C | -1.973752 | 3.662179  | -3.889258 |
| C | 4.510618  | -0.847904 | -4.150426 | S | 2.219443  | 0.948495  | 2.475318  |
| C | -1.013145 | -4.012361 | 3.936594  | S | 3.390979  | 3.656156  | 2.149296  |
| C | -1.569081 | -4.599025 | 1.534785  | C | 3.791280  | 1.909560  | 2.643777  |
| C | 4.310840  | 0.965726  | 3.649112  | C | 4.871992  | 1.323624  | 1.726400  |
| C | 1.998876  | 1.877313  | 4.126180  | C | 4.234753  | 1.895691  | 4.110238  |
| C | -5.739412 | -0.577393 | 0.345588  | C | 3.765513  | -4.485885 | -0.086052 |
| O | -6.432714 | 0.292886  | 0.838649  | O | 3.645030  | -5.456277 | 0.730680  |
| O | -6.265040 | -1.762093 | -0.048975 | O | 4.729645  | -4.393968 | -0.912726 |
| C | 3.536959  | -4.698439 | 0.123947  | C | -5.750297 | -0.800644 | -0.212757 |
| O | 4.233758  | -5.084817 | -0.796497 | O | -6.163033 | -1.884490 | -0.737057 |
| O | 3.562245  | -5.307068 | 1.332541  | O | -6.527182 | 0.121857  | 0.196182  |
| C | 2.561571  | 5.239952  | 0.112925  | C | 2.204308  | 5.450536  | -0.142361 |
| O | 3.534782  | 5.423086  | 0.823706  | O | 2.061807  | 6.057432  | -1.251860 |
| O | 2.080500  | 6.232824  | -0.671222 | O | 2.799594  | 5.956789  | 0.862789  |
| H | -2.718613 | 5.387670  | -1.746224 | H | -1.462147 | -4.306355 | 4.358338  |
| H | -2.255285 | 4.087456  | -0.626271 | H | 0.288264  | -4.196122 | 4.664781  |
| H | -3.379472 | 3.746751  | -1.955883 | H | -0.434542 | -5.724505 | 4.112457  |
| H | -1.875333 | 5.333256  | -4.178319 | H | -2.326742 | -4.529034 | 1.951805  |
| H | -2.522173 | 3.699922  | -4.373555 | H | -1.273691 | -5.943967 | 1.690767  |
| H | -0.803922 | 4.017992  | -4.714444 | H | -1.179974 | -4.544270 | 0.599248  |
| H | -2.327597 | -1.328390 | -4.890141 | H | 1.840879  | -0.456328 | -4.662851 |
| H | -3.203037 | -0.348282 | -3.696877 | H | 1.563161  | -1.919099 | -3.698578 |
| H | -4.093898 | -1.492460 | -4.723277 | H | 2.897157  | -1.878441 | -4.873771 |
| H | -2.054908 | -3.851785 | -4.515349 | H | 4.952977  | -0.414129 | -4.407619 |
| H | -3.807737 | -4.022182 | -4.353751 | H | 5.038070  | 0.544020  | -2.911298 |
| H | -2.739116 | -4.613475 | -3.060227 | H | 3.903618  | 0.996559  | -4.204985 |
| H | -3.726790 | 3.364715  | 4.335063  | H | -2.553883 | 0.697473  | 4.953265  |
| H | -3.071668 | 4.053410  | 2.831983  | H | -3.158049 | -0.473183 | 3.763835  |
| H | -1.980705 | 3.574757  | 4.153385  | H | -4.305968 | 0.406297  | 4.796116  |
| H | -3.383976 | 0.881498  | 4.864555  | H | -2.930381 | 3.206595  | 4.575752  |

|   |           |           |           |
|---|-----------|-----------|-----------|
| H | -1.623477 | 1.086711  | 4.681565  |
| H | -2.476527 | -0.146693 | 3.735239  |
| H | 6.081839  | -0.463877 | -1.884428 |
| H | 4.758801  | -0.170062 | -0.734927 |
| H | 5.011694  | 0.945631  | -2.090497 |
| H | 5.539196  | -1.200162 | -4.289893 |
| H | 4.470972  | 0.195630  | -4.483151 |
| H | 3.847372  | -1.444892 | -4.781146 |
| H | -2.027554 | -3.627429 | 4.092307  |
| H | -0.327687 | -3.480859 | 4.601425  |
| H | -1.018200 | -5.073538 | 4.210906  |
| H | -2.589669 | -4.219456 | 1.660164  |
| H | -1.560952 | -5.670344 | 1.768749  |
| H | -1.284554 | -4.470561 | 0.487019  |
| H | 4.750470  | 1.670466  | 4.364548  |
| H | 5.053523  | 0.739569  | 2.880156  |
| H | 4.075942  | 0.044125  | 4.194093  |
| H | 2.408570  | 2.603065  | 4.839103  |
| H | 1.731005  | 0.962770  | 4.668577  |
| H | 1.088421  | 2.295178  | 3.689051  |
| H | -7.228403 | -1.690096 | 0.087227  |
| H | 4.160768  | -6.071775 | 1.238231  |
| H | 2.668351  | 6.997013  | -0.522329 |
| C | 0.041444  | -0.023199 | -0.527429 |
| H | 0.007949  | -0.048768 | -1.626877 |

**1-CO<sub>2</sub>H+**  
Structure

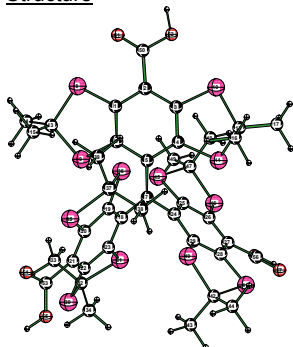

Coordinates

|   |           |           |           |
|---|-----------|-----------|-----------|
| C | -2.968794 | -2.219705 | 0.942023  |
| C | -2.808614 | -3.252667 | -0.015402 |
| C | -1.669875 | -3.265811 | -0.856898 |
| C | -0.666596 | -2.283184 | -0.708319 |
| C | -0.874317 | -1.167022 | 0.173059  |
| C | -2.021452 | -1.186629 | 1.022308  |
| C | 0.029587  | -0.027262 | 0.163603  |
| S | -4.284452 | -2.179526 | 2.123904  |
| S | -2.191434 | -0.091859 | 2.392997  |
| S | -1.356949 | -4.508532 | -2.088473 |
| S | 0.781646  | -2.519359 | -1.684801 |
| C | -0.018742 | -3.578757 | -2.971676 |
| C | -3.987405 | -0.430876 | 2.691917  |
| C | -4.266957 | -0.344408 | 4.197080  |
| C | -4.865846 | 0.542981  | 1.898635  |
| C | -0.610630 | -2.713543 | -4.089957 |
| C | 1.013534  | -4.574868 | -3.511021 |
| C | -0.490792 | 1.328560  | 0.104780  |
| C | -1.631907 | 1.657793  | -0.700052 |
| C | -2.043374 | 3.000379  | -0.833875 |
| C | -1.386755 | 4.022716  | -0.121566 |
| C | -0.305838 | 3.706813  | 0.733595  |
| C | 0.162700  | 2.386898  | 0.815990  |
| C | 1.471191  | -0.251763 | 0.121345  |
| C | 2.089752  | -1.155169 | 1.041106  |
| C | 3.464072  | -1.439666 | 0.968037  |

|    |           |           |           |
|----|-----------|-----------|-----------|
| H  | -4.671232 | 2.928635  | 4.423459  |
| H  | -3.792673 | 3.765752  | 3.122962  |
| H  | -1.348450 | -1.366966 | -4.641916 |
| H  | -2.469409 | -0.399319 | -3.667910 |
| H  | -3.108183 | -1.583822 | -4.829019 |
| H  | -1.111534 | -3.885529 | -4.183369 |
| H  | -2.860051 | -4.090957 | -4.357242 |
| H  | -2.048705 | -4.638457 | -2.871704 |
| H  | -2.954119 | 5.107331  | -1.728101 |
| H  | -2.393175 | 4.013042  | -0.444200 |
| H  | -3.579212 | 3.440218  | -1.629243 |
| H  | -2.236680 | 4.692146  | -4.158600 |
| H  | -2.859204 | 3.039296  | -4.063701 |
| H  | -1.168761 | 3.323147  | -4.546323 |
| H  | 5.788954  | 1.921470  | 1.800772  |
| H  | 4.543859  | 1.319188  | 0.683392  |
| H  | 5.100381  | 0.291209  | 2.016876  |
| H  | 5.150472  | 2.487104  | 4.229772  |
| H  | 4.458180  | 0.871425  | 4.431050  |
| H  | 3.463167  | 2.309297  | 4.764453  |
| C  | 0.032357  | 0.015596  | 0.553321  |
| H  | 0.008514  | 0.019978  | 1.653295  |
| Na | 3.132370  | 7.741678  | -0.356027 |
| Na | 5.481111  | -6.283467 | -0.113059 |
| Na | -8.196533 | -1.135468 | -0.447136 |

**1-CO<sub>2</sub>Na+**  
Structure

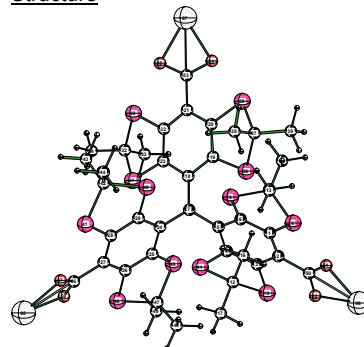

Coordinates

|   |           |           |           |
|---|-----------|-----------|-----------|
| C | 2.614622  | -2.618280 | -0.920424 |
| C | 2.271474  | -3.648802 | -0.017885 |
| C | 1.148964  | -3.499940 | 0.822283  |
| C | 0.318484  | -2.366765 | 0.714693  |
| C | 0.692058  | -1.280718 | -0.146263 |
| C | 1.834278  | -1.454437 | -0.987964 |
| C | -0.043535 | -0.025220 | -0.123964 |
| S | 3.963224  | -2.744265 | -2.064861 |
| S | 2.188318  | -0.370972 | -2.338330 |
| S | 0.671776  | -4.726485 | 2.016249  |
| S | -1.133287 | -2.392586 | 1.719514  |
| C | -0.480617 | -3.606769 | 2.952591  |
| C | 3.920885  | -0.961283 | -2.606140 |
| C | 4.247181  | -0.886982 | -4.102259 |
| C | 4.907375  | -0.131502 | -1.775772 |
| C | 0.266391  | -2.879254 | 4.076867  |
| C | -1.648944 | -4.433760 | 3.499700  |
| C | 0.666260  | 1.238012  | -0.067298 |
| C | 1.861578  | 1.389020  | 0.712486  |
| C | 2.512197  | 2.631328  | 0.782975  |
| C | 2.052474  | 3.725855  | 0.028318  |
| C | 0.900431  | 3.590085  | -0.766954 |
| C | 0.183874  | 2.382626  | -0.785032 |
| C | -1.500636 | -0.042813 | -0.093168 |
| C | -2.240247 | -0.835410 | -1.025898 |
| C | -3.643594 | -0.873291 | -0.983682 |

|   |           |           |           |    |           |           |           |
|---|-----------|-----------|-----------|----|-----------|-----------|-----------|
| C | 4.249232  | -0.847210 | -0.046462 | C  | -4.344473 | -0.147122 | -0.002676 |
| C | 3.660620  | 0.050280  | -0.964625 | C  | -3.635244 | 0.636020  | 0.930143  |
| C | 2.294522  | 0.380013  | -0.864978 | C  | -2.233459 | 0.707923  | 0.882083  |
| S | 0.534910  | 4.902230  | 1.743814  | S  | 0.264523  | 4.918127  | -1.760655 |
| S | 1.544408  | 2.144915  | 1.900380  | S  | -1.270456 | 2.392392  | -1.794974 |
| C | 1.224605  | 3.654559  | 2.929112  | C  | -0.734605 | 3.809097  | -2.865082 |
| C | 0.223599  | 3.351462  | 4.048055  | C  | 0.105510  | 3.304500  | -4.043269 |
| C | 2.556144  | 4.170097  | 3.484375  | C  | -1.978577 | 4.563922  | -3.344251 |
| S | -3.431717 | 3.311020  | -1.891663 | S  | 3.938081  | 2.736371  | 1.839294  |
| S | -2.584626 | 0.496327  | -1.628505 | S  | 2.587940  | 0.111537  | 1.702415  |
| C | -3.269578 | 1.725692  | -2.838528 | C  | 3.470168  | 1.259637  | 2.861230  |
| C | -2.325105 | 1.891220  | -4.034080 | C  | 2.556034  | 1.663298  | 4.023147  |
| C | -4.662182 | 1.261782  | -3.278571 | C  | 4.743809  | 0.570349  | 3.361357  |
| S | 1.669046  | 1.412119  | -2.151603 | S  | -1.471221 | 1.576116  | 2.219985  |
| S | 4.548729  | 0.752900  | -2.326945 | S  | -4.436010 | 1.508063  | 2.251583  |
| C | 3.316474  | 2.100161  | -2.656623 | C  | -2.969767 | 2.574054  | 2.661875  |
| C | 3.645026  | 3.352524  | -1.835938 | C  | -2.999761 | 3.877350  | 1.854857  |
| C | 3.293159  | 2.398181  | -4.159781 | C  | -2.958460 | 2.846749  | 4.169992  |
| S | 1.252593  | -1.787070 | 2.459800  | S  | -1.498996 | -1.624458 | -2.419977 |
| S | 4.100625  | -2.511357 | 2.230587  | S  | -4.451414 | -1.810311 | -2.254404 |
| C | 2.449910  | -3.169839 | 2.767803  | C  | -2.928623 | -2.757514 | -2.751903 |
| C | 2.068553  | -4.413300 | 1.958270  | C  | -2.796811 | -4.045057 | -1.930743 |
| C | 2.495648  | -3.463182 | 4.271333  | C  | -2.991615 | -3.051429 | -4.254460 |
| C | -3.823434 | -4.345398 | 0.003354  | C  | 3.032535  | -4.948657 | -0.032662 |
| O | -4.695614 | -4.434656 | 0.845318  | O  | 4.020414  | -5.054211 | -0.820162 |
| O | -3.686355 | -5.251625 | -0.981271 | O  | 2.627172  | -5.886045 | 0.719299  |
| C | -1.907831 | 5.411860  | -0.276093 | C  | 2.789226  | 5.039140  | 0.075351  |
| O | -3.046106 | 5.669774  | -0.608774 | O  | 4.023009  | 5.013119  | 0.362465  |
| O | -0.982271 | 6.359347  | -0.035499 | O  | 2.132761  | 6.092674  | -0.177643 |
| C | 5.699281  | -1.153660 | -0.223539 | C  | -5.849340 | -0.205215 | 0.047146  |
| O | 6.286022  | -1.034557 | -1.279154 | O  | -6.415120 | 0.059725  | 1.149369  |
| O | 6.304063  | -1.558013 | 0.908286  | O  | -6.463457 | -0.516978 | -1.016170 |
| H | -4.097578 | 0.676764  | 4.556610  | H  | 4.231152  | 0.153828  | -4.445805 |
| H | -3.636154 | -1.030891 | 4.766590  | H  | 3.539296  | -1.467612 | -4.698538 |
| H | -5.316268 | -0.590795 | 4.393082  | H  | 5.256006  | -1.275890 | -4.281373 |
| H | -4.686311 | 1.573337  | 2.226487  | H  | 4.886164  | 0.917983  | -2.092216 |
| H | -5.922462 | 0.305610  | 2.067282  | H  | 5.924239  | -0.516961 | -1.916241 |
| H | -4.666093 | 0.480681  | 0.825724  | H  | 4.666457  | -0.174065 | -0.710366 |
| H | 0.185622  | -2.158738 | -4.599073 | H  | -0.414271 | -2.211553 | 4.617980  |
| H | -1.335168 | -1.995562 | -3.695452 | H  | 1.093254  | -2.282361 | 3.681779  |
| H | -1.117107 | -3.350088 | -4.824141 | H  | 0.675526  | -3.609853 | 4.784442  |
| H | 0.542559  | -5.235388 | -4.247124 | H  | -1.274447 | -5.183292 | 4.206169  |
| H | 1.438247  | -5.188542 | -2.713065 | H  | -2.186655 | -4.948808 | 2.699693  |
| H | 1.824330  | -4.041305 | -4.019073 | H  | -2.351599 | -3.791313 | 4.042691  |
| H | 0.633055  | 2.593826  | 4.725744  | H  | -0.489232 | 2.636725  | -4.677215 |
| H | -0.723842 | 2.980829  | 3.646832  | H  | 0.986518  | 2.756628  | -3.697155 |
| H | 0.022114  | 4.261944  | 4.623394  | H  | 0.443236  | 4.152890  | -4.649886 |
| H | 2.995090  | 3.428166  | 4.160478  | H  | -2.603681 | 3.913126  | -3.966109 |
| H | 2.388190  | 5.084100  | 4.064567  | H  | -1.679478 | 5.419644  | -3.960118 |
| H | 3.271058  | 4.388583  | 2.687438  | H  | -2.575150 | 4.930571  | -2.505225 |
| H | -2.227643 | 0.943436  | -4.576261 | H  | 2.265121  | 0.781041  | 4.605418  |
| H | -1.328547 | 2.212039  | -3.717768 | H  | 1.646968  | 2.152379  | 3.662100  |
| H | -2.726971 | 2.643806  | -4.721632 | H  | 3.082250  | 2.360220  | 4.685701  |
| H | -4.593830 | 0.313792  | -3.823577 | H  | 4.492276  | -0.328248 | 3.936254  |
| H | -5.100098 | 2.000549  | -3.958768 | H  | 5.293392  | 1.244223  | 4.028336  |
| H | -5.333811 | 1.133526  | -2.426312 | H  | 5.399828  | 0.287719  | 2.534296  |
| H | 4.633958  | 3.729859  | -2.119579 | H  | -3.904737 | 4.445168  | 2.101359  |
| H | 3.651028  | 3.139082  | -0.763519 | H  | -2.996765 | 3.681005  | 0.779237  |
| H | 2.904785  | 4.137601  | -2.027313 | H  | -2.125305 | 4.494330  | 2.092604  |
| H | 4.271622  | 2.775025  | -4.477148 | H  | -3.858219 | 3.404645  | 4.453039  |
| H | 2.554989  | 3.177159  | -4.381084 | H  | -2.092614 | 3.462202  | 4.439800  |
| H | 3.055630  | 1.507123  | -4.745803 | H  | -2.927762 | 1.919192  | 4.746762  |
| H | 2.806403  | -5.205569 | 2.127928  | H  | -3.665310 | -4.689043 | -2.112164 |
| H | 2.032067  | -4.199145 | 0.886764  | H  | -2.742352 | -3.832668 | -0.859447 |
| H | 1.085285  | -4.781176 | 2.272915  | H  | -1.891602 | -4.591699 | -2.219945 |
| H | 3.232023  | -4.248498 | 4.474101  | H  | -3.856435 | -3.688515 | -4.471675 |
| H | 1.521729  | -3.830543 | 4.613045  | H  | -2.094698 | -3.593763 | -4.574517 |
| H | 2.762800  | -2.575502 | 4.849488  | H  | -3.078389 | -2.133775 | -4.841231 |
| H | 7.232031  | -1.765092 | 0.683719  | Na | -8.352751 | -0.295747 | 0.128562  |
| H | -1.425793 | 7.225578  | -0.121203 | Na | 4.265398  | -7.136260 | -0.098212 |



H -4.378817 -5.926977 -0.844160

**1-CO<sub>2</sub>H-**  
Structure

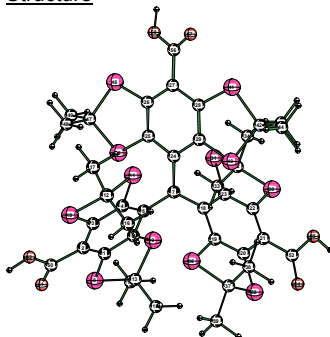

Coordinates

|   |           |           |           |
|---|-----------|-----------|-----------|
| C | -2.318085 | -2.911048 | -0.913472 |
| C | -3.453186 | -2.667946 | -0.094852 |
| C | -3.405583 | -1.546831 | 0.779332  |
| C | -2.300346 | -0.691454 | 0.782718  |
| C | -1.158080 | -0.899644 | -0.049671 |
| C | -1.219212 | -2.044364 | -0.895922 |
| C | -0.020448 | 0.019249  | -0.062040 |
| S | -2.255757 | -4.250800 | -2.084502 |
| S | 0.006569  | -2.319062 | -2.159952 |
| S | -4.683345 | -1.154897 | 1.969726  |
| S | -2.370193 | 0.678340  | 1.921200  |
| C | -3.597782 | -0.110359 | 3.048997  |
| C | -0.444067 | -4.081532 | -2.462523 |
| C | -0.213756 | -4.416602 | -3.940916 |
| C | 0.372716  | -5.008612 | -1.551769 |
| C | -2.892112 | -0.983349 | 4.094434  |
| C | -4.449099 | 0.976427  | 3.713057  |
| C | 1.342823  | -0.491961 | -0.053170 |
| C | 1.739087  | -1.616978 | 0.731275  |
| C | 3.053584  | -2.090956 | 0.752738  |
| C | 4.069175  | -1.476222 | -0.021413 |
| C | 3.698917  | -0.367984 | -0.825628 |
| C | 2.384068  | 0.105539  | -0.829204 |
| C | -0.256856 | 1.469706  | -0.044525 |
| C | -1.198592 | 2.095667  | -0.914565 |
| C | -1.437097 | 3.475227  | -0.907264 |
| C | -0.732249 | 4.324517  | -0.014758 |
| C | 0.205295  | 3.726259  | 0.864677  |
| C | 0.431422  | 2.344776  | 0.845865  |
| S | 4.820515  | 0.449970  | -1.954617 |
| S | 2.057248  | 1.476948  | -1.924677 |
| C | 3.485745  | 1.133243  | -3.042968 |
| C | 3.098305  | 0.115104  | -4.122445 |
| C | 3.970101  | 2.446693  | -3.664722 |
| S | 3.388803  | -3.454400 | 1.853772  |
| S | 0.594822  | -2.481894 | 1.794784  |
| C | 1.895830  | -3.161135 | 2.916144  |
| C | 2.223353  | -2.161502 | 4.032541  |
| C | 1.419871  | -4.498981 | 3.490972  |
| S | 1.491660  | 1.718455  | 2.132784  |
| S | 1.093466  | 4.657392  | 2.095558  |
| C | 2.343834  | 3.327631  | 2.437416  |
| C | 3.553513  | 3.483512  | 1.506338  |
| C | 2.763383  | 3.408162  | 3.909312  |
| S | -2.008425 | 1.168175  | -2.201277 |
| S | -2.612570 | 4.060288  | -2.117430 |
| C | -3.360016 | 2.398486  | -2.457155 |
| C | -4.526624 | 2.131545  | -1.497072 |
| C | -3.819800 | 2.349352  | -3.918352 |
| C | -4.624994 | -3.522782 | -0.269897 |

Na 4.013183 7.223892 0.152815

**1-CO<sub>2</sub>Na-**  
Structure

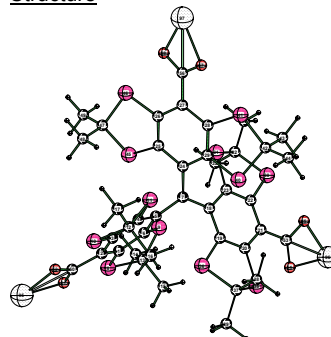

Coordinates

|   |           |           |           |
|---|-----------|-----------|-----------|
| C | -1.999987 | -3.160234 | -0.860582 |
| C | -3.138014 | -3.039004 | -0.028565 |
| C | -3.199432 | -1.915848 | 0.830295  |
| C | -2.202943 | -0.935596 | 0.813185  |
| C | -1.053556 | -1.021834 | -0.029515 |
| C | -1.004823 | -2.175171 | -0.867951 |
| C | -0.017265 | 0.012337  | -0.060251 |
| S | -1.802209 | -4.500857 | -2.023446 |
| S | 0.227909  | -2.321826 | -2.149734 |
| S | -4.507853 | -1.692537 | 2.029344  |
| S | -2.433715 | 0.432184  | 1.934655  |
| C | -3.559494 | -0.481720 | 3.073287  |
| C | -0.027274 | -4.125976 | -2.431317 |
| C | 0.220779  | -4.447022 | -3.909858 |
| C | 0.902464  | -4.946249 | -1.525588 |
| C | -2.749565 | -1.226730 | 4.143726  |
| C | -4.542585 | 0.503768  | 3.713994  |
| C | 1.393332  | -0.356057 | -0.053575 |
| C | 1.910326  | -1.422537 | 0.744634  |
| C | 3.265374  | -1.767595 | 0.754207  |
| C | 4.204814  | -1.074950 | -0.040167 |
| C | 3.720806  | -0.018276 | -0.841406 |
| C | 2.366912  | 0.329987  | -0.842053 |
| C | -0.406095 | 1.430942  | -0.050748 |
| C | -1.410129 | 1.948685  | -0.921158 |
| C | -1.798518 | 3.293596  | -0.910611 |
| C | -1.191501 | 4.219070  | -0.033115 |
| C | -0.187944 | 3.735985  | 0.835792  |
| C | 0.183539  | 2.385526  | 0.830413  |
| S | 4.774861  | 0.889659  | -1.965244 |
| S | 1.912673  | 1.663258  | -1.939529 |
| C | 3.378691  | 1.466327  | -3.045705 |
| C | 3.091037  | 0.431894  | -4.141899 |
| C | 3.740658  | 2.825921  | -3.651696 |
| S | 3.748596  | -3.067035 | 1.883878  |
| S | 0.866453  | -2.373011 | 1.841539  |
| C | 2.241252  | -2.902889 | 2.955088  |
| C | 2.477090  | -1.857821 | 4.053852  |
| C | 1.904097  | -4.270330 | 3.557991  |
| S | 1.311634  | 1.888964  | 2.119049  |
| S | 0.622656  | 4.777290  | 2.038635  |
| C | 2.000041  | 3.579867  | 2.389892  |
| C | 3.183889  | 3.835986  | 1.447333  |
| C | 2.420975  | 3.723737  | 3.856508  |
| S | -2.113778 | 0.944689  | -2.213566 |
| S | -3.033451 | 3.769668  | -2.108508 |
| C | -3.581804 | 2.031966  | -2.476315 |
| C | -4.724755 | 1.621390  | -1.537239 |
| C | -4.016371 | 1.948550  | -3.943648 |
| C | -4.269616 | -3.984115 | -0.127838 |

|   |           |           |           |
|---|-----------|-----------|-----------|
| O | -4.711189 | -4.469336 | -1.043723 |
| O | -5.708678 | -3.179418 | 0.485147  |
| C | 5.423553  | -2.024441 | 0.039475  |
| O | 5.726680  | -3.142264 | 0.434327  |
| O | 6.398224  | -1.160414 | -0.369933 |
| C | -0.932774 | 5.772042  | 0.068128  |
| O | -0.591285 | 6.487219  | 1.000830  |
| O | -1.538234 | 6.323775  | -1.022375 |
| H | 0.849863  | -4.318185 | -4.190256 |
| H | -0.790408 | -3.755385 | -4.592663 |
| H | -0.506551 | -5.454107 | -4.144172 |
| H | 1.443153  | -4.906052 | -1.766866 |
| H | 0.077861  | -6.053588 | -1.713785 |
| H | 0.215455  | -4.760284 | -0.499009 |
| H | -2.240708 | -0.364664 | 4.723429  |
| H | -2.274651 | -1.744170 | 3.609733  |
| H | -3.630350 | -1.485590 | 4.732736  |
| H | -5.209597 | 0.522268  | 4.360230  |
| H | -4.948712 | 1.599957  | 2.967272  |
| H | -3.818533 | 1.617972  | 4.340015  |
| H | 2.298603  | 0.521059  | -4.753473 |
| H | 2.736808  | -0.812269 | -3.670349 |
| H | 3.964804  | -0.118250 | -4.754436 |
| H | 3.180080  | 2.881787  | -4.288243 |
| H | 4.839600  | 2.265033  | -4.308536 |
| H | 4.247553  | 3.172217  | -2.895699 |
| H | 1.333603  | -1.972315 | 4.645459  |
| H | 2.556944  | -1.208268 | 3.613838  |
| H | 3.018952  | -2.557636 | 4.676520  |
| H | 0.527278  | -4.349578 | 4.110578  |
| H | 2.197639  | -4.935592 | 4.129671  |
| H | 1.178690  | -5.210249 | 2.696768  |
| H | 4.022952  | 4.463988  | 1.658995  |
| H | 3.254340  | 3.399396  | 0.458258  |
| H | 4.294499  | 2.701416  | 1.710504  |
| H | 3.243040  | 4.373213  | 4.114195  |
| H | 3.492387  | 2.621394  | 4.138111  |
| H | 1.903990  | 3.295586  | 4.575294  |
| H | -5.308465 | 2.890122  | -1.632201 |
| H | -4.192365 | 2.156525  | -0.456558 |
| H | -4.956503 | 1.141727  | -1.690829 |
| H | -4.604386 | 3.095296  | -4.095431 |
| H | -4.242238 | 1.363521  | -4.145989 |
| H | -2.989897 | 2.541787  | -4.603086 |
| H | -1.646189 | 7.265947  | -0.798225 |
| H | 7.222325  | -1.679218 | -0.335744 |
| H | -6.392635 | -3.828288 | 0.239184  |

**1-CO<sub>2</sub>H-a-oo-radical**  
Structure

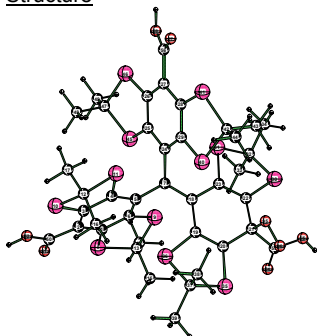

Coordinates

|   |           |           |           |
|---|-----------|-----------|-----------|
| C | -2.674272 | -2.678215 | -0.918401 |
| C | -3.657425 | -2.486811 | 0.081320  |
| C | -3.447315 | -1.494066 | 1.071118  |
| C | -2.306112 | -0.675209 | 1.013666  |

|    |           |           |           |
|----|-----------|-----------|-----------|
| O  | -4.182937 | -4.979480 | -0.930939 |
| O  | -5.324644 | -3.764882 | 0.566675  |
| C  | 5.637976  | -1.440176 | -0.032331 |
| O  | 5.976994  | -2.604101 | 0.382748  |
| O  | 6.496088  | -0.581057 | -0.441450 |
| C  | -1.592525 | 5.643592  | -0.024749 |
| O  | -1.287288 | 6.366198  | 0.987858  |
| O  | -2.232050 | 6.111302  | -1.031171 |
| H  | 1.260702  | -4.223693 | -4.179258 |
| H  | -0.441710 | -3.866104 | -4.556790 |
| H  | 0.051570  | -5.514704 | -4.100720 |
| H  | 1.952573  | -4.737024 | -1.764143 |
| H  | 0.714417  | -6.019824 | -1.662812 |
| H  | 0.740140  | -4.694873 | -0.474303 |
| H  | -2.185628 | -0.513568 | 4.758103  |
| H  | -2.035976 | -1.912789 | 3.679495  |
| H  | -3.418935 | -1.804906 | 4.794874  |
| H  | -5.239115 | -0.028399 | 4.374894  |
| H  | -5.119338 | 1.036289  | 2.953188  |
| H  | -4.003028 | 1.239603  | 4.322957  |
| H  | 2.256517  | 0.765055  | -4.771366 |
| H  | 2.820391  | -0.531201 | -3.700848 |
| H  | 3.977930  | 0.290097  | -4.773974 |
| H  | 2.919179  | 3.193451  | -4.278890 |
| H  | 4.630210  | 2.734224  | -4.288386 |
| H  | 3.942100  | 3.565411  | -2.872179 |
| H  | 1.579145  | -1.748946 | 4.674970  |
| H  | 2.706647  | -0.882890 | 3.615371  |
| H  | 3.316536  | -2.159900 | 4.694425  |
| H  | 0.997214  | -4.203392 | 4.171771  |
| H  | 2.720256  | -4.611317 | 4.208023  |
| H  | 1.742424  | -5.017665 | 2.776726  |
| H  | 3.562201  | 4.858175  | 1.584155  |
| H  | 2.884256  | 3.710909  | 0.403521  |
| H  | 3.995627  | 3.127036  | 1.651289  |
| H  | 2.812854  | 4.732001  | 4.042639  |
| H  | 3.219051  | 3.009431  | 4.094124  |
| H  | 1.578274  | 3.545587  | 4.529729  |
| H  | -5.581704 | 2.296774  | -1.664564 |
| H  | -4.403301 | 1.658011  | -0.492829 |
| H  | -5.046107 | 0.595343  | -1.754709 |
| H  | -4.877072 | 2.605706  | -4.123317 |
| H  | -4.323074 | 0.924700  | -4.190745 |
| H  | -3.204578 | 2.242696  | -4.614090 |
| Na | -6.189956 | -5.515243 | -0.349163 |
| Na | 8.022819  | -2.044385 | -0.015146 |
| Na | -2.257367 | 8.013789  | -0.014162 |

**1-CO<sub>2</sub>H-a-oo-radical**  
Structure

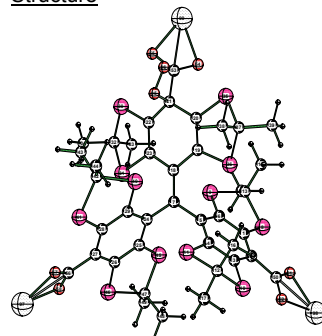

Coordinates

|   |           |           |           |
|---|-----------|-----------|-----------|
| C | -1.924758 | -3.230872 | -0.899367 |
| C | -2.962052 | -3.247516 | 0.054518  |
| C | -3.017869 | -2.218691 | 1.017849  |
| C | -2.101830 | -1.153848 | 0.977611  |

|   |           |           |           |   |           |           |           |
|---|-----------|-----------|-----------|---|-----------|-----------|-----------|
| C | -1.313776 | -0.858602 | 0.023818  | C | -1.054760 | -1.122594 | 0.028364  |
| C | -1.521754 | -1.870345 | -0.942776 | C | -0.990282 | -2.179253 | -0.913456 |
| C | -0.122079 | 0.032391  | -0.088073 | C | -0.093983 | 0.014944  | -0.066520 |
| S | -2.837376 | -3.865541 | -2.225672 | S | -1.759448 | -4.461876 | -2.173084 |
| S | -0.448281 | -2.083532 | -2.343404 | S | 0.152833  | -2.170577 | -2.278348 |
| S | -4.558956 | -1.159079 | 2.422340  | S | -4.232578 | -2.164127 | 2.319063  |
| S | -2.190698 | 0.601922  | 2.241004  | S | -2.352444 | 0.136379  | 2.172383  |
| C | -3.336859 | -0.207396 | 3.441851  | C | -3.319958 | -0.909908 | 3.346842  |
| C | -1.078101 | -3.754534 | -2.820569 | C | -0.049798 | -3.956075 | -2.706443 |
| C | -1.066337 | -3.877371 | -4.349271 | C | 0.064778  | -4.122731 | -4.226652 |
| C | -0.229833 | -4.853810 | -2.168196 | C | 1.001628  | -4.802848 | -1.976705 |
| C | -2.566253 | -1.153385 | 4.371448  | C | -2.379796 | -1.615412 | 4.333094  |
| C | -4.081324 | 0.872461  | 4.234637  | C | -4.337449 | -0.030391 | 4.081381  |
| C | 1.167747  | -0.479148 | -0.153445 | C | 1.280187  | -0.193296 | -0.084365 |
| C | 1.567428  | -1.752849 | 0.457395  | C | 1.929099  | -1.339933 | 0.563731  |
| C | 2.869193  | -2.157913 | 0.511185  | C | 3.285324  | -1.475104 | 0.620265  |
| C | 4.003040  | -1.295122 | 0.050680  | C | 4.220580  | -0.417446 | 0.135535  |
| C | 3.541832  | -0.193392 | -0.849630 | C | 3.551475  | 0.551030  | -0.779308 |
| C | 2.248920  | 0.233406  | -0.850960 | C | 2.199164  | 0.721238  | -0.777505 |
| C | -0.348756 | 1.509095  | -0.102324 | C | -0.652377 | 1.398012  | -0.118465 |
| C | -1.278215 | 2.136306  | -0.966488 | C | -1.668315 | 1.783022  | -1.025404 |
| C | -1.518510 | 3.522131  | -0.908728 | C | -2.221800 | 3.075154  | -0.997260 |
| C | -0.823469 | 4.323032  | 0.024779  | C | -1.774271 | 4.024783  | -0.060826 |
| C | 0.098630  | 3.712755  | 0.903179  | C | -0.766825 | 3.659637  | 0.851515  |
| C | 0.330533  | 2.325918  | 0.838955  | C | -0.216992 | 2.365238  | 0.826375  |
| S | 4.701293  | 0.653710  | -1.888927 | S | 4.526060  | 1.588110  | -1.837973 |
| S | 1.918738  | 1.615185  | -1.935860 | S | 1.599332  | 2.015668  | -1.857604 |
| C | 3.398034  | 1.337352  | -3.019965 | C | 3.102277  | 2.042874  | -2.937086 |
| C | 3.079569  | 0.333278  | -4.131404 | C | 2.964471  | 1.023985  | -4.074303 |
| C | 3.865366  | 2.680664  | -3.586876 | C | 3.306643  | 3.460918  | -3.478939 |
| S | 3.243964  | -3.649946 | 1.379516  | S | 3.942905  | -2.839815 | 1.537179  |
| S | 0.432767  | -2.805323 | 1.351493  | S | 1.024051  | -2.558875 | 1.512010  |
| C | 1.729321  | -3.572434 | 2.440206  | C | 2.450588  | -2.987208 | 2.621693  |
| C | 1.978040  | -2.707697 | 3.679264  | C | 2.533500  | -2.014415 | 3.801840  |
| C | 1.292654  | -4.990848 | 2.814898  | C | 2.299201  | -4.435497 | 3.092712  |
| S | 1.402448  | 1.671260  | 2.095303  | S | 0.932100  | 1.992530  | 2.131528  |
| S | 0.973347  | 4.601709  | 2.165681  | S | -0.160142 | 4.755499  | 2.114904  |
| C | 2.243846  | 3.277304  | -2.458050 | C | 1.361309  | 3.754287  | 2.492078  |
| C | 3.452671  | 3.470913  | 1.535029  | C | 2.539894  | 4.206288  | 1.620875  |
| C | 2.657845  | 3.303541  | 3.933420  | C | 1.687829  | 3.891330  | 3.983305  |
| S | -2.099332 | 1.265011  | -2.273778 | S | -2.211710 | 0.741800  | -2.354109 |
| S | -2.701651 | 4.145466  | -2.083224 | S | -3.461344 | 3.429176  | -2.224248 |
| C | -3.467063 | 2.496065  | -2.452920 | C | -3.803497 | 1.644533  | -2.622689 |
| C | -4.603669 | 2.197321  | -1.468128 | C | -4.899441 | 1.089308  | -1.703993 |
| C | -3.962683 | 2.490853  | -3.902635 | C | -4.201385 | 1.530371  | -4.097776 |
| C | -4.894524 | -3.290026 | -0.020841 | C | -4.040348 | -4.281540 | -0.009324 |
| O | -5.129788 | -4.086335 | -0.913745 | O | -3.975308 | -5.173256 | -0.916671 |
| O | -5.801187 | -3.058417 | 0.957021  | O | -4.999093 | -4.212478 | 0.825978  |
| C | 5.164883  | -2.111552 | -0.547671 | C | 5.591341  | -0.929186 | -0.379609 |
| O | 5.028395  | -3.209634 | -1.031556 | O | 5.716589  | -2.170637 | -0.584392 |
| O | 6.328125  | -1.441180 | -0.519078 | O | 6.493393  | -0.064989 | -0.550960 |
| C | -1.032331 | 5.783603  | 0.153828  | C | -2.362261 | 5.401249  | -0.037115 |
| O | -0.748224 | 6.437928  | 1.140029  | O | -2.247876 | 6.087132  | 1.028856  |
| O | -1.556271 | 6.362604  | -0.951965 | O | -2.948505 | 5.824185  | -1.084653 |
| H | -0.039043 | -3.811761 | -4.726330 | H | 1.063939  | -3.826933 | -4.568569 |
| H | -1.665352 | -3.093564 | -4.818965 | H | -0.679686 | -3.519279 | -4.751710 |
| H | -1.465914 | -4.852919 | -4.649948 | H | -0.079111 | -5.174767 | -4.501437 |
| H | 0.806049  | -4.793621 | -2.522467 | H | 2.011436  | -4.510122 | -2.289104 |
| H | -0.632133 | -5.840731 | -2.427336 | H | 0.854948  | -5.865224 | -2.209272 |
| H | -0.223761 | -4.754515 | -1.079919 | H | 0.929949  | -4.670133 | -0.894339 |
| H | -1.832944 | -0.587916 | 4.958407  | H | -1.840242 | -0.877238 | 4.938833  |
| H | -2.032684 | -1.917700 | 3.799922  | H | -1.644091 | -2.225322 | 3.801560  |
| H | -3.258588 | -1.652846 | 5.059704  | H | -2.954730 | -2.268039 | 5.001884  |
| H | -4.788035 | 0.407896  | 4.931874  | H | -4.941322 | -0.641621 | 4.763001  |
| H | -4.631107 | 1.546511  | 3.573359  | H | -5.005772 | 0.475218  | 3.379862  |
| H | -3.371411 | 1.461580  | 4.826220  | H | -3.822313 | 0.726866  | 4.684092  |
| H | 2.281683  | 0.726422  | -4.772102 | H | 2.105056  | 1.279497  | -4.705539 |
| H | 2.747386  | -0.622126 | -3.716518 | H | 2.810809  | 0.015393  | -3.680573 |
| H | 3.969751  | 0.155110  | -4.746335 | H | 3.869986  | 1.022133  | -4.693972 |
| H | 3.083830  | 3.109769  | -4.224065 | H | 2.457816  | 3.749546  | -4.109732 |

|   |           |           |           |
|---|-----------|-----------|-----------|
| H | 4.756846  | 2.537710  | -4.208392 |
| H | 4.100860  | 3.393476  | -2.792833 |
| H | 1.059787  | -2.632203 | 4.273799  |
| H | 2.292997  | -1.698291 | 3.401810  |
| H | 2.763691  | -3.155826 | 4.298796  |
| H | 0.368638  | -4.957433 | 3.403281  |
| H | 2.060827  | -5.468855 | 3.433491  |
| H | 1.121954  | -5.606685 | 1.928284  |
| H | 3.939252  | 4.429914  | 1.750748  |
| H | 3.152949  | 3.463616  | 0.483684  |
| H | 4.177115  | 2.662942  | 1.688536  |
| H | 3.126319  | 4.264891  | 4.173912  |
| H | 3.396154  | 2.518122  | 4.131518  |
| H | 1.799849  | 3.157305  | 4.594290  |
| H | -5.388155 | 2.957844  | -1.560118 |
| H | -4.244754 | 2.194872  | -0.435274 |
| H | -5.040209 | 1.215021  | -1.682339 |
| H | -4.750279 | 3.241809  | -4.033278 |
| H | -4.393676 | 1.513858  | -4.149145 |
| H | -3.152549 | 2.705682  | -4.603819 |
| O | 4.537333  | -0.565996 | 1.297297  |
| O | 5.295655  | -1.339517 | 2.043993  |
| H | -1.682201 | 7.304592  | -0.731331 |
| H | 6.985273  | -2.005844 | -0.968850 |
| H | -6.564298 | -3.631150 | 0.753646  |

**1-CO<sub>2</sub>H-b-oo-radical**  
Structure

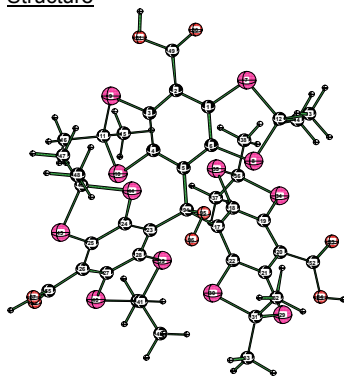

Coordinates

|   |           |           |           |
|---|-----------|-----------|-----------|
| C | 0.196224  | 3.778092  | -0.907699 |
| C | 1.288945  | 4.094263  | -0.073969 |
| C | 1.860423  | 3.071087  | 0.715824  |
| C | 1.419294  | 1.738225  | 0.586338  |
| C | 0.406915  | 1.388045  | -0.344321 |
| C | -0.217414 | 2.435571  | -1.071538 |
| S | -0.701819 | 5.016419  | -1.805617 |
| S | -1.527598 | 2.220241  | -2.269636 |
| S | 3.144536  | 3.361344  | 1.920620  |
| S | 2.225764  | 0.580963  | 1.683005  |
| C | 2.810366  | 1.835953  | 2.902793  |
| C | -2.169948 | 3.943286  | -2.167643 |
| C | -2.739604 | 4.331884  | -3.538070 |
| C | -3.226404 | 4.093899  | -1.065978 |
| C | 1.754352  | 2.102132  | 3.982245  |
| C | 4.121825  | 1.340293  | 3.524442  |
| C | -1.456362 | -0.447187 | -0.187445 |
| C | -2.193351 | 0.328937  | 0.740216  |
| C | -3.575343 | 0.110985  | 0.934030  |
| C | -4.264679 | -0.876254 | 0.203708  |
| C | -3.533584 | -1.704702 | -0.667422 |
| C | -2.143405 | -1.515058 | -0.828032 |
| C | 1.103658  | -1.124476 | -0.340181 |
| C | 2.313338  | -1.062246 | -1.089378 |
| C | 3.324250  | -2.029071 | -0.927634 |

|    |           |           |           |
|----|-----------|-----------|-----------|
| H  | 4.209713  | 3.501754  | -4.099650 |
| H  | 3.404718  | 4.188001  | -2.669032 |
| H  | 1.619442  | -2.073119 | 4.405129  |
| H  | 2.653107  | -0.984773 | 3.454896  |
| H  | 3.392645  | -2.265137 | 4.435854  |
| H  | 1.390899  | -4.544776 | 3.696832  |
| H  | 3.150981  | -4.716612 | 3.723426  |
| H  | 2.243430  | -5.127595 | 2.248276  |
| H  | 2.782857  | 5.255201  | 1.832916  |
| H  | 2.301136  | 4.113150  | 0.558135  |
| H  | 3.421922  | 3.588511  | 1.825865  |
| H  | 1.917443  | 4.936595  | 4.222722  |
| H  | 2.571663  | 3.293222  | 4.234256  |
| H  | 0.851419  | 3.564557  | 4.606384  |
| H  | -5.829019 | 1.654395  | -1.846589 |
| H  | -4.609001 | 1.163123  | -0.652413 |
| H  | -5.090587 | 0.033949  | -1.932291 |
| H  | -5.127082 | 2.088839  | -4.281531 |
| H  | -4.389020 | 0.482696  | -4.360837 |
| H  | -3.419902 | 1.923434  | -4.752985 |
| O  | 4.549317  | 0.443786  | 1.398570  |
| O  | 5.509580  | -0.063286 | 2.133177  |
| Na | -3.328010 | 7.686331  | 0.001432  |
| Na | -5.860433 | -5.968671 | -0.148045 |
| Na | 7.866852  | -1.753836 | -0.822444 |

**1-CO<sub>2</sub>Na-b-oo-radical**  
Structure

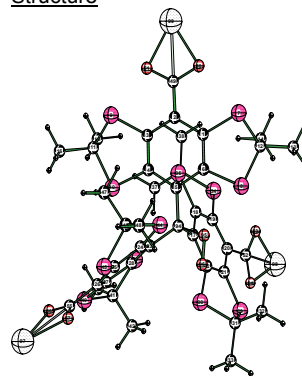

Coordinates

|   |           |           |           |
|---|-----------|-----------|-----------|
| C | 0.237410  | 3.784728  | -0.858483 |
| C | 1.314102  | 4.069522  | -0.001420 |
| C | 1.856580  | 3.025770  | 0.769857  |
| C | 1.413715  | 1.697818  | 0.603863  |
| C | 0.409282  | 1.379242  | -0.345439 |
| C | -0.191195 | 2.453410  | -1.057650 |
| S | -0.632731 | 5.058842  | -1.745482 |
| S | -1.490866 | 2.281762  | -2.278420 |
| S | 3.124434  | 3.310803  | 1.992151  |
| S | 2.212595  | 0.513882  | 1.677637  |
| C | 2.802927  | 1.742164  | 2.920756  |
| C | -2.111661 | 4.009640  | -2.135489 |
| C | -2.677117 | 4.436131  | -3.496032 |
| C | -3.170038 | 4.142396  | -1.032817 |
| C | 1.752705  | 1.967746  | 4.016255  |
| C | 4.118957  | 1.233600  | 3.522010  |
| C | -1.476126 | -0.433929 | -0.241887 |
| C | -2.210085 | 0.327929  | 0.702378  |
| C | -3.591065 | 0.108415  | 0.897230  |
| C | -4.286522 | -0.854447 | 0.151142  |
| C | -3.562600 | -1.663919 | -0.733844 |
| C | -2.173844 | -1.481528 | -0.904707 |
| C | 1.075791  | -1.137887 | -0.387766 |
| C | 2.295868  | -1.071767 | -1.118882 |
| C | 3.302101  | -2.039431 | -0.944042 |

C 3.164173 -3.073946 0.003054  
 C 2.012749 -3.100712 0.811539  
 C 0.984768 -2.146461 0.635778  
 S -4.265666 -3.039007 -1.589229  
 S -1.352660 -2.810391 -1.758680  
 C -2.839433 -3.247142 -2.752129  
 C -2.981375 -2.317525 -3.963037  
 C -2.744632 -4.716596 -3.174794  
 S -4.398481 1.145344 2.121245  
 S -1.521234 1.623959 1.774740  
 C -2.854642 1.548060 3.052184  
 C -2.553189 0.477040 4.106849  
 C -3.003050 2.933369 3.691417  
 S -0.301459 -2.237477 1.866745  
 S 1.824995 -4.269566 2.134281  
 C 0.012685 -3.986072 2.374714  
 C -0.807935 -4.967078 1.529548  
 C -0.317283 -4.128744 3.865968  
 S 2.686145 0.194935 -2.300572  
 S 4.779758 -1.828540 -1.932617  
 C 4.518299 -0.024809 -2.249500  
 C 5.158288 0.824617 -1.145787  
 C 5.090167 0.325961 -3.628347  
 C 1.809460 5.480487 -0.123366  
 O 1.312710 6.386781 -0.768433  
 O 2.949436 5.676695 0.579493  
 C -5.731915 -0.979898 0.394193  
 O -6.437303 -0.079480 0.808475  
 O -6.243499 -2.193685 0.085466  
 C 4.187839 -4.128497 0.209223  
 O 4.340269 -4.754862 1.240722  
 O 4.943560 -4.369905 -0.886255  
 H -3.600127 3.698498 -3.783542  
 H -1.990953 4.229682 -4.327528  
 H -3.090253 5.370335 -3.518475  
 H -4.092833 3.457849 -1.282081  
 H -3.564410 5.135784 -1.009064  
 H -2.827566 3.804199 -0.090529  
 H 1.535520 1.177357 4.528958  
 H 0.824585 2.467685 3.540314  
 H 2.122455 2.853061 4.691620  
 H 4.510491 2.086759 4.226882  
 H 4.880662 1.147786 2.762152  
 H 3.947049 0.416237 4.087159  
 H -2.114063 -2.423179 -4.623741  
 H -3.045666 -1.271135 -3.653341  
 H -3.888755 -2.571237 -4.523674  
 H -1.884933 -4.861820 -3.838540  
 H -3.644055 -5.004809 -3.730548  
 H -2.640724 -5.378512 -2.311183  
 H -1.624793 0.718776 4.637240  
 H -2.436472 -0.508474 3.648409  
 H -3.371025 0.426800 4.835465  
 H -2.083318 3.209087 4.220174  
 H -3.814880 2.920270 4.427852  
 H -3.221431 3.700045 2.943810  
 H -0.572181 -5.997365 1.822118  
 H -0.593803 -4.849391 0.464708  
 H -1.879998 -4.795747 1.681713  
 H -0.107152 -5.151810 4.198627  
 H -1.383020 -3.939039 4.038631  
 H 0.268758 -3.435898 4.474570  
 H 6.241608 0.655286 -1.124017  
 H 4.745616 0.577115 -0.164693  
 H 4.973608 1.888528 -1.334135  
 H 6.174204 0.163893 -3.636720  
 H 4.913104 1.384387 -3.850707  
 H 4.636947 -0.279779 -4.416734  
 C 0.000287 -0.091274 -0.633491  
 O -0.183099 -0.008145 -2.154513

C 3.135792 -3.089574 -0.028796  
 C 1.965813 -3.135932 0.743341  
 C 0.939931 -2.180708 0.565918  
 S -4.332779 -2.982064 -1.648842  
 S -1.406296 -2.765561 -1.871813  
 C -2.918928 -3.190783 -2.831498  
 C -3.072809 -2.255677 -4.037635  
 C -2.836687 -4.657513 -3.265826  
 S -4.410524 1.105643 2.124633  
 S -1.533453 1.605047 1.760699  
 C -2.855764 1.491936 3.046013  
 C -2.536813 0.397264 4.071419  
 C -2.999177 2.860062 3.722007  
 S -0.371806 -2.299203 1.770878  
 S 1.747959 -4.345802 2.031243  
 C -0.068694 -4.059360 2.239078  
 C -0.876478 -5.014474 1.351955  
 C -0.434486 -4.238538 3.717877  
 S 2.691867 0.186574 -2.322688  
 S 4.778372 -1.858019 -1.922563  
 C 4.520480 -0.052745 -2.253390  
 C 5.153308 0.802947 -1.149363  
 C 5.108057 0.290237 -3.627443  
 C 1.924195 5.437206 0.032632  
 O 1.391775 6.361075 -0.661868  
 O 2.981418 5.611267 0.721100  
 C -5.765734 -1.028090 0.317573  
 O -6.440918 -0.040361 0.749428  
 O -6.279421 -2.151801 0.014162  
 C 4.205288 -4.128502 0.132790  
 O 4.287190 -4.743770 1.243253  
 O 4.981228 -4.346343 -0.850712  
 H -3.544207 3.818066 -3.758478  
 H -1.927996 4.343742 -4.286525  
 H -3.016155 5.478316 -3.453230  
 H -4.040559 3.516186 -1.262781  
 H -3.500575 5.185743 -0.951639  
 H -2.773714 3.826954 -0.064317  
 H 1.543459 1.027662 4.541066  
 H 0.817176 2.336625 3.589042  
 H 2.118442 2.704309 4.742687  
 H 4.508679 1.962312 4.243215  
 H 4.874100 1.068720 2.749388  
 H 3.954677 0.291663 4.058607  
 H -2.217629 -2.362044 -4.714565  
 H -3.124726 -1.210752 -3.720287  
 H -3.992112 -2.499131 -4.584360  
 H -1.988789 -4.806199 -3.944490  
 H -3.747708 -4.938951 -3.806982  
 H -2.722545 -5.323682 -2.406576  
 H -1.601514 0.627289 4.595324  
 H -2.422767 -0.575399 3.585896  
 H -3.345316 0.325317 4.809523  
 H -2.073047 3.127094 4.244622  
 H -3.801801 2.827376 4.468629  
 H -3.229470 3.642949 2.994827  
 H -0.652747 -6.053958 1.623070  
 H -0.636473 -4.869902 0.295966  
 H -1.951341 -4.840257 1.481246  
 H -0.234734 -5.270329 4.031169  
 H -1.503386 -4.048550 3.871819  
 H 0.140147 -3.561977 4.355260  
 H 6.235973 0.627491 -1.113793  
 H 4.728139 0.563114 -0.171610  
 H 4.975869 1.867490 -1.343677  
 H 6.191373 0.119705 -3.624863  
 H 4.940582 1.348740 -3.858861  
 H 4.658761 -0.317533 -4.416780  
 C -0.013574 -0.087163 -0.670051  
 O -0.181639 0.031044 -2.191957

|   |           |           |           |
|---|-----------|-----------|-----------|
| O | 0.259769  | -1.019139 | -2.887435 |
| H | 5.602378  | -5.039178 | -0.621351 |
| H | -7.209018 | -2.120838 | 0.206730  |
| H | 3.184635  | 6.614495  | 0.448917  |

**1-CO<sub>2</sub>H-a-ooH**  
Structure

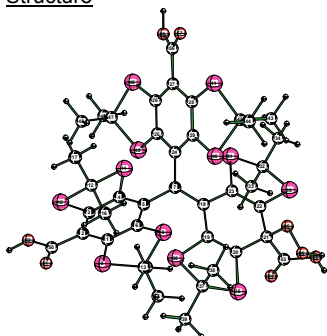

Coordinates

|   |           |           |           |
|---|-----------|-----------|-----------|
| C | -2.014238 | -3.163598 | -0.919221 |
| C | -3.052949 | -3.172330 | 0.041365  |
| C | -3.092412 | -2.146586 | 1.019094  |
| C | -2.151526 | -1.102661 | 0.981588  |
| C | -1.105199 | -1.084085 | 0.031217  |
| C | -1.056744 | -2.131562 | -0.918345 |
| C | -0.124818 | 0.038083  | -0.063633 |
| S | -1.872260 | -4.373443 | -2.208670 |
| S | 0.097961  | -2.137087 | -2.268773 |
| S | -4.289431 | -2.046517 | 2.335432  |
| S | -2.358683 | 0.184232  | 2.187638  |
| C | -3.320876 | -0.853650 | 3.373802  |
| C | -0.145131 | -3.912202 | -2.722268 |
| C | -0.025304 | -4.063790 | -4.243599 |
| C | 0.875820  | -4.795618 | -1.993708 |
| C | -2.378660 | -1.610605 | 4.318049  |
| C | -4.295967 | 0.037288  | 4.150543  |
| C | 1.244329  | -0.189731 | -0.074583 |
| C | 1.881168  | -1.345700 | 0.570241  |
| C | 3.231370  | -1.508448 | 0.626462  |
| C | 4.214236  | -0.491030 | 0.095612  |
| C | 3.521248  | 0.544276  | -0.755207 |
| C | 2.175445  | 0.722695  | -0.757123 |
| C | -0.665536 | 1.430150  | -0.118024 |
| C | -1.674103 | 1.827354  | -1.027426 |
| C | -2.232157 | 3.118931  | -0.992398 |
| C | -1.782469 | 4.057806  | -0.037053 |
| C | -0.776879 | 3.678310  | 0.879881  |
| C | -0.225665 | 2.384219  | 0.835747  |
| S | 4.515595  | 1.623258  | -1.747747 |
| S | 1.606641  | 2.033121  | -1.835710 |
| C | 3.126404  | 2.048214  | -2.902244 |
| C | 3.017800  | 1.005520  | -4.018312 |
| C | 3.332811  | 3.458499  | -3.460216 |
| S | 3.861600  | -2.921810 | 1.481393  |
| S | 0.949358  | -2.573777 | 1.485429  |
| C | 2.366859  | -3.110401 | 2.556619  |
| C | 2.487479  | -2.217840 | 3.794922  |
| C | 2.182070  | -4.582747 | 2.932336  |
| S | 0.931308  | 1.995384  | 2.126760  |
| S | -0.186433 | 4.745112  | 2.169147  |
| C | 1.341998  | 3.752782  | 2.532144  |
| C | 2.518602  | 4.239236  | 1.677338  |
| C | 1.656255  | 3.860155  | 4.028547  |
| S | -2.203835 | 0.792683  | -2.365682 |
| S | -3.473284 | 3.451869  | -2.223862 |
| C | -3.810782 | 1.670538  | -2.621881 |

|    |           |           |           |
|----|-----------|-----------|-----------|
| O  | 0.246234  | -0.974039 | -2.941815 |
| Na | 5.982690  | -5.839914 | 0.394839  |
| Na | -8.218539 | -1.307295 | 0.581880  |
| Na | 2.983959  | 7.686989  | 0.028830  |

**1-CO<sub>2</sub>Na-a-ooH**  
Structure

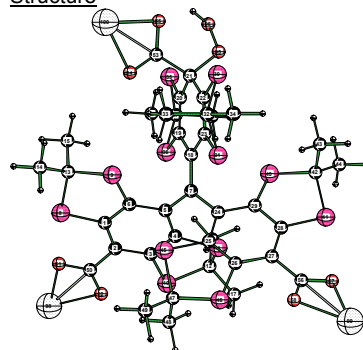

Coordinates

|   |           |           |           |
|---|-----------|-----------|-----------|
| C | -0.573467 | 3.605812  | -0.861831 |
| C | 0.346224  | 4.293324  | -0.045141 |
| C | 1.140349  | 3.553216  | 0.855525  |
| C | 1.065622  | 2.150054  | 0.887242  |
| C | 0.155497  | 1.444304  | 0.067163  |
| C | -0.651751 | 2.202284  | -0.815837 |
| C | 0.083368  | -0.047784 | 0.033226  |
| S | -1.631384 | 4.422992  | -2.036807 |
| S | -1.699015 | 1.436231  | -2.030968 |
| S | 2.288289  | 4.306692  | 1.990193  |
| S | 2.182838  | 1.334559  | 2.001237  |
| C | 2.447507  | 2.808767  | 3.082080  |
| C | -2.703309 | 2.941514  | -2.389658 |
| C | -3.084568 | 2.948092  | -3.874985 |
| C | -3.952853 | 2.966078  | -1.498286 |
| C | 1.393732  | 2.848968  | 4.196260  |
| C | 3.866073  | 2.760760  | 3.659469  |
| C | -1.125181 | -0.716075 | 0.176894  |
| C | -2.259972 | -0.180723 | 0.944260  |
| C | -3.423945 | -0.862612 | 1.125533  |
| C | -3.750610 | -2.155517 | 0.419567  |
| C | -2.551544 | -2.683228 | -0.319846 |
| C | -1.362997 | -2.040990 | -0.417879 |
| C | 1.366535  | -0.795683 | -0.134152 |
| C | 2.285441  | -0.511562 | -1.171730 |
| C | 3.532038  | -1.156813 | -1.245633 |
| C | 3.899178  | -2.112260 | -0.281558 |
| C | 2.996399  | -2.413775 | 0.755347  |
| C | 1.748566  | -1.767939 | 0.827855  |
| S | -2.768065 | -4.209487 | -1.195261 |
| S | -0.187714 | -2.828984 | -1.518519 |
| C | -1.463526 | -3.807605 | -2.450409 |
| C | -2.057595 | -2.969039 | -3.587098 |
| C | -0.822790 | -5.096809 | -2.968192 |
| S | -4.636100 | -0.187543 | 2.219876  |
| S | -2.142398 | 1.362274  | 1.855695  |
| C | -3.451611 | 0.943724  | 3.091662  |
| C | -2.845818 | 0.214898  | 4.297212  |
| C | -4.176503 | 2.224488  | 3.515547  |
| S | 0.766180  | -2.149126 | 2.262789  |
| S | 3.374029  | -3.562953 | 2.059631  |
| C | 1.616881  | -3.749339 | 2.636048  |
| C | 0.928650  | -4.907998 | 1.903548  |
| C | 1.614439  | -3.972843 | 4.152540  |
| S | 1.890197  | 0.556300  | -2.531364 |
| S | 4.568256  | -0.716915 | -2.624027 |
| C | 3.650016  | 0.852802  | -3.016260 |

|   |           |           |           |
|---|-----------|-----------|-----------|
| C | -4.895179 | 1.108272  | -1.695101 |
| C | -4.216844 | 1.558089  | -4.094950 |
| C | -4.090040 | -4.217622 | -0.088605 |
| O | -4.124560 | -5.051327 | -0.977826 |
| O | -5.057688 | -4.174560 | 0.857202  |
| C | 5.312252  | -1.187350 | -0.746251 |
| O | 5.111877  | -2.125150 | -1.476219 |
| O | 6.529634  | -0.599447 | -0.615056 |
| C | -2.331345 | 5.428213  | 0.073510  |
| O | -2.238525 | 6.133246  | 1.061675  |
| O | -2.943800 | 5.867581  | -1.051227 |
| H | 0.984429  | -3.791762 | -4.572619 |
| H | -0.748738 | -3.434781 | -4.767871 |
| H | -0.194820 | -5.108142 | -4.530901 |
| H | 1.894898  | -4.523663 | -2.292867 |
| H | 0.704676  | -5.849667 | -2.244438 |
| H | 0.796519  | -4.677526 | -0.910181 |
| H | -1.806264 | -0.900320 | 4.926138  |
| H | -1.671924 | -2.227369 | 3.756103  |
| H | -2.956204 | -2.260988 | 4.985869  |
| H | -4.900658 | -0.571092 | 4.833109  |
| H | -4.964560 | 0.580408  | 3.478230  |
| H | -3.741477 | 0.762397  | 4.757080  |
| H | 2.161966  | 1.238553  | -4.662347 |
| H | 2.877016  | 0.001359  | -3.609130 |
| H | 3.929198  | 1.007959  | -4.628197 |
| H | 2.491732  | 3.730579  | -4.107897 |
| H | 4.243554  | 3.493689  | -4.069068 |
| H | 3.414048  | 4.199570  | -2.661274 |
| H | 1.575110  | -2.291094 | 4.398749  |
| H | 2.635195  | -1.172124 | 3.513408  |
| H | 3.341623  | -2.533563 | 4.405443  |
| H | 1.276836  | -4.705297 | 3.538018  |
| H | 3.030701  | -4.926368 | 3.534914  |
| H | 2.099348  | -5.217064 | 2.046209  |
| H | 2.744793  | 5.286528  | 1.911979  |
| H | 2.289437  | 4.163938  | 0.611108  |
| H | 3.408123  | 3.630940  | 1.878054  |
| H | 1.872921  | 4.901883  | 4.292244  |
| H | 2.544989  | 3.266276  | 4.271156  |
| H | 0.820108  | 3.510353  | 4.639076  |
| H | -5.829808 | 1.665288  | -1.831499 |
| H | -4.599103 | 1.182414  | -0.645159 |
| H | -5.078933 | 0.052798  | -1.926471 |
| H | -5.149330 | 2.106686  | -4.270819 |
| H | -4.396413 | 0.508953  | -4.355882 |
| H | -3.443900 | 1.958496  | -4.755556 |
| O | 4.789111  | 0.329861  | 1.148626  |
| O | 5.717197  | -0.435032 | 1.961123  |
| H | -3.292029 | 6.754280  | -0.840878 |
| H | 7.119985  | -1.061996 | -1.240663 |
| H | -5.676919 | -4.895247 | 0.636408  |
| H | 6.543370  | -0.271480 | 1.465127  |

**1-CO<sub>2</sub>H-b-ooH**  
Structure

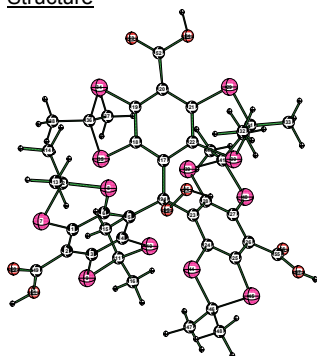

|    |           |           |           |
|----|-----------|-----------|-----------|
| C  | 4.233539  | 2.029643  | -2.224191 |
| C  | 3.719191  | 1.106558  | -4.525638 |
| C  | 0.543784  | 5.767759  | -0.195244 |
| O  | -0.192736 | 6.401956  | -1.017386 |
| O  | 1.466310  | 6.327148  | 0.482260  |
| C  | -4.888814 | -1.926416 | -0.650743 |
| O  | -4.683942 | -1.056793 | -1.534262 |
| O  | -5.926472 | -2.666297 | -0.596627 |
| C  | 5.229553  | -2.794134 | -0.355803 |
| O  | 5.699979  | -3.318958 | 0.702568  |
| O  | 5.831006  | -2.816463 | -1.477976 |
| H  | -3.708614 | 2.076707  | -4.109941 |
| H  | -2.198941 | 2.927799  | -4.514692 |
| H  | -3.667906 | 3.846561  | -4.111106 |
| H  | -4.571635 | 2.081262  | -1.692146 |
| H  | -4.542064 | 3.870434  | -1.698585 |
| H  | -3.677441 | 2.956129  | -0.440648 |
| H  | 1.477849  | 1.958706  | 4.831216  |
| H  | 0.384428  | 2.875194  | 3.776489  |
| H  | 1.535369  | 3.741604  | 4.818327  |
| H  | 4.051384  | 3.648142  | 4.276831  |
| H  | 4.617000  | 2.723097  | 2.866272  |
| H  | 3.987592  | 1.879679  | 4.300633  |
| H  | -1.266780 | -2.662924 | -4.282050 |
| H  | -2.543161 | -2.070739 | -3.195033 |
| H  | -2.800616 | -3.560523 | -4.139259 |
| H  | -0.019594 | -4.860239 | -3.675624 |
| H  | -1.566228 | -5.702154 | -3.500578 |
| H  | -0.405345 | -5.691108 | -2.151423 |
| H  | -2.118395 | 0.863504  | 4.800200  |
| H  | -2.333361 | -0.698433 | 3.984070  |
| H  | -3.632192 | -0.056548 | 5.012080  |
| H  | -3.477977 | 2.905879  | 4.015230  |
| H  | -4.975051 | 1.988802  | 4.229052  |
| H  | -4.612693 | 2.739376  | 2.655967  |
| H  | 1.453557  | -5.848582 | 2.113425  |
| H  | 0.926508  | -4.743953 | 0.822895  |
| H  | -0.112058 | -5.003601 | 2.234783  |
| H  | 2.139424  | -4.904494 | 4.395785  |
| H  | 0.586131  | -4.068079 | 4.520817  |
| H  | 2.102410  | -3.148319 | 4.678228  |
| H  | 5.285827  | 2.179977  | -2.496257 |
| H  | 4.178290  | 1.846610  | -1.147790 |
| H  | 3.678196  | 2.949553  | -2.443038 |
| H  | 4.761099  | 1.253293  | -4.834784 |
| H  | 3.165973  | 2.017126  | -4.784548 |
| H  | 3.301835  | 0.268478  | -5.089636 |
| O  | -4.075829 | -3.241890 | 1.309261  |
| O  | -5.377252 | -3.043302 | 1.920095  |
| H  | -5.933414 | -3.168073 | 1.112770  |
| Na | 0.915695  | 8.206995  | -0.468341 |
| Na | 7.437922  | -3.912265 | -0.489996 |
| Na | -6.514897 | -1.774859 | -2.520044 |

**1-CO<sub>2</sub>Na-b-ooH**  
Structure

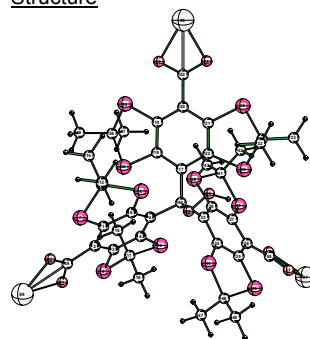



## Coordinates

|   |           |           |           |
|---|-----------|-----------|-----------|
| C | 3.434229  | -1.862036 | -0.901073 |
| C | 3.296868  | -2.945626 | -0.008562 |
| C | 2.113651  | -3.051046 | 0.757340  |
| C | 1.053115  | -2.134071 | 0.575894  |
| C | 1.162490  | -1.062569 | -0.346913 |
| C | 2.368881  | -0.954965 | -1.094754 |
| S | 4.908325  | -1.591399 | -1.850334 |
| S | 2.656795  | 0.255196  | -2.369675 |
| S | 1.854393  | -4.323743 | 1.980365  |
| S | -0.384922 | -2.480802 | 1.576111  |
| C | 0.508265  | -3.433722 | 2.872395  |
| C | 4.495744  | 0.142648  | -2.358813 |
| C | 5.002856  | 0.370961  | -3.789656 |
| C | 5.126333  | 1.148263  | -1.387584 |
| C | 1.086360  | -2.500215 | 3.942910  |
| C | -0.453958 | -4.457756 | 3.485300  |
| C | 0.251246  | 1.437208  | -0.293128 |
| C | 1.349289  | 1.861707  | 0.493725  |
| C | 1.652311  | 3.234037  | 0.628095  |
| C | 0.850455  | 4.216509  | 0.018450  |
| C | -0.325848 | 3.813128  | -0.643230 |
| C | -0.634373 | 2.443348  | -0.764574 |
| C | -1.427170 | -0.537495 | -0.292881 |
| C | -2.066158 | -1.504561 | -1.116082 |
| C | -3.403071 | -1.886632 | -0.883961 |
| C | -4.125216 | -1.335454 | 0.194101  |
| C | -3.470740 | -0.460215 | 1.080425  |
| C | -2.139397 | -0.056251 | 0.837955  |
| S | -1.497889 | 4.964923  | -1.330328 |
| S | -2.296144 | 2.148784  | -1.391349 |
| C | -2.400223 | 3.718864  | -2.356901 |
| C | -1.754861 | 3.587609  | -3.741599 |
| C | -3.872437 | 4.132464  | -2.463557 |
| S | 3.078580  | 3.653453  | 1.603465  |
| S | 2.411791  | 0.789292  | 1.455932  |
| C | 3.012774  | 2.106432  | 2.610109  |
| C | 2.063392  | 2.269237  | 3.803122  |
| C | 4.428358  | 1.743612  | 3.072091  |
| S | -1.425470 | 0.913304  | 2.149180  |
| S | -4.244930 | 0.122655  | 2.566677  |
| C | -3.014654 | 1.461953  | 2.916152  |
| C | -3.485995 | 2.799078  | 2.332872  |
| C | -2.812459 | 1.561354  | 4.433993  |
| S | -1.292991 | -2.319708 | -2.510537 |
| S | -4.084379 | -3.097391 | -1.996420 |
| C | -2.445852 | -3.766511 | -2.522656 |
| C | -1.963343 | -4.859803 | -1.561925 |
| C | -2.557006 | -4.293062 | -3.958043 |
| C | 4.380864  | -3.956392 | 0.008352  |
| O | 5.400406  | -3.889476 | -0.655596 |
| O | 4.146355  | -5.026043 | 0.802999  |
| C | 1.294143  | 5.628284  | 0.117713  |
| O | 2.445191  | 5.974775  | 0.303009  |
| O | 0.292138  | 6.530821  | 0.005376  |
| C | -5.541454 | -1.679649 | 0.471094  |
| O | -6.068268 | -1.620306 | 1.565971  |
| O | -6.235288 | -2.044419 | -0.631565 |
| H | 4.759934  | 1.388319  | -4.118454 |
| H | 4.559355  | -0.339848 | -4.491095 |
| H | 6.093564  | 0.265317  | -3.824440 |
| H | 4.871315  | 2.172555  | -1.684210 |
| H | 6.218379  | 1.044467  | -1.393694 |
| H | 4.765957  | 0.990726  | -0.368694 |
| H | 0.276638  | -1.959938 | 4.446984  |
| H | 1.762589  | -1.764971 | 3.498671  |
| H | 1.642089  | -3.081346 | 4.688434  |
| H | 0.065050  | -5.051440 | 4.246674  |
| H | -0.855894 | -5.134416 | 2.727045  |
| H | -1.287983 | -3.944547 | 3.977249  |

## Coordinates

|   |           |           |           |
|---|-----------|-----------|-----------|
| C | 3.457104  | -1.847327 | -0.865925 |
| C | 3.310459  | -2.922500 | 0.027443  |
| C | 2.117803  | -3.029708 | 0.765615  |
| C | 1.048497  | -2.128438 | 0.560504  |
| C | 1.169858  | -1.057238 | -0.360112 |
| C | 2.391809  | -0.949126 | -1.086396 |
| S | 4.953292  | -1.575383 | -1.790564 |
| S | 2.695285  | 0.253043  | -2.369610 |
| S | 1.877892  | -4.311732 | 1.982338  |
| S | -0.407876 | -2.504758 | 1.523617  |
| C | 0.469982  | -3.459805 | 2.827976  |
| C | 4.534068  | 0.152536  | -2.318185 |
| C | 5.069321  | 0.380772  | -3.738572 |
| C | 5.133395  | 1.171422  | -1.340321 |
| C | 0.985328  | -2.526150 | 3.931396  |
| C | -0.488308 | -4.512132 | 3.397306  |
| C | 0.256960  | 1.438402  | -0.314130 |
| C | 1.344062  | 1.865811  | 0.488531  |
| C | 1.633995  | 3.238886  | 0.637637  |
| C | 0.841222  | 4.218771  | 0.024641  |
| C | -0.319071 | 3.813112  | -0.650863 |
| C | -0.624871 | 2.446075  | -0.789373 |
| C | -1.418391 | -0.536911 | -0.347215 |
| C | -2.049933 | -1.495346 | -1.185841 |
| C | -3.385129 | -1.883915 | -0.959629 |
| C | -4.114823 | -1.362622 | 0.120203  |
| C | -3.475778 | -0.485744 | 1.008313  |
| C | -2.147448 | -0.067219 | 0.779741  |
| S | -1.472693 | 4.990223  | -1.326896 |
| S | -2.279713 | 2.161258  | -1.442704 |
| C | -2.372549 | 3.753058  | -2.374555 |
| C | -1.722252 | 3.638541  | -3.758944 |
| C | -3.843667 | 4.168538  | -2.484733 |
| S | 3.035043  | 3.669009  | 1.651415  |
| S | 2.401745  | 0.793205  | 1.460252  |
| C | 2.969618  | 2.106078  | 2.635177  |
| C | 2.000133  | 2.242591  | 3.815817  |
| C | 4.380644  | 1.751517  | 3.117113  |
| S | -1.455807 | 0.906502  | 2.103098  |
| S | -4.275798 | 0.089524  | 2.490098  |
| C | -3.059867 | 1.440524  | 2.847758  |
| C | -3.532512 | 2.772656  | 2.253132  |
| C | -2.874992 | 1.550983  | 4.366943  |
| S | -1.277610 | -2.289568 | -2.593295 |
| S | -4.086294 | -3.064315 | -2.092948 |
| C | -2.447528 | -3.722360 | -2.640997 |
| C | -1.966072 | -4.843763 | -1.711380 |
| C | -2.560920 | -4.212708 | -4.088809 |
| C | 4.359646  | -3.988504 | 0.117493  |
| O | 5.429091  | -3.851043 | -0.558205 |
| O | 4.125762  | -5.011903 | 0.838315  |
| C | 1.206278  | 5.668214  | 0.126551  |
| O | 2.428743  | 5.966314  | 0.310242  |
| O | 0.278607  | 6.532789  | 0.019752  |
| C | -5.546057 | -1.759352 | 0.329116  |
| O | -6.015060 | -1.726734 | 1.511032  |
| O | -6.225067 | -2.105488 | -0.688599 |
| H | 4.822212  | 1.393661  | -4.079140 |
| H | 4.647717  | -0.338652 | -4.444937 |
| H | 6.162107  | 0.286486  | -3.750408 |
| H | 4.849933  | 2.190503  | -1.630278 |
| H | 6.228620  | 1.097831  | -1.341743 |
| H | 4.772456  | 0.997683  | -0.324250 |
| H | 0.148339  | -2.002731 | 4.408824  |
| H | 1.666373  | -1.775637 | 3.520752  |
| H | 1.522465  | -3.104750 | 4.693393  |
| H | 0.024085  | -5.113613 | 4.157898  |
| H | -0.857255 | -5.179578 | 2.614292  |
| H | -1.345117 | -4.026925 | 3.879660  |



|   |           |           |           |
|---|-----------|-----------|-----------|
| H | -2.294343 | 2.844614  | -4.342303 |
| H | -0.708214 | 3.282291  | -3.667938 |
| H | -1.800575 | 4.549409  | -4.265438 |
| H | -4.432022 | 3.389996  | -3.043878 |
| H | -3.954358 | 5.091068  | -2.988418 |
| H | -4.335678 | 4.232217  | -1.478785 |
| H | 2.010310  | 1.335747  | 4.375676  |
| H | 1.053310  | 2.525423  | 3.472323  |
| H | 2.423888  | 3.066107  | 4.464495  |
| H | 4.416457  | 0.798688  | 3.627307  |
| H | 4.811718  | 2.518009  | 3.746519  |
| H | 5.114435  | 1.644463  | 2.227330  |
| H | -4.442831 | 3.085742  | 2.785850  |
| H | -3.617401 | 2.734217  | 1.250461  |
| H | -2.751045 | 3.585253  | 2.542457  |
| H | -3.751247 | 1.855170  | 4.917656  |
| H | -2.067243 | 2.330592  | 4.667975  |
| H | -2.482997 | 0.609584  | 4.857611  |
| H | -2.664566 | -5.702980 | -1.564756 |
| H | -1.875784 | -4.481186 | -0.539948 |
| H | -0.977382 | -5.223157 | -1.874588 |
| H | -3.255808 | -5.136718 | -3.998303 |
| H | -1.581406 | -4.656424 | -4.300622 |
| H | -2.902771 | -3.516983 | -4.645609 |
| C | 0.000908  | -0.051225 | -0.682619 |
| O | 0.120652  | -0.217586 | -2.153004 |
| O | -0.256664 | 0.856415  | -3.025736 |
| H | -7.127673 | -2.290685 | -0.323011 |
| H | 0.713580  | 7.410380  | 0.037915  |
| H | 4.921315  | -5.609420 | 0.697979  |
| H | -1.229294 | 0.752609  | -3.064910 |

|    |           |           |           |
|----|-----------|-----------|-----------|
| H  | -2.262319 | 2.909594  | -4.376768 |
| H  | -0.678792 | 3.322244  | -3.682721 |
| H  | -1.754715 | 4.610111  | -4.266597 |
| H  | -4.404039 | 3.436218  | -3.077819 |
| H  | -3.921317 | 5.136048  | -2.994782 |
| H  | -4.310156 | 4.255254  | -1.500058 |
| H  | 1.936745  | 1.297128  | 4.367815  |
| H  | 0.996144  | 2.503927  | 3.470978  |
| H  | 2.347152  | 3.026885  | 4.500096  |
| H  | 4.366347  | 0.810251  | 3.679076  |
| H  | 4.754950  | 2.532713  | 3.789692  |
| H  | 5.075411  | 1.648124  | 2.279808  |
| H  | -4.494793 | 3.058294  | 2.696749  |
| H  | -3.654859 | 2.698720  | 1.170253  |
| H  | -2.802433 | 3.564503  | 2.459624  |
| H  | -3.821664 | 1.839223  | 4.839643  |
| H  | -2.138007 | 2.327098  | 4.605837  |
| H  | -2.542175 | 0.603666  | 4.798124  |
| H  | -2.685419 | -5.672336 | -1.712958 |
| H  | -1.849547 | -4.484123 | -0.685310 |
| H  | -0.993790 | -5.222492 | -2.049302 |
| H  | -3.257228 | -5.058021 | -4.148371 |
| H  | -1.585762 | -4.562305 | -4.447932 |
| H  | -2.914663 | -3.420048 | -4.753310 |
| C  | 0.013973  | -0.047587 | -0.713799 |
| O  | 0.157116  | -0.209478 | -2.183202 |
| O  | -0.222621 | 0.862606  | -3.059590 |
| Na | -7.909131 | -2.435008 | 0.668685  |
| Na | 1.818153  | 8.068651  | 0.278166  |
| Na | 6.065278  | -5.796418 | 0.204147  |
| H  | -1.200275 | 0.796759  | -3.053344 |

**CPh<sub>3</sub>**  
Structure

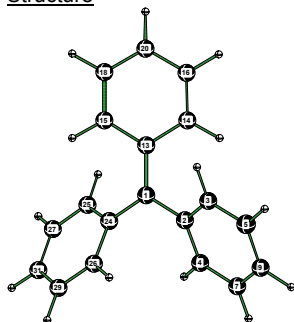

Coordinates

|   |           |           |           |
|---|-----------|-----------|-----------|
| C | -0.001266 | -0.004788 | 0.000316  |
| C | 1.207673  | -0.831123 | 0.003163  |
| C | 2.384489  | -0.413313 | 0.670744  |
| C | 1.251999  | -2.078767 | -0.665089 |
| C | 3.532107  | -1.199551 | 0.673622  |
| H | 2.379325  | 0.529148  | 1.208949  |
| C | 2.404157  | -2.858393 | -0.665669 |
| H | 0.375071  | -2.418525 | -1.206795 |
| C | 3.552214  | -2.426948 | 0.004980  |
| H | 4.414481  | -0.856289 | 1.207775  |
| H | 2.409450  | -3.805011 | -1.200098 |
| H | 4.450297  | -3.038562 | 0.006212  |
| C | 0.113505  | 1.456745  | -0.000314 |
| C | 1.158339  | 2.113142  | -0.693560 |
| C | -0.815036 | 2.269700  | 0.692618  |
| C | 1.263999  | 3.500441  | -0.696037 |
| H | 1.876404  | 1.519233  | -1.250025 |
| C | -0.701460 | 3.656406  | 0.693884  |
| H | -1.617000 | 1.796588  | 1.250295  |
| C | 0.336884  | 4.282553  | -0.001426 |
| H | 2.069783  | 3.975286  | -1.250067 |

**CPh<sub>3</sub>-H**  
Structure

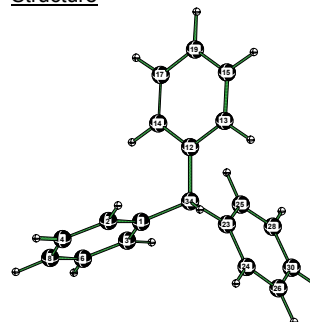

Coordinates

|   |           |           |           |
|---|-----------|-----------|-----------|
| C | 1.281540  | -0.732472 | -0.324454 |
| C | 2.442148  | -0.557084 | -1.092793 |
| C | 1.350790  | -1.556367 | 0.805109  |
| C | 3.637217  | -1.183830 | -0.744286 |
| H | 2.405904  | 0.081224  | -1.973225 |
| C | 2.548291  | -2.183641 | 1.159554  |
| H | 0.461577  | -1.718843 | 1.406729  |
| C | 3.694898  | -2.001079 | 0.387289  |
| H | 4.522616  | -1.037424 | -1.357727 |
| H | 2.579498  | -2.820884 | 2.039713  |
| H | 4.624461  | -2.493450 | 0.660399  |
| C | -0.007228 | 1.473690  | -0.323263 |
| C | -0.747450 | 2.390912  | -1.083716 |
| C | 0.679357  | 1.944434  | 0.802314  |
| C | -0.802875 | 3.738351  | -0.731175 |
| H | -1.288207 | 2.041122  | -1.960706 |
| C | 0.622882  | 3.293820  | 1.160878  |
| H | 1.271625  | 1.255224  | 1.396658  |
| C | -0.116740 | 4.195679  | 0.396413  |
| H | -1.378895 | 4.431932  | -1.338472 |
| H | 1.164867  | 3.638789  | 2.037802  |

|   |           |           |           |
|---|-----------|-----------|-----------|
| H | -1.422571 | 4.252315  | 1.247588  |
| H | 0.422558  | 5.365766  | -0.001913 |
| C | -1.323277 | -0.633766 | -0.002635 |
| C | -2.423601 | -0.034739 | -0.662991 |
| C | -1.558325 | -1.863895 | 0.658607  |
| C | -3.679181 | -0.633538 | -0.665218 |
| H | -2.274514 | 0.898756  | -1.196073 |
| C | -2.817130 | -2.455951 | 0.658944  |
| H | -0.742999 | -2.338599 | 1.194951  |
| C | -3.886876 | -1.847425 | -0.003933 |
| H | -4.499519 | -0.154419 | -1.193641 |
| H | -2.967197 | -3.393882 | 1.187614  |
| H | -4.868862 | -2.312537 | -0.004804 |

**CPh<sub>3</sub><sup>+</sup>**  
Structure

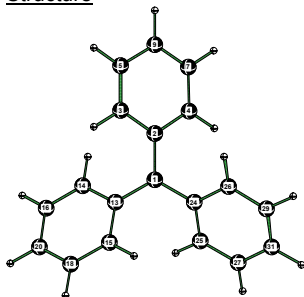

Coordinates

|   |           |           |           |
|---|-----------|-----------|-----------|
| C | -0.000545 | -0.000989 | -0.001810 |
| C | -0.253426 | 1.426358  | -0.000373 |
| C | -1.379768 | 1.964306  | 0.677453  |
| C | 0.620057  | 2.318139  | -0.677922 |
| C | -1.609073 | 3.332706  | 0.685926  |
| H | -2.031507 | 1.302791  | 1.237557  |
| C | 0.364615  | 3.681904  | -0.688422 |
| H | 1.460924  | 1.920646  | -1.235598 |
| C | -0.743920 | 4.192062  | -0.002053 |
| H | -2.456071 | 3.735842  | 1.231931  |
| H | 1.021979  | 4.351178  | -1.234301 |
| H | -0.933579 | 5.261463  | -0.002657 |
| C | -1.109411 | -0.934146 | -0.001746 |
| C | -2.323925 | -0.618965 | -0.667697 |
| C | -1.006914 | -2.183807 | 0.665839  |
| C | -3.378059 | -1.521035 | -0.674700 |
| H | -2.403530 | 0.310386  | -1.220774 |
| C | -2.077217 | -3.066629 | 0.676333  |
| H | -0.104334 | -2.421224 | 1.218057  |
| C | -3.260184 | -2.741166 | 0.001798  |
| H | -4.290835 | -1.282206 | -1.211208 |
| H | -1.998303 | -4.006031 | 1.214229  |
| H | -4.091716 | -3.439839 | 0.003150  |
| C | 1.362641  | -0.493890 | -0.000989 |
| C | 1.701531  | -1.694322 | -0.680315 |
| C | 2.389265  | 0.213311  | 0.679605  |
| C | 3.010719  | -2.153844 | -0.687415 |
| H | 0.939303  | -2.222896 | -1.242194 |
| C | 3.689334  | -0.271345 | 0.691643  |
| H | 2.139959  | 1.108530  | 1.238674  |
| C | 4.003971  | -1.449409 | 0.003585  |
| H | 3.264265  | -3.056301 | -1.234531 |
| H | 4.460008  | 0.261062  | 1.239951  |
| H | 5.025297  | -1.818835 | 0.005277  |

|   |           |           |           |
|---|-----------|-----------|-----------|
| H | -0.155629 | 5.246051  | 0.672657  |
| C | -1.273585 | -0.742749 | -0.322533 |
| C | -1.728874 | -1.810715 | -1.109113 |
| C | -1.995655 | -0.411584 | 0.830625  |
| C | -2.869227 | -2.530319 | -0.755039 |
| H | -1.179265 | -2.081987 | -2.008120 |
| C | -3.136889 | -1.132683 | 1.190521  |
| H | -1.671680 | 0.423133  | 1.445109  |
| C | -3.578617 | -2.193578 | 0.399922  |
| H | -3.205885 | -3.351335 | -1.382932 |
| H | -3.683740 | -0.857958 | 2.088970  |
| H | -4.469743 | -2.750333 | 0.677419  |
| C | 0.000417  | -0.001323 | -0.740510 |
| H | 0.000089  | -0.002040 | -1.838732 |

**CPh<sub>3</sub><sup>-</sup>**  
Structure

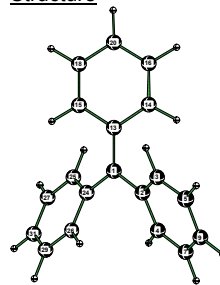

Coordinates

|   |           |           |           |
|---|-----------|-----------|-----------|
| C | 0.000501  | -0.001896 | -0.001720 |
| C | 1.325297  | -0.611424 | -0.000339 |
| C | 2.454464  | 0.003587  | 0.616856  |
| C | 1.595521  | -1.868719 | -0.617058 |
| C | 3.718130  | -0.575620 | 0.611846  |
| H | 2.314248  | 0.954914  | 1.122085  |
| C | 2.858184  | -2.450161 | -0.609599 |
| H | 0.783362  | -2.382009 | -1.123803 |
| C | 3.946298  | -1.815394 | 0.002013  |
| H | 4.538265  | -0.057756 | 1.109931  |
| H | 3.000415  | -3.409978 | -1.107002 |
| H | 4.934847  | -2.269671 | 0.003225  |
| C | -0.133069 | 1.450795  | -0.000876 |
| C | 0.820733  | 2.311860  | -0.619238 |
| C | -1.228011 | 2.121971  | 0.618849  |
| C | 0.694236  | 3.696265  | -0.612123 |
| H | 1.670236  | 1.863853  | -1.126796 |
| C | -1.357449 | 3.506092  | 0.613109  |
| H | -1.981040 | 1.525168  | 1.125516  |
| C | -0.398297 | 4.322118  | 0.000768  |
| H | 1.453725  | 4.298727  | -1.111175 |
| H | -2.214587 | 3.958622  | 1.112473  |
| H | -0.498528 | 5.405449  | 0.001081  |
| C | -1.190927 | -0.842689 | -0.002083 |
| C | -2.414514 | -0.443550 | -0.616881 |
| C | -1.226800 | -2.128281 | 0.614654  |
| C | -3.551708 | -1.243017 | -0.609507 |
| H | -2.450786 | 0.517461  | -1.121889 |
| C | -2.362646 | -2.929679 | 0.609600  |
| H | -0.334260 | -2.485042 | 1.120527  |
| C | -3.549359 | -2.503547 | 0.000490  |
| H | -4.453453 | -0.882936 | -1.105580 |
| H | -2.327066 | -3.899140 | 1.107375  |
| H | -4.438877 | -3.129937 | 0.001473  |

**CPh<sub>3</sub>-a-oo-radical**  
Structure

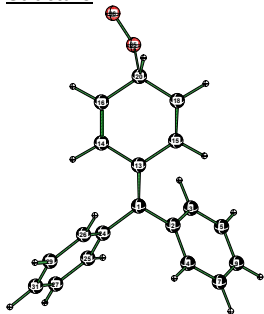

Coordinates

|   |           |           |           |
|---|-----------|-----------|-----------|
| C | 0.546899  | 0.003617  | -0.086012 |
| C | 1.347299  | -1.250016 | -0.049642 |
| C | 0.989224  | -2.324422 | 0.785491  |
| C | 2.516793  | -1.371788 | -0.823669 |
| C | 1.759384  | -3.486613 | 0.827421  |
| H | 0.111831  | -2.233424 | 1.418958  |
| C | 3.278783  | -2.537140 | -0.789972 |
| H | 2.817884  | -0.546964 | -1.462852 |
| C | 2.903214  | -3.599838 | 0.035882  |
| H | 1.468346  | -4.300389 | 1.486275  |
| H | 4.169648  | -2.615545 | -1.407454 |
| H | 3.502862  | -4.505464 | 0.068024  |
| C | -0.824781 | -0.003919 | -0.217949 |
| C | -1.643708 | 1.184483  | 0.026577  |
| C | -1.566432 | -1.203630 | -0.609107 |
| C | -2.983735 | 1.179607  | -0.086374 |
| H | -1.144065 | 2.088430  | 0.357089  |
| C | -2.903681 | -1.221183 | -0.756619 |
| H | -0.998221 | -2.095239 | -0.850635 |
| C | -3.756837 | -0.030139 | -0.487238 |
| H | -3.566659 | 2.065283  | 0.151576  |
| H | -3.406974 | -2.122263 | -1.096851 |
| H | -4.462232 | 0.174889  | -1.300791 |
| C | 1.325909  | 1.266256  | 0.032330  |
| C | 2.317832  | 1.402811  | 1.021471  |
| C | 1.129471  | 2.334295  | -0.862415 |
| C | 3.061448  | 2.575473  | 1.131764  |
| H | 2.493761  | 0.583770  | 1.712657  |
| C | 1.882500  | 3.503593  | -0.758775 |
| H | 0.393516  | 2.233583  | -1.654778 |
| C | 2.847263  | 3.630950  | 0.241765  |
| H | 3.811900  | 2.665038  | 1.912685  |
| H | 1.719503  | 4.312314  | -1.466233 |
| H | 3.433473  | 4.542241  | 0.323310  |
| O | -4.683629 | -0.400099 | 0.657529  |
| O | -5.779576 | 0.330019  | 0.637402  |

**CPh<sub>3</sub>-a-ooH**  
Structure

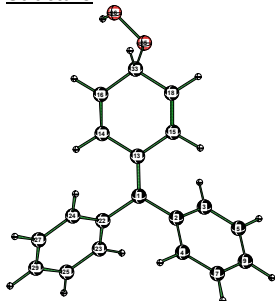

**CPh<sub>3</sub>-b-oo-radical**  
Structure

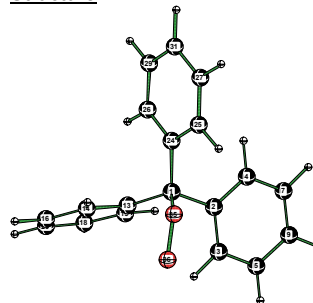

Coordinates

|   |           |           |           |
|---|-----------|-----------|-----------|
| C | 0.018501  | 0.006047  | 0.480921  |
| C | 1.318274  | -0.676456 | 0.042337  |
| C | 1.545925  | -2.023909 | 0.374591  |
| C | 2.302491  | 0.007088  | -0.682786 |
| C | 2.732072  | -2.655716 | 0.007741  |
| H | 0.793817  | -2.570559 | 0.930267  |
| C | 3.486398  | -0.631901 | -1.059349 |
| H | 2.149281  | 1.043238  | -0.961011 |
| C | 3.708198  | -1.962845 | -0.712207 |
| H | 2.890901  | -3.695326 | 0.281824  |
| H | 4.234218  | -0.081502 | -1.624022 |
| H | 4.630630  | -2.459062 | -1.002146 |
| C | -1.249844 | -0.730896 | 0.051430  |
| C | -2.452068 | -0.503144 | 0.739376  |
| C | -1.265454 | -1.568732 | -1.069203 |
| C | -3.632305 | -1.117284 | 0.328273  |
| H | -2.461041 | 0.153614  | 1.602987  |
| C | -2.452910 | -2.175125 | -1.488458 |
| H | -0.349051 | -1.751018 | -1.620163 |
| C | -3.637915 | -1.956795 | -0.788727 |
| H | -4.550791 | -0.937657 | 0.880589  |
| H | -2.443833 | -2.822591 | -2.361225 |
| H | -4.559913 | -2.434025 | -1.109823 |
| C | -0.038051 | 1.495960  | 0.128280  |
| C | 0.660006  | 2.433298  | 0.906831  |
| C | -0.745986 | 1.947150  | -0.992408 |
| C | 0.636518  | 3.787822  | 0.576226  |
| H | 1.218213  | 2.102278  | 1.775311  |
| C | -0.758094 | 3.301962  | -1.328488 |
| H | -1.293194 | 1.239004  | -1.605544 |
| C | -0.071104 | 4.227838  | -0.543693 |
| H | 1.175534  | 4.499484  | 1.195926  |
| H | -1.312587 | 3.631297  | -2.203182 |
| H | -0.086422 | 5.283303  | -0.801924 |
| O | 0.033305  | 0.057610  | 2.009742  |
| O | -0.116265 | -1.110941 | 2.590011  |

**CPh<sub>3</sub>-b-ooH**  
Structure

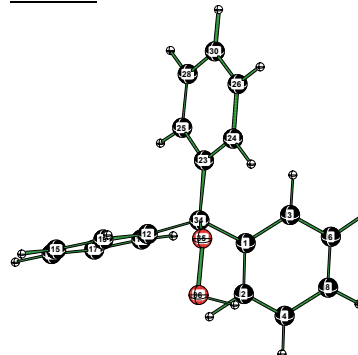

Coordinates

|   |           |           |           |
|---|-----------|-----------|-----------|
| C | 0.585160  | 0.000534  | -0.077922 |
| C | 1.427916  | -1.226566 | -0.044191 |
| C | 1.122846  | -2.303353 | 0.808387  |
| C | 2.586793  | -1.317864 | -0.837837 |
| C | 1.932846  | -3.438377 | 0.848677  |
| H | 0.252870  | -2.236090 | 1.455022  |
| C | 3.389948  | -2.455434 | -0.804735 |
| H | 2.848142  | -0.490361 | -1.491055 |
| C | 3.066236  | -3.521327 | 0.038673  |
| H | 1.680842  | -4.254684 | 1.520536  |
| H | 4.272271  | -2.509741 | -1.437071 |
| H | 3.697298  | -4.405471 | 0.069570  |
| C | -0.785123 | -0.050339 | -0.200270 |
| C | -1.639645 | 1.116568  | 0.035676  |
| C | -1.495655 | -1.278457 | -0.566351 |
| C | -2.977557 | 1.072604  | -0.082090 |
| H | -1.164630 | 2.033963  | 0.366667  |
| C | -2.830406 | -1.336634 | -0.713333 |
| H | -0.903729 | -2.161033 | -0.783083 |
| H | -3.577207 | 1.951132  | 0.141922  |
| H | -3.312321 | -2.260314 | -1.022198 |
| C | 1.326327  | 1.287696  | 0.031429  |
| C | 2.316875  | 1.459999  | 1.016320  |
| C | 1.096527  | 2.344982  | -0.867945 |
| C | 3.026820  | 2.654322  | 1.117504  |
| H | 2.519932  | 0.650017  | 1.710903  |
| C | 1.814465  | 3.537037  | -0.772775 |
| H | 0.360469  | 2.218560  | -1.656547 |
| C | 2.778859  | 3.698614  | 0.223167  |
| H | 3.777583  | 2.769541  | 1.894927  |
| H | 1.624770  | 4.336774  | -1.483960 |
| H | 3.338509  | 4.627133  | 0.297585  |
| C | -3.729512 | -0.158243 | -0.491874 |
| H | -4.332716 | 0.035054  | -1.393088 |
| O | -4.669952 | -0.579517 | 0.533929  |
| O | -5.768328 | 0.381279  | 0.520887  |
| H | -5.658166 | 0.766843  | 1.408274  |

Coordinates

|   |           |           |           |
|---|-----------|-----------|-----------|
| C | 1.220846  | -0.809802 | -0.010677 |
| C | 1.199634  | -2.215342 | 0.059646  |
| C | 2.386982  | -0.192294 | -0.484571 |
| C | 2.309399  | -2.970435 | -0.321266 |
| H | 0.303481  | -2.718114 | 0.405151  |
| C | 3.495265  | -0.948492 | -0.871475 |
| H | 2.433051  | 0.887994  | -0.559355 |
| C | 3.463461  | -2.339961 | -0.788812 |
| H | 2.266361  | -4.054737 | -0.258361 |
| H | 4.384230  | -0.443555 | -1.240345 |
| H | 4.326005  | -2.928065 | -1.090955 |
| C | -1.339782 | -0.568215 | 0.062635  |
| C | -2.457499 | -0.403744 | 0.890752  |
| C | -1.510818 | -1.190734 | -1.180714 |
| C | -3.711970 | -0.860221 | 0.489550  |
| H | -2.333673 | 0.075985  | 1.855286  |
| C | -2.769641 | -1.640576 | -1.586718 |
| H | -0.657267 | -1.330475 | -1.837044 |
| C | -3.874470 | -1.479787 | -0.751492 |
| H | -4.565653 | -0.731273 | 1.149894  |
| H | -2.880825 | -2.121033 | -2.555367 |
| H | -4.853358 | -1.834679 | -1.062953 |
| C | 0.113468  | 1.502748  | 0.132433  |
| C | 0.816247  | 2.394774  | 0.957820  |
| C | -0.467467 | 1.997519  | -1.042438 |
| C | 0.925186  | 3.744167  | 0.618229  |
| H | 1.273199  | 2.033116  | 1.871127  |
| C | -0.347228 | 3.344376  | -1.386322 |
| H | -1.025043 | 1.331580  | -1.691720 |
| C | 0.346195  | 4.225313  | -0.556086 |
| H | 1.466842  | 4.418513  | 1.276480  |
| H | -0.806066 | 3.704444  | -2.303425 |
| H | 0.432521  | 5.275853  | -0.820695 |
| C | 0.015390  | 0.006340  | 0.499937  |
| O | 0.074288  | 0.061573  | 1.961216  |
| O | -0.020064 | -1.264911 | 2.527173  |
| H | 0.923227  | -1.512644 | 2.572582  |

### Molecular oxygen

#### Structure

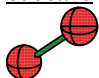

#### Coordinates

|   |          |          |           |
|---|----------|----------|-----------|
| O | 0.000000 | 0.000000 | 0.607296  |
| O | 0.000000 | 0.000000 | -0.607296 |

### Hydroxyl radical

#### Structure

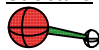

#### Coordinates

|   |          |          |           |
|---|----------|----------|-----------|
| O | 0.000000 | 0.000000 | 0.109213  |
| H | 0.000000 | 0.000000 | -0.873701 |

### Water

#### Structure

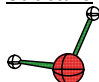

#### Coordinates

|   |          |           |           |
|---|----------|-----------|-----------|
| O | 0.000000 | 0.000000  | 0.119720  |
| H | 0.000000 | 0.761560  | -0.478879 |
| H | 0.000000 | -0.761560 | -0.478879 |

### Methylthiol

#### Structure

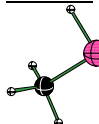

#### Coordinates

|   |           |           |           |
|---|-----------|-----------|-----------|
| C | -1.164836 | 0.019536  | 0.000000  |
| H | -1.531096 | -1.009787 | -0.000021 |
| H | -1.535819 | 0.522757  | 0.895782  |
| H | -1.535817 | 0.522792  | -0.895763 |
| S | 0.667735  | -0.087181 | 0.000000  |
| H | 0.907990  | 1.241915  | 0.000000  |

### CH3S radical

#### Structure

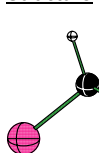

#### Coordinates

|   |           |           |           |
|---|-----------|-----------|-----------|
| S | -0.697635 | 0.000002  | -0.001831 |
| C | 1.115063  | 0.000011  | -0.008304 |
| H | 1.436288  | -0.000589 | 1.042807  |
| H | 1.517776  | 0.899835  | -0.481373 |
| H | 1.517724  | -0.899345 | -0.482319 |

### DMSO

#### Structure

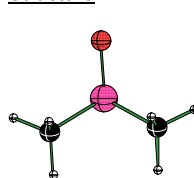

#### Coordinates

|   |           |           |           |
|---|-----------|-----------|-----------|
| S | 0.000012  | 0.242953  | -0.439537 |
| O | -0.000105 | 1.508325  | 0.387008  |
| C | -1.363358 | -0.822250 | 0.180119  |
| H | -1.332320 | -1.796498 | -0.317507 |
| H | -1.275418 | -0.933848 | 1.264946  |
| H | -2.300201 | -0.313698 | -0.059958 |
| C | 1.363419  | -0.822104 | 0.180141  |
| H | 1.275249  | -0.934271 | 1.264893  |
| H | 1.332738  | -1.796125 | -0.317956 |
| H | 2.300233  | -0.313277 | -0.059448 |

### CH2SOCH3 radical

#### Structure

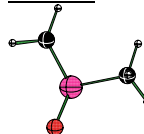

#### Coordinates

|   |           |           |           |
|---|-----------|-----------|-----------|
| S | -0.134927 | -0.142875 | -0.392320 |
| O | -0.638960 | -1.377494 | 0.309817  |
| C | 1.580437  | 0.210819  | 0.188535  |
| H | 1.911303  | 1.170434  | -0.218137 |
| H | 1.588810  | 0.222705  | 1.280536  |
| H | 2.213105  | -0.596367 | -0.187792 |
| C | -0.906676 | 1.298571  | 0.227718  |
| H | -1.932933 | 1.194064  | 0.564051  |
| H | -0.552335 | 2.258771  | -0.137587 |

---
